# Supplementary material for: Contribution from cross-country skiing, start time and shooting components to the overall and isolated biathlon pursuit race performance
Source: PLoS One. 2020 Sep 14;15(9):e0239057. doi: 10.1371/journal.pone.0239057 (PMC7489554; doi:10.1371/journal.pone.0239057)
Supplement: S1 File — (XLSX) [file pone.0239057.s001.xlsx]

## Sheet: Sheet1
RaceID	Year	RaceID	Arena	Distance	HD	MAXC	TOTC	AirTemp	Humid	Gender	Rank	StartSecs	Totaltime	Coursetime	Penaltytime	Rangetime	BIB	BehindWinner	Startsecbehindwinner	CoursebehindW	PenaltybehindW	ShootimeBehindW	Rangetime_short_behindW	IsoRacetime	RaceTimebehindFastestracetime	StartbehindIso	CoursebehindISo	RangetimebehindIso	ShootingTbehindIso	PenaltyBehindIso
BT1516SWRLCP01SWPU	2015	20	Oestersund	10494	29	22	69	1.3	73	F	1	52	1845.1	1510.4	74	208.7	10	0	0	0	0	0	0	1793.1	17.1	-19	-30.6	8.3	15.2	24.2
BT1516SWRLCP01SWPU	2015	20	Oestersund	10494	29	22	69	1.3	73	F	2	71	1847	1541	49.8	185.2	20	1.9	19	30.6	-24.2	-15.2	-8.3	1776	0	0	0	0	0	0
BT1516SWRLCP01SWPU	2015	20	Oestersund	10494	29	22	69	1.3	73	F	3	66	1848.4	1550.5	24.8	207.1	17	3.3	14	40.1	-49.2	-1.3	-0.3	1782.4	6.4	-5	9.5	8	13.9	-25
BT1516SWRLCP01SWPU	2015	20	Oestersund	10494	29	22	69	1.3	73	F	4	43	1857.6	1519.8	97.5	197.3	6	12.5	-9	9.4	23.5	-9.9	-1.5	1814.6	38.6	-28	-21.2	6.8	5.3	47.7
BT1516SWRLCP01SWPU	2015	20	Oestersund	10494	29	22	69	1.3	73	F	5	0	1857.9	1578.2	76.4	203.3	1	12.8	-52	67.8	2.4	2.6	-8	1857.9	81.9	-71	37.2	0.3	17.8	26.6
BT1516SWRLCP01SWPU	2015	20	Oestersund	10494	29	22	69	1.3	73	F	6	40	1865.8	1582.7	53.4	189.7	4	20.7	-12	72.3	-20.6	-22.9	3.9	1825.8	49.8	-31	41.7	12.2	-7.7	3.6
BT1516SWRLCP01SWPU	2015	20	Oestersund	10494	29	22	69	1.3	73	F	7	84	1882.3	1579.3	23.9	195.1	26	37.2	32	68.9	-50.1	-15.2	1.6	1798.3	22.3	13	38.3	9.9	0	-25.9
BT1516SWRLCP01SWPU	2015	20	Oestersund	10494	29	22	69	1.3	73	F	8	60	1911.7	1595.8	51.6	204.3	14	66.6	8	85.4	-22.4	-7	2.6	1851.7	75.7	-11	54.8	10.9	8.2	1.8
BT1516SWRLCP01SWPU	2015	20	Oestersund	10494	29	22	69	1.3	73	F	9	40	1922.9	1546.8	144	192.1	5	77.8	-12	36.4	70	-12.9	-3.7	1882.9	106.9	-31	5.8	4.6	2.3	94.2
BT1516SWRLCP01SWPU	2015	20	Oestersund	10494	29	22	69	1.3	73	F	10	38	1922.9	1599.1	78.1	207.7	3	77.8	-14	88.7	4.1	7.5	-8.5	1884.9	108.9	-33	58.1	-0.2	22.7	28.3
BT1516SWRLCP01SWPU	2015	20	Oestersund	10494	29	22	69	1.3	73	F	11	71	1934.5	1529	119.5	215	18	89.4	19	18.6	45.5	12.8	-6.5	1863.5	87.5	0	-12	1.8	28	69.7
BT1516SWRLCP01SWPU	2015	20	Oestersund	10494	29	22	69	1.3	73	F	12	52	1934.9	1548.5	124.3	210.1	9	89.8	0	38.1	50.3	9.5	-8.1	1882.9	106.9	-19	7.5	0.2	24.7	74.5
BT1516SWRLCP01SWPU	2015	20	Oestersund	10494	29	22	69	1.3	73	F	13	80	1935.4	1556.6	70.6	228.2	23	90.3	28	46.2	-3.4	18.7	0.8	1855.4	79.4	9	15.6	9.1	33.9	20.8
BT1516SWRLCP01SWPU	2015	20	Oestersund	10494	29	22	69	1.3	73	F	14	81	1938.4	1578	76.8	202.6	24	93.3	29	67.6	2.8	3	-9.1	1857.4	81.4	10	37	-0.8	18.2	27
BT1516SWRLCP01SWPU	2015	20	Oestersund	10494	29	22	69	1.3	73	F	15	48	1939.7	1586.9	74.2	230.6	8	94.6	-4	76.5	0.2	21.5	0.4	1891.7	115.7	-23	45.9	8.7	36.7	24.4
BT1516SWRLCP01SWPU	2015	20	Oestersund	10494	29	22	69	1.3	73	F	16	65	1949.7	1605.6	75.9	203.2	15	104.6	13	95.2	1.9	-3.6	-1.9	1884.7	108.7	-6	64.6	6.4	11.6	26.1
BT1516SWRLCP01SWPU	2015	20	Oestersund	10494	29	22	69	1.3	73	F	17	46	1962.4	1565.1	145.2	206.1	7	117.3	-6	54.7	71.2	15.1	-17.7	1916.4	140.4	-25	24.1	-9.4	30.3	95.4
BT1516SWRLCP01SWPU	2015	20	Oestersund	10494	29	22	69	1.3	73	F	18	112	1981.9	1530	127.3	212.6	38	136.8	60	19.6	53.3	1	2.9	1869.9	93.9	41	-11	11.2	16.2	77.5
BT1516SWRLCP01SWPU	2015	20	Oestersund	10494	29	22	69	1.3	73	F	19	141	1984.4	1631.9	25.8	185.7	60	139.3	89	121.5	-48.2	-19.4	-3.6	1843.4	67.4	70	90.9	4.7	-4.2	-24
BT1516SWRLCP01SWPU	2015	20	Oestersund	10494	29	22	69	1.3	73	F	20	114	1988.9	1595.7	77.2	202	39	143.8	62	85.3	3.2	-11	4.3	1874.9	98.9	43	54.7	12.6	4.2	27.4
BT1516SWRLCP01SWPU	2015	20	Oestersund	10494	29	22	69	1.3	73	F	21	54	1997.5	1645.1	99	199.4	12	152.4	2	134.7	25	-17.8	8.5	1943.5	167.5	-17	104.1	16.8	-2.6	49.2
BT1516SWRLCP01SWPU	2015	20	Oestersund	10494	29	22	69	1.3	73	F	22	117	2003.1	1612.3	78.5	195.3	43	158	65	101.9	4.5	-19.2	5.8	1886.1	110.1	46	71.3	14.1	-4	28.7
BT1516SWRLCP01SWPU	2015	20	Oestersund	10494	29	22	69	1.3	73	F	23	79	2006	1587.9	147.5	191.6	22	160.9	27	77.5	73.5	-18	0.9	1927	151	8	46.9	9.2	-2.8	97.7
BT1516SWRLCP01SWPU	2015	20	Oestersund	10494	29	22	69	1.3	73	F	24	119	2007.5	1603	79.9	205.6	45	162.4	67	92.6	5.9	8.7	-11.8	1888.5	112.5	48	62	-3.5	23.9	30.1
BT1516SWRLCP01SWPU	2015	20	Oestersund	10494	29	22	69	1.3	73	F	25	120	2008	1629.5	51.9	206.6	46	162.9	68	119.1	-22.1	-1.6	-0.5	1888	112	49	88.5	7.8	13.6	2.1
BT1516SWRLCP01SWPU	2015	20	Oestersund	10494	29	22	69	1.3	73	F	26	138	2009.1	1618.6	24.7	227.8	56	164	86	108.2	-49.3	16.5	2.6	1871.1	95.1	67	77.6	10.9	31.7	-25.1
BT1516SWRLCP01SWPU	2015	20	Oestersund	10494	29	22	69	1.3	73	F	27	101	2012.1	1586	129.2	195.9	34	167	49	75.6	55.2	-12.5	-0.3	1911.1	135.1	30	45	8	2.7	79.4
BT1516SWRLCP01SWPU	2015	20	Oestersund	10494	29	22	69	1.3	73	F	28	55	2016.1	1648.1	102.1	210.9	13	171	3	137.7	28.1	4.1	-1.9	1961.1	185.1	-16	107.1	6.4	19.3	52.3
BT1516SWRLCP01SWPU	2015	20	Oestersund	10494	29	22	69	1.3	73	F	29	53	2019.1	1647.5	131.1	187.5	11	174	1	137.1	57.1	-25.2	4	1966.1	190.1	-18	106.5	12.3	-10	81.3
BT1516SWRLCP01SWPU	2015	20	Oestersund	10494	29	22	69	1.3	73	F	30	140	2030.1	1600.7	79.5	209.9	58	185	88	90.3	5.5	-6.6	7.8	1890.1	114.1	69	59.7	16.1	8.6	29.7
BT1516SWRLCP02SWPU	2015	22	Hochfilzen	10281	20	18	64	1.8	60	F	1	25	1703.3	1413.1	45.4	219.8	6	0	0	0	0	0	0	1678.3	19.3	-49	24.1	3.3	9	-17.1
BT1516SWRLCP02SWPU	2015	22	Hochfilzen	10281	20	18	64	1.8	60	F	2	15	1716.6	1422.6	72.6	206.4	2	13.3	-10	9.5	27.2	-12	-1.4	1701.6	42.6	-59	33.6	1.9	-3	10.1
BT1516SWRLCP02SWPU	2015	22	Hochfilzen	10281	20	18	64	1.8	60	F	3	29	1721.8	1412.4	45.1	235.3	8	18.5	4	-0.7	-0.3	11	4.5	1692.8	33.8	-45	23.4	7.8	20	-17.4
BT1516SWRLCP02SWPU	2015	22	Hochfilzen	10281	20	18	64	1.8	60	F	4	0	1728.3	1436.1	72.5	219.7	1	25	-25	23	27.1	-2	1.9	1728.3	69.3	-74	47.1	5.2	7	10
BT1516SWRLCP02SWPU	2015	22	Hochfilzen	10281	20	18	64	1.8	60	F	5	74	1733	1389	62.5	207.5	30	29.7	49	-24.1	17.1	-9	-3.3	1659	0	0	0	0	0	0
BT1516SWRLCP02SWPU	2015	22	Hochfilzen	10281	20	18	64	1.8	60	F	6	29	1735.4	1444.1	46.9	215.4	7	32.1	4	31	1.5	3	-7.4	1706.4	47.4	-45	55.1	-4.1	12	-15.6
BT1516SWRLCP02SWPU	2015	22	Hochfilzen	10281	20	18	64	1.8	60	F	7	54	1741.7	1417.8	46.5	223.4	17	38.4	29	4.7	1.1	4	-0.4	1687.7	28.7	-20	28.8	2.9	13	-16
BT1516SWRLCP02SWPU	2015	22	Hochfilzen	10281	20	18	64	1.8	60	F	8	51	1751.9	1427.1	68.1	205.7	16	48.6	26	14	22.7	-17	2.9	1700.9	41.9	-23	38.1	6.2	-8	5.6
BT1516SWRLCP02SWPU	2015	22	Hochfilzen	10281	20	18	64	1.8	60	F	9	54	1752.4	1417.4	66.6	214.4	18	49.1	29	4.3	21.2	-11	5.6	1698.4	39.4	-20	28.4	8.9	-2	4.1
BT1516SWRLCP02SWPU	2015	22	Hochfilzen	10281	20	18	64	1.8	60	F	10	60	1752.8	1437.8	20	235	22	49.5	35	24.7	-25.4	16	-0.8	1692.8	33.8	-14	48.8	2.5	25	-42.5
BT1516SWRLCP02SWPU	2015	22	Hochfilzen	10281	20	18	64	1.8	60	F	11	58	1755.3	1419.1	68.5	209.7	21	52	33	6	23.1	-12	1.9	1697.3	38.3	-16	30.1	5.2	-3	6
BT1516SWRLCP02SWPU	2015	22	Hochfilzen	10281	20	18	64	1.8	60	F	12	37	1759.8	1393.5	110.7	218.6	10	56.5	12	-19.6	65.3	0	-1.2	1722.8	63.8	-37	4.5	2.1	9	48.2
BT1516SWRLCP02SWPU	2015	22	Hochfilzen	10281	20	18	64	1.8	60	F	13	41	1768.1	1475.3	46.3	205.5	12	64.8	16	62.2	0.9	-23	8.7	1727.1	68.1	-33	86.3	12	-14	-16.2
BT1516SWRLCP02SWPU	2015	22	Hochfilzen	10281	20	18	64	1.8	60	F	14	57	1768.3	1420.2	70.2	220.9	20	65	32	7.1	24.8	-8	9.1	1711.3	52.3	-17	31.2	12.4	1	7.7
BT1516SWRLCP02SWPU	2015	22	Hochfilzen	10281	20	18	64	1.8	60	F	15	21	1770.3	1398.9	110.3	240.1	3	67	-4	-14.2	64.9	25	-4.7	1749.3	90.3	-53	9.9	-1.4	34	47.8
BT1516SWRLCP02SWPU	2015	22	Hochfilzen	10281	20	18	64	1.8	60	F	16	23	1775.4	1434.5	90.6	227.3	4	72.1	-2	21.4	45.2	11	-3.5	1752.4	93.4	-51	45.5	-0.2	20	28.1
BT1516SWRLCP02SWPU	2015	22	Hochfilzen	10281	20	18	64	1.8	60	F	17	115	1775.5	1429	20.4	211.1	59	72.2	90	15.9	-25	-7	-1.7	1660.5	1.5	41	40	1.6	2	-42.1
BT1516SWRLCP02SWPU	2015	22	Hochfilzen	10281	20	18	64	1.8	60	F	18	48	1792.2	1444.6	92.3	207.3	14	88.9	23	31.5	46.9	-6	-6.5	1744.2	85.2	-26	55.6	-3.2	3	29.8
BT1516SWRLCP02SWPU	2015	22	Hochfilzen	10281	20	18	64	1.8	60	F	19	63	1795	1450.8	48.6	232.6	23	91.7	38	37.7	3.2	15	-2.2	1732	73	-11	61.8	1.1	24	-13.9
BT1516SWRLCP02SWPU	2015	22	Hochfilzen	10281	20	18	64	1.8	60	F	20	55	1797.8	1435.4	95.8	211.6	19	94.5	30	22.3	50.4	-8	-0.2	1742.8	83.8	-19	46.4	3.1	1	33.3
BT1516SWRLCP02SWPU	2015	22	Hochfilzen	10281	20	18	64	1.8	60	F	21	71	1808.2	1470.2	44.1	222.9	27	104.9	46	57.1	-1.3	5	-1.9	1737.2	78.2	-3	81.2	1.4	14	-18.4
BT1516SWRLCP02SWPU	2015	22	Hochfilzen	10281	20	18	64	1.8	60	F	22	25	1813.7	1421.5	157.7	209.5	5	110.4	0	8.4	112.3	-9	-1.3	1788.7	129.7	-49	32.5	2	0	95.2
BT1516SWRLCP02SWPU	2015	22	Hochfilzen	10281	20	18	64	1.8	60	F	23	72	1814.9	1388.1	138.9	215.9	28	111.6	47	-25	93.5	-3	-0.9	1742.9	83.9	-2	-0.9	2.4	6	76.4
BT1516SWRLCP02SWPU	2015	22	Hochfilzen	10281	20	18	64	1.8	60	F	24	44	1814.9	1413.2	134.2	223.5	13	111.6	19	0.1	88.8	1	2.7	1770.9	111.9	-30	24.2	6	10	71.7
BT1516SWRLCP02SWPU	2015	22	Hochfilzen	10281	20	18	64	1.8	60	F	25	82	1815.9	1424	96.1	213.8	35	112.6	57	10.9	50.7	-6	0	1733.9	74.9	8	35	3.3	3	33.6
BT1516SWRLCP02SWPU	2015	22	Hochfilzen	10281	20	18	64	1.8	60	F	26	88	1818.9	1444.4	69.1	217.4	41	115.6	63	31.3	23.7	-6	3.6	1730.9	71.9	14	55.4	6.9	3	6.6
BT1516SWRLCP02SWPU	2015	22	Hochfilzen	10281	20	18	64	1.8	60	F	27	90	1823.2	1455.8	48.4	229	44	119.9	65	42.7	3	6	3.2	1733.2	74.2	16	66.8	6.5	15	-14.1
BT1516SWRLCP02SWPU	2015	22	Hochfilzen	10281	20	18	64	1.8	60	F	28	70	1823.9	1472	47.3	234.6	26	120.6	45	58.9	1.9	16	-1.2	1753.9	94.9	-4	83	2.1	25	-15.2
BT1516SWRLCP02SWPU	2015	22	Hochfilzen	10281	20	18	64	1.8	60	F	29	50	1834.5	1458.3	94.8	231.4	15	131.2	25	45.2	49.4	10	1.6	1784.5	125.5	-24	69.3	4.9	19	32.3
BT1516SWRLCP02SWPU	2015	22	Hochfilzen	10281	20	18	64	1.8	60	F	30	78	1843.1	1424.6	119.2	221.3	32	139.8	53	11.5	73.8	2	-0.5	1765.1	106.1	4	35.6	2.8	11	56.7
BT1516SWRLCP03SWPU	2015	25	Pokljuka	10365	39	31	77	7.8	52	F	24	89	2003.9	1706.5	24.6	183.8	33	250.8	88	115.6	-1.3	-18	10.7	1914.9	107	88	115.6	10.7	-18	-1.3
BT1516SWRLCP03SWPU	2015	25	Pokljuka	10365	39	31	77	7.8	52	F	27	71	2024.4	1621.5	120.8	211.1	22	160	70	30.6	94.9	16	4	1953.4	145.5	70	30.6	4	16	94.9
BT1516SWRLCP03SWPU	2015	25	Pokljuka	10365	39	31	77	7.8	52	F	1	1	1808.9	1590.9	25.9	191.1	2	18	0	0	0	0	0	1807.9	0	0	0	0	0	0
BT1516SWRLCP03SMPU	2015	25	Pokljuka	10365	39	31	77	7.8	52	F	2	0	1826.9	1615.9	27.6	183.4	1	295.2	-1	25	1.7	-3	-4.7	1826.9	19	-1	25	-4.7	-3	1.7
BT1516SWRLCP03SWPU	2015	25	Pokljuka	10365	39	31	77	7.8	52	F	3	44	1864.1	1568.4	47.6	204.1	10	69.4	43	-22.5	21.7	12	1	1820.1	12.2	43	-22.5	1	12	21.7
BT1516SWRLCP03SWPU	2015	25	Pokljuka	10365	39	31	77	7.8	52	F	4	25	1873.5	1612.5	48.2	187.8	5	82.8	24	21.6	22.3	-1	-2.3	1848.5	40.6	24	21.6	-2.3	-1	22.3
BT1516SWRLCP03SWPU	2015	25	Pokljuka	10365	39	31	77	7.8	52	F	5	42	1878.3	1605.5	48.2	182.6	9	127.9	41	14.6	22.3	-9	0.5	1836.3	28.4	41	14.6	0.5	-9	22.3
BT1516SWRLCP03SWPU	2015	25	Pokljuka	10365	39	31	77	7.8	52	F	6	56	1878.8	1585.4	49.2	188.2	13	88.7	55	-5.5	23.3	-6	3.1	1822.8	14.9	55	-5.5	3.1	-6	23.3
BT1516SWRLCP03SWPU	2015	25	Pokljuka	10365	39	31	77	7.8	52	F	7	16	1891.7	1614	71.9	189.8	4	115.2	15	23.1	46	-5	3.7	1875.7	67.8	15	23.1	3.7	-5	46
BT1516SWRLCP03SWPU	2015	25	Pokljuka	10365	39	31	77	7.8	52	F	8	66	1895.4	1589.8	67.9	171.7	18	126.7	65	-1.1	42	-18	-1.4	1829.4	21.5	65	-1.1	-1.4	-18	42
BT1516SWRLCP03SWPU	2015	25	Pokljuka	10365	39	31	77	7.8	52	F	9	51	1897.6	1640.3	23.6	182.7	12	144.9	50	49.4	-2.3	-11	2.6	1846.6	38.7	50	49.4	2.6	-11	-2.3
BT1516SWRLCP03SWPU	2015	25	Pokljuka	10365	39	31	77	7.8	52	F	10	31	1904.3	1612.9	73.5	186.9	6	64.6	30	22	47.6	-1	-3.2	1873.3	65.4	30	22	-3.2	-1	47.6
BT1516SWRLCP03SWPU	2015	25	Pokljuka	10365	39	31	77	7.8	52	F	11	64	1918.3	1592.5	94.4	167.4	16	266.6	63	1.6	68.5	-22	-1.7	1854.3	46.4	63	1.6	-1.7	-22	68.5
BT1516SWRLCP03SWPU	2015	25	Pokljuka	10365	39	31	77	7.8	52	F	12	13	1924.1	1618.3	97.6	195.2	3	0	12	27.4	71.7	3	1.1	1911.1	103.2	12	27.4	1.1	3	71.7
BT1516SWRLCP03SWPU	2015	25	Pokljuka	10365	39	31	77	7.8	52	F	13	67	1927	1602.7	66.8	190.5	20	186.5	66	11.8	40.9	2	-2.6	1860	52.1	66	11.8	-2.6	2	40.9
BT1516SWRLCP03SWPU	2015	25	Pokljuka	10365	39	31	77	7.8	52	F	14	96	1931.6	1604.5	49.1	182	37	302.5	95	13.6	23.2	-10	0.9	1835.6	27.7	95	13.6	0.9	-10	23.2
BT1516SWRLCP03SWPU	2015	25	Pokljuka	10365	39	31	77	7.8	52	F	15	65	1935.6	1609.5	92.7	168.4	17	109.4	64	18.6	66.8	-19	-3.7	1870.6	62.7	64	18.6	-3.7	-19	66.8
BT1516SWRLCP03SWPU	2015	25	Pokljuka	10365	39	31	77	7.8	52	F	16	41	1936.8	1619.3	98.1	178.4	7	95.4	40	28.4	72.2	-8	-4.7	1895.8	87.9	40	28.4	-4.7	-8	72.2
BT1516SWRLCP03SWPU	2015	25	Pokljuka	10365	39	31	77	7.8	52	F	17	48	1953.8	1617.4	95.6	192.8	11	55.2	47	26.5	69.7	2	-0.3	1905.8	97.9	47	26.5	-0.3	2	69.7
BT1516SWRLCP03SWPU	2015	25	Pokljuka	10365	39	31	77	7.8	52	F	18	57	1961.8	1628.6	71.9	204.3	14	69.9	56	37.7	46	9	4.2	1904.8	96.9	56	37.7	4.2	9	46
BT1516SWRLCP03SWPU	2015	25	Pokljuka	10365	39	31	77	7.8	52	F	19	71	1968.9	1643.9	47	207	21	118.1	70	53	21.1	12	3.9	1897.9	90	70	53	3.9	12	21.1
BT1516SWRLCP03SWPU	2015	25	Pokljuka	10365	39	31	77	7.8	52	F	20	74	1976.3	1643.2	70.7	188.4	24	287.4	73	52.3	44.8	-7	4.3	1902.3	94.4	73	52.3	4.3	-7	44.8
BT1516SWRLCP03SWPU	2015	25	Pokljuka	10365	39	31	77	7.8	52	F	21	115	1985.8	1667.5	22.7	180.6	47	260.8	114	76.6	-3.2	-12	1.5	1870.8	62.9	114	76.6	1.5	-12	-3.2
BT1516SWRLCP03SWPU	2015	25	Pokljuka	10365	39	31	77	7.8	52	F	22	66	1995.4	1664.7	73.4	191.3	19	86.5	65	73.8	47.5	-3	3.2	1929.4	121.5	65	73.8	3.2	-3	47.5
BT1516SWRLCP03SWPU	2015	25	Pokljuka	10365	39	31	77	7.8	52	F	23	90	1998.6	1653.9	50.9	203.8	34	195	89	63	25	5	7.7	1908.6	100.7	89	63	7.7	5	25
BT1516SWRLCP03SWPU	2015	25	Pokljuka	10365	39	31	77	7.8	52	F	25	98	2010.8	1654.2	70.8	187.8	38	122.7	97	63.3	44.9	-3	-0.3	1912.8	104.9	97	63.3	-0.3	-3	44.9
BT1516SWRLCP03SWPU	2015	25	Pokljuka	10365	39	31	77	7.8	52	F	26	76	2023.4	1636.6	118	192.8	27	218.5	75	45.7	92.1	-1	2.7	1947.4	139.5	75	45.7	2.7	-1	92.1
BT1516SWRLCP03SWPU	2015	25	Pokljuka	10365	39	31	77	7.8	52	F	28	121	2024.6	1632	73.9	197.7	52	369.1	120	41.1	48	8	-1.4	1903.6	95.7	120	41.1	-1.4	8	48
BT1516SWRLCP03SWPU	2015	25	Pokljuka	10365	39	31	77	7.8	52	F	29	117	2026.7	1640.8	74.4	194.5	48	176.9	116	49.9	48.5	1	2.4	1909.7	101.8	116	49.9	2.4	1	48.5
BT1516SWRLCP03SWPU	2015	25	Pokljuka	10365	39	31	77	7.8	52	F	30	76	2027.4	1674.2	76.9	200.3	26	328.2	75	83.3	51	2	7.2	1951.4	143.5	75	83.3	7.2	2	51
BT1516SWRLCP04SWPU	2015	27	Ruhpolding	10425	26	18	60	3.9	85	F	11	22	2047.9	1764.8	45.4	215.7	5	0	19	81.1	3.5	-20	8.4	2025.9	77.7	-43	101.5	9.1	9	-41.9
BT1516SWRLCP04SWPU	2015	27	Ruhpolding	10425	26	18	60	3.9	85	F	1	3	1955.9	1683.7	41.9	227.3	4	112.1	0	0	0	0	0	1952.9	4.7	-62	20.4	0.7	29	-45.4
BT1516SWRLCP04SWPU	2015	27	Ruhpolding	10425	26	18	60	3.9	85	F	2	0	1963.2	1704.4	39.3	219.5	2	84.3	-3	20.7	-2.6	-3	-4.8	1963.2	15	-65	41.1	-4.1	26	-48
BT1516SWRLCP04SWPU	2015	27	Ruhpolding	10425	26	18	60	3.9	85	F	3	23	2009.5	1728.2	65.9	192.4	6	92	20	44.5	24	-41	6.1	1986.5	38.3	-42	64.9	6.8	-12	-21.4
BT1516SWRLCP04SWPU	2015	27	Ruhpolding	10425	26	18	60	3.9	85	F	4	65	2013.2	1663.3	87.3	197.6	17	148.7	62	-20.4	45.4	-29	-0.7	1948.2	0	0	0	0	0	0
BT1516SWRLCP04SWPU	2015	27	Ruhpolding	10425	26	18	60	3.9	85	F	5	53	2013.4	1677.5	63.8	219.1	12	124.1	50	-6.2	21.9	-8	-0.2	1960.4	12.2	-12	14.2	0.5	21	-23.5
BT1516SWRLCP04SWPU	2015	27	Ruhpolding	10425	26	18	60	3.9	85	F	6	56	2016.9	1709	40.1	211.8	15	334.1	53	25.3	-1.8	-20	4.5	1960.9	12.7	-9	45.7	5.2	9	-47.2
BT1516SWRLCP04SWPU	2015	27	Ruhpolding	10425	26	18	60	3.9	85	F	7	36	2030.9	1696.4	92.2	206.3	9	79.3	33	12.7	50.3	-23	2	1994.9	46.7	-29	33.1	2.7	6	4.9
BT1516SWRLCP04SWPU	2015	27	Ruhpolding	10425	26	18	60	3.9	85	F	8	35	2035.2	1752.7	42.3	205.2	8	87.8	32	69	0.4	-22	-0.1	2000.2	52	-30	89.4	0.6	7	-45
BT1516SWRLCP04SMPU	2015	27	Ruhpolding	10425	26	18	60	3.9	85	F	9	0	2040.2	1706.4	116	217.8	1	314.8	-3	22.7	74.1	-16	6.5	2040.2	92	-65	43.1	7.2	13	28.7
BT1516SWRLCP04SWPU	2015	27	Ruhpolding	10425	26	18	60	3.9	85	F	10	32	2043.7	1737	68.1	206.6	7	53.6	29	53.3	26.2	-24	3.3	2011.7	63.5	-33	73.7	4	5	-19.2
BT1516SWRLCP04SWPU	2015	27	Ruhpolding	10425	26	18	60	3.9	85	F	12	87	2058.4	1762.6	15.4	193.4	27	150.8	84	78.9	-26.5	-35	1.1	1971.4	23.2	22	99.3	1.8	-6	-71.9
BT1516SWRLCP04SWPU	2015	27	Ruhpolding	10425	26	18	60	3.9	85	F	13	2	2068	1699.3	147.3	219.4	3	7.3	-1	15.6	105.4	-9	1.1	2066	117.8	-63	36	1.8	20	60
BT1516SWRLCP04SWPU	2015	27	Ruhpolding	10425	26	18	60	3.9	85	F	14	75	2071.8	1777	15.2	204.6	18	57.3	72	93.3	-26.7	-25	2.3	1996.8	48.6	10	113.7	3	4	-72.1
BT1516SWRLCP04SWPU	2015	27	Ruhpolding	10425	26	18	60	3.9	85	F	15	45	2080	1728.9	92.6	213.5	11	147.5	42	45.2	50.7	-16	2.2	2035	86.8	-20	65.6	2.9	13	5.3
BT1516SWRLCP04SWPU	2015	27	Ruhpolding	10425	26	18	60	3.9	85	F	16	96	2080.1	1706.2	64.6	213.3	35	201.8	93	22.5	22.7	-11	-3	1984.1	35.9	31	42.9	-2.3	18	-22.7
BT1516SWRLCP04SWPU	2015	27	Ruhpolding	10425	26	18	60	3.9	85	F	17	105	2084.6	1728.4	41.7	209.5	41	155.7	102	44.7	-0.2	-17	-0.8	1979.6	31.4	40	65.1	-0.1	12	-45.6
BT1516SWRLCP04SWPU	2015	27	Ruhpolding	10425	26	18	60	3.9	85	F	18	76	2089.2	1756.2	41.8	215.2	20	148.3	73	72.5	-0.1	-13	0.9	2013.2	65	11	92.9	1.6	16	-45.5
BT1516SWRLCP04SWPU	2015	27	Ruhpolding	10425	26	18	60	3.9	85	F	19	84	2093.2	1739.4	68.2	201.6	25	166.9	81	55.7	26.3	-27	1.3	2009.2	61	19	76.1	2	2	-19.1
BT1516SWRLCP04SWPU	2015	27	Ruhpolding	10425	26	18	60	3.9	85	F	20	107	2096.9	1696.7	88	205.2	42	128.7	104	13	46.1	-29	6.9	1989.9	41.7	42	33.4	7.6	0	0.7
BT1516SWRLCP04SWPU	2015	27	Ruhpolding	10425	26	18	60	3.9	85	F	21	88	2098.7	1737.2	67.6	205.9	31	196.3	85	53.5	25.7	-23	1.6	2010.7	62.5	23	73.9	2.3	6	-19.7
BT1516SWRLCP04SWPU	2015	27	Ruhpolding	10425	26	18	60	3.9	85	F	22	39	2103.4	1742.5	120.3	201.6	10	75	36	58.8	78.4	-25	-0.7	2064.4	116.2	-26	79.2	0	4	33
BT1516SWRLCP04SWPU	2015	27	Ruhpolding	10425	26	18	60	3.9	85	F	23	76	2104.2	1749.8	68.1	210.3	19	115.9	73	66.1	26.2	-24	7	2028.2	80	11	86.5	7.7	5	-19.2
BT1516SWRLCP04SWPU	2015	27	Ruhpolding	10425	26	18	60	3.9	85	F	24	58	2104.6	1724	94.2	228.4	16	61	55	40.3	52.3	1	0.1	2046.6	98.4	-7	60.7	0.8	30	6.9
BT1516SWRLCP04SWPU	2015	27	Ruhpolding	10425	26	18	60	3.9	85	F	25	108	2105.5	1711.5	66.4	219.6	44	470.6	105	27.8	24.5	-9	1.3	1997.5	49.3	43	48.2	2	20	-20.9
BT1516SWRLCP04SWPU	2015	27	Ruhpolding	10425	26	18	60	3.9	85	F	26	85	2106.7	1733.7	68.2	219.8	26	137.3	82	50	26.3	-15	7.5	2021.7	73.5	20	70.4	8.2	14	-19.1
BT1516SWRLCP04SWPU	2015	27	Ruhpolding	10425	26	18	60	3.9	85	F	27	81	2108.8	1780.9	44.9	202	22	183.9	78	97.2	3	-27	1.7	2027.8	79.6	16	117.6	2.4	2	-42.4
BT1516SWRLCP04SWPU	2015	27	Ruhpolding	10425	26	18	60	3.9	85	F	28	103	2111.6	1770.9	15	222.7	40	263.1	100	87.2	-26.9	-6	1.4	2008.6	60.4	38	107.6	2.1	23	-72.3
BT1516SWRLCP04SWPU	2015	27	Ruhpolding	10425	26	18	60	3.9	85	F	29	55	2116.5	1729.7	119.5	212.3	13	57.5	52	46	77.6	-17	2	2061.5	113.3	-10	66.4	2.7	12	32.2
BT1516SWRLCP04SWPU	2015	27	Ruhpolding	10425	26	18	60	3.9	85	F	30	82	2122.8	1733.1	95.5	212.2	24	184	79	49.4	53.6	-18	2.9	2040.8	92.6	17	69.8	3.6	11	8.2
BT1516SWRLCP06SWPU	2015	29	Anterselva	10420	26	11	57	1.8	45	F	20	40	1902.2	1456.9	181.5	223.8	10	54.6	18	-63.2	116.5	24	-0.4	1862.2	93.9	-11	-14.2	-0.1	-16	124.2
BT1516SWRLCP06SWPU	2015	29	Anterselva	10420	26	11	57	1.8	45	F	1	22	1807.3	1520.1	65	200.2	3	18	0	0	0	0	0	1785.3	17	-29	49	0.3	-40	7.7
BT1516SWRLCP06SWPU	2015	29	Anterselva	10420	26	11	57	1.8	45	F	2	51	1819.3	1471.1	57.3	239.9	16	79.6	29	-49	-7.7	40	-0.3	1768.3	0	0	0	0	0	0
BT1516SWRLCP06SWPU	2015	29	Anterselva	10420	26	11	57	1.8	45	F	3	8	1825.3	1526.8	108.8	181.7	2	55.8	-14	6.7	43.8	-18	-0.5	1817.3	49	-43	55.7	-0.2	-58	51.5
BT1516SWRLCP06SWPU	2015	29	Anterselva	10420	26	11	57	1.8	45	F	4	64	1855.3	1489.4	102	199.9	20	104.3	42	-30.7	37	-4	3.7	1791.3	23	13	18.3	4	-44	44.7
BT1516SWRLCP06SWPU	2015	29	Anterselva	10420	26	11	57	1.8	45	F	5	72	1859.2	1496.9	85.2	205.1	26	200.1	50	-23.2	20.2	-1	5.9	1787.2	18.9	21	25.8	6.2	-41	27.9
BT1516SWRLCP06SWPU	2015	29	Anterselva	10420	26	11	57	1.8	45	F	6	36	1859.8	1495.3	102.2	226.3	7	102.9	14	-24.8	37.2	28	-1.9	1823.8	55.5	-15	24.2	-1.6	-12	44.9
BT1516SWRLCP06SWPU	2015	29	Anterselva	10420	26	11	57	1.8	45	F	7	38	1861.9	1497.1	106.8	220	9	75.2	16	-23	41.8	21	-1.2	1823.9	55.6	-13	26	-0.9	-19	49.5
BT1516SWRLCP06SMPU	2015	29	Anterselva	10420	26	11	57	1.8	45	F	8	0	1863.1	1546	118.4	198.7	1	390.6	-22	25.9	53.4	-4	2.5	1863.1	94.8	-51	74.9	2.8	-44	61.1
BT1516SWRLCP06SWPU	2015	29	Anterselva	10420	26	11	57	1.8	45	F	9	66	1877	1518.6	84.7	207.7	21	48	44	-1.5	19.7	4	3.5	1811	42.7	15	47.5	3.8	-36	27.4
BT1516SWRLCP06SWPU	2015	29	Anterselva	10420	26	11	57	1.8	45	F	10	25	1879.3	1484.1	149.7	220.5	4	0	3	-36	84.7	21	-0.7	1854.3	86	-26	13	-0.4	-19	92.4
BT1516SWRLCP06SWPU	2015	29	Anterselva	10420	26	11	57	1.8	45	F	11	68	1879.6	1531.3	59.9	220.4	23	169.1	46	11.2	-5.1	16	4.2	1811.6	43.3	17	60.2	4.5	-24	2.6
BT1516SWRLCP06SWPU	2015	29	Anterselva	10420	26	11	57	1.8	45	F	12	84	1880.1	1498.3	83.5	214.3	32	117.3	62	-21.8	18.5	7	7.1	1796.1	27.8	33	27.2	7.4	-33	26.2
BT1516SWRLCP06SWPU	2015	29	Anterselva	10420	26	11	57	1.8	45	F	13	37	1882.5	1495.9	131.9	217.7	8	52.5	15	-24.2	66.9	13	4.5	1845.5	77.2	-14	24.8	4.8	-27	74.6
BT1516SWRLCP06SWPU	2015	29	Anterselva	10420	26	11	57	1.8	45	F	14	28	1882.7	1516.3	130	208.4	5	72	6	-3.8	65	10	-1.8	1854.7	86.4	-23	45.2	-1.5	-30	72.7
BT1516SWRLCP06SWPU	2015	29	Anterselva	10420	26	11	57	1.8	45	F	15	51	1886.9	1509.2	104.6	222.1	14	82.9	29	-10.9	39.6	19	2.9	1835.9	67.6	0	38.1	3.2	-21	47.3
BT1516SWRLCP06SWPU	2015	29	Anterselva	10420	26	11	57	1.8	45	F	16	50	1890.2	1499.5	127.2	213.5	13	107.1	28	-20.6	62.2	12	1.3	1840.2	71.9	-1	28.4	1.6	-28	69.9
BT1516SWRLCP06SWPU	2015	29	Anterselva	10420	26	11	57	1.8	45	F	17	90	1895.3	1487.1	109.9	208.3	37	126.8	68	-33	44.9	9	-0.9	1805.3	37	39	16	-0.6	-31	52.6
BT1516SWRLCP06SWPU	2015	29	Anterselva	10420	26	11	57	1.8	45	F	18	79	1896.1	1521.6	81.8	213.7	29	123	57	1.5	16.8	9	4.5	1817.1	48.8	28	50.5	4.8	-31	24.5
BT1516SWRLCP06SWPU	2015	29	Anterselva	10420	26	11	57	1.8	45	F	19	107	1898.1	1521.4	38.6	231.1	46	101.9	85	1.3	-26.4	27	3.9	1791.1	22.8	56	50.3	4.2	-13	-18.7
BT1516SWRLCP06SWPU	2015	29	Anterselva	10420	26	11	57	1.8	45	F	21	62	1905.1	1514.4	106.7	222	18	97.9	40	-5.7	41.7	17	4.8	1843.1	74.8	11	43.3	5.1	-23	49.4
BT1516SWRLCP06SWPU	2015	29	Anterselva	10420	26	11	57	1.8	45	F	22	53	1905.2	1520.3	110.3	221.6	17	12	31	0.2	45.3	15	6.4	1852.2	83.9	2	49.2	6.7	-25	53
BT1516SWRLCP06SWPU	2015	29	Anterselva	10420	26	11	57	1.8	45	F	23	78	1906	1536.6	86.6	204.8	27	51.9	56	16.5	21.6	1	3.6	1828	59.7	27	65.5	3.9	-39	29.3
BT1516SWRLCP06SWPU	2015	29	Anterselva	10420	26	11	57	1.8	45	F	24	110	1907.5	1516.8	57.6	223.1	50	205.3	88	-3.3	-7.4	22	0.9	1797.5	29.2	59	45.7	1.2	-18	0.3
BT1516SWRLCP06SWPU	2015	29	Anterselva	10420	26	11	57	1.8	45	F	25	104	1909.2	1537.4	41.2	226.6	45	136.4	82	17.3	-23.8	31	-4.6	1805.2	36.9	53	66.3	-4.3	-9	-16.1
BT1516SWRLCP06SWPU	2015	29	Anterselva	10420	26	11	57	1.8	45	F	26	33	1910.2	1513.8	133.2	230.2	6	75.4	11	-6.3	68.2	28	2	1877.2	108.9	-18	42.7	2.3	-12	75.9
BT1516SWRLCP06SWPU	2015	29	Anterselva	10420	26	11	57	1.8	45	F	27	63	1911.6	1502.2	127	219.4	19	97.8	41	-17.9	62	9	10.2	1848.6	80.3	12	31.1	10.5	-31	69.7
BT1516SWRLCP06SWPU	2015	29	Anterselva	10420	26	11	57	1.8	45	F	28	50	1914.4	1507.3	131.7	225.4	12	117	28	-12.8	66.7	17	8.2	1864.4	96.1	-1	36.2	8.5	-23	74.4
BT1516SWRLCP06SWPU	2015	29	Anterselva	10420	26	11	57	1.8	45	F	29	49	1924.3	1493.7	180.6	201	11	94.9	27	-26.4	115.6	-2	2.8	1875.3	107	-2	22.6	3.1	-42	123.3
BT1516SWRLCP06SWPU	2015	29	Anterselva	10420	26	11	57	1.8	45	F	30	83	1924.6	1488.4	124.7	228.5	31	130.9	61	-31.7	59.7	25	3.3	1841.6	73.3	32	17.3	3.6	-15	67.4
BT1516SWRLCP08SWPU	2015	31	Presque	10290	19	17	65	-13.6	45	F	18	41	2021.5	1565.2	201	214.3	8	79.8	41	20.5	98.6	-21	-2.2	1980.5	102.5	-66	-19.7	-6.8	9	120
BT1516SWRLCP08SWPU	2015	31	Presque	10290	19	17	65	-13.6	45	F	25	82	2047	1550.5	198.5	216	19	151.8	82	5.8	96.1	-29	7.5	1965	87	-25	-34.4	2.9	1	117.5
BT1516SWRLCP08SWPU	2015	31	Presque	10290	19	17	65	-13.6	45	F	26	38	2048.2	1566.2	201.6	242.4	6	34	38	21.5	99.2	3	1.9	2010.2	132.2	-69	-18.7	-2.7	33	120.6
BT1516SWRLCP08SWPU	2015	31	Presque	10290	19	17	65	-13.6	45	F	30	140	2062.2	1675.2	60.2	186.8	52	138.4	140	130.5	-42.2	-60	9.3	1922.2	44.2	33	90.3	4.7	-30	-20.8
BT1516SWRLCP08SMPU	2015	31	Presque	10290	19	17	65	-13.6	45	F	1	0	1884.6	1544.7	102.4	237.5	1	342.1	0	0	0	0	0	1884.6	6.6	-107	-40.2	-4.6	30	21.4
BT1516SWRLCP08SWPU	2015	31	Presque	10290	19	17	65	-13.6	45	F	2	25	1918.6	1545.3	103.5	244.8	5	38.8	25	0.6	1.1	4	3.3	1893.6	15.6	-82	-39.6	-1.3	34	22.5
BT1516SWRLCP08SWPU	2015	31	Presque	10290	19	17	65	-13.6	45	F	3	21	1923.4	1522.9	151.4	228.1	4	43.9	21	-21.8	49	-11	1.6	1902.4	24.4	-86	-62	-3	19	70.4
BT1516SWRLCP08SWPU	2015	31	Presque	10290	19	17	65	-13.6	45	F	4	19	1928.5	1584.1	112	213.4	3	56.9	19	39.4	9.6	-26	1.9	1909.5	31.5	-88	-0.8	-2.7	4	31
BT1516SWRLCP08SWPU	2015	31	Presque	10290	19	17	65	-13.6	45	F	5	18	1941.5	1561.6	128.7	233.2	2	0	18	16.9	26.3	-6	1.7	1923.5	45.5	-89	-23.3	-2.9	24	47.7
BT1516SWRLCP08SWPU	2015	31	Presque	10290	19	17	65	-13.6	45	F	6	45	1950	1584.1	104.3	216.6	10	75	45	39.4	1.9	-21	0.1	1905	27	-62	-0.8	-4.5	9	23.3
BT1516SWRLCP08SWPU	2015	31	Presque	10290	19	17	65	-13.6	45	F	7	63	1953.1	1559.6	103.3	227.2	14	215.7	63	14.9	0.9	-8	-2.3	1890.1	12.1	-44	-25.3	-6.9	22	22.3
BT1516SWRLCP08SWPU	2015	31	Presque	10290	19	17	65	-13.6	45	F	8	42	1959.6	1621.3	81.5	214.8	9	136.9	42	76.6	-20.9	-22	-0.7	1917.6	39.6	-65	36.4	-5.3	8	0.5
BT1516SWRLCP08SWPU	2015	31	Presque	10290	19	17	65	-13.6	45	F	9	39	1964.4	1552.4	176.3	196.7	7	163.6	39	7.7	73.9	-40	-0.8	1925.4	47.4	-68	-32.5	-5.4	-10	95.3
BT1516SWRLCP08SWPU	2015	31	Presque	10290	19	17	65	-13.6	45	F	10	58	1965.5	1558.3	127.7	221.5	12	89.5	58	13.6	25.3	-12	-4	1907.5	29.5	-49	-26.6	-8.6	18	46.7
BT1516SWRLCP08SWPU	2015	31	Presque	10290	19	17	65	-13.6	45	F	11	55	1974.1	1550.3	127.9	240.9	11	65.4	55	5.6	25.5	1	2.4	1919.1	41.1	-52	-34.6	-2.2	31	46.9
BT1516SWRLCP08SWPU	2015	31	Presque	10290	19	17	65	-13.6	45	F	12	94	1980.4	1609.1	82.2	195.1	28	161.6	94	64.4	-20.2	-49	6.6	1886.4	8.4	-13	24.2	2	-19	1.2
BT1516SWRLCP08SWPU	2015	31	Presque	10290	19	17	65	-13.6	45	F	13	65	1982.6	1619.2	82.8	215.6	15	68.5	65	74.5	-19.6	-25	3.1	1917.6	39.6	-42	34.3	-1.5	5	1.8
BT1516SWRLCP08SWPU	2015	31	Presque	10290	19	17	65	-13.6	45	F	14	107	1985	1584.9	81	212.1	36	372.8	107	40.2	-21.4	-30	4.6	1878	0	0	0	0	0	0
BT1516SWRLCP08SWPU	2015	31	Presque	10290	19	17	65	-13.6	45	F	15	69	1990.1	1589.5	108.8	222.8	17	98	69	44.8	6.4	-25	10.3	1921.1	43.1	-38	4.6	5.7	5	27.8
BT1516SWRLCP08SWPU	2015	31	Presque	10290	19	17	65	-13.6	45	F	16	111	2000.5	1589.6	86.4	213.5	39	329.2	111	44.9	-16	-30	6	1889.5	11.5	4	4.7	1.4	0	5.4
BT1516SWRLCP08SWPU	2015	31	Presque	10290	19	17	65	-13.6	45	F	17	95	2005.1	1600.7	79.6	229.8	30	137.5	95	56	-22.8	-10	2.3	1910.1	32.1	-12	15.8	-2.3	20	-1.4
BT1516SWRLCP08SWPU	2015	31	Presque	10290	19	17	65	-13.6	45	F	19	108	2021.5	1604.1	81.4	228	37	100.4	108	59.4	-21	-9	-0.5	1913.5	35.5	1	19.2	-5.1	21	0.4
BT1516SWRLCP08SWPU	2015	31	Presque	10290	19	17	65	-13.6	45	F	20	95	2022.1	1575.7	123.5	227.9	29	95.8	95	31	21.1	-10	0.4	1927.1	49.1	-12	-9.2	-4.2	20	42.5
BT1516SWRLCP08SWPU	2015	31	Presque	10290	19	17	65	-13.6	45	F	21	135	2023	1585.6	80.4	222	50	237.7	135	40.9	-22	-14	-1.5	1888	10	28	0.7	-6.1	16	-0.6
BT1516SWRLCP08SWPU	2015	31	Presque	10290	19	17	65	-13.6	45	F	22	73	2036.4	1597.1	128.7	237.6	18	105.5	73	52.4	26.3	-4	4.1	1963.4	85.4	-34	12.2	-0.5	26	47.7
BT1516SWRLCP08SWPU	2015	31	Presque	10290	19	17	65	-13.6	45	F	23	99	2038.6	1592	101.2	246.4	32	201.1	99	47.3	-1.2	1	7.9	1939.6	61.6	-8	7.1	3.3	31	20.2
BT1516SWRLCP08SWPU	2015	31	Presque	10290	19	17	65	-13.6	45	F	24	94	2046.2	1607.6	108.5	236.1	27	168.9	94	62.9	6.1	-13	11.6	1952.2	74.2	-13	22.7	7	17	27.5
BT1516SWRLCP08SWPU	2015	31	Presque	10290	19	17	65	-13.6	45	F	27	99	2052.2	1624.2	113.9	215.1	33	154	99	79.5	11.5	-28	5.6	1953.2	75.2	-8	39.3	1	2	32.9
BT1516SWRLCP08SWPU	2015	31	Presque	10290	19	17	65	-13.6	45	F	28	92	2053.5	1585.4	151.2	224.9	26	224	92	40.7	48.8	-15	2.4	1961.5	83.5	-15	0.5	-2.2	15	70.2
BT1516SWRLCP08SWPU	2015	31	Presque	10290	19	17	65	-13.6	45	F	29	127	2057.7	1604.5	109.7	216.5	46	257.1	127	59.8	7.3	-27	6	1930.7	52.7	20	19.6	1.4	3	28.7
BT1516SWRLCP09SMPU	2015	33	Khanty	10290	36	21	52	-1.1	40	F	1	0	1806.7	1524.7	81.2	200.8	1	266	0	0	0	0	0	1806.7	43.5	-45	10.5	5	2.9	25.1
BT1516SWRLCP09SWPU	2015	33	Khanty	10290	36	21	52	-1.1	40	F	2	45	1808.2	1514.2	56.1	192.9	10	101.5	45	-10.5	-25.1	-2.9	-5	1763.2	0	0	0	0	0	0
BT1516SWRLCP09SWPU	2015	33	Khanty	10290	36	21	52	-1.1	40	F	3	28	1812.4	1546.8	57.6	180	5	58.4	28	22.1	-23.6	-20.4	-0.4	1784.4	21.2	-17	32.6	4.6	-17.5	1.5
BT1516SWRLCP09SWPU	2015	33	Khanty	10290	36	21	52	-1.1	40	F	4	3	1813.2	1528.3	77.5	204.4	2	0	3	3.6	-3.7	2.4	1.2	1810.2	47	-42	14.1	6.2	5.3	21.4
BT1516SWRLCP09SWPU	2015	33	Khanty	10290	36	21	52	-1.1	40	F	5	32	1813.3	1539.4	57.1	184.8	6	5.7	32	14.7	-24.1	-13.7	-2.3	1781.3	18.1	-13	25.2	2.7	-10.8	1
BT1516SWRLCP09SWPU	2015	33	Khanty	10290	36	21	52	-1.1	40	F	6	47	1819.8	1532.1	55.6	185.1	13	100.3	47	7.4	-25.6	-19.6	3.9	1772.8	9.6	2	17.9	8.9	-16.7	-0.5
BT1516SWRLCP09SWPU	2015	33	Khanty	10290	36	21	52	-1.1	40	F	7	34	1849.6	1541.9	79.8	193.9	7	6.6	34	17.2	-1.4	-2.3	-4.6	1815.6	52.4	-11	27.7	0.4	0.6	23.7
BT1516SWRLCP09SWPU	2015	33	Khanty	10290	36	21	52	-1.1	40	F	8	5	1852.3	1560	109.4	177.9	3	6.5	5	35.3	28.2	-24	1.1	1847.3	84.1	-40	45.8	6.1	-21.1	53.3
BT1516SWRLCP09SWPU	2015	33	Khanty	10290	36	21	52	-1.1	40	F	9	82	1856.6	1545.5	30.3	198.8	26	133.2	82	20.8	-50.9	0.5	-2.5	1774.6	11.4	37	31.3	2.5	3.4	-25.8
BT1516SWRLCP09SWPU	2015	33	Khanty	10290	36	21	52	-1.1	40	F	10	24	1865.1	1566.4	76.5	198.2	4	45.6	24	41.7	-4.7	1.2	-3.8	1841.1	77.9	-21	52.2	1.2	4.1	20.4
BT1516SWRLCP09SWPU	2015	33	Khanty	10290	36	21	52	-1.1	40	F	11	37	1872.6	1541.4	100.6	193.6	8	42.9	37	16.7	19.4	3	-10.2	1835.6	72.4	-8	27.2	-5.2	5.9	44.5
BT1516SWRLCP09SWPU	2015	33	Khanty	10290	36	21	52	-1.1	40	F	12	59	1881	1589.1	57.7	175.2	16	219.2	59	64.4	-23.5	-28.6	3	1822	58.8	14	74.9	8	-25.7	1.6
BT1516SWRLCP09SWPU	2015	33	Khanty	10290	36	21	52	-1.1	40	F	13	45	1883.1	1549.4	78.7	210	11	1.5	45	24.7	-2.5	11.5	-2.3	1838.1	74.9	0	35.2	2.7	14.4	22.6
BT1516SWRLCP09SWPU	2015	33	Khanty	10290	36	21	52	-1.1	40	F	14	46	1907	1565	82.1	213.9	12	76.4	46	40.3	0.9	17.3	-4.2	1861	97.8	1	50.8	0.8	20.2	26
BT1516SWRLCP09SWPU	2015	33	Khanty	10290	36	21	52	-1.1	40	F	15	42	1908.2	1556.4	102.3	207.5	9	65.9	42	31.7	21.1	9.9	-3.2	1866.2	103	-3	42.2	1.8	12.8	46.2
BT1516SWRLCP09SWPU	2015	33	Khanty	10290	36	21	52	-1.1	40	F	16	99	1914.2	1506.3	101.2	207.7	36	197.5	99	-18.4	20	14.4	-7.5	1815.2	52	54	-7.9	-2.5	17.3	45.1
BT1516SWRLCP09SWPU	2015	33	Khanty	10290	36	21	52	-1.1	40	F	17	79	1914.6	1540.3	107.3	188	24	233.2	79	15.6	26.1	-9.4	-3.4	1835.6	72.4	34	26.1	1.6	-6.5	51.2
BT1516SWRLCP09SWPU	2015	33	Khanty	10290	36	21	52	-1.1	40	F	18	96	1919.9	1577.9	57.5	188.5	32	156.1	96	53.2	-23.7	-6.1	-6.2	1823.9	60.7	51	63.7	-1.2	-3.2	1.4
BT1516SWRLCP09SWPU	2015	33	Khanty	10290	36	21	52	-1.1	40	F	19	64	1926.9	1563.5	104.8	194.6	19	152	64	38.8	23.6	-5.7	-0.5	1862.9	99.7	19	49.3	4.5	-2.8	48.7
BT1516SWRLCP09SWPU	2015	33	Khanty	10290	36	21	52	-1.1	40	F	20	54	1933.8	1556.1	126.7	197	14	13.1	54	31.4	45.5	-4.5	0.7	1879.8	116.6	9	41.9	5.7	-1.6	70.6
BT1516SWRLCP09SWPU	2015	33	Khanty	10290	36	21	52	-1.1	40	F	21	84	1935.5	1566	77.4	208.1	28	146.7	84	41.3	-3.8	8.9	-1.6	1851.5	88.3	39	51.8	3.4	11.8	21.3
BT1516SWRLCP09SWPU	2015	33	Khanty	10290	36	21	52	-1.1	40	F	22	80	1939.9	1525.2	127	207.7	25	107.9	80	0.5	45.8	11.3	-4.4	1859.9	96.7	35	11	0.6	14.2	70.9
BT1516SWRLCP09SWPU	2015	33	Khanty	10290	36	21	52	-1.1	40	F	23	109	1940.9	1572.4	57.6	201.9	38	177	109	47.7	-23.6	4.8	-3.7	1831.9	68.7	64	58.2	1.3	7.7	1.5
BT1516SWRLCP09SWPU	2015	33	Khanty	10290	36	21	52	-1.1	40	F	24	96	1946.4	1610.3	33.5	206.6	33	113.2	96	85.6	-47.7	5.5	0.3	1850.4	87.2	51	96.1	5.3	8.4	-22.6
BT1516SWRLCP09SWPU	2015	33	Khanty	10290	36	21	52	-1.1	40	F	25	69	1951.7	1575.5	106.9	200.3	21	187	69	50.8	25.7	4.1	-4.6	1882.7	119.5	24	61.3	0.4	7	50.8
BT1516SWRLCP09SWPU	2015	33	Khanty	10290	36	21	52	-1.1	40	F	26	83	1953.4	1581.8	106.8	181.8	27	49.9	83	57.1	25.6	-19.8	0.8	1870.4	107.2	38	67.6	5.8	-16.9	50.7
BT1516SWRLCP09SWPU	2015	33	Khanty	10290	36	21	52	-1.1	40	F	27	109	1956.3	1594.3	58.4	194.6	39	134.2	109	69.6	-22.8	-10.7	4.5	1847.3	84.1	64	80.1	9.5	-7.8	2.3
BT1516SWRLCP09SWPU	2015	33	Khanty	10290	36	21	52	-1.1	40	F	28	61	1958.7	1544.5	156.8	196.4	18	159	61	19.8	75.6	-7.6	3.2	1897.7	134.5	16	30.3	8.2	-4.7	100.7
BT1516SWRLCP09SWPU	2015	33	Khanty	10290	36	21	52	-1.1	40	F	29	90	1962.8	1575.4	82.2	215.2	31	217.7	90	50.7	1	11.4	3	1872.8	109.6	45	61.2	8	14.3	26.1
BT1516SWRLCP09SWPU	2015	33	Khanty	10290	36	21	52	-1.1	40	F	30	60	1965.7	1564.2	126.7	214.8	17	74.3	60	39.5	45.5	13.3	0.7	1905.7	142.5	15	50	5.7	16.2	70.6
BT1516SWRLCH__SWPU	2015	35	Holmenkollen	10243	40	24	71	-1.4	77	F	2	38	1897.5	1595.5	93.9	170.1	5	116.1	18	10.9	52	-26.9	-5.7	1859.5	30.3	18	10.9	-5.7	-26.9	52
BT1516SWRLCH__SWPU	2015	35	Holmenkollen	10243	40	24	71	-1.4	77	F	11	38	1965.3	1564.1	166.2	197	4	0	18	-20.5	124.3	-22	16.3	1927.3	98.1	18	-20.5	16.3	-22	124.3
BT1516SWRLCH__SMPU	2015	35	Holmenkollen	10243	40	24	71	-1.4	77	F	17	0	1997.7	1582.2	214.2	201.3	1	203.7	-20	-2.4	172.3	1.7	-3.1	1997.7	168.5	-20	-2.4	-3.1	1.7	172.3
BT1516SWRLCH__SWPU	2015	35	Holmenkollen	10243	40	24	71	-1.4	77	F	1	20	1849.2	1584.6	41.9	202.7	3	57.3	0	0	0	0	0	1829.2	0	0	0	0	0	0
BT1516SWRLCH__SWPU	2015	35	Holmenkollen	10243	40	24	71	-1.4	77	F	3	15	1906.5	1585.7	119.5	186.3	2	148.5	-5	1.1	77.6	-12	-4.4	1891.5	62.3	-5	1.1	-4.4	-12	77.6
BT1516SWRLCH__SWPU	2015	35	Holmenkollen	10243	40	24	71	-1.4	77	F	4	51	1911	1589.5	66.2	204.3	10	100	31	4.9	24.3	-5	6.6	1860	30.8	31	4.9	6.6	-5	24.3
BT1516SWRLCH__SWPU	2015	35	Holmenkollen	10243	40	24	71	-1.4	77	F	5	68	1927.8	1602.8	67.7	189.3	16	218.1	48	18.2	25.8	-22.8	9.4	1859.8	30.6	48	18.2	9.4	-22.8	25.8
BT1516SWRLCH__SWPU	2015	35	Holmenkollen	10243	40	24	71	-1.4	77	F	6	65	1928.2	1601.8	42.1	219.3	14	118.8	45	17.2	0.2	10.5	6.1	1863.2	34	45	17.2	6.1	10.5	0.2
BT1516SWRLCH__SWPU	2015	35	Holmenkollen	10243	40	24	71	-1.4	77	F	7	49	1949.2	1553.8	141.4	205	9	112.5	29	-30.8	99.5	-8.6	10.9	1900.2	71	29	-30.8	10.9	-8.6	99.5
BT1516SWRLCH__SWPU	2015	35	Holmenkollen	10243	40	24	71	-1.4	77	F	8	46	1951.7	1589.3	122.6	193.8	7	258.1	26	4.7	80.7	-12.3	3.4	1905.7	76.5	26	4.7	3.4	-12.3	80.7
BT1516SWRLCH__SWPU	2015	35	Holmenkollen	10243	40	24	71	-1.4	77	F	9	96	1957.4	1607.7	64.6	189.1	31	323.8	76	23.1	22.7	-18.2	4.6	1861.4	32.2	76	23.1	4.6	-18.2	22.7
BT1516SWRLCH__SWPU	2015	35	Holmenkollen	10243	40	24	71	-1.4	77	F	10	48	1961.7	1562.5	141.6	209.6	8	102.5	28	-22.1	99.7	6	0.9	1913.7	84.5	28	-22.1	0.9	6	99.7
BT1516SWRLCH__SWPU	2015	35	Holmenkollen	10243	40	24	71	-1.4	77	F	12	54	1966.6	1579.6	140.5	192.5	12	134.2	34	-5	98.6	-11.9	1.7	1912.6	83.4	34	-5	1.7	-11.9	98.6
BT1516SWRLCH__SWPU	2015	35	Holmenkollen	10243	40	24	71	-1.4	77	F	13	80	1967.1	1612.3	89.7	185.1	20	170.6	60	27.7	47.8	-27.3	9.7	1887.1	57.9	60	27.7	9.7	-27.3	47.8
BT1516SWRLCH__SWPU	2015	35	Holmenkollen	10243	40	24	71	-1.4	77	F	14	55	1968	1643	100.2	169.8	13	117.4	35	58.4	58.3	-38.5	5.6	1913	83.8	35	58.4	5.6	-38.5	58.3
BT1516SWRLCH__SWPU	2015	35	Holmenkollen	10243	40	24	71	-1.4	77	F	15	88	1970.3	1620.5	66.2	195.6	26	170.6	68	35.9	24.3	-12.9	5.8	1882.3	53.1	68	35.9	5.8	-12.9	24.3
BT1516SWRLCH__SWPU	2015	35	Holmenkollen	10243	40	24	71	-1.4	77	F	16	53	1983.4	1588.7	146.3	195.4	11	61.8	33	4.1	104.4	-11.9	4.6	1930.4	101.2	33	4.1	4.6	-11.9	104.4
BT1516SWRLCH__SWPU	2015	35	Holmenkollen	10243	40	24	71	-1.4	77	F	18	104	2004.1	1600.8	112.5	186.8	33	292.9	84	16.2	70.6	-21	5.1	1900.1	70.9	84	16.2	5.1	-21	70.6
BT1516SWRLCH__SWPU	2015	35	Holmenkollen	10243	40	24	71	-1.4	77	F	19	117	2005.1	1590.2	115.7	182.2	42	324.8	97	5.6	73.8	-24.7	4.2	1888.1	58.9	97	5.6	4.2	-24.7	73.8
BT1516SWRLCH__SWPU	2015	35	Holmenkollen	10243	40	24	71	-1.4	77	F	20	68	2009.8	1644.8	125.4	171.6	17	78.6	48	60.2	83.5	-36.2	5.1	1941.8	112.6	48	60.2	5.1	-36.2	83.5
BT1516SWRLCH__SWPU	2015	35	Holmenkollen	10243	40	24	71	-1.4	77	F	21	80	2019.8	1632.6	122.6	184.6	19	223.2	60	48	80.7	-25.6	7.5	1939.8	110.6	60	48	7.5	-25.6	80.7
BT1516SWRLCH__SWPU	2015	35	Holmenkollen	10243	40	24	71	-1.4	77	F	22	87	2019.8	1604.3	118.2	210.3	25	191.2	67	19.7	76.3	1.6	6	1932.8	103.6	67	19.7	6	1.6	76.3
BT1516SWRLCH__SWPU	2015	35	Holmenkollen	10243	40	24	71	-1.4	77	F	23	134	2035.9	1610.3	95.6	196	49	256.8	114	25.7	53.7	-13.8	7.1	1901.9	72.7	114	25.7	7.1	-13.8	53.7
BT1516SWRLCH__SWPU	2015	35	Holmenkollen	10243	40	24	71	-1.4	77	F	24	105	2038	1614.7	126.1	192.2	35	268.2	85	30.1	84.2	-16.3	5.8	1933	103.8	85	30.1	5.8	-16.3	84.2
BT1516SWRLCH__SWPU	2015	35	Holmenkollen	10243	40	24	71	-1.4	77	F	25	87	2040.4	1633.8	120	199.6	24	360.4	67	49.2	78.1	-10.8	7.7	1953.4	124.2	67	49.2	7.7	-10.8	78.1
BT1516SWRLCH__SWPU	2015	35	Holmenkollen	10243	40	24	71	-1.4	77	F	26	89	2042.2	1624.1	122.6	206.5	28	219.7	69	39.5	80.7	1.5	2.3	1953.2	124	69	39.5	2.3	1.5	80.7
BT1516SWRLCH__SWPU	2015	35	Holmenkollen	10243	40	24	71	-1.4	77	F	27	94	2044.1	1614.9	149.3	185.9	29	193	74	30.3	107.4	-23.4	6.6	1950.1	120.9	74	30.3	6.6	-23.4	107.4
BT1516SWRLCH__SWPU	2015	35	Holmenkollen	10243	40	24	71	-1.4	77	F	28	145	2045.4	1667	71.7	161.7	58	390	125	82.4	29.8	-42.5	1.5	1900.4	71.2	125	82.4	1.5	-42.5	29.8
BT1516SWRLCH__SWPU	2015	35	Holmenkollen	10243	40	24	71	-1.4	77	F	29	119	2048.3	1629.1	95	205.2	44	361	99	44.5	53.1	-10.1	12.6	1929.3	100.1	99	44.5	12.6	-10.1	53.1
BT1516SWRLCH__SWPU	2015	35	Holmenkollen	10243	40	24	71	-1.4	77	F	30	139	2050.3	1616.3	94.7	200.3	55	373.4	119	31.7	52.8	-14	11.6	1911.3	82.1	119	31.7	11.6	-14	52.8
BT1415SWRLCP01SWPU	2014	37	Oestersund	10494	29	22	69	0.6	71	F	4	10	2170.1	1745	161.1	254	5	48.3	2	-14.4	52.1	27	1.7	2160.1	66.4	2	-14.4	1.7	27	52.1
BT1415SWRLCP01SMPU	2014	37	Oestersund	10494	29	22	69	0.6	71	F	6	0	2179.8	1770.4	208.5	200.9	1	298.6	-8	11	99.5	-25.6	1.2	2179.8	86.1	-8	11	1.2	-25.6	99.5
BT1415SWRLCP01SWPU	2014	37	Oestersund	10494	29	22	69	0.6	71	F	27	110	2297	1887.8	30.7	268.5	38	288.2	102	128.4	-78.3	37.5	5.7	2187	93.3	102	128.4	5.7	37.5	-78.3
BT1415SWRLCP01SWPU	2014	37	Oestersund	10494	29	22	69	0.6	71	F	28	83	2298.9	1793.5	216.3	206.1	24	132.4	75	34.1	107.3	-5.2	-14	2215.9	122.2	75	34.1	-14	-5.2	107.3
BT1415SWRLCP01SWPU	2014	37	Oestersund	10494	29	22	69	0.6	71	F	29	119	2311.4	1889.8	87.5	215.1	43	361.9	111	130.4	-21.5	-14.5	4.3	2192.4	98.7	111	130.4	4.3	-14.5	-21.5
BT1415SWRLCP01SWPU	2014	37	Oestersund	10494	29	22	69	0.6	71	F	30	87	2326.9	1812	194.8	233.1	27	286.7	79	52.6	85.8	1	6.8	2239.9	146.2	79	52.6	6.8	1	85.8
BT1415SWRLCP01SWPU	2014	37	Oestersund	10494	29	22	69	0.6	71	F	1	8	2101.7	1759.4	109	225.3	3	80.6	0	0	0	0	0	2093.7	0	0	0	0	0	0
BT1415SWRLCP01SWPU	2014	37	Oestersund	10494	29	22	69	0.6	71	F	2	26	2149.6	1771	136.6	216	6	68.4	18	11.6	27.6	-3.6	-5.7	2123.6	29.9	18	11.6	-5.7	-3.6	27.6
BT1415SWRLCP01SWPU	2014	37	Oestersund	10494	29	22	69	0.6	71	F	3	9	2150	1800	135.9	205.1	4	0	1	40.6	26.9	-22.2	2	2141	47.3	1	40.6	2	-22.2	26.9
BT1415SWRLCP01SWPU	2014	37	Oestersund	10494	29	22	69	0.6	71	F	5	43	2176	1834.2	84	214.8	7	47.9	35	74.8	-25	-12.9	2.4	2133	39.3	35	74.8	2.4	-12.9	-25
BT1415SWRLCP01SWPU	2014	37	Oestersund	10494	29	22	69	0.6	71	F	7	5	2182.3	1799.1	166.6	211.6	2	78.1	-3	39.7	57.6	-17.6	3.9	2177.3	83.6	-3	39.7	3.9	-17.6	57.6
BT1415SWRLCP01SWPU	2014	37	Oestersund	10494	29	22	69	0.6	71	F	8	68	2187.4	1815.3	85.5	218.6	11	249.9	60	55.9	-23.5	-11	4.3	2119.4	25.7	60	55.9	4.3	-11	-23.5
BT1415SWRLCP01SWPU	2014	37	Oestersund	10494	29	22	69	0.6	71	F	9	81	2191.7	1817	85.1	208.6	20	267.5	73	57.6	-23.9	-25.2	8.5	2110.7	17	73	57.6	8.5	-25.2	-23.9
BT1415SWRLCP01SWPU	2014	37	Oestersund	10494	29	22	69	0.6	71	F	10	47	2199.6	1815.2	109.2	228.2	9	100.8	39	55.8	0.2	5.2	-2.3	2152.6	58.9	39	55.8	-2.3	5.2	0.2
BT1415SWRLCP01SWPU	2014	37	Oestersund	10494	29	22	69	0.6	71	F	11	47	2202.5	1790.4	158.5	206.6	8	74.3	39	31	49.5	-6.7	-12	2155.5	61.8	39	31	-12	-6.7	49.5
BT1415SWRLCP01SWPU	2014	37	Oestersund	10494	29	22	69	0.6	71	F	12	79	2203.2	1800.2	108	216	18	116.8	71	40.8	-1	1.3	-10.6	2124.2	30.5	71	40.8	-10.6	1.3	-1
BT1415SWRLCP01SWPU	2014	37	Oestersund	10494	29	22	69	0.6	71	F	13	81	2205.6	1806.2	112.8	205.6	22	170.4	73	46.8	3.8	-20.4	0.7	2124.6	30.9	73	46.8	0.7	-20.4	3.8
BT1415SWRLCP01SWPU	2014	37	Oestersund	10494	29	22	69	0.6	71	F	14	70	2210	1804.3	134.4	201.3	12	85.7	62	44.9	25.4	-18.4	-5.6	2140	46.3	62	44.9	-5.6	-18.4	25.4
BT1415SWRLCP01SWPU	2014	37	Oestersund	10494	29	22	69	0.6	71	F	15	71	2211.2	1804.7	137.8	197.7	13	108.3	63	45.3	28.8	-24.3	-3.3	2140.2	46.5	63	45.3	-3.3	-24.3	28.8
BT1415SWRLCP01SWPU	2014	37	Oestersund	10494	29	22	69	0.6	71	F	16	101	2214.9	1826	85.4	202.5	35	158.9	93	66.6	-23.6	-24.2	1.4	2113.9	20.2	93	66.6	1.4	-24.2	-23.6
BT1415SWRLCP01SWPU	2014	37	Oestersund	10494	29	22	69	0.6	71	F	17	76	2218.5	1825.9	111.5	205.1	17	292.8	68	66.5	2.5	-15.6	-4.6	2142.5	48.8	68	66.5	-4.6	-15.6	2.5
BT1415SWRLCP01SWPU	2014	37	Oestersund	10494	29	22	69	0.6	71	F	18	83	2234.1	1814.8	106.1	230.2	23	103.9	75	55.4	-2.9	3	1.9	2151.1	57.4	75	55.4	1.9	3	-2.9
BT1415SWRLCP01SWPU	2014	37	Oestersund	10494	29	22	69	0.6	71	F	19	116	2251.8	1790.8	109.1	235.9	41	420.6	108	31.4	0.1	6.1	4.5	2135.8	42.1	108	31.4	4.5	6.1	0.1
BT1415SWRLCP01SWPU	2014	37	Oestersund	10494	29	22	69	0.6	71	F	20	100	2260.6	1847.5	109.9	203.2	34	257.7	92	88.1	0.9	-25.1	3	2160.6	66.9	92	88.1	3	-25.1	0.9
BT1415SWRLCP01SWPU	2014	37	Oestersund	10494	29	22	69	0.6	71	F	21	90	2265.6	1813.2	139.7	222.7	29	301.1	82	53.8	30.7	-1.2	-1.4	2175.6	81.9	82	53.8	-1.4	-1.2	30.7
BT1415SWRLCP01SWPU	2014	37	Oestersund	10494	29	22	69	0.6	71	F	22	81	2272.1	1851.5	113.7	225.9	21	90	73	92.1	4.7	8.6	-8	2191.1	97.4	73	92.1	-8	8.6	4.7
BT1415SWRLCP01SWPU	2014	37	Oestersund	10494	29	22	69	0.6	71	F	23	141	2275.5	1806.5	110.8	217.2	55	232.9	133	47.1	1.8	-12.3	4.2	2134.5	40.8	133	47.1	4.2	-12.3	1.8
BT1415SWRLCP01SWPU	2014	37	Oestersund	10494	29	22	69	0.6	71	F	24	94	2287	1830.7	138.9	223.4	31	274.9	86	71.3	29.9	-6.2	4.3	2193	99.3	86	71.3	4.3	-6.2	29.9
BT1415SWRLCP01SWPU	2014	37	Oestersund	10494	29	22	69	0.6	71	F	25	125	2294.7	1822	117.6	230.1	46	267.6	117	62.6	8.6	4.4	0.4	2169.7	76	117	62.6	0.4	4.4	8.6
BT1415SWRLCP01SWPU	2014	37	Oestersund	10494	29	22	69	0.6	71	F	26	72	2294.9	1848.8	144.3	229.8	15	229.6	64	89.4	35.3	-7.6	12.1	2222.9	129.2	64	89.4	12.1	-7.6	35.3
BT1415SWRLCP03SWPU	2014	41	Pokljuka	10365	39	31	77	1.6	82	F	2	55	1805.9	1496	50.1	204.8	15	200.4	16	-26.1	-1	17	4.1	1750.9	0	0	0	0	0	0
BT1415SWRLCP03SWPU	2014	41	Pokljuka	10365	39	31	77	1.6	82	F	22	115	1966.1	1596.5	51.2	203.4	48	233.3	76	74.4	0.1	32	-12.3	1851.1	100.2	60	100.5	-16.4	15	1.1
BT1415SWRLCP03SWPU	2014	41	Pokljuka	10365	39	31	77	1.6	82	F	23	60	1967.8	1646.4	77.2	184.2	17	172.9	21	124.3	26.1	-2	2.5	1907.8	156.9	5	150.4	-1.6	-19	27.1
BT1415SWRLCP03SWPU	2014	41	Pokljuka	10365	39	31	77	1.6	82	F	24	55	1968.8	1550.2	175.3	188.3	16	10	16	28.1	124.2	5	-0.4	1913.8	162.9	0	54.2	-4.5	-12	125.2
BT1415SWRLCP03SWPU	2014	41	Pokljuka	10365	39	31	77	1.6	82	F	1	39	1795.9	1522.1	51.1	183.7	6	159.8	0	0	0	0	0	1756.9	6	-16	26.1	-4.1	-17	1
BT1415SWRLCP03SWPU	2014	41	Pokljuka	10365	39	31	77	1.6	82	F	3	25	1832.7	1573.7	52.4	181.6	3	37.2	-14	51.6	1.3	3	-5.1	1807.7	56.8	-30	77.7	-9.2	-14	2.3
BT1415SWRLCP03SWPU	2014	41	Pokljuka	10365	39	31	77	1.6	82	F	4	18	1833.1	1565.2	75.4	174.5	2	159.6	-21	43.1	24.3	-9	-0.2	1815.1	64.2	-37	69.2	-4.3	-26	25.3
BT1415SWRLCP03SWPU	2014	41	Pokljuka	10365	39	31	77	1.6	82	F	5	43	1868	1577.6	51	196.4	9	113.1	4	55.5	-0.1	11	1.7	1825	74.1	-12	81.6	-2.4	-6	0.9
BT1415SWRLCP03SWPU	2014	41	Pokljuka	10365	39	31	77	1.6	82	F	6	65	1871.6	1561.3	23.4	221.9	22	124.3	26	39.2	-27.7	37	1.2	1806.6	55.7	10	65.3	-2.9	20	-26.7
BT1415SWRLCP03SWPU	2014	41	Pokljuka	10365	39	31	77	1.6	82	F	7	37	1876.6	1579.2	73	187.4	4	36.8	-2	57.1	21.9	4	-0.3	1839.6	88.7	-18	83.2	-4.4	-13	22.9
BT1415SWRLCP03SWPU	2014	41	Pokljuka	10365	39	31	77	1.6	82	F	8	44	1882.1	1557.7	93.9	186.5	10	72.1	5	35.6	42.8	7	-4.2	1838.1	87.2	-11	61.7	-8.3	-10	43.8
BT1415SWRLCP03SWPU	2014	41	Pokljuka	10365	39	31	77	1.6	82	F	9	91	1901.1	1565.8	49.2	195.1	35	173.1	52	43.7	-1.9	7	4.4	1810.1	59.2	36	69.8	0.3	-10	-0.9
BT1415SWRLCP03SWPU	2014	41	Pokljuka	10365	39	31	77	1.6	82	F	10	43	1909	1569.1	95.9	201	8	135.3	4	47	44.8	9	8.3	1866	115.1	-12	73.1	4.2	-8	45.8
BT1415SWRLCP03SWPU	2014	41	Pokljuka	10365	39	31	77	1.6	82	F	11	48	1911.5	1581.4	76.6	205.5	13	123.5	9	59.3	25.5	16	5.8	1863.5	112.6	-7	85.4	1.7	-1	26.5
BT1415SWRLCP03SWPU	2014	41	Pokljuka	10365	39	31	77	1.6	82	F	12	46	1919.4	1590.6	73.9	208.9	12	249.9	7	68.5	22.8	22	3.2	1873.4	122.5	-9	94.6	-0.9	5	23.8
BT1415SWRLCP03SWPU	2014	41	Pokljuka	10365	39	31	77	1.6	82	F	13	64	1920.2	1571.6	74.4	210.2	21	156.5	25	49.5	23.3	20	6.5	1856.2	105.3	9	75.6	2.4	3	24.3
BT1415SWRLCP03SWPU	2014	41	Pokljuka	10365	39	31	77	1.6	82	F	14	100	1925.4	1608.7	24.5	192.2	41	220.3	61	86.6	-26.6	0	8.5	1825.4	74.5	45	112.7	4.4	-17	-25.6
BT1415SWRLCP03SWPU	2014	41	Pokljuka	10365	39	31	77	1.6	82	F	15	42	1931.2	1590	118	181.2	7	0	3	67.9	66.9	-1	-1.5	1889.2	138.3	-13	94	-5.6	-18	67.9
BT1415SWRLCP03SWPU	2014	41	Pokljuka	10365	39	31	77	1.6	82	F	16	80	1931.4	1587.5	75.2	188.7	30	258.2	41	65.4	24.1	-7	12	1851.4	100.5	25	91.5	7.9	-24	25.1
BT1415SWRLCP03SWPU	2014	41	Pokljuka	10365	39	31	77	1.6	82	F	17	77	1937.1	1600.7	70.9	188.5	28	214.9	38	78.6	19.8	-3	7.8	1860.1	109.2	22	104.7	3.7	-20	20.8
BT1415SWRLCP03SWPU	2014	41	Pokljuka	10365	39	31	77	1.6	82	F	18	64	1952.4	1599.3	99.6	189.5	20	197.1	25	77.2	48.5	0	5.8	1888.4	137.5	9	103.3	1.7	-17	49.5
BT1415SWRLCP03SWPU	2014	41	Pokljuka	10365	39	31	77	1.6	82	F	19	98	1954.9	1567	100.6	189.3	39	215.8	59	44.9	49.5	-1	6.6	1856.9	106	43	71	2.5	-18	50.5
BT1415SWRLCP03SMPU	2014	41	Pokljuka	10365	39	31	77	1.6	82	F	20	0	1955.5	1605.1	148.3	202.1	1	291.8	-39	83	97.2	16	2.4	1955.5	204.6	-55	109.1	-1.7	-1	98.2
BT1415SWRLCP03SWPU	2014	41	Pokljuka	10365	39	31	77	1.6	82	F	21	39	1955.7	1638.1	80.4	198.2	5	80.7	0	116	29.3	13	1.5	1916.7	165.8	-16	142.1	-2.6	-4	30.3
BT1415SWRLCP03SWPU	2014	41	Pokljuka	10365	39	31	77	1.6	82	F	25	90	1969	1593.6	98.7	186.7	34	197.7	51	71.5	47.6	1	2	1879	128.1	35	97.6	-2.1	-16	48.6
BT1415SWRLCP03SWPU	2014	41	Pokljuka	10365	39	31	77	1.6	82	F	26	71	1985.5	1595.7	125.2	193.6	25	218.7	32	73.6	74.1	4	5.9	1914.5	163.6	16	99.7	1.8	-13	75.1
BT1415SWRLCP03SWPU	2014	41	Pokljuka	10365	39	31	77	1.6	82	F	27	101	1988.4	1590.7	100.4	196.3	42	129.5	62	68.6	49.3	9	3.6	1887.4	136.5	46	94.7	-0.5	-8	50.3
BT1415SWRLCP03SWPU	2014	41	Pokljuka	10365	39	31	77	1.6	82	F	28	63	1993	1568.7	146.4	214.9	19	399.4	24	46.6	95.3	29	2.2	1930	179.1	8	72.7	-1.9	12	96.3
BT1415SWRLCP03SWPU	2014	41	Pokljuka	10365	39	31	77	1.6	82	F	29	86	1993.6	1622.7	103	181.9	33	278	47	100.6	51.9	-5	3.2	1907.6	156.7	31	126.7	-0.9	-22	52.9
BT1415SWRLCP03SWPU	2014	41	Pokljuka	10365	39	31	77	1.6	82	F	30	54	1996.3	1564.3	169.7	208.3	14	115.6	15	42.2	118.6	21	3.6	1942.3	191.4	-1	68.3	-0.5	4	119.6
BT1415SWRLCP06SMPU	2014	43	Anterselva	10420	26	11	57	-0.3	43	F	1	0	1858.5	1591.6	63	203.9	1	388.7	0	0	0	0	0	1858.5	0	0	0	0	0	0
BT1415SWRLCP06SWPU	2014	43	Anterselva	10420	26	11	57	-0.3	43	F	23	90	2048	1663.5	82.5	212	22	190.6	90	71.9	19.5	-4	12.1	1958	99.5	90	71.9	12.1	-4	19.5
BT1415SWRLCP06SWPU	2014	43	Anterselva	10420	26	11	57	-0.3	43	F	28	70	2069.8	1634.7	126.2	238.9	7	89.3	70	43.1	63.2	29	6	1999.8	141.3	70	43.1	6	29	63.2
BT1415SWRLCP06SWPU	2014	43	Anterselva	10420	26	11	57	-0.3	43	F	2	74	1939.5	1601.4	58.6	205.5	11	145.1	74	9.8	-4.4	-5	6.6	1865.5	7	74	9.8	6.6	-5	-4.4
BT1415SWRLCP06SWPU	2014	43	Anterselva	10420	26	11	57	-0.3	43	F	3	27	1947.5	1552.6	149.7	218.2	2	0	27	-39	86.7	10	4.3	1920.5	62	27	-39	4.3	10	86.7
BT1415SWRLCP06SWPU	2014	43	Anterselva	10420	26	11	57	-0.3	43	F	4	61	1947.8	1596.1	59.6	231.1	6	123.1	61	4.5	-3.4	23	4.2	1886.8	28.3	61	4.5	4.2	23	-3.4
BT1415SWRLCP06SWPU	2014	43	Anterselva	10420	26	11	57	-0.3	43	F	5	86	1956.5	1576.9	77.7	215.9	19	133	86	-14.7	14.7	6	6	1870.5	12	86	-14.7	6	6	14.7
BT1415SWRLCP06SWPU	2014	43	Anterselva	10420	26	11	57	-0.3	43	F	6	70	1959.3	1602.2	58.7	228.4	8	211.3	70	10.6	-4.3	16	8.5	1889.3	30.8	70	10.6	8.5	16	-4.3
BT1415SWRLCP06SWPU	2014	43	Anterselva	10420	26	11	57	-0.3	43	F	7	55	1978.7	1633.4	83.6	206.7	4	140.5	55	41.8	20.6	-3	5.8	1923.7	65.2	55	41.8	5.8	-3	20.6
BT1415SWRLCP06SWPU	2014	43	Anterselva	10420	26	11	57	-0.3	43	F	8	58	1981.6	1612.6	99.9	211.1	5	120.2	58	21	36.9	0	7.2	1923.6	65.1	58	21	7.2	0	36.9
BT1415SWRLCP06SWPU	2014	43	Anterselva	10420	26	11	57	-0.3	43	F	9	71	1985.3	1615.6	103.7	195	9	100.8	71	24	40.7	-15	6.1	1914.3	55.8	71	24	6.1	-15	40.7
BT1415SWRLCP06SWPU	2014	43	Anterselva	10420	26	11	57	-0.3	43	F	10	85	1991.5	1611.5	82.3	212.7	18	140.2	85	19.9	19.3	0	8.8	1906.5	48	85	19.9	8.8	0	19.3
BT1415SWRLCP06SWPU	2014	43	Anterselva	10420	26	11	57	-0.3	43	F	11	78	1997.7	1606.4	107.3	206	14	273.4	78	14.8	44.3	-7	9.1	1919.7	61.2	78	14.8	9.1	-7	44.3
BT1415SWRLCP06SWPU	2014	43	Anterselva	10420	26	11	57	-0.3	43	F	12	84	1998.7	1594.8	103.3	216.6	17	162.2	84	3.2	40.3	7	5.7	1914.7	56.2	84	3.2	5.7	7	40.3
BT1415SWRLCP06SWPU	2014	43	Anterselva	10420	26	11	57	-0.3	43	F	13	50	1999	1639	82.9	227.1	3	89	50	47.4	19.9	16	7.2	1949	90.5	50	47.4	7.2	16	19.9
BT1415SWRLCP06SWPU	2014	43	Anterselva	10420	26	11	57	-0.3	43	F	14	71	2003.6	1632.3	106.8	193.5	10	126.8	71	40.7	43.8	-15	4.6	1932.6	74.1	71	40.7	4.6	-15	43.8
BT1415SWRLCP06SWPU	2014	43	Anterselva	10420	26	11	57	-0.3	43	F	15	80	2012.2	1627.1	108.3	196.8	15	139.2	80	35.5	45.3	-17	9.9	1932.2	73.7	80	35.5	9.9	-17	45.3
BT1415SWRLCP06SWPU	2014	43	Anterselva	10420	26	11	57	-0.3	43	F	16	100	2015.6	1614.8	85	215.8	25	311.9	100	23.2	22	1	10.9	1915.6	57.1	100	23.2	10.9	1	22
BT1415SWRLCP06SWPU	2014	43	Anterselva	10420	26	11	57	-0.3	43	F	17	123	2015.7	1640.7	59.7	192.3	36	214.4	123	49.1	-3.3	-16	4.4	1892.7	34.2	123	49.1	4.4	-16	-3.3
BT1415SWRLCP06SWPU	2014	43	Anterselva	10420	26	11	57	-0.3	43	F	18	87	2018.6	1624.4	106.2	201	20	98	87	32.8	43.2	-7	4.1	1931.6	73.1	87	32.8	4.1	-7	43.2
BT1415SWRLCP06SWPU	2014	43	Anterselva	10420	26	11	57	-0.3	43	F	19	82	2020.7	1604.9	129.2	204.6	16	153.7	82	13.3	66.2	-6	6.7	1938.7	80.2	82	13.3	6.7	-6	66.2
BT1415SWRLCP06SWPU	2014	43	Anterselva	10420	26	11	57	-0.3	43	F	20	108	2022.5	1649.2	59.1	206.2	30	208.2	108	57.6	-3.9	-1	3.3	1914.5	56	108	57.6	3.3	-1	-3.9
BT1415SWRLCP06SWPU	2014	43	Anterselva	10420	26	11	57	-0.3	43	F	21	92	2026.6	1639	80.7	214.9	23	189.5	92	47.4	17.7	7	4	1934.6	76.1	92	47.4	4	7	17.7
BT1415SWRLCP06SWPU	2014	43	Anterselva	10420	26	11	57	-0.3	43	F	22	116	2030.9	1621.5	84.1	209.3	33	320.5	116	29.9	21.1	5	0.4	1914.9	56.4	116	29.9	0.4	5	21.1
BT1415SWRLCP06SWPU	2014	43	Anterselva	10420	26	11	57	-0.3	43	F	24	88	2049.1	1584.8	169.5	206.8	21	160.1	88	-6.8	106.5	-4	6.9	1961.1	102.6	88	-6.8	6.9	-4	106.5
BT1415SWRLCP06SWPU	2014	43	Anterselva	10420	26	11	57	-0.3	43	F	25	109	2052.5	1626.9	103.6	213	31	164	109	35.3	40.6	7	2.1	1943.5	85	109	35.3	2.1	7	40.6
BT1415SWRLCP06SWPU	2014	43	Anterselva	10420	26	11	57	-0.3	43	F	26	108	2066.7	1693.9	58.5	206.3	29	228	108	102.3	-4.5	-5	7.4	1958.7	100.2	108	102.3	7.4	-5	-4.5
BT1415SWRLCP06SWPU	2014	43	Anterselva	10420	26	11	57	-0.3	43	F	27	130	2068.6	1680.5	64	194.1	42	225.3	130	88.9	1	-15	5.2	1938.6	80.1	130	88.9	5.2	-15	1
BT1415SWRLCP06SWPU	2014	43	Anterselva	10420	26	11	57	-0.3	43	F	29	127	2070.5	1646.7	87.7	209.1	40	301.2	127	55.1	24.7	-2	7.2	1943.5	85	127	55.1	7.2	-2	24.7
BT1415SWRLCP06SWPU	2014	43	Anterselva	10420	26	11	57	-0.3	43	F	30	119	2072.9	1652.6	89.1	212.2	34	172.4	119	61	26.1	-1	9.3	1953.9	95.4	119	61	9.3	-1	26.1
BT1415SWRLCP09SWPU	2014	47	Khanty	10290	36	21	52	2.2	68	F	1	16	1694.4	1418	53.8	206.6	3	15.7	0	0	0	0	0	1678.4	2.1	-18	-43.3	-2.4	24.1	23.7
BT1415SWRLCP09SWPU	2014	47	Khanty	10290	36	21	52	2.2	68	F	2	14	1710.1	1460.8	29.5	205.8	2	61.8	-2	42.8	-24.3	-2.7	1.9	1696.1	19.8	-20	-0.5	-0.5	21.4	-0.6
BT1415SWRLCP09SWPU	2014	47	Khanty	10290	36	21	52	2.2	68	F	3	34	1710.3	1461.3	30.1	184.9	6	129	18	43.3	-23.7	-24.1	2.4	1676.3	0	0	0	0	0	0
BT1415SWRLCP09SWPU	2014	47	Khanty	10290	36	21	52	2.2	68	F	6	68	1779.2	1460.9	54.7	195.6	9	150.1	52	42.9	0.9	7.7	-18.7	1711.2	34.9	34	-0.4	-21.1	31.8	24.6
BT1415SWRLCP09SMPU	2014	47	Khanty	10290	36	21	52	2.2	68	F	4	0	1756.2	1439.9	100.2	216.1	1	239.1	-16	21.9	46.4	5.2	4.3	1756.2	79.9	-34	-21.4	1.9	29.3	70.1
BT1415SWRLCP09SWPU	2014	47	Khanty	10290	36	21	52	2.2	68	F	5	18	1770.7	1457.6	101.1	194	4	0	2	39.6	47.3	-6	-6.6	1752.7	76.4	-16	-3.7	-9	18.1	71
BT1415SWRLCP09SWPU	2014	47	Khanty	10290	36	21	52	2.2	68	F	7	94	1816.1	1481.4	56	184.7	17	168.7	78	63.4	2.2	-22	0.1	1722.1	45.8	60	20.1	-2.3	2.1	25.9
BT1415SWRLCP09SWPU	2014	47	Khanty	10290	36	21	52	2.2	68	F	8	33	1823.4	1488.3	102.5	199.6	5	76.3	17	70.3	48.7	-3.4	-3.6	1790.4	114.1	-1	27	-6	20.7	72.4
BT1415SWRLCP09SWPU	2014	47	Khanty	10290	36	21	52	2.2	68	F	9	75	1827.1	1497.1	52.7	202.3	12	205.8	59	79.1	-1.1	6.7	-11	1752.1	75.8	41	35.8	-13.4	30.8	22.6
BT1415SWRLCP09SWPU	2014	47	Khanty	10290	36	21	52	2.2	68	F	10	74	1829.8	1455.6	101.2	199	10	84.8	58	37.6	47.4	-6	-1.6	1755.8	79.5	40	-5.7	-4	18.1	71.1
BT1415SWRLCP09SWPU	2014	47	Khanty	10290	36	21	52	2.2	68	F	11	106	1830.7	1441.9	78.1	204.7	22	216.8	90	23.9	24.3	7.2	-9.1	1724.7	48.4	72	-19.4	-11.5	31.3	48
BT1415SWRLCP09SWPU	2014	47	Khanty	10290	36	21	52	2.2	68	F	12	99	1832.1	1443.4	98.5	191.2	20	142.1	83	25.4	44.7	-18.8	3.4	1733.1	56.8	65	-17.9	1	5.3	68.4
BT1415SWRLCP09SWPU	2014	47	Khanty	10290	36	21	52	2.2	68	F	13	115	1833.3	1483.2	53.1	182	28	386.6	99	65.2	-0.7	-18.1	-6.5	1718.3	42	81	21.9	-8.9	6	23
BT1415SWRLCP09SWPU	2014	47	Khanty	10290	36	21	52	2.2	68	F	14	99	1836.5	1495.7	55.8	186	19	290.2	83	77.7	2	-16.8	-3.8	1737.5	61.2	65	34.4	-6.2	7.3	25.7
BT1415SWRLCP09SWPU	2014	47	Khanty	10290	36	21	52	2.2	68	F	15	60	1844.5	1524.1	82.9	177.5	8	151.2	44	106.1	29.1	-29.3	0.2	1784.5	108.2	26	62.8	-2.2	-5.2	52.8
BT1415SWRLCP09SWPU	2014	47	Khanty	10290	36	21	52	2.2	68	F	16	36	1845.6	1463	143.3	203.3	7	15.9	20	45	89.5	3.4	-6.7	1809.6	133.3	2	1.7	-9.1	27.5	113.2
BT1415SWRLCP09SWPU	2014	47	Khanty	10290	36	21	52	2.2	68	F	17	107	1846.5	1455.7	99	184.8	23	136.3	91	37.7	45.2	-15.6	-6.2	1739.5	63.2	73	-5.6	-8.6	8.5	68.9
BT1415SWRLCP09SWPU	2014	47	Khanty	10290	36	21	52	2.2	68	F	18	79	1848	1498.2	79.1	191.7	13	132.7	63	80.2	25.3	-9	-5.9	1769	92.7	45	36.9	-8.3	15.1	49
BT1415SWRLCP09SWPU	2014	47	Khanty	10290	36	21	52	2.2	68	F	19	93	1863.1	1476	103.7	190.4	16	294.6	77	58	49.9	-12.9	-3.3	1770.1	93.8	59	14.7	-5.7	11.2	73.6
BT1415SWRLCP09SWPU	2014	47	Khanty	10290	36	21	52	2.2	68	F	20	133	1864.7	1481.5	56.1	194.1	36	349.3	117	63.5	2.3	-16.4	3.9	1731.7	55.4	99	20.2	1.5	7.7	26
BT1415SWRLCP09SWPU	2014	47	Khanty	10290	36	21	52	2.2	68	F	21	109	1875.2	1506	79	181.2	25	362.5	93	88	25.2	-26.9	1.5	1766.2	89.9	75	44.7	-0.9	-2.8	48.9
BT1415SWRLCP09SWPU	2014	47	Khanty	10290	36	21	52	2.2	68	F	22	139	1890.5	1523.3	56.9	171.3	41	273	123	105.3	3.1	-39	3.7	1751.5	75.2	105	62	1.3	-14.9	26.8
BT1415SWRLCP09SWPU	2014	47	Khanty	10290	36	21	52	2.2	68	F	23	109	1893.2	1427.5	150	206.7	26	180.8	93	9.5	96.2	5.6	-5.5	1784.2	107.9	75	-33.8	-7.9	29.7	119.9
BT1415SWRLCP09SWPU	2014	47	Khanty	10290	36	21	52	2.2	68	F	24	172	1893.7	1474.7	28.5	218.5	56	430.6	156	56.7	-25.3	13.6	-1.7	1721.7	45.4	138	13.4	-4.1	37.7	-1.6
BT1415SWRLCP09SWPU	2014	47	Khanty	10290	36	21	52	2.2	68	F	25	149	1896.6	1505.6	55.4	186.6	44	283.1	133	87.6	1.6	-16.8	-3.2	1747.6	71.3	115	44.3	-5.6	7.3	25.3
BT1415SWRLCP09SWPU	2014	47	Khanty	10290	36	21	52	2.2	68	F	26	120	1898.1	1493.3	81.3	203.5	32	303.5	104	75.3	27.5	2.7	-5.8	1778.1	101.8	86	32	-8.2	26.8	51.2
BT1415SWRLCP09SWPU	2014	47	Khanty	10290	36	21	52	2.2	68	F	27	75	1900.2	1482.1	147.9	195.2	11	135.4	59	64.1	94.1	-6.4	-5	1825.2	148.9	41	20.8	-7.4	17.7	117.8
BT1415SWRLCP09SWPU	2014	47	Khanty	10290	36	21	52	2.2	68	F	28	135	1901.9	1499.1	75.7	192.1	39	303.6	119	81.1	21.9	-9.6	-4.9	1766.9	90.6	101	37.8	-7.3	14.5	45.6
BT1415SWRLCP09SWPU	2014	47	Khanty	10290	36	21	52	2.2	68	F	29	100	1911.2	1528.2	81.7	201.3	21	137.7	84	110.2	27.9	-7.5	2.2	1811.2	134.9	66	66.9	-0.2	16.6	51.6
BT1415SWRLCP09SWPU	2014	47	Khanty	10290	36	21	52	2.2	68	F	30	115	1926.5	1537.5	79.8	194.2	29	138.9	99	119.5	26	-9.8	-2.6	1811.5	135.2	81	76.2	-5	14.3	49.7
BT1415SWRLCH__SWPU	2014	49	Kontiolahti	10770	30	23	64	3.4	88	F	12	141	1895.7	1433.8	97.1	223.8	35	240.8	141	-60.2	-3.1	1.7	8.6	1754.7	0.5	23	-33.1	3.9	7.1	22.6
BT1415SWRLCH__SWPU	2014	49	Kontiolahti	10770	30	23	64	3.4	88	F	20	62	1965.8	1531.7	125	247.1	8	126.2	62	37.7	24.8	21.3	12.3	1903.8	149.6	-56	64.8	7.6	26.7	50.5
BT1415SWRLCH__SWPU	2014	49	Kontiolahti	10770	30	23	64	3.4	88	F	30	83	2024.8	1515.3	181.3	245.2	16	87.7	83	21.3	81.1	23.5	8.2	1941.8	187.6	-35	48.4	3.5	28.9	106.8
BT1415SWRLCH__SMPU	2014	49	Kontiolahti	10770	30	23	64	3.4	88	F	1	0	1807.7	1494	100.2	213.5	1	336.3	0	0	0	0	0	1807.7	53.5	-118	27.1	-4.7	5.4	25.7
BT1415SWRLCH__SWPU	2014	49	Kontiolahti	10770	30	23	64	3.4	88	F	2	29	1823	1493.8	79.1	221.1	4	143.8	29	-0.2	-21.1	3.1	4.5	1794	39.8	-89	26.9	-0.2	8.5	4.6
BT1415SWRLCH__SWPU	2014	49	Kontiolahti	10770	30	23	64	3.4	88	F	3	10	1839.3	1522.2	101.9	205.2	2	0	10	28.2	1.7	-10.2	1.9	1829.3	75.1	-108	55.3	-2.8	-4.8	27.4
BT1415SWRLCH__SWPU	2014	49	Kontiolahti	10770	30	23	64	3.4	88	F	4	49	1856.4	1562	33	212.4	6	72.2	49	68	-67.2	-16	14.9	1807.4	53.2	-69	95.1	10.2	-10.6	-41.5
BT1415SWRLCH__SWPU	2014	49	Kontiolahti	10770	30	23	64	3.4	88	F	5	100	1865.7	1501.2	52.2	212.3	18	164.4	100	7.2	-48	-5.9	4.7	1765.7	11.5	-18	34.3	0	-0.5	-22.3
BT1415SWRLCH__SWPU	2014	49	Kontiolahti	10770	30	23	64	3.4	88	F	6	70	1867.7	1506.5	78.9	212.3	10	86.5	70	12.5	-21.3	-11	9.8	1797.7	43.5	-48	39.6	5.1	-5.6	4.4
BT1415SWRLCH__SWPU	2014	49	Kontiolahti	10770	30	23	64	3.4	88	F	7	118	1872.2	1466.9	74.5	212.8	25	163.8	118	-27.1	-25.7	-5.4	4.7	1754.2	0	0	0	0	0	0
BT1415SWRLCH__SWPU	2014	49	Kontiolahti	10770	30	23	64	3.4	88	F	8	40	1879.9	1547.1	82.5	210.3	5	15.3	40	53.1	-17.7	-15.1	11.9	1839.9	85.7	-78	80.2	7.2	-9.7	8
BT1415SWRLCH__SWPU	2014	49	Kontiolahti	10770	30	23	64	3.4	88	F	9	106	1883.8	1515.9	53.1	208.8	20	138.3	106	21.9	-47.1	-10.5	5.8	1777.8	23.6	-12	49	1.1	-5.1	-21.4
BT1415SWRLCH__SWPU	2014	49	Kontiolahti	10770	30	23	64	3.4	88	F	10	63	1894.2	1544.1	79.2	207.9	9	158.1	63	50.1	-21	-9.6	4	1831.2	77	-55	77.2	-0.7	-4.2	4.7
BT1415SWRLCH__SWPU	2014	49	Kontiolahti	10770	30	23	64	3.4	88	F	11	83	1895.4	1481.6	125	205.8	15	93.2	83	-12.4	24.8	-12.7	5	1812.4	58.2	-35	14.7	0.3	-7.3	50.5
BT1415SWRLCH__SWPU	2014	49	Kontiolahti	10770	30	23	64	3.4	88	F	13	79	1900.9	1511	101.4	209.5	14	99.6	79	17	1.2	-11.6	7.6	1821.9	67.7	-39	44.1	2.9	-6.2	26.9
BT1415SWRLCH__SWPU	2014	49	Kontiolahti	10770	30	23	64	3.4	88	F	14	71	1903.6	1526.6	101.5	204.5	12	230.5	71	32.6	1.3	-16.4	7.4	1832.6	78.4	-47	59.7	2.7	-11	27
BT1415SWRLCH__SWPU	2014	49	Kontiolahti	10770	30	23	64	3.4	88	F	15	73	1907.3	1512.6	98.6	223.1	13	95.9	73	18.6	-1.6	6	3.6	1834.3	80.1	-45	45.7	-1.1	11.4	24.1
BT1415SWRLCH__SWPU	2014	49	Kontiolahti	10770	30	23	64	3.4	88	F	16	110	1907.9	1524.9	75.3	197.7	21	76.1	110	30.9	-24.9	-27.5	11.7	1797.9	43.7	-8	58	7	-22.1	0.8
BT1415SWRLCH__SWPU	2014	49	Kontiolahti	10770	30	23	64	3.4	88	F	17	52	1933.9	1533.1	130.6	218.2	7	48.7	52	39.1	30.4	-6.8	11.5	1881.9	127.7	-66	66.2	6.8	-1.4	56.1
BT1415SWRLCH__SWPU	2014	49	Kontiolahti	10770	30	23	64	3.4	88	F	18	103	1946	1511.5	122.6	208.9	19	58	103	17.5	22.4	-12.5	7.9	1843	88.8	-15	44.6	3.2	-7.1	48.1
BT1415SWRLCH__SWPU	2014	49	Kontiolahti	10770	30	23	64	3.4	88	F	19	20	1951.5	1545.1	176.1	210.3	3	31.6	20	51.1	75.9	-12.7	9.5	1931.5	177.3	-98	78.2	4.8	-7.3	101.6
BT1415SWRLCH__SWPU	2014	49	Kontiolahti	10770	30	23	64	3.4	88	F	21	122	1967.2	1555.3	81.1	208.8	26	64.5	122	61.3	-19.1	-8.9	4.2	1845.2	91	4	88.4	-0.5	-3.5	6.6
BT1415SWRLCH__SWPU	2014	49	Kontiolahti	10770	30	23	64	3.4	88	F	22	116	1971.5	1574.1	80.6	200.8	24	199.4	116	80.1	-19.6	-23.8	11.1	1855.5	101.3	-2	107.2	6.4	-18.4	6.1
BT1415SWRLCH__SWPU	2014	49	Kontiolahti	10770	30	23	64	3.4	88	F	23	99	1972.1	1579.4	102.4	191.3	17	217.1	99	85.4	2.2	-41.3	19.1	1873.1	118.9	-19	112.5	14.4	-35.9	27.9
BT1415SWRLCH__SWPU	2014	49	Kontiolahti	10770	30	23	64	3.4	88	F	24	112	1976.5	1512.1	130.3	222.1	22	100.2	112	18.1	30.1	-0.7	9.3	1864.5	110.3	-6	45.2	4.6	4.7	55.8
BT1415SWRLCH__SWPU	2014	49	Kontiolahti	10770	30	23	64	3.4	88	F	25	133	1979.2	1538.3	105.5	202.4	32	302.8	133	44.3	5.3	-10.9	-0.2	1846.2	92	15	71.4	-4.9	-5.5	31
BT1415SWRLCH__SWPU	2014	49	Kontiolahti	10770	30	23	64	3.4	88	F	26	147	2000.7	1553.6	110.3	189.8	37	213.2	147	59.6	10.1	-29.1	5.4	1853.7	99.5	29	86.7	0.7	-23.7	35.8
BT1415SWRLCH__SWPU	2014	49	Kontiolahti	10770	30	23	64	3.4	88	F	27	160	2004.9	1556	84.3	204.6	45	446.1	160	62	-15.9	-15.9	7	1844.9	90.7	42	89.1	2.3	-10.5	9.8
BT1415SWRLCH__SWPU	2014	49	Kontiolahti	10770	30	23	64	3.4	88	F	28	115	2007.1	1599.9	81.6	210.6	23	168.8	115	105.9	-18.6	-10.2	7.3	1892.1	137.9	-3	133	2.6	-4.8	7.1
BT1415SWRLCH__SWPU	2014	49	Kontiolahti	10770	30	23	64	3.4	88	F	29	145	2020.9	1497.7	151	227.2	36	88	145	3.7	50.8	4	9.7	1875.9	121.7	27	30.8	5	9.4	76.5
BT1314SWRLCP02SWPU	2013	51	Hochfilzen	10440	17	16	65	1	74	F	11	84	1884.7	1491	94.5	215.2	36	222.7	70	-47.3	37	14	-5.2	1800.7	9.4	44	-53.2	-2.9	2	63.5
BT1314SWRLCP02SWPU	2013	51	Hochfilzen	10440	17	16	65	1	74	F	1	14	1816.2	1538.3	57.5	206.4	6	11.5	0	0	0	0	0	1802.2	10.9	-26	-5.9	2.3	-12	26.5
BT1314SWRLCP02SWPU	2013	51	Hochfilzen	10440	17	16	65	1	74	F	2	10	1827.7	1576.9	31	209.8	5	90.2	-4	38.6	-26.5	10	-6.6	1817.7	26.4	-30	32.7	-4.3	-2	0
BT1314SWRLCP02SWPU	2013	51	Hochfilzen	10440	17	16	65	1	74	F	3	40	1831.3	1544.2	31	216.1	11	116.5	26	5.9	-26.5	12	-2.3	1791.3	0	0	0	0	0	0
BT1314SWRLCP02SWPU	2013	51	Hochfilzen	10440	17	16	65	1	74	F	4	1	1834.3	1570.1	58.2	205	2	75.4	-13	31.8	0.7	4	-5.4	1833.3	42	-39	25.9	-3.1	-8	27.2
BT1314SWRLCP02SWPU	2013	51	Hochfilzen	10440	17	16	65	1	74	F	5	2	1840.5	1561.7	56.5	220.3	3	18.1	-12	23.4	-1	16	-2.1	1838.5	47.2	-38	17.5	0.2	4	25.5
BT1314SWRLCP02SWPU	2013	51	Hochfilzen	10440	17	16	65	1	74	F	6	40	1848.1	1534.5	55.5	218.1	12	15.1	26	-3.8	-2	15	-3.3	1808.1	16.8	0	-9.7	-1	3	24.5
BT1314SWRLCP02SWPU	2013	51	Hochfilzen	10440	17	16	65	1	74	F	7	57	1878.7	1523.5	74.3	223.9	22	149.4	43	-14.8	16.8	22	-4.5	1821.7	30.4	17	-20.7	-2.2	10	43.3
BT1314SWRLCP02SWPU	2013	51	Hochfilzen	10440	17	16	65	1	74	F	8	61	1882.6	1556.3	53.7	211.6	24	67	47	18	-3.8	9	-3.8	1821.6	30.3	21	12.1	-1.5	-3	22.7
BT1314SWRLCP02SWPU	2013	51	Hochfilzen	10440	17	16	65	1	74	F	9	60	1883.2	1545.1	50.1	228	23	62.5	46	6.8	-7.4	29	-7.4	1823.2	31.9	20	0.9	-5.1	17	19.1
BT1314SWRLCP02SWPU	2013	51	Hochfilzen	10440	17	16	65	1	74	F	10	19	1883.4	1550.6	104.7	209.1	8	99.1	5	12.3	47.2	7	-4.3	1864.4	73.1	-21	6.4	-2	-5	73.7
BT1314SWRLCP02SWPU	2013	51	Hochfilzen	10440	17	16	65	1	74	F	12	54	1885.1	1533.9	98.7	198.5	20	72.1	40	-4.4	41.2	-3	-4.9	1831.1	39.8	14	-10.3	-2.6	-15	67.7
BT1314SWRLCP02SWPU	2013	51	Hochfilzen	10440	17	16	65	1	74	F	13	53	1888.3	1527.2	75	233.1	19	131.6	39	-11.1	17.5	29	-2.3	1835.3	44	13	-17	0	17	44
BT1314SWRLCP02SWPU	2013	51	Hochfilzen	10440	17	16	65	1	74	F	14	44	1889.2	1503.2	100.6	241.4	16	136.5	30	-35.1	43.1	40	-5	1845.2	53.9	4	-41	-2.7	28	69.6
BT1314SWRLCP02SMPU	2013	51	Hochfilzen	10440	17	16	65	1	74	F	15	0	1891.6	1547.3	126.6	217.7	1	109.8	-14	9	69.1	20	-8.7	1891.6	100.3	-40	3.1	-6.4	8	95.6
BT1314SWRLCP02SWPU	2013	51	Hochfilzen	10440	17	16	65	1	74	F	16	41	1893.7	1501.6	143.4	207.7	13	31.9	27	-36.7	85.9	4	-2.7	1852.7	61.4	1	-42.6	-0.4	-8	112.4
BT1314SWRLCP02SWPU	2013	51	Hochfilzen	10440	17	16	65	1	74	F	17	31	1897.2	1536.1	96.9	233.2	9	67.2	17	-2.2	39.4	31	-4.2	1866.2	74.9	-9	-8.1	-1.9	19	65.9
BT1314SWRLCP02SWPU	2013	51	Hochfilzen	10440	17	16	65	1	74	F	18	6	1906.4	1546.6	134.1	219.7	4	24.3	-8	8.3	76.6	14	-0.7	1900.4	109.1	-34	2.4	1.6	2	103.1
BT1314SWRLCP02SWPU	2013	51	Hochfilzen	10440	17	16	65	1	74	F	19	17	1915.3	1566.1	122.9	209.3	7	0	3	27.8	65.4	5	-2.1	1898.3	107	-23	21.9	0.2	-7	91.9
BT1314SWRLCP02SWPU	2013	51	Hochfilzen	10440	17	16	65	1	74	F	20	83	1922.7	1574.1	55.2	210.4	33	276.3	69	35.8	-2.3	8	-4	1839.7	48.4	43	29.9	-1.7	-4	24.2
BT1314SWRLCP02SWPU	2013	51	Hochfilzen	10440	17	16	65	1	74	F	21	33	1932.7	1562.2	126.6	210.9	10	81	19	23.9	69.1	10	-5.5	1899.7	108.4	-7	18	-3.2	-2	95.6
BT1314SWRLCP02SWPU	2013	51	Hochfilzen	10440	17	16	65	1	74	F	22	86	1940.1	1584.1	78.4	191.6	38	238	72	45.8	20.9	-13	-1.8	1854.1	62.8	46	39.9	0.5	-25	47.4
BT1314SWRLCP02SWPU	2013	51	Hochfilzen	10440	17	16	65	1	74	F	23	49	1947.8	1553.1	120.9	224.8	18	138.6	35	14.8	63.4	25	-6.6	1898.8	107.5	9	8.9	-4.3	13	89.9
BT1314SWRLCP02SWPU	2013	51	Hochfilzen	10440	17	16	65	1	74	F	24	93	1950.6	1541.1	96.8	219.7	43	150.7	79	2.8	39.3	20	-6.7	1857.6	66.3	53	-3.1	-4.4	8	65.8
BT1314SWRLCP02SWPU	2013	51	Hochfilzen	10440	17	16	65	1	74	F	25	43	1952.7	1565.6	106	238.1	15	147.3	29	27.3	48.5	31	0.7	1909.7	118.4	3	21.4	3	19	75
BT1314SWRLCP02SWPU	2013	51	Hochfilzen	10440	17	16	65	1	74	F	26	47	1954.8	1559	127.5	221.3	17	73	33	20.7	70	18	-3.1	1907.8	116.5	7	14.8	-0.8	6	96.5
BT1314SWRLCP02SWPU	2013	51	Hochfilzen	10440	17	16	65	1	74	F	27	87	1955.7	1589.4	52.5	226.8	40	177.2	73	51.1	-5	22	-1.6	1868.7	77.4	47	45.2	0.7	10	21.5
BT1314SWRLCP02SWPU	2013	51	Hochfilzen	10440	17	16	65	1	74	F	28	119	1956.3	1538.8	72.8	225.7	56	141	105	0.5	15.3	22	-2.7	1837.3	46	79	-5.4	-0.4	10	41.8
BT1314SWRLCP02SWPU	2013	51	Hochfilzen	10440	17	16	65	1	74	F	29	118	1957.2	1538.3	77.8	223.1	55	224.6	104	0	20.3	19	-2.3	1839.2	47.9	78	-5.9	0	7	46.8
BT1314SWRLCP02SWPU	2013	51	Hochfilzen	10440	17	16	65	1	74	F	30	43	1963.5	1574	122.5	224	14	77.5	29	35.7	65	25	-7.4	1920.5	129.2	3	29.8	-5.1	13	91.5
BT1314SWRLCP03SWPU	2013	53	Annecy	10320	25	20	64	1	59	F	1	12	1685.4	1432.4	43.5	197.5	3	87.6	0	0	0	0	0	1673.4	21.8	-26	-1.3	-3.5	3	23.6
BT1314SWRLCP03SWPU	2013	53	Annecy	10320	25	20	64	1	59	F	2	38	1689.6	1433.7	19.9	198	12	15.5	26	1.3	-23.6	-3	3.5	1651.6	0	0	0	0	0	0
BT1314SWRLCP03SWPU	2013	53	Annecy	10320	25	20	64	1	59	F	3	35	1700.9	1434.5	41.1	190.3	11	28.6	23	2.1	-2.4	-10	2.8	1665.9	14.3	-3	0.8	-0.7	-7	21.2
BT1314SWRLCP03SWPU	2013	53	Annecy	10320	25	20	64	1	59	F	4	13	1707.3	1439.9	43	211.4	4	0	1	7.5	-0.5	13	0.9	1694.3	42.7	-25	6.2	-2.6	16	23.1
BT1314SWRLCP03SWPU	2013	53	Annecy	10320	25	20	64	1	59	F	5	27	1714	1469	19.5	198.5	10	103.2	15	36.6	-24	-6	7	1687	35.4	-11	35.3	3.5	-3	-0.4
BT1314SWRLCP03SMPU	2013	53	Annecy	10320	25	20	64	1	59	F	6	0	1722.5	1455.7	64.6	202.2	1	151.2	-12	23.3	21.1	2	2.7	1722.5	70.9	-38	22	-0.8	5	44.7
BT1314SWRLCP03SWPU	2013	53	Annecy	10320	25	20	64	1	59	F	7	71	1725.7	1445	18.3	191.4	31	125.6	59	12.6	-25.2	-8	1.9	1654.7	3.1	33	11.3	-1.6	-5	-1.6
BT1314SWRLCP03SWPU	2013	53	Annecy	10320	25	20	64	1	59	F	8	50	1725.8	1432	39.6	204.2	21	211	38	-0.4	-3.9	3	3.7	1675.8	24.2	12	-1.7	0.2	6	19.7
BT1314SWRLCP03SWPU	2013	53	Annecy	10320	25	20	64	1	59	F	9	19	1742.2	1479.2	66.8	177.2	5	21.9	7	46.8	23.3	-18	-2.3	1723.2	71.6	-19	45.5	-5.8	-15	46.9
BT1314SWRLCP03SWPU	2013	53	Annecy	10320	25	20	64	1	59	F	10	26	1749.2	1448.7	85	189.5	8	90.1	14	16.3	41.5	-10	2	1723.2	71.6	-12	15	-1.5	-7	65.1
BT1314SWRLCP03SWPU	2013	53	Annecy	10320	25	20	64	1	59	F	11	25	1750.2	1459.8	85.1	180.3	6	56.8	13	27.4	41.6	-24	6.8	1725.2	73.6	-13	26.1	3.3	-21	65.2
BT1314SWRLCP03SWPU	2013	53	Annecy	10320	25	20	64	1	59	F	12	40	1752.9	1486.4	44.7	181.8	14	142.8	28	54	1.2	-21	5.3	1712.9	61.3	2	52.7	1.8	-18	24.8
BT1314SWRLCP03SWPU	2013	53	Annecy	10320	25	20	64	1	59	F	13	68	1763.2	1472.5	42.5	180.2	28	344.1	56	40.1	-1	-21	3.7	1695.2	43.6	30	38.8	0.2	-18	22.6
BT1314SWRLCP03SWPU	2013	53	Annecy	10320	25	20	64	1	59	F	14	40	1763.7	1465.1	65.1	193.5	15	67.5	28	32.7	21.6	-8	4	1723.7	72.1	2	31.4	0.5	-5	45.2
BT1314SWRLCP03SWPU	2013	53	Annecy	10320	25	20	64	1	59	F	15	8	1773	1436.6	110.5	217.9	2	37.1	-4	4.2	67	14	6.4	1765	113.4	-30	2.9	2.9	17	90.6
BT1314SWRLCP03SWPU	2013	53	Annecy	10320	25	20	64	1	59	F	16	25	1775.5	1457.7	87.7	205.1	7	64.8	13	25.3	44.2	1	6.6	1750.5	98.9	-13	24	3.1	4	67.8
BT1314SWRLCP03SWPU	2013	53	Annecy	10320	25	20	64	1	59	F	17	41	1779.4	1424	129.5	184.9	16	78.3	29	-8.4	86	-21	8.4	1738.4	86.8	3	-9.7	4.9	-18	109.6
BT1314SWRLCP03SWPU	2013	53	Annecy	10320	25	20	64	1	59	F	18	27	1788.6	1480.2	91.1	190.3	9	63.8	15	47.8	47.6	-14	6.8	1761.6	110	-11	46.5	3.3	-11	71.2
BT1314SWRLCP03SWPU	2013	53	Annecy	10320	25	20	64	1	59	F	19	61	1792.9	1457	84.8	190.1	26	147.3	49	24.6	41.3	-7	-0.4	1731.9	80.3	23	23.3	-3.9	-4	64.9
BT1314SWRLCP03SWPU	2013	53	Annecy	10320	25	20	64	1	59	F	20	55	1794	1448	102.6	188.4	22	40.4	43	15.6	59.1	-17	7.9	1739	87.4	17	14.3	4.4	-14	82.7
BT1314SWRLCP03SWPU	2013	53	Annecy	10320	25	20	64	1	59	F	21	95	1801.5	1467.3	41.4	197.8	46	272.8	83	34.9	-2.1	-3	3.3	1706.5	54.9	57	33.6	-0.2	0	21.5
BT1314SWRLCP03SWPU	2013	53	Annecy	10320	25	20	64	1	59	F	22	91	1802.6	1430.6	87.5	193.5	43	156.7	79	-1.8	44	-15	11	1711.6	60	53	-3.1	7.5	-12	67.6
BT1314SWRLCP03SWPU	2013	53	Annecy	10320	25	20	64	1	59	F	23	58	1803	1465.2	84	195.8	24	123.5	46	32.8	40.5	-2	0.3	1745	93.4	20	31.5	-3.2	1	64.1
BT1314SWRLCP03SWPU	2013	53	Annecy	10320	25	20	64	1	59	F	24	56	1808.9	1464.1	84.2	204.6	23	108.6	44	31.7	40.7	1	6.1	1752.9	101.3	18	30.4	2.6	4	64.3
BT1314SWRLCP03SWPU	2013	53	Annecy	10320	25	20	64	1	59	F	25	96	1810.2	1470.1	45.3	198.8	47	116.1	84	37.7	1.8	-10	11.3	1714.2	62.6	58	36.4	7.8	-7	25.4
BT1314SWRLCP03SWPU	2013	53	Annecy	10320	25	20	64	1	59	F	26	70	1811	1513.7	19.5	207.8	30	149.2	58	81.3	-24	4	6.3	1741	89.4	32	80	2.8	7	-0.4
BT1314SWRLCP03SWPU	2013	53	Annecy	10320	25	20	64	1	59	F	27	72	1824.7	1468.1	111	173.6	32	40.3	60	35.7	67.5	-26	2.1	1752.7	101.1	34	34.4	-1.4	-23	91.1
BT1314SWRLCP03SWPU	2013	53	Annecy	10320	25	20	64	1	59	F	28	80	1826.4	1481.5	64.8	200.1	35	373.3	68	49.1	21.3	-5	7.6	1746.4	94.8	42	47.8	4.1	-2	44.9
BT1314SWRLCP03SWPU	2013	53	Annecy	10320	25	20	64	1	59	F	29	42	1826.6	1456.7	136.1	191.8	17	94	30	24.3	92.6	-14	8.3	1784.6	133	4	23	4.8	-11	116.2
BT1314SWRLCP03SWPU	2013	53	Annecy	10320	25	20	64	1	59	F	30	49	1826.6	1508.1	65.2	204.3	18	141.2	37	75.7	21.7	-1	7.8	1777.6	126	11	74.4	4.3	2	45.3
BT1314SWRLCP04SWPU	2013	55	Oberhof	10400	36	36	64	5.5	65	F	15	96	2170.7	1770.1	93.3	211.3	11	154.3	96	71.3	5.2	-28	10.4	2074.7	102.2	-19	76.2	7.4	-6	24.6
BT1314SWRLCP04SWPU	2013	55	Oberhof	10400	36	36	64	5.5	65	F	22	112	2223.3	1767.4	116	227.9	19	189.8	112	68.6	27.9	4	-5	2111.3	138.8	-3	73.5	-8	26	47.3
BT1314SWRLCP04SWPU	2013	55	Oberhof	10400	36	36	64	5.5	65	F	23	134	2227.5	1823.8	41.8	227.9	27	146.6	134	125	-46.3	4	-5	2093.5	121	19	129.9	-8	26	-26.9
BT1314SWRLCP04SMPU	2013	55	Oberhof	10400	36	36	64	5.5	65	F	1	0	2015.8	1698.8	88.1	228.9	1	244.9	0	0	0	0	0	2015.8	43.3	-115	4.9	-3	22	19.4
BT1314SWRLCP04SWPU	2013	55	Oberhof	10400	36	36	64	5.5	65	F	2	30	2050.4	1695.2	93	232.2	2	0	30	-3.6	4.9	-2	5.3	2020.4	47.9	-85	1.3	2.3	20	24.3
BT1314SWRLCP04SWPU	2013	55	Oberhof	10400	36	36	64	5.5	65	F	3	115	2087.5	1693.9	68.7	209.9	21	207.5	115	-4.9	-19.4	-22	3	1972.5	0	0	0	0	0	0
BT1314SWRLCP04SWPU	2013	55	Oberhof	10400	36	36	64	5.5	65	F	4	62	2102.1	1747	70.5	222.6	4	125.4	62	48.2	-17.6	-7	0.7	2040.1	67.6	-53	53.1	-2.3	15	1.8
BT1314SWRLCP04SWPU	2013	55	Oberhof	10400	36	36	64	5.5	65	F	5	103	2114	1758.9	44.3	207.8	15	240.3	103	60.1	-43.8	-22	0.9	2011	38.5	-12	65	-2.1	0	-24.4
BT1314SWRLCP04SWPU	2013	55	Oberhof	10400	36	36	64	5.5	65	F	6	70	2130.5	1738.2	89.8	232.5	5	86.3	70	39.4	1.7	-2	5.6	2060.5	88	-45	44.3	2.6	20	21.1
BT1314SWRLCP04SWPU	2013	55	Oberhof	10400	36	36	64	5.5	65	F	7	77	2135.6	1709.9	132	216.7	7	131.5	77	11.1	43.9	-17	4.8	2058.6	86.1	-38	16	1.8	5	63.3
BT1314SWRLCP04SWPU	2013	55	Oberhof	10400	36	36	64	5.5	65	F	8	36	2141.2	1788.9	93.6	222.7	3	34.6	36	90.1	5.5	-10	3.8	2105.2	132.7	-79	95	0.8	12	24.9
BT1314SWRLCP04SWPU	2013	55	Oberhof	10400	36	36	64	5.5	65	F	9	72	2147.3	1738	120.1	217.2	6	114.7	72	39.2	32	-15	3.3	2075.3	102.8	-43	44.1	0.3	7	51.4
BT1314SWRLCP04SWPU	2013	55	Oberhof	10400	36	36	64	5.5	65	F	10	80	2150.8	1753.8	89.7	227.3	8	119.8	80	55	1.6	-2	0.4	2070.8	98.3	-35	59.9	-2.6	20	21
BT1314SWRLCP04SWPU	2013	55	Oberhof	10400	36	36	64	5.5	65	F	11	99	2157.9	1767.1	67.9	223.9	13	184.4	99	68.3	-20.2	-10	5	2058.9	86.4	-16	73.2	2	12	-0.8
BT1314SWRLCP04SWPU	2013	55	Oberhof	10400	36	36	64	5.5	65	F	12	130	2162.4	1740.2	69.1	223.1	26	239.4	130	41.4	-19	-8	2.2	2032.4	59.9	15	46.3	-0.8	14	0.4
BT1314SWRLCP04SWPU	2013	55	Oberhof	10400	36	36	64	5.5	65	F	13	120	2162.8	1686.9	135.4	220.5	22	71.7	120	-11.9	47.3	-10	1.6	2042.8	70.3	5	-7	-1.4	12	66.7
BT1314SWRLCP04SWPU	2013	55	Oberhof	10400	36	36	64	5.5	65	F	14	89	2170.1	1729.3	140.5	211.3	10	206.9	89	30.5	52.4	-20	2.4	2081.1	108.6	-26	35.4	-0.6	2	71.8
BT1314SWRLCP04SWPU	2013	55	Oberhof	10400	36	36	64	5.5	65	F	16	153	2172.3	1735.5	66.6	217.2	37	231.2	153	36.7	-21.5	-13	1.3	2019.3	46.8	38	41.6	-1.7	9	-2.1
BT1314SWRLCP04SWPU	2013	55	Oberhof	10400	36	36	64	5.5	65	F	17	123	2184.9	1735.4	94.8	231.7	23	147	123	36.6	6.7	0	2.8	2061.9	89.4	8	41.5	-0.2	22	26.1
BT1314SWRLCP04SWPU	2013	55	Oberhof	10400	36	36	64	5.5	65	F	18	166	2193.8	1704.5	90.4	232.9	42	378.7	166	5.7	2.3	4	0	2027.8	55.3	51	10.6	-3	26	21.7
BT1314SWRLCP04SWPU	2013	55	Oberhof	10400	36	36	64	5.5	65	F	19	97	2200.2	1782.2	94.6	226.4	12	154.9	97	83.4	6.5	-5	2.5	2103.2	130.7	-18	88.3	-0.5	17	25.9
BT1314SWRLCP04SWPU	2013	55	Oberhof	10400	36	36	64	5.5	65	F	20	105	2205.6	1757.6	115.7	227.3	18	316.7	105	58.8	27.6	-11	9.4	2100.6	128.1	-10	63.7	6.4	11	47
BT1314SWRLCP04SWPU	2013	55	Oberhof	10400	36	36	64	5.5	65	F	21	86	2222.7	1809.5	117.2	210	9	135	86	110.7	29.1	-21	2.1	2136.7	164.2	-29	115.6	-0.9	1	48.5
BT1314SWRLCP04SWPU	2013	55	Oberhof	10400	36	36	64	5.5	65	F	24	140	2236.3	1748.9	122	225.4	32	229.8	140	50.1	33.9	-3	-0.5	2096.3	123.8	25	55	-3.5	19	53.3
BT1314SWRLCP04SWPU	2013	55	Oberhof	10400	36	36	64	5.5	65	F	25	178	2238.9	1730.3	116.1	214.5	46	451.5	178	31.5	28	-20	5.6	2060.9	88.4	63	36.4	2.6	2	47.4
BT1314SWRLCP04SWPU	2013	55	Oberhof	10400	36	36	64	5.5	65	F	26	139	2245.6	1783.5	94.9	228.2	31	391.6	139	84.7	6.8	-3	2.3	2106.6	134.1	24	89.6	-0.7	19	26.2
BT1314SWRLCP04SWPU	2013	55	Oberhof	10400	36	36	64	5.5	65	F	27	150	2247	1728	118.7	250.3	36	311.3	150	29.2	30.6	20	1.4	2097	124.5	35	34.1	-1.6	42	50
BT1314SWRLCP04SWPU	2013	55	Oberhof	10400	36	36	64	5.5	65	F	28	136	2249	1802.9	69.2	240.9	29	268.3	136	104.1	-18.9	8	4	2113	140.5	21	109	1	30	0.5
BT1314SWRLCP04SWPU	2013	55	Oberhof	10400	36	36	64	5.5	65	F	29	161	2249.2	1795.3	69.4	223.5	40	238.1	161	96.5	-18.7	-8	2.6	2088.2	115.7	46	101.4	-0.4	14	0.7
BT1314SWRLCP04SWPU	2013	55	Oberhof	10400	36	36	64	5.5	65	F	30	201	2252.9	1749.1	91.3	211.5	54	569.7	201	50.3	3.2	-22	4.6	2051.9	79.4	86	55.2	1.6	0	22.6
BT1314SWRLCP05SWPU	2013	57	Ruhpolding	10450	26	18	64	3.9	82	F	26	47	2004.8	1572.6	180.3	204.9	11	38.9	47	-32.6	157.2	-12	5.4	1957.8	141.9	-37	-0.5	5	0	137.4
BT1314SWRLCP05SMPU	2013	57	Ruhpolding	10450	26	18	64	3.9	82	F	1	0	1839.8	1605.2	23.1	211.5	1	288.7	0	0	0	0	0	1839.8	23.9	-84	32.1	-0.4	12	-19.8
BT1314SWRLCP05SWPU	2013	57	Ruhpolding	10450	26	18	64	3.9	82	F	2	32	1849.5	1563.4	46	208.1	5	98	32	-41.8	22.9	-10	6.6	1817.5	1.6	-52	-9.7	6.2	2	3.1
BT1314SWRLCP05SWPU	2013	57	Ruhpolding	10450	26	18	64	3.9	82	F	3	45	1878.7	1529.5	90.5	213.7	10	137.7	45	-75.7	67.4	1	1.2	1833.7	17.8	-39	-43.6	0.8	13	47.6
BT1314SWRLCP05SWPU	2013	57	Ruhpolding	10450	26	18	64	3.9	82	F	4	63	1884.5	1595.2	44.5	181.8	16	135.7	63	-10	21.4	-31	1.3	1821.5	5.6	-21	22.1	0.9	-19	1.6
BT1314SWRLCP05SWPU	2013	57	Ruhpolding	10450	26	18	64	3.9	82	F	5	19	1885.1	1625	47.8	193.3	3	78.5	19	19.8	24.7	-23	4.8	1866.1	50.2	-65	51.9	4.4	-11	4.9
BT1314SWRLCP05SWPU	2013	57	Ruhpolding	10450	26	18	64	3.9	82	F	6	33	1887.9	1608.6	47	199.3	6	9.7	33	3.4	23.9	-13	0.8	1854.9	39	-51	35.5	0.4	-1	4.1
BT1314SWRLCP05SWPU	2013	57	Ruhpolding	10450	26	18	64	3.9	82	F	7	84	1899.9	1573.1	42.9	199.9	25	226.4	84	-32.1	19.8	-12	0.4	1815.9	0	0	0	0	0	0
BT1314SWRLCP05SWPU	2013	57	Ruhpolding	10450	26	18	64	3.9	82	F	8	38	1909.5	1602.9	71.2	197.4	8	73.4	38	-2.3	48.1	-17	2.9	1871.5	55.6	-46	29.8	2.5	-5	28.3
BT1314SWRLCP05SWPU	2013	57	Ruhpolding	10450	26	18	64	3.9	82	F	9	33	1913.2	1644.7	21.9	213.6	7	48.1	33	39.5	-1.2	-3	5.1	1880.2	64.3	-51	71.6	4.7	9	-21
BT1314SWRLCP05SWPU	2013	57	Ruhpolding	10450	26	18	64	3.9	82	F	10	69	1916.7	1636.4	21.5	189.8	21	145.3	69	31.2	-1.6	-28	6.3	1847.7	31.8	-15	63.3	5.9	-16	-21.4
BT1314SWRLCP05SWPU	2013	57	Ruhpolding	10450	26	18	64	3.9	82	F	11	87	1918.2	1557.8	64.4	209	29	134.1	87	-47.4	41.3	-3	0.5	1831.2	15.3	3	-15.3	0.1	9	21.5
BT1314SWRLCP05SWPU	2013	57	Ruhpolding	10450	26	18	64	3.9	82	F	12	17	1918.3	1556.3	133	212	2	0	17	-48.9	109.9	-3	3.5	1901.3	85.4	-67	-16.8	3.1	9	90.1
BT1314SWRLCP05SWPU	2013	57	Ruhpolding	10450	26	18	64	3.9	82	F	13	26	1937.8	1610.6	94.7	206.5	4	45.3	26	5.4	71.6	-12	7	1911.8	95.9	-58	37.5	6.6	0	51.8
BT1314SWRLCP05SWPU	2013	57	Ruhpolding	10450	26	18	64	3.9	82	F	14	64	1942.4	1633.3	43.6	201.5	17	44.7	64	28.1	20.5	-11	1	1878.4	62.5	-20	60.2	0.6	1	0.7
BT1314SWRLCP05SWPU	2013	57	Ruhpolding	10450	26	18	64	3.9	82	F	15	76	1948.3	1610.3	68.4	193.6	23	186.3	76	5.1	45.3	-19	1.1	1872.3	56.4	-8	37.2	0.7	-7	25.5
BT1314SWRLCP05SWPU	2013	57	Ruhpolding	10450	26	18	64	3.9	82	F	16	66	1955.1	1586.6	90.6	211.9	19	116.3	66	-18.6	67.5	-4	4.4	1889.1	73.2	-18	13.5	4	8	47.7
BT1314SWRLCP05SWPU	2013	57	Ruhpolding	10450	26	18	64	3.9	82	F	17	65	1956.1	1611.4	91.4	188.3	18	102.6	65	6.2	68.3	-23	-0.2	1891.1	75.2	-19	38.3	-0.6	-11	48.5
BT1314SWRLCP05SWPU	2013	57	Ruhpolding	10450	26	18	64	3.9	82	F	18	59	1960.3	1642	47.3	212	14	147.8	59	36.8	24.2	-10	10.5	1901.3	85.4	-25	68.9	10.1	2	4.4
BT1314SWRLCP05SWPU	2013	57	Ruhpolding	10450	26	18	64	3.9	82	F	19	87	1973.9	1594	91.4	201.5	28	205.6	87	-11.2	68.3	-11	1	1886.9	71	3	20.9	0.6	1	48.5
BT1314SWRLCP05SWPU	2013	57	Ruhpolding	10450	26	18	64	3.9	82	F	20	63	1975.5	1656.3	68.9	187.3	15	120.5	63	51.1	45.8	-32	7.8	1912.5	96.6	-21	83.2	7.4	-20	26
BT1314SWRLCP05SWPU	2013	57	Ruhpolding	10450	26	18	64	3.9	82	F	21	39	1977.5	1665.9	68.6	204	9	69.7	39	60.7	45.5	-11	3.5	1938.5	122.6	-45	92.8	3.1	1	25.7
BT1314SWRLCP05SWPU	2013	57	Ruhpolding	10450	26	18	64	3.9	82	F	22	116	1980.3	1580.4	89.8	194.1	40	286.9	116	-24.8	66.7	-23	5.6	1864.3	48.4	32	7.3	5.2	-11	46.9
BT1314SWRLCP05SWPU	2013	57	Ruhpolding	10450	26	18	64	3.9	82	F	23	68	1985.1	1602	112.2	202.9	20	115.3	68	-3.2	89.1	-10	1.4	1917.1	101.2	-16	28.9	1	2	69.3
BT1314SWRLCP05SWPU	2013	57	Ruhpolding	10450	26	18	64	3.9	82	F	24	58	1987.6	1656.7	68.9	204	13	165	58	51.5	45.8	-16	8.5	1929.6	113.7	-26	83.6	8.1	-4	26
BT1314SWRLCP05SWPU	2013	57	Ruhpolding	10450	26	18	64	3.9	82	F	25	125	1995.9	1622.5	48.8	199.6	48	329.1	125	17.3	25.7	-18	6.1	1870.9	55	41	49.4	5.7	-6	5.9
BT1314SWRLCP05SWPU	2013	57	Ruhpolding	10450	26	18	64	3.9	82	F	27	107	2011.1	1651.6	48.3	204.2	37	226	107	46.4	25.2	-16	8.7	1904.1	88.2	23	78.5	8.3	-4	5.4
BT1314SWRLCP05SWPU	2013	57	Ruhpolding	10450	26	18	64	3.9	82	F	28	131	2014.1	1622.4	71	189.7	52	242.4	131	17.2	47.9	-27	5.2	1883.1	67.2	47	49.3	4.8	-15	28.1
BT1314SWRLCP05SWPU	2013	57	Ruhpolding	10450	26	18	64	3.9	82	F	29	74	2026.1	1635.2	117.3	199.6	22	76.9	74	30	94.2	-13	1.1	1952.1	136.2	-10	62.1	0.7	-1	74.4
BT1314SWRLCP05SWPU	2013	57	Ruhpolding	10450	26	18	64	3.9	82	F	30	119	2030.3	1621.3	73.4	216.6	44	376.4	119	16.1	50.3	-1	6.1	1911.3	95.4	35	48.2	5.7	11	30.5
BT1314SWRLCP06SWPU	2013	59	Anterselva	10695	26	11	57	2.3	81	F	5	10	1895.2	1548.9	131.6	204.7	3	0	3	-49.7	89.1	-5	-6.7	1885.2	52.9	-30	-10.5	-9	25	47.4
BT1314SWRLCP06SMPU	2013	59	Anterselva	10695	26	11	57	2.3	81	F	11	0	1954.8	1597.5	134.8	222.5	1	244.1	-7	-1.1	92.3	10	-3.9	1954.8	122.5	-40	38.1	-6.2	40	50.6
BT1314SWRLCP06SWPU	2013	59	Anterselva	10695	26	11	57	2.3	81	F	29	48	2039.6	1580.2	203.6	207.8	19	223.9	41	-18.4	161.1	-12	3.4	1991.6	159.3	8	20.8	1.1	18	119.4
BT1314SWRLCP06SWPU	2013	59	Anterselva	10695	26	11	57	2.3	81	F	1	7	1864.5	1598.6	42.5	216.4	2	90.3	0	0	0	0	0	1857.5	25.2	-33	39.2	-2.3	30	-41.7
BT1314SWRLCP06SWPU	2013	59	Anterselva	10695	26	11	57	2.3	81	F	2	24	1866.1	1570.8	40.9	230.4	8	127.7	17	-27.8	-1.6	15	-1	1842.1	9.8	-16	11.4	-3.3	45	-43.3
BT1314SWRLCP06SWPU	2013	59	Anterselva	10695	26	11	57	2.3	81	F	3	13	1871.1	1545.2	116.2	196.7	6	167.6	6	-53.4	73.7	-24	4.3	1858.1	25.8	-27	-14.2	2	6	32
BT1314SWRLCP06SWPU	2013	59	Anterselva	10695	26	11	57	2.3	81	F	4	40	1872.3	1559.4	84.2	188.7	14	90.4	33	-39.2	41.7	-30	2.3	1832.3	0	0	0	0	0	0
BT1314SWRLCP06SWPU	2013	59	Anterselva	10695	26	11	57	2.3	81	F	6	38	1907.9	1572.1	109.3	188.5	12	172.9	31	-26.5	66.8	-33	5.1	1869.9	37.6	-2	12.7	2.8	-3	25.1
BT1314SWRLCP06SWPU	2013	59	Anterselva	10695	26	11	57	2.3	81	F	7	50	1910.9	1586.4	63.6	210.9	21	118.9	43	-12.2	21.1	-12	6.5	1860.9	28.6	10	27	4.2	18	-20.6
BT1314SWRLCP06SWPU	2013	59	Anterselva	10695	26	11	57	2.3	81	F	8	43	1930.3	1548.7	126	212.6	16	102.5	36	-49.9	83.5	-6	2.2	1887.3	55	3	-10.7	-0.1	24	41.8
BT1314SWRLCP06SWPU	2013	59	Anterselva	10695	26	11	57	2.3	81	F	9	31	1930.3	1572.9	110.7	215.7	9	1.6	24	-25.7	68.2	-1	0.3	1899.3	67	-9	13.5	-2	29	26.5
BT1314SWRLCP06SWPU	2013	59	Anterselva	10695	26	11	57	2.3	81	F	10	72	1950.5	1649.3	38.3	190.9	30	150.9	65	50.7	-4.2	-30	4.5	1878.5	46.2	32	89.9	2.2	0	-45.9
BT1314SWRLCP06SWPU	2013	59	Anterselva	10695	26	11	57	2.3	81	F	12	40	1954.9	1573.3	133.1	208.5	13	43.4	33	-25.3	90.6	-11	3.1	1914.9	82.6	0	13.9	0.8	19	48.9
BT1314SWRLCP06SWPU	2013	59	Anterselva	10695	26	11	57	2.3	81	F	13	50	1964.3	1629.2	89.4	195.7	22	46.4	43	30.6	46.9	-28	7.3	1914.3	82	10	69.8	5	2	5.2
BT1314SWRLCP06SWPU	2013	59	Anterselva	10695	26	11	57	2.3	81	F	14	41	1967	1613	112.4	200.6	15	7.8	34	14.4	69.9	-14	-1.8	1926	93.7	1	53.6	-4.1	16	28.2
BT1314SWRLCP06SWPU	2013	59	Anterselva	10695	26	11	57	2.3	81	F	15	83	1967.3	1557.1	131.1	196.1	36	169	76	-41.5	88.6	-21	0.7	1884.3	52	43	-2.3	-1.6	9	46.9
BT1314SWRLCP06SWPU	2013	59	Anterselva	10695	26	11	57	2.3	81	F	16	35	1973.8	1630.7	113	195.1	10	65.8	28	32.1	70.5	-27	5.7	1938.8	106.5	-5	71.3	3.4	3	28.8
BT1314SWRLCP06SWPU	2013	59	Anterselva	10695	26	11	57	2.3	81	F	17	92	1982.1	1592.2	88.7	209.2	39	120.1	85	-6.4	46.2	-13	5.8	1890.1	57.8	52	32.8	3.5	17	4.5
BT1314SWRLCP06SWPU	2013	59	Anterselva	10695	26	11	57	2.3	81	F	18	48	1983.4	1615.5	110.6	209.3	20	175.1	41	16.9	68.1	-16	8.9	1935.4	103.1	8	56.1	6.6	14	26.4
BT1314SWRLCP06SWPU	2013	59	Anterselva	10695	26	11	57	2.3	81	F	19	91	1984.6	1572.4	117.7	203.5	38	272.6	84	-26.2	75.2	-19	6.1	1893.6	61.3	51	13	3.8	11	33.5
BT1314SWRLCP06SWPU	2013	59	Anterselva	10695	26	11	57	2.3	81	F	20	67	1985.3	1648.5	85.9	183.9	26	175	60	49.9	43.4	-38	5.5	1918.3	86	27	89.1	3.2	-8	1.7
BT1314SWRLCP06SWPU	2013	59	Anterselva	10695	26	11	57	2.3	81	F	21	19	1992.2	1614.6	160.7	197.9	7	6.6	12	16	118.2	-22	3.5	1973.2	140.9	-21	55.2	1.2	8	76.5
BT1314SWRLCP06SWPU	2013	59	Anterselva	10695	26	11	57	2.3	81	F	22	71	2015.4	1630.8	107.7	205.9	28	270.1	64	32.2	65.2	-13	2.5	1944.4	112.1	31	71.4	0.2	17	23.5
BT1314SWRLCP06SWPU	2013	59	Anterselva	10695	26	11	57	2.3	81	F	23	11	2032.1	1622.8	166.1	232.2	4	30.7	4	24.2	123.6	11	4.8	2021.1	188.8	-29	63.4	2.5	41	81.9
BT1314SWRLCP06SWPU	2013	59	Anterselva	10695	26	11	57	2.3	81	F	24	94	2033	1606.1	141	191.9	41	215.7	87	7.5	98.5	-28	3.5	1939	106.7	54	46.7	1.2	2	56.8
BT1314SWRLCP06SWPU	2013	59	Anterselva	10695	26	11	57	2.3	81	F	25	82	2033.5	1636.3	117.9	197.3	35	171	75	37.7	75.4	-24	4.9	1951.5	119.2	42	76.9	2.6	6	33.7
BT1314SWRLCP06SWPU	2013	59	Anterselva	10695	26	11	57	2.3	81	F	26	81	2035.5	1628.7	115.2	210.6	34	192.6	74	30.1	72.7	-13	7.2	1954.5	122.2	41	69.3	4.9	17	31
BT1314SWRLCP06SWPU	2013	59	Anterselva	10695	26	11	57	2.3	81	F	27	36	2037.4	1614.9	187.4	199.1	11	109.3	29	16.3	144.9	-22	4.7	2001.4	169.1	-4	55.5	2.4	8	103.2
BT1314SWRLCP06SWPU	2013	59	Anterselva	10695	26	11	57	2.3	81	F	28	62	2039.5	1652.1	89.6	235.8	25	267.4	55	53.5	47.1	9	10.4	1977.5	145.2	22	92.7	8.1	39	5.4
BT1314SWRLCP06SWPU	2013	59	Anterselva	10695	26	11	57	2.3	81	F	30	125	2040.7	1624.1	67.4	224.2	59	305.8	118	25.5	24.9	3	4.8	1915.7	83.4	85	64.7	2.5	33	-16.8
BT1314SWRLCP07SWPU	2013	61	Pokljuka	10365	39	31	77	6.3	31	F	1	27	1921	1607.7	81	205.3	4	209.5	0	0	0	0	0	1894	0	0	0	0	0	0
BT1314SWRLCP07SWPU	2013	61	Pokljuka	10365	39	31	77	6.3	31	F	29	79	2166.6	1793.8	111.3	182.5	19	181	52	186.1	30.3	-27	4.2	2087.6	193.6	52	186.1	4.2	-27	30.3
BT1314SWRLCP07SWPU	2013	61	Pokljuka	10365	39	31	77	6.3	31	F	2	36	1940.7	1637.9	83.9	182.9	6	54.5	9	30.2	2.9	-22	-0.4	1904.7	10.7	9	30.2	-0.4	-22	2.9
BT1314SWRLCP07SWPU	2013	61	Pokljuka	10365	39	31	77	6.3	31	F	3	31	1975.5	1676.2	105.6	162.7	5	0	4	68.5	24.6	-40	-2.6	1944.5	50.5	4	68.5	-2.6	-40	24.6
BT1314SWRLCP07SWPU	2013	61	Pokljuka	10365	39	31	77	6.3	31	F	4	101	2001.4	1605.9	98.1	196.4	28	223.5	74	-1.8	17.1	-6	-2.9	1900.4	6.4	74	-1.8	-2.9	-6	17.1
BT1314SWRLCP07SWPU	2013	61	Pokljuka	10365	39	31	77	6.3	31	F	5	40	2010.2	1659.3	132.6	178.3	7	19.7	13	51.6	51.6	-24	-3	1970.2	76.2	13	51.6	-3	-24	51.6
BT1314SWRLCP07SWPU	2013	61	Pokljuka	10365	39	31	77	6.3	31	F	6	99	2013.7	1662.9	52.9	198.9	25	209.4	72	55.2	-28.1	-5	-1.4	1914.7	20.7	72	55.2	-1.4	-5	-28.1
BT1314SWRLCP07SMPU	2013	61	Pokljuka	10365	39	31	77	6.3	31	F	7	0	2028.6	1689.1	135.3	204.2	1	439.8	-27	81.4	54.3	-2	0.9	2028.6	134.6	-27	81.4	0.9	-2	54.3
BT1314SWRLCP07SWPU	2013	61	Pokljuka	10365	39	31	77	6.3	31	F	8	61	2054.1	1692.4	80.2	220.5	14	204.6	34	84.7	-0.8	17	-1.8	1993.1	99.1	34	84.7	-1.8	17	-0.8
BT1314SWRLCP07SWPU	2013	61	Pokljuka	10365	39	31	77	6.3	31	F	9	9	2067.5	1704.3	161.8	192.4	2	107.6	-18	96.6	80.8	-10	-2.9	2058.5	164.5	-18	96.6	-2.9	-10	80.8
BT1314SWRLCP07SWPU	2013	61	Pokljuka	10365	39	31	77	6.3	31	F	10	115	2072	1638.9	104.8	213.3	33	304	88	31.2	23.8	11	-3	1957	63	88	31.2	-3	11	23.8
BT1314SWRLCP07SWPU	2013	61	Pokljuka	10365	39	31	77	6.3	31	F	11	136	2075.3	1638.9	104.5	195.9	46	242.5	109	31.2	23.5	-9	-0.4	1939.3	45.3	109	31.2	-0.4	-9	23.5
BT1314SWRLCP07SWPU	2013	61	Pokljuka	10365	39	31	77	6.3	31	F	12	45	2077.1	1715.3	101.1	215.7	8	89.2	18	107.6	20.1	15	-4.6	2032.1	138.1	18	107.6	-4.6	15	20.1
BT1314SWRLCP07SWPU	2013	61	Pokljuka	10365	39	31	77	6.3	31	F	13	86	2088.9	1630.6	134.2	238.1	23	315.7	59	22.9	53.2	26	6.8	2002.9	108.9	59	22.9	6.8	26	53.2
BT1314SWRLCP07SWPU	2013	61	Pokljuka	10365	39	31	77	6.3	31	F	14	77	2089.5	1693.4	135	184.1	17	255.6	50	85.7	54	-22	0.8	2012.5	118.5	50	85.7	0.8	-22	54
BT1314SWRLCP07SWPU	2013	61	Pokljuka	10365	39	31	77	6.3	31	F	15	146	2090	1681.4	77.4	185.2	51	185.3	119	73.7	-3.6	-26	5.9	1944	50	119	73.7	5.9	-26	-3.6
BT1314SWRLCP07SWPU	2013	61	Pokljuka	10365	39	31	77	6.3	31	F	16	78	2102	1662.5	133.3	228.2	18	168.5	51	54.8	52.3	19	3.9	2024	130	51	54.8	3.9	19	52.3
BT1314SWRLCP07SWPU	2013	61	Pokljuka	10365	39	31	77	6.3	31	F	17	142	2106.3	1651.2	108	205.1	48	266	115	43.5	27	0	-0.2	1964.3	70.3	115	43.5	-0.2	0	27
BT1314SWRLCP07SWPU	2013	61	Pokljuka	10365	39	31	77	6.3	31	F	18	65	2114.4	1716	135.3	198.1	15	133.1	38	108.3	54.3	-14	6.8	2049.4	155.4	38	108.3	6.8	-14	54.3
BT1314SWRLCP07SWPU	2013	61	Pokljuka	10365	39	31	77	6.3	31	F	19	60	2125.6	1727.6	140.3	197.7	13	269.4	33	119.9	59.3	-4	-3.6	2065.6	171.6	33	119.9	-3.6	-4	59.3
BT1314SWRLCP07SWPU	2013	61	Pokljuka	10365	39	31	77	6.3	31	F	20	124	2128.5	1631.8	159	213.7	38	266.5	97	24.1	78	2	6.4	2004.5	110.5	97	24.1	6.4	2	78
BT1314SWRLCP07SWPU	2013	61	Pokljuka	10365	39	31	77	6.3	31	F	21	56	2129.4	1661.8	195.4	216.2	11	243.7	29	54.1	114.4	8	2.9	2073.4	179.4	29	54.1	2.9	8	114.4
BT1314SWRLCP07SWPU	2013	61	Pokljuka	10365	39	31	77	6.3	31	F	22	95	2130.4	1714.6	109.8	211	24	167.9	68	106.9	28.8	-2	7.7	2035.4	141.4	68	106.9	7.7	-2	28.8
BT1314SWRLCP07SWPU	2013	61	Pokljuka	10365	39	31	77	6.3	31	F	23	12	2130.5	1683.5	189.3	245.7	3	146.5	-15	75.8	108.3	40	0.4	2118.5	224.5	-15	75.8	0.4	40	108.3
BT1314SWRLCP07SWPU	2013	61	Pokljuka	10365	39	31	77	6.3	31	F	24	80	2142.9	1705.3	160.5	197.1	21	280	53	97.6	79.5	-14	5.8	2062.9	168.9	53	97.6	5.8	-14	79.5
BT1314SWRLCP07SWPU	2013	61	Pokljuka	10365	39	31	77	6.3	31	F	25	100	2144.5	1648.5	162	234	27	92.7	73	40.8	81	25	3.7	2044.5	150.5	73	40.8	3.7	25	81
BT1314SWRLCP07SWPU	2013	61	Pokljuka	10365	39	31	77	6.3	31	F	26	116	2147.3	1680.6	161.5	189.2	34	151	89	72.9	80.5	-17	0.9	2031.3	137.3	89	72.9	0.9	-17	80.5
BT1314SWRLCP07SWPU	2013	61	Pokljuka	10365	39	31	77	6.3	31	F	27	135	2163.5	1709.4	132.8	186.3	45	275.9	108	101.7	51.8	-20	1	2028.5	134.5	108	101.7	1	-20	51.8
BT1314SWRLCP07SWPU	2013	61	Pokljuka	10365	39	31	77	6.3	31	F	28	52	2164.7	1728.5	197.5	186.7	10	156.1	25	120.8	116.5	-18	-0.6	2112.7	218.7	25	120.8	-0.6	-18	116.5
BT1314SWRLCP07SWPU	2013	61	Pokljuka	10365	39	31	77	6.3	31	F	30	111	2167.5	1694.8	165.9	195.8	31	291.1	84	87.1	84.9	-3	-6.5	2056.5	162.5	84	87.1	-6.5	-3	84.9
BT1314SWRLCP08SMPU	2013	63	Kontiolahti	10408	30	23	64	-3.2	40	F	1	0	1852	1547.6	80.7	223.7	1	282.5	0	0	0	0	0	1852	7	-67	-19.2	0.6	-1.7	27.3
BT1314SWRLCP08SWPU	2013	63	Kontiolahti	10408	30	23	64	-3.2	40	F	2	67	1912	1566.8	53.4	224.8	20	329.9	67	19.2	-27.3	1.7	-0.6	1845	0	0	0	0	0	0
BT1314SWRLCP08SWPU	2013	63	Kontiolahti	10408	30	23	64	-3.2	40	F	3	28	1966.3	1569.9	148.9	219.5	6	225.1	28	22.3	68.2	2	-6.2	1938.3	93.3	-39	3.1	-5.6	0.3	95.5
BT1314SWRLCP08SWPU	2013	63	Kontiolahti	10408	30	23	64	-3.2	40	F	4	43	1997.7	1620.3	100.2	234.2	14	209.5	43	72.7	19.5	3.7	6.8	1954.7	109.7	-24	53.5	7.4	2	46.8
BT1314SWRLCP08SWPU	2013	63	Kontiolahti	10408	30	23	64	-3.2	40	F	5	6	2010.3	1574.8	177.3	252.2	2	0	6	27.2	96.6	23.2	5.3	2004.3	159.3	-61	8	5.9	21.5	123.9
BT1314SWRLCP08SWPU	2013	63	Kontiolahti	10408	30	23	64	-3.2	40	F	6	40	2024.1	1609.8	125.1	249.2	11	225.1	40	62.2	44.4	22.6	2.9	1984.1	139.1	-27	43	3.5	20.9	71.7
BT1314SWRLCP08SWPU	2013	63	Kontiolahti	10408	30	23	64	-3.2	40	F	7	36	2033.4	1547.9	195.8	253.7	8	314.3	36	0.3	115.1	25.1	4.9	1997.4	152.4	-31	-18.9	5.5	23.4	142.4
BT1314SWRLCP08SWPU	2013	63	Kontiolahti	10408	30	23	64	-3.2	40	F	8	86	2039.2	1662.4	80.3	210.5	30	297.3	86	114.8	-0.4	-18.8	5.6	1953.2	108.2	19	95.6	6.2	-20.5	26.9
BT1314SWRLCP08SWPU	2013	63	Kontiolahti	10408	30	23	64	-3.2	40	F	9	55	2044.7	1585.9	147.8	256	17	251.5	55	38.3	67.1	31.5	0.8	1989.7	144.7	-12	19.1	1.4	29.8	94.4
BT1314SWRLCP08SWPU	2013	63	Kontiolahti	10408	30	23	64	-3.2	40	F	10	18	2045.3	1580.8	219.9	226.6	4	256.5	18	33.2	139.2	0.4	2.5	2027.3	182.3	-49	14	3.1	-1.3	166.5
BT1314SWRLCP08SWPU	2013	63	Kontiolahti	10408	30	23	64	-3.2	40	F	11	113	2047.1	1610.9	73.6	249.6	43	271.7	113	63.3	-7.1	21.5	4.4	1934.1	89.1	46	44.1	5	19.8	20.2
BT1314SWRLCP08SWPU	2013	63	Kontiolahti	10408	30	23	64	-3.2	40	F	12	104	2048.3	1612.4	104.7	227.2	36	289.9	104	64.8	24	-8.8	12.3	1944.3	99.3	37	45.6	12.9	-10.5	51.3
BT1314SWRLCP08SWPU	2013	63	Kontiolahti	10408	30	23	64	-3.2	40	F	13	93	2049.7	1643	107.4	206.3	33	235.9	93	95.4	26.7	-20.9	3.5	1956.7	111.7	26	76.2	4.1	-22.6	54
BT1314SWRLCP08SWPU	2013	63	Kontiolahti	10408	30	23	64	-3.2	40	F	14	62	2052.5	1616.3	144.6	229.6	18	192.7	62	68.7	63.9	-0.4	6.3	1990.5	145.5	-5	49.5	6.9	-2.1	91.2
BT1314SWRLCP08SWPU	2013	63	Kontiolahti	10408	30	23	64	-3.2	40	F	15	90	2058.1	1626.4	130.8	210.9	31	187.2	90	78.8	50.1	-15	2.2	1968.1	123.1	23	59.6	2.8	-16.7	77.4
BT1314SWRLCP08SWPU	2013	63	Kontiolahti	10408	30	23	64	-3.2	40	F	16	42	2060.1	1584.5	213	220.6	12	172.1	42	36.9	132.3	-7.7	4.6	2018.1	173.1	-25	17.7	5.2	-9.4	159.6
BT1314SWRLCP08SWPU	2013	63	Kontiolahti	10408	30	23	64	-3.2	40	F	17	42	2061.5	1615.2	149.7	254.6	13	208.1	42	67.6	69	29.8	1.1	2019.5	174.5	-25	48.4	1.7	28.1	96.3
BT1314SWRLCP08SWPU	2013	63	Kontiolahti	10408	30	23	64	-3.2	40	F	18	83	2063.8	1636.6	127.5	216.7	28	295	83	89	46.8	-12.8	5.8	1980.8	135.8	16	69.8	6.4	-14.5	74.1
BT1314SWRLCP08SWPU	2013	63	Kontiolahti	10408	30	23	64	-3.2	40	F	19	69	2067.7	1587	174	237.7	22	216.9	69	39.4	93.3	12.1	1.9	1998.7	153.7	2	20.2	2.5	10.4	120.6
BT1314SWRLCP08SWPU	2013	63	Kontiolahti	10408	30	23	64	-3.2	40	F	20	69	2068.9	1613.9	130	256	21	60	69	66.3	49.3	21.9	10.4	1999.9	154.9	2	47.1	11	20.2	76.6
BT1314SWRLCP08SWPU	2013	63	Kontiolahti	10408	30	23	64	-3.2	40	F	21	75	2076.4	1625.6	125.7	250.1	24	296.7	75	78	45	25.9	0.5	2001.4	156.4	8	58.8	1.1	24.2	72.3
BT1314SWRLCP08SWPU	2013	63	Kontiolahti	10408	30	23	64	-3.2	40	F	22	27	2077.1	1564.5	219.4	266.2	5	193.3	27	16.9	138.7	31.8	10.7	2050.1	205.1	-40	-2.3	11.3	30.1	166
BT1314SWRLCP08SWPU	2013	63	Kontiolahti	10408	30	23	64	-3.2	40	F	23	39	2077.1	1587.8	200.5	249.8	10	271.8	39	40.2	119.8	25.8	0.3	2038.1	193.1	-28	21	0.9	24.1	147.1
BT1314SWRLCP08SWPU	2013	63	Kontiolahti	10408	30	23	64	-3.2	40	F	24	109	2087.7	1631.9	106	240.8	40	289.4	109	84.3	25.3	6.5	10.6	1978.7	133.7	42	65.1	11.2	4.8	52.6
BT1314SWRLCP08SWPU	2013	63	Kontiolahti	10408	30	23	64	-3.2	40	F	25	92	2087.9	1616.8	172.2	206.9	32	206.1	92	69.2	91.5	-20	3.2	1995.9	150.9	25	50	3.8	-21.7	118.8
BT1314SWRLCP08SWPU	2013	63	Kontiolahti	10408	30	23	64	-3.2	40	F	26	142	2101	1612.6	108.8	237.6	55	485.5	142	65	28.1	4.7	9.2	1959	114	75	45.8	9.8	3	55.4
BT1314SWRLCP08SWPU	2013	63	Kontiolahti	10408	30	23	64	-3.2	40	F	27	54	2103.5	1651.1	181.8	216.6	16	271.1	54	103.5	101.1	-20.7	13.6	2049.5	204.5	-13	84.3	14.2	-22.4	128.4
BT1314SWRLCP08SWPU	2013	63	Kontiolahti	10408	30	23	64	-3.2	40	F	28	82	2104.1	1642.6	128.5	251	26	257.1	82	95	47.8	20	7.3	2022.1	177.1	15	75.8	7.9	18.3	75.1
BT1314SWRLCP08SWPU	2013	63	Kontiolahti	10408	30	23	64	-3.2	40	F	29	13	2108.5	1599.1	223.6	272.8	3	158.3	13	51.5	142.9	47.1	2	2095.5	250.5	-54	32.3	2.6	45.4	170.2
BT1314SWRLCP08SWPU	2013	63	Kontiolahti	10408	30	23	64	-3.2	40	F	30	80	2109.1	1606	203.7	219.4	25	224.4	80	58.4	123	-12.4	8.1	2029.1	184.1	13	39.2	8.7	-14.1	150.3
BT1314SWRLCP09SWPU	2013	65	Holmenkollen	10243	40	24	71	2.9	89	F	24	84	2002.6	1618.4	88	212.2	22	165.8	44	98	9.1	18	4.4	1918.6	129.6	-23	102	-2.4	22.7	7.3
BT1314SWRLCP09SWPU	2013	65	Holmenkollen	10243	40	24	71	2.9	89	F	1	40	1829.1	1520.4	78.9	189.8	6	130.9	0	0	0	0	0	1789.1	0.1	-67	4	-6.8	4.7	-1.8
BT1314SWRLCP09SWPU	2013	65	Holmenkollen	10243	40	24	71	2.9	89	F	2	11	1870.9	1533.2	137.4	189.3	2	58.7	-29	12.8	58.5	-4.7	4.2	1859.9	70.9	-96	16.8	-2.6	0	56.7
BT1314SWRLCP09SWPU	2013	65	Holmenkollen	10243	40	24	71	2.9	89	F	3	34	1883.1	1564.3	87.3	197.5	4	63.4	-6	43.9	8.4	6.2	1.5	1849.1	60.1	-73	47.9	-5.3	10.9	6.6
BT1314SWRLCP09SWPU	2013	65	Holmenkollen	10243	40	24	71	2.9	89	F	4	86	1887.5	1516.4	81.9	203.2	23	173.5	46	-4	3	7.8	5.6	1801.5	12.5	-21	0	-1.2	12.5	1.2
BT1314SWRLCP09SMPU	2013	65	Holmenkollen	10243	40	24	71	2.9	89	F	5	0	1887.8	1511	177.4	199.4	1	291.2	-40	-9.4	98.5	9.1	0.5	1887.8	98.8	-107	-5.4	-6.3	13.8	96.7
BT1314SWRLCP09SWPU	2013	65	Holmenkollen	10243	40	24	71	2.9	89	F	6	33	1892.5	1556.3	80.9	222.3	3	41.8	-7	35.9	2	27.3	5.2	1859.5	70.5	-74	39.9	-1.6	32	0.2
BT1314SWRLCP09SWPU	2013	65	Holmenkollen	10243	40	24	71	2.9	89	F	7	107	1896	1516.4	80.7	191.9	33	209.3	67	-4	1.8	-4.7	6.8	1789	0	0	0	0	0	0
BT1314SWRLCP09SWPU	2013	65	Holmenkollen	10243	40	24	71	2.9	89	F	8	110	1905.6	1549.6	59.3	186.7	34	66.9	70	29.2	-19.6	-5.2	2.1	1795.6	6.6	3	33.2	-4.7	-0.5	-21.4
BT1314SWRLCP09SWPU	2013	65	Holmenkollen	10243	40	24	71	2.9	89	F	9	42	1905.7	1558.6	108.9	196.2	7	0	2	38.2	30	3.1	3.3	1863.7	74.7	-65	42.2	-3.5	7.8	28.2
BT1314SWRLCP09SWPU	2013	65	Holmenkollen	10243	40	24	71	2.9	89	F	10	61	1907.1	1541.3	104.8	200	9	210.6	21	20.9	25.9	6.4	3.8	1846.1	57.1	-46	24.9	-3	11.1	24.1
BT1314SWRLCP09SWPU	2013	65	Holmenkollen	10243	40	24	71	2.9	89	F	11	62	1908.3	1558.1	83.4	204.8	10	78	22	37.7	4.5	8.6	6.4	1846.3	57.3	-45	41.7	-0.4	13.3	2.7
BT1314SWRLCP09SWPU	2013	65	Holmenkollen	10243	40	24	71	2.9	89	F	12	105	1908.6	1570.8	32.5	200.3	31	259	65	50.4	-46.4	0.2	10.3	1803.6	14.6	-2	54.4	3.5	4.9	-48.2
BT1314SWRLCP09SWPU	2013	65	Holmenkollen	10243	40	24	71	2.9	89	F	13	112	1957.2	1560.8	106.2	178.2	36	166.2	72	40.4	27.3	-16.4	4.8	1845.2	56.2	5	44.4	-2	-11.7	25.5
BT1314SWRLCP09SWPU	2013	65	Holmenkollen	10243	40	24	71	2.9	89	F	14	37	1960	1531.1	179.6	212.3	5	54	-3	10.7	100.7	19.4	3.1	1923	134	-70	14.7	-3.7	24.1	98.9
BT1314SWRLCP09SWPU	2013	65	Holmenkollen	10243	40	24	71	2.9	89	F	15	115	1961.6	1547.9	111.2	187.5	38	333.9	75	27.5	32.3	-9	6.7	1846.6	57.6	8	31.5	-0.1	-4.3	30.5
BT1314SWRLCP09SWPU	2013	65	Holmenkollen	10243	40	24	71	2.9	89	F	16	74	1967.8	1515.7	159.6	218.5	16	522	34	-4.7	80.7	21.8	6.9	1893.8	104.8	-33	-0.7	0.1	26.5	78.9
BT1314SWRLCP09SWPU	2013	65	Holmenkollen	10243	40	24	71	2.9	89	F	17	64	1970.1	1581.7	133.8	190.6	11	79.2	24	61.3	54.9	-8.8	9.6	1906.1	117.1	-43	65.3	2.8	-4.1	53.1
BT1314SWRLCP09SWPU	2013	65	Holmenkollen	10243	40	24	71	2.9	89	F	17	71	1970.1	1540.7	160.8	197.6	13	178	31	20.3	81.9	-1.6	9.4	1899.1	110.1	-36	24.3	2.6	3.1	80.1
BT1314SWRLCP09SWPU	2013	65	Holmenkollen	10243	40	24	71	2.9	89	F	19	82	1972.4	1594.7	110.9	184.8	20	155.9	42	74.3	32	-6.9	1.9	1890.4	101.4	-25	78.3	-4.9	-2.2	30.2
BT1314SWRLCP09SWPU	2013	65	Holmenkollen	10243	40	24	71	2.9	89	F	20	80	1985	1555.8	152.5	196.7	19	165.9	40	35.4	73.6	3.1	3.8	1905	116	-27	39.4	-3	7.8	71.8
BT1314SWRLCP09SWPU	2013	65	Holmenkollen	10243	40	24	71	2.9	89	F	21	84	1994.9	1562.9	133.7	214.3	21	143.3	44	42.5	54.8	12.3	12.2	1910.9	121.9	-23	46.5	5.4	17	53
BT1314SWRLCP09SWPU	2013	65	Holmenkollen	10243	40	24	71	2.9	89	F	22	78	1995	1542.8	166.5	207.7	18	361.4	38	22.4	87.6	13	4.9	1917	128	-29	26.4	-1.9	17.7	85.8
BT1314SWRLCP09SWPU	2013	65	Holmenkollen	10243	40	24	71	2.9	89	F	23	111	1995.3	1556.8	133.7	193.8	35	76.5	71	36.4	54.8	-4.9	8.9	1884.3	95.3	4	40.4	2.1	-0.2	53
BT1314SWRLCP09SWPU	2013	65	Holmenkollen	10243	40	24	71	2.9	89	F	25	64	2007.1	1560.9	185.4	196.8	12	141	24	40.5	106.5	-1.4	8.4	1943.1	154.1	-43	44.5	1.6	3.3	104.7
BT1314SWRLCP09SWPU	2013	65	Holmenkollen	10243	40	24	71	2.9	89	F	26	119	2009.6	1560.9	138.9	190.8	42	298.8	79	40.5	60	-6.7	7.7	1890.6	101.6	12	44.5	0.9	-2	58.2
BT1314SWRLCP09SWPU	2013	65	Holmenkollen	10243	40	24	71	2.9	89	F	27	92	2011.7	1582.1	138.6	199	25	397.2	52	61.7	59.7	3.3	5.9	1919.7	130.7	-15	65.7	-0.9	8	57.9
BT1314SWRLCP09SWPU	2013	65	Holmenkollen	10243	40	24	71	2.9	89	F	28	94	2014.9	1595.7	113.8	211.4	26	182.6	54	75.3	34.9	12.1	9.5	1920.9	131.9	-13	79.3	2.7	16.8	33.1
BT1314SWRLCP09SWPU	2013	65	Holmenkollen	10243	40	24	71	2.9	89	F	29	128	2022.6	1569.8	110.8	214	45	405.2	88	49.4	31.9	15.4	8.8	1894.6	105.6	21	53.4	2	20.1	30.1
BT1314SWRLCP09SWPU	2013	65	Holmenkollen	10243	40	24	71	2.9	89	F	30	141	2031.9	1600.1	58.7	232.1	54	249.3	101	79.7	-20.2	34.7	7.6	1890.9	101.9	34	83.7	0.8	39.4	-22
BT1314SWRLOG__SWPU	2013	67	Sochi	9897	29	28	29	2.2	59	F	15	40	1859.1	1515.3	85.9	217.9	13	52.9	8	32.6	23.6	22	2.2	1819.1	80.4	8	32.6	2.2	22	23.6
BT1314SWRLOG__SWPU	2013	67	Sochi	9897	29	28	29	2.2	59	F	17	31	1863.2	1580.4	87.7	164.1	6	73	-1	97.7	25.4	-34	4.4	1832.2	93.5	-1	97.7	4.4	-34	25.4
BT1314SWRLOG__SWPU	2013	67	Sochi	9897	29	28	29	2.2	59	F	21	44	1902.9	1576.4	90.8	191.7	16	42	12	93.7	28.5	-15	13	1858.9	120.2	12	93.7	13	-15	28.5
BT1314SWRLOG__SWPU	2013	67	Sochi	9897	29	28	29	2.2	59	F	24	45	1932.3	1516.5	182.4	188.4	18	73	13	33.8	120.1	-9	3.7	1887.3	148.6	13	33.8	3.7	-9	120.1
BT1314SWRLOG__SWPU	2013	67	Sochi	9897	29	28	29	2.2	59	F	27	34	1936.6	1529.2	179.3	194.1	11	37.6	2	46.5	117	-1	1.4	1902.6	163.9	2	46.5	1.4	-1	117
BT1314SWRLOG__SWPU	2013	67	Sochi	9897	29	28	29	2.2	59	F	1	32	1770.7	1482.7	62.3	193.7	9	192.1	0	0	0	0	0	1738.7	0	0	0	0	0	0
BT1314SWRLOG__SWPU	2013	67	Sochi	9897	29	28	29	2.2	59	F	2	34	1808.3	1517.3	65.7	191.3	10	0	2	34.6	3.4	-3	0.6	1774.3	35.6	2	34.6	0.6	-3	3.4
BT1314SWRLOG__SWPU	2013	67	Sochi	9897	29	28	29	2.2	59	F	3	42	1812.7	1525.8	62.4	182.5	15	100.9	10	43.1	0.1	-14	2.8	1770.7	32	10	43.1	2.8	-14	0.1
BT1314SWRLOG__SWPU	2013	67	Sochi	9897	29	28	29	2.2	59	F	4	71	1818.3	1499.4	61	186.9	29	72.3	39	16.7	-1.3	-9	2.2	1747.3	8.6	39	16.7	2.2	-9	-1.3
BT1314SWRLOG__SWPU	2013	67	Sochi	9897	29	28	29	2.2	59	F	5	38	1823.6	1535.4	64.5	185.7	12	165.9	6	52.7	2.2	-12	4	1785.6	46.9	6	52.7	4	-12	2.2
BT1314SWRLOG__SMPU	2013	67	Sochi	9897	29	28	29	2.2	59	F	6	0	1829.1	1534.3	89.9	204.9	1	356	-32	51.6	27.6	10	1.2	1829.1	90.4	-32	51.6	1.2	10	27.6
BT1314SWRLOG__SWPU	2013	67	Sochi	9897	29	28	29	2.2	59	F	7	20	1832.9	1567.6	68.6	176.7	2	58.4	-12	84.9	6.3	-19	2	1812.9	74.2	-12	84.9	2	-19	6.3
BT1314SWRLOG__SWPU	2013	67	Sochi	9897	29	28	29	2.2	59	F	8	28	1837.8	1546.6	62.1	201.1	4	69.6	-4	63.9	-0.2	5	2.4	1809.8	71.1	-4	63.9	2.4	5	-0.2
BT1314SWRLOG__SWPU	2013	67	Sochi	9897	29	28	29	2.2	59	F	9	64	1840.2	1548.6	38	189.6	24	164.6	32	65.9	-24.3	-10	5.9	1776.2	37.5	32	65.9	5.9	-10	-24.3
BT1314SWRLOG__SWPU	2013	67	Sochi	9897	29	28	29	2.2	59	F	10	22	1840.3	1544.2	93.6	180.5	3	62.2	-10	61.5	31.3	-17	3.8	1818.3	79.6	-10	61.5	3.8	-17	31.3
BT1314SWRLOG__SWPU	2013	67	Sochi	9897	29	28	29	2.2	59	F	11	70	1843	1549.2	37.2	186.6	28	234.3	38	66.5	-25.1	-12	4.9	1773	34.3	38	66.5	4.9	-12	-25.1
BT1314SWRLOG__SWPU	2013	67	Sochi	9897	29	28	29	2.2	59	F	12	30	1843.7	1535.1	89.3	189.3	5	67.1	-2	52.4	27	-4	-0.4	1813.7	75	-2	52.4	-0.4	-4	27
BT1314SWRLOG__SWPU	2013	67	Sochi	9897	29	28	29	2.2	59	F	13	44	1843.7	1535	60.1	204.6	17	132.2	12	52.3	-2.2	6	4.9	1799.7	61	12	52.3	4.9	6	-2.2
BT1314SWRLOG__SWPU	2013	67	Sochi	9897	29	28	29	2.2	59	F	14	48	1853.6	1541.1	63.7	200.8	20	144.4	16	58.4	1.4	0	7.1	1805.6	66.9	16	58.4	7.1	0	1.4
BT1314SWRLOG__SWPU	2013	67	Sochi	9897	29	28	29	2.2	59	F	16	72	1862.3	1480.2	110.9	199.2	30	47.6	40	-2.5	48.6	-2	7.5	1790.3	51.6	40	-2.5	7.5	-2	48.6
BT1314SWRLOG__SWPU	2013	67	Sochi	9897	29	28	29	2.2	59	F	18	42	1871.6	1503.1	134.4	192.1	14	88.4	10	20.4	72.1	-7	5.4	1829.6	90.9	10	20.4	5.4	-7	72.1
BT1314SWRLOG__SWPU	2013	67	Sochi	9897	29	28	29	2.2	59	F	19	48	1874	1538	86.9	201.1	21	82.9	16	55.3	24.6	-3	10.4	1826	87.3	16	55.3	10.4	-3	24.6
BT1314SWRLOG__SWPU	2013	67	Sochi	9897	29	28	29	2.2	59	F	20	31	1885.4	1572.8	84.3	197.3	7	92.5	-1	90.1	22	3	0.6	1854.4	115.7	-1	90.1	0.6	3	22
BT1314SWRLOG__SWPU	2013	67	Sochi	9897	29	28	29	2.2	59	F	22	66	1914.2	1591.9	68.1	188.2	26	284.9	34	109.2	5.8	-7	1.5	1848.2	109.5	34	109.2	1.5	-7	5.8
BT1314SWRLOG__SWPU	2013	67	Sochi	9897	29	28	29	2.2	59	F	23	47	1915.1	1585.3	91.5	191.3	19	161.6	15	102.6	29.2	-9	6.6	1868.1	129.4	15	102.6	6.6	-9	29.2
BT1314SWRLOG__SWPU	2013	67	Sochi	9897	29	28	29	2.2	59	F	25	79	1935.1	1510.4	138.6	207.1	32	172	47	27.7	76.3	12	1.4	1856.1	117.4	47	27.7	1.4	12	76.3
BT1314SWRLOG__SWPU	2013	67	Sochi	9897	29	28	29	2.2	59	F	26	55	1935.3	1579.4	117.7	183.2	23	179.7	23	96.7	55.4	-16	5.5	1880.3	141.6	23	96.7	5.5	-16	55.4
BT1314SWRLOG__SWPU	2013	67	Sochi	9897	29	28	29	2.2	59	F	28	73	1942.7	1586.6	94.1	189	31	91.6	41	103.9	31.8	-2	-2.7	1869.7	131	41	103.9	-2.7	-2	31.8
BT1314SWRLOG__SWPU	2013	67	Sochi	9897	29	28	29	2.2	59	F	29	55	1950.4	1584	112.7	198.7	22	103.3	23	101.3	50.4	3	2	1895.4	156.7	23	101.3	2	3	50.4
BT1314SWRLOG__SWPU	2013	67	Sochi	9897	29	28	29	2.2	59	F	30	116	1958.8	1579.5	67.5	195.8	46	268.3	84	96.8	5.2	-5	7.1	1842.8	104.1	84	96.8	7.1	-5	5.2
BT1213SWRLCP01SMPU	2012	69	Oestersund	10485	31	20	59	-12	71	F	1	0	1861.9	1593.5	59.6	208.8	1	461.7	0	0	0	0	0	1861.9	8.2	-38	17.2	8.8	-18.7	0.9
BT1213SWRLCP01SWPU	2012	69	Oestersund	10485	31	20	59	-12	71	F	27	102	2050.5	1519.3	176.4	252.8	35	355.1	102	-74.2	116.8	54.9	-10.9	1948.5	94.8	64	-57	-2.1	36.2	117.7
BT1213SWRLCP01SWPU	2012	69	Oestersund	10485	31	20	59	-12	71	F	2	38	1891.7	1576.3	58.7	218.7	7	107.7	38	-17.2	-0.9	18.7	-8.8	1853.7	0	0	0	0	0	0
BT1213SWRLCP01SWPU	2012	69	Oestersund	10485	31	20	59	-12	71	F	3	27	1913.4	1606.7	32.1	247.6	5	158.8	27	13.2	-27.5	40.8	-2	1886.4	32.7	-11	30.4	6.8	22.1	-26.6
BT1213SWRLCP01SWPU	2012	69	Oestersund	10485	31	20	59	-12	71	F	4	19	1931.9	1607.9	83	222	3	75.2	19	14.4	23.4	19.6	-6.4	1912.9	59.2	-19	31.6	2.4	0.9	24.3
BT1213SWRLCP01SWPU	2012	69	Oestersund	10485	31	20	59	-12	71	F	5	17	1937.1	1585.5	112.4	222.2	2	0	17	-8	52.8	18	-4.6	1920.1	66.4	-21	9.2	4.2	-0.7	53.7
BT1213SWRLCP01SWPU	2012	69	Oestersund	10485	31	20	59	-12	71	F	6	43	1940.9	1624.3	55.7	217.9	8	29.8	43	30.8	-3.9	10.2	-1.1	1897.9	44.2	5	48	7.7	-8.5	-3
BT1213SWRLCP01SWPU	2012	69	Oestersund	10485	31	20	59	-12	71	F	7	44	1946.1	1598.7	85.2	218.2	9	79	44	5.2	25.6	12.2	-2.8	1902.1	48.4	6	22.4	6	-6.5	26.5
BT1213SWRLCP01SWPU	2012	69	Oestersund	10485	31	20	59	-12	71	F	8	68	1962.8	1544.6	127.9	222.3	19	152.8	68	-48.9	68.3	20.1	-6.6	1894.8	41.1	30	-31.7	2.2	1.4	69.2
BT1213SWRLCP01SWPU	2012	69	Oestersund	10485	31	20	59	-12	71	F	9	81	1964.3	1598.8	57.5	227	26	143.2	81	5.3	-2.1	16.3	1.9	1883.3	29.6	43	22.5	10.7	-2.4	-1.2
BT1213SWRLCP01SWPU	2012	69	Oestersund	10485	31	20	59	-12	71	F	10	35	1969.6	1620.4	83.9	230.3	6	51.5	35	26.9	24.3	26.5	-5	1934.6	80.9	-3	44.1	3.8	7.8	25.2
BT1213SWRLCP01SWPU	2012	69	Oestersund	10485	31	20	59	-12	71	F	11	61	1985.1	1630	61.2	232.9	16	181.4	61	36.5	1.6	25.9	-1.8	1924.1	70.4	23	53.7	7	7.2	2.5
BT1213SWRLCP01SWPU	2012	69	Oestersund	10485	31	20	59	-12	71	F	12	74	1985.3	1530.5	159.7	221.1	21	152.1	74	-63	100.1	22.6	-10.3	1911.3	57.6	36	-45.8	-1.5	3.9	101
BT1213SWRLCP01SWPU	2012	69	Oestersund	10485	31	20	59	-12	71	F	13	55	1985.5	1573.1	107.3	250.1	14	195	55	-20.4	47.7	47	-5.7	1930.5	76.8	17	-3.2	3.1	28.3	48.6
BT1213SWRLCP01SWPU	2012	69	Oestersund	10485	31	20	59	-12	71	F	14	78	1995.4	1630.5	30.4	256.5	24	353.2	78	37	-29.2	51	-3.3	1917.4	63.7	40	54.2	5.5	32.3	-28.3
BT1213SWRLCP01SWPU	2012	69	Oestersund	10485	31	20	59	-12	71	F	15	48	1999.2	1593.8	136.6	220.8	12	191.9	48	0.3	77	15	-3	1951.2	97.5	10	17.5	5.8	-3.7	77.9
BT1213SWRLCP01SWPU	2012	69	Oestersund	10485	31	20	59	-12	71	F	16	79	2005.1	1591.4	105.9	228.8	25	133.5	79	-2.1	46.3	32.6	-12.6	1926.1	72.4	41	15.1	-3.8	13.9	47.2
BT1213SWRLCP01SWPU	2012	69	Oestersund	10485	31	20	59	-12	71	F	17	107	2013.5	1559.7	105.2	241.6	38	186.6	107	-33.8	45.6	41.2	-8.4	1906.5	52.8	69	-16.6	0.4	22.5	46.5
BT1213SWRLCP01SWPU	2012	69	Oestersund	10485	31	20	59	-12	71	F	18	73	2014	1585	137.1	218.9	20	100.9	73	-8.5	77.5	18.9	-8.8	1941	87.3	35	8.7	0	0.2	78.4
BT1213SWRLCP01SWPU	2012	69	Oestersund	10485	31	20	59	-12	71	F	19	64	2014.7	1596.9	136.3	217.5	18	158.8	64	3.4	76.7	20.9	-12.2	1950.7	97	26	20.6	-3.4	2.2	77.6
BT1213SWRLCP01SWPU	2012	69	Oestersund	10485	31	20	59	-12	71	F	20	90	2018.7	1632.7	57.1	238.9	29	203.6	90	39.2	-2.5	30.6	-0.5	1928.7	75	52	56.4	8.3	11.9	-1.6
BT1213SWRLCP01SWPU	2012	69	Oestersund	10485	31	20	59	-12	71	F	21	62	2020.7	1610.4	111.9	236.4	17	123.2	62	16.9	52.3	26.3	1.3	1958.7	105	24	34.1	10.1	7.6	53.2
BT1213SWRLCP01SWPU	2012	69	Oestersund	10485	31	20	59	-12	71	F	22	24	2020.7	1585.2	185.8	225.7	4	70	24	-8.3	126.2	23.3	-6.4	1996.7	143	-14	8.9	2.4	4.6	127.1
BT1213SWRLCP01SWPU	2012	69	Oestersund	10485	31	20	59	-12	71	F	23	116	2029.1	1535.9	127.6	249.6	45	212.6	116	-57.6	68	46.7	-5.9	1913.1	59.4	78	-40.4	2.9	28	68.9
BT1213SWRLCP01SWPU	2012	69	Oestersund	10485	31	20	59	-12	71	F	24	57	2043.3	1575	155.4	255.9	15	123.6	57	-18.5	95.8	55.1	-8	1986.3	132.6	19	-1.3	0.8	36.4	96.7
BT1213SWRLCP01SWPU	2012	69	Oestersund	10485	31	20	59	-12	71	F	25	85	2045	1608.2	134.1	217.7	27	102.4	85	14.7	74.5	5.1	3.8	1960	106.3	47	31.9	12.6	-13.6	75.4
BT1213SWRLCP01SWPU	2012	69	Oestersund	10485	31	20	59	-12	71	F	26	107	2048.5	1616.1	83.3	242.1	37	315.2	107	22.6	23.7	36.8	-3.5	1941.5	87.8	69	39.8	5.3	18.1	24.6
BT1213SWRLCP01SWPU	2012	69	Oestersund	10485	31	20	59	-12	71	F	28	91	2050.9	1601.3	136.2	222.4	30	156.8	91	7.8	76.6	16.6	-3	1959.9	106.2	53	25	5.8	-2.1	77.5
BT1213SWRLCP01SWPU	2012	69	Oestersund	10485	31	20	59	-12	71	F	29	46	2053.8	1595.3	185.1	227.4	11	225.7	46	1.8	125.5	21.1	-2.5	2007.8	154.1	8	19	6.3	2.4	126.4
BT1213SWRLCP01SWPU	2012	69	Oestersund	10485	31	20	59	-12	71	F	30	50	2056.9	1639.4	112.7	254.8	13	137.3	50	45.9	53.1	53.7	-7.7	2006.9	153.2	12	63.1	1.1	35	54
BT1213SWRLCP02SWPU	2012	71	Hochfilzen	10440	17	16	65	-7	68	F	1	16	1873.4	1575.9	56.4	225.1	4	30.2	0	0	0	0	0	1857.4	0	0	0	0	0	0
BT1213SWRLCP02SWPU	2012	71	Hochfilzen	10440	17	16	65	-7	68	F	2	13	1903.6	1586.2	85.4	219	3	33.3	-3	10.3	29	-7	0.9	1890.6	33.2	-3	10.3	0.9	-7	29
BT1213SWRLCP02SWPU	2012	71	Hochfilzen	10440	17	16	65	-7	68	F	3	5	1906.7	1538.5	123	240.2	2	39.6	-11	-37.4	66.6	20	-4.9	1901.7	44.3	-11	-37.4	-4.9	20	66.6
BT1213SWRLCP02SWPU	2012	71	Hochfilzen	10440	17	16	65	-7	68	F	4	40	1911.8	1591.5	50.4	229.9	7	122.7	24	15.6	-6	7	-2.2	1871.8	14.4	24	15.6	-2.2	7	-6
BT1213SWRLCP02SMPU	2012	71	Hochfilzen	10440	17	16	65	-7	68	F	5	0	1913	1575.6	105.5	231.9	1	285.7	-16	-0.3	49.1	11	-4.2	1913	55.6	-16	-0.3	-4.2	11	49.1
BT1213SWRLCP02SWPU	2012	71	Hochfilzen	10440	17	16	65	-7	68	F	6	44	1932.8	1536.1	122	230.7	9	139.4	28	-39.8	65.6	12	-6.4	1888.8	31.4	28	-39.8	-6.4	12	65.6
BT1213SWRLCP02SWPU	2012	71	Hochfilzen	10440	17	16	65	-7	68	F	7	49	1936.9	1609.5	53	225.4	10	59.4	33	33.6	-3.4	4	-3.7	1887.9	30.5	33	33.6	-3.7	4	-3.4
BT1213SWRLCP02SWPU	2012	71	Hochfilzen	10440	17	16	65	-7	68	F	8	63	1945.1	1591.6	55.1	235.4	16	80.7	47	15.7	-1.3	12	-1.7	1882.1	24.7	47	15.7	-1.7	12	-1.3
BT1213SWRLCP02SWPU	2012	71	Hochfilzen	10440	17	16	65	-7	68	F	9	52	1947.2	1613.3	58.4	223.5	11	63.5	36	37.4	2	2	-3.6	1895.2	37.8	36	37.4	-3.6	2	2
BT1213SWRLCP02SWPU	2012	71	Hochfilzen	10440	17	16	65	-7	68	F	10	55	1951	1588.3	51.9	255.8	13	231.9	39	12.4	-4.5	32	-1.3	1896	38.6	39	12.4	-1.3	32	-4.5
BT1213SWRLCP02SWPU	2012	71	Hochfilzen	10440	17	16	65	-7	68	F	11	61	1954.1	1586.3	52.1	254.7	14	77.6	45	10.4	-4.3	36	-6.4	1893.1	35.7	45	10.4	-6.4	36	-4.3
BT1213SWRLCP02SWPU	2012	71	Hochfilzen	10440	17	16	65	-7	68	F	12	70	1957.3	1593.3	53.7	240.3	20	149.8	54	17.4	-2.7	19	-3.8	1887.3	29.9	54	17.4	-3.8	19	-2.7
BT1213SWRLCP02SWPU	2012	71	Hochfilzen	10440	17	16	65	-7	68	F	13	98	1960.6	1562.7	75.6	224.3	27	236.6	82	-13.2	19.2	1	-1.8	1862.6	5.2	82	-13.2	-1.8	1	19.2
BT1213SWRLCP02SWPU	2012	71	Hochfilzen	10440	17	16	65	-7	68	F	14	73	1977.9	1606.7	47.5	250.7	21	83.9	57	30.8	-8.9	34	-8.4	1904.9	47.5	57	30.8	-8.4	34	-8.9
BT1213SWRLCP02SWPU	2012	71	Hochfilzen	10440	17	16	65	-7	68	F	15	34	1996.1	1601.9	136.5	223.7	6	142.2	18	26	80.1	-4	2.6	1962.1	104.7	18	26	2.6	-4	80.1
BT1213SWRLCP02SWPU	2012	71	Hochfilzen	10440	17	16	65	-7	68	F	16	86	2004.7	1623.2	79.1	216.4	25	177.3	70	47.3	22.7	-3.6	-5.1	1918.7	61.3	70	47.3	-5.1	-3.6	22.7
BT1213SWRLCP02SWPU	2012	71	Hochfilzen	10440	17	16	65	-7	68	F	17	65	2010.7	1581.5	127.6	236.6	17	71.7	49	5.6	71.2	21	-9.5	1945.7	88.3	49	5.6	-9.5	21	71.2
BT1213SWRLCP02SWPU	2012	71	Hochfilzen	10440	17	16	65	-7	68	F	18	40	2012.8	1644.1	80.3	248.4	8	38.4	24	68.2	23.9	28	-4.7	1972.8	115.4	24	68.2	-4.7	28	23.9
BT1213SWRLCP02SWPU	2012	71	Hochfilzen	10440	17	16	65	-7	68	F	19	29	2015.6	1618.9	134.9	232.8	5	0	13	43	78.5	9	-1.3	1986.6	129.2	13	43	-1.3	9	78.5
BT1213SWRLCP02SWPU	2012	71	Hochfilzen	10440	17	16	65	-7	68	F	20	67	2023.2	1616.1	100.6	239.5	19	187.9	51	40.2	44.2	21	-6.6	1956.2	98.8	51	40.2	-6.6	21	44.2
BT1213SWRLCP02SWPU	2012	71	Hochfilzen	10440	17	16	65	-7	68	F	21	130	2024.6	1620.9	51	222.7	53	278.2	114	45	-5.4	4	-6.4	1894.6	37.2	114	45	-6.4	4	-5.4
BT1213SWRLCP02SWPU	2012	71	Hochfilzen	10440	17	16	65	-7	68	F	22	120	2025.1	1627.9	56	221.2	44	351.5	104	52	-0.4	-3	-0.9	1905.1	47.7	104	52	-0.9	-3	-0.4
BT1213SWRLCP02SWPU	2012	71	Hochfilzen	10440	17	16	65	-7	68	F	23	113	2026.7	1643.9	51.6	218.2	40	209.5	97	68	-4.8	0	-6.9	1913.7	56.3	97	68	-6.9	0	-4.8
BT1213SWRLCP02SWPU	2012	71	Hochfilzen	10440	17	16	65	-7	68	F	24	76	2045.5	1681.3	51.4	236.8	23	233.7	60	105.4	-5	17.8	-6.1	1969.5	112.1	60	105.4	-6.1	17.8	-5
BT1213SWRLCP02SWPU	2012	71	Hochfilzen	10440	17	16	65	-7	68	F	25	80	2050.7	1648.2	104.2	218.3	24	172.1	64	72.3	47.8	0.3	-7.1	1970.7	113.3	64	72.3	-7.1	0.3	47.8
BT1213SWRLCP02SWPU	2012	71	Hochfilzen	10440	17	16	65	-7	68	F	26	66	2061.3	1593.5	177.8	224	18	137.3	50	17.6	121.4	-1	-0.1	1995.3	137.9	50	17.6	-0.1	-1	121.4
BT1213SWRLCP02SWPU	2012	71	Hochfilzen	10440	17	16	65	-7	68	F	27	101	2075.3	1660.3	76	238	30	221.9	85	84.4	19.6	16	-3.1	1974.3	116.9	85	84.4	-3.1	16	19.6
BT1213SWRLCP02SWPU	2012	71	Hochfilzen	10440	17	16	65	-7	68	F	28	104	2077	1644.5	105.4	223.1	33	299.7	88	68.6	49	-5	3	1973	115.6	88	68.6	3	-5	49
BT1213SWRLCP02SWPU	2012	71	Hochfilzen	10440	17	16	65	-7	68	F	29	135	2080.6	1632.8	53.6	259.2	57	240.8	119	56.9	-2.8	31	3.1	1945.6	88.2	119	56.9	3.1	31	-2.8
BT1213SWRLCP02SWPU	2012	71	Hochfilzen	10440	17	16	65	-7	68	F	30	111	2082.9	1681.7	82.8	207.4	38	282.6	95	105.8	26.4	-19	1.3	1971.9	114.5	95	105.8	1.3	-19	26.4
BT1213SWRLCP03SWPU	2012	73	Pokljuka	10365	39	31	77	1.2	91	F	1	2	1907.8	1556.6	145.1	204.1	2	0.7	0	0	0	0	0	1905.8	25.2	-77	-91.8	-15.3	12	120.3
BT1213SWRLCP03SMPU	2012	73	Pokljuka	10365	39	31	77	1.2	91	F	2	0	1908.5	1659	27.8	221.7	1	378.2	-2	102.4	-117.3	10	7.6	1908.5	27.9	-79	10.6	-7.7	22	3
BT1213SWRLCP03SWPU	2012	73	Pokljuka	10365	39	31	77	1.2	91	F	3	34	1934.3	1655.8	50.4	194.1	5	78.3	32	99.2	-94.7	-22	12	1900.3	19.7	-45	7.4	-3.3	-10	25.6
BT1213SWRLCP03SWPU	2012	73	Pokljuka	10365	39	31	77	1.2	91	F	4	79	1959.6	1648.4	24.8	207.4	26	145.3	77	91.8	-120.3	-12	15.3	1880.6	0	0	0	0	0	0
BT1213SWRLCP03SWPU	2012	73	Pokljuka	10365	39	31	77	1.2	91	F	5	36	1965.4	1706.4	26.2	196.8	8	77.8	34	149.8	-118.9	-19	11.7	1929.4	48.8	-43	58	-3.6	-7	1.4
BT1213SWRLCP03SWPU	2012	73	Pokljuka	10365	39	31	77	1.2	91	F	6	30	1978.5	1691.3	49.6	207.6	3	0	28	134.7	-95.5	-8	11.5	1948.5	67.9	-49	42.9	-3.8	4	24.8
BT1213SWRLCP03SWPU	2012	73	Pokljuka	10365	39	31	77	1.2	91	F	7	35	1985.6	1634.2	124.1	192.3	7	119.4	33	77.6	-21	-21	9.2	1950.6	70	-44	-14.2	-6.1	-9	99.3
BT1213SWRLCP03SWPU	2012	73	Pokljuka	10365	39	31	77	1.2	91	F	8	32	1986.1	1662.3	103.8	188	4	70.7	30	105.7	-41.3	-26	9.9	1954.1	73.5	-47	13.9	-5.4	-14	79
BT1213SWRLCP03SWPU	2012	73	Pokljuka	10365	39	31	77	1.2	91	F	9	79	1986.7	1629.9	75.3	202.5	27	51.8	77	73.3	-69.8	-19	17.4	1907.7	27.1	0	-18.5	2.1	-7	50.5
BT1213SWRLCP03SWPU	2012	73	Pokljuka	10365	39	31	77	1.2	91	F	10	74	2019.6	1683	74	188.6	23	174.8	72	126.4	-71.1	-21	5.5	1945.6	65	-5	34.6	-9.8	-9	49.2
BT1213SWRLCP03SWPU	2012	73	Pokljuka	10365	39	31	77	1.2	91	F	11	120	2025.2	1681.5	22.3	201.4	46	273.5	118	124.9	-122.8	-20	17.3	1905.2	24.6	41	33.1	2	-8	-2.5
BT1213SWRLCP03SWPU	2012	73	Pokljuka	10365	39	31	77	1.2	91	F	12	34	2027.2	1649.9	151	192.3	6	26.5	32	93.3	5.9	-15	3.2	1993.2	112.6	-45	1.5	-12.1	-3	126.2
BT1213SWRLCP03SWPU	2012	73	Pokljuka	10365	39	31	77	1.2	91	F	13	71	2042.6	1654	97.3	220.3	20	207.8	69	97.4	-47.8	7	9.2	1971.6	91	-8	5.6	-6.1	19	72.5
BT1213SWRLCP03SWPU	2012	73	Pokljuka	10365	39	31	77	1.2	91	F	14	81	2043.1	1678	70.7	213.4	28	78.9	79	121.4	-74.4	-3	12.3	1962.1	81.5	2	29.6	-3	9	45.9
BT1213SWRLCP03SWPU	2012	73	Pokljuka	10365	39	31	77	1.2	91	F	15	59	2044.2	1667	105.8	212.4	15	263.3	57	110.4	-39.3	-9	17.3	1985.2	104.6	-20	18.6	2	3	81
BT1213SWRLCP03SWPU	2012	73	Pokljuka	10365	39	31	77	1.2	91	F	16	77	2053.1	1668	98.1	210	25	169.4	75	111.4	-47	-17	22.9	1976.1	95.5	-2	19.6	7.6	-5	73.3
BT1213SWRLCP03SWPU	2012	73	Pokljuka	10365	39	31	77	1.2	91	F	17	84	2073	1672.1	99.5	217.4	29	135.3	82	115.5	-45.6	-9	22.3	1989	108.4	5	23.7	7	3	74.7
BT1213SWRLCP03SWPU	2012	73	Pokljuka	10365	39	31	77	1.2	91	F	18	76	2077.2	1690	96.1	215.1	24	111.8	74	133.4	-49	1	10	2001.2	120.6	-3	41.6	-5.3	13	71.3
BT1213SWRLCP03SWPU	2012	73	Pokljuka	10365	39	31	77	1.2	91	F	19	72	2082.6	1600.7	195.5	214.4	22	247.3	70	44.1	50.4	0	10.3	2010.6	130	-7	-47.7	-5	12	170.7
BT1213SWRLCP03SWPU	2012	73	Pokljuka	10365	39	31	77	1.2	91	F	20	92	2085	1682.1	103.8	207.1	31	266	90	125.5	-41.3	-8	11	1993	112.4	13	33.7	-4.3	4	79
BT1213SWRLCP03SWPU	2012	73	Pokljuka	10365	39	31	77	1.2	91	F	21	39	2087.8	1664.1	170.2	214.5	9	57.6	37	107.5	25.1	-6	16.4	2048.8	168.2	-40	15.7	1.1	6	145.4
BT1213SWRLCP03SWPU	2012	73	Pokljuka	10365	39	31	77	1.2	91	F	22	68	2088.9	1669.1	147.3	204.5	18	230.5	66	112.5	2.2	-21	21.4	2020.9	140.3	-11	20.7	6.1	-9	122.5
BT1213SWRLCP03SWPU	2012	73	Pokljuka	10365	39	31	77	1.2	91	F	23	48	2089.5	1719.8	122.2	199.5	11	183.5	46	163.2	-22.9	-17	12.4	2041.5	160.9	-31	71.4	-2.9	-5	97.4
BT1213SWRLCP03SWPU	2012	73	Pokljuka	10365	39	31	77	1.2	91	F	24	47	2091.3	1699.2	153.7	191.4	10	180	45	142.6	8.6	-30	17.3	2044.3	163.7	-32	50.8	2	-18	128.9
BT1213SWRLCP03SWPU	2012	73	Pokljuka	10365	39	31	77	1.2	91	F	25	107	2095.3	1640.6	155	192.7	41	247.2	105	84	9.9	-26	14.6	1988.3	107.7	28	-7.8	-0.7	-14	130.2
BT1213SWRLCP03SWPU	2012	73	Pokljuka	10365	39	31	77	1.2	91	F	26	134	2096.8	1682.1	74.5	206.2	50	325.7	132	125.5	-70.6	-16	18.1	1962.8	82.2	55	33.7	2.8	-4	49.7
BT1213SWRLCP03SWPU	2012	73	Pokljuka	10365	39	31	77	1.2	91	F	27	52	2105.2	1735.4	125.1	192.7	12	181.7	50	178.8	-20	-22	10.6	2053.2	172.6	-27	87	-4.7	-10	100.3
BT1213SWRLCP03SWPU	2012	73	Pokljuka	10365	39	31	77	1.2	91	F	28	104	2111.6	1698.9	76.3	232.4	38	299.1	102	142.3	-68.8	8	20.3	2007.6	127	25	50.5	5	20	51.5
BT1213SWRLCP03SWPU	2012	73	Pokljuka	10365	39	31	77	1.2	91	F	29	70	2115.6	1697.1	154.1	194.4	19	181.1	68	140.5	9	-23	13.3	2045.6	165	-9	48.7	-2	-11	129.3
BT1213SWRLCP03SWPU	2012	73	Pokljuka	10365	39	31	77	1.2	91	F	30	99	2136.8	1709.3	127.2	201.3	33	381.3	97	152.7	-17.9	-17	14.2	2037.8	157.2	20	60.9	-1.1	-5	102.4
BT1213SWRLCP04SWPU	2012	75	Oberhof	10400	43	36	64	2.4	93	F	5	77	1961.6	1532.3	133.9	218.4	10	140	47	-66.9	41.2	20	-1.6	1884.6	28.8	-15	-71.3	-7.3	20	87.4
BT1213SWRLCP04SMPU	2012	75	Oberhof	10400	43	36	64	2.4	93	F	10	0	1986	1526.4	254.3	205.3	1	407.3	-30	-72.8	161.6	13	-7.7	1986	130.2	-92	-77.2	-13.4	13	207.8
BT1213SWRLCP04SWPU	2012	75	Oberhof	10400	43	36	64	2.4	93	F	1	30	1921.9	1599.2	92.7	200	5	63.2	0	0	0	0	0	1891.9	36.1	-62	-4.4	-5.7	0	46.2
BT1213SWRLCP04SWPU	2012	75	Oberhof	10400	43	36	64	2.4	93	F	2	92	1947.8	1603.6	46.5	205.7	16	220.1	62	4.4	-46.2	0	5.7	1855.8	0	0	0	0	0	0
BT1213SWRLCP04SWPU	2012	75	Oberhof	10400	43	36	64	2.4	93	F	3	86	1950.3	1602.6	48.1	213.6	14	65.8	56	3.4	-44.6	11	2.6	1864.3	8.5	-6	-1	-3.1	11	1.6
BT1213SWRLCP04SWPU	2012	75	Oberhof	10400	43	36	64	2.4	93	F	4	2	1958.7	1559.2	195.2	202.3	2	64.1	-28	-40	102.5	-1	3.3	1956.7	100.9	-90	-44.4	-2.4	-1	148.7
BT1213SWRLCP04SWPU	2012	75	Oberhof	10400	43	36	64	2.4	93	F	6	79	1969.9	1669.1	20.6	201.2	12	77	49	69.9	-72.1	-4	5.2	1890.9	35.1	-13	65.5	-0.5	-4	-25.9
BT1213SWRLCP04SWPU	2012	75	Oberhof	10400	43	36	64	2.4	93	F	7	24	1973.1	1612.4	117.6	219.1	3	36.8	-6	13.2	24.9	17	2.1	1949.1	93.3	-68	8.8	-3.6	17	71.1
BT1213SWRLCP04SWPU	2012	75	Oberhof	10400	43	36	64	2.4	93	F	8	101	1984.5	1560.5	91.7	231.3	20	161.9	71	-38.7	-1	28	3.3	1883.5	27.7	9	-43.1	-2.4	28	45.2
BT1213SWRLCP04SWPU	2012	75	Oberhof	10400	43	36	64	2.4	93	F	9	29	1985.1	1592.8	141.6	221.7	4	51.2	-1	-6.4	48.9	19	2.7	1956.1	100.3	-63	-10.8	-3	19	95.1
BT1213SWRLCP04SWPU	2012	75	Oberhof	10400	43	36	64	2.4	93	F	11	116	1986.4	1599.6	46.4	224.4	24	216	86	0.4	-46.3	17	7.4	1870.4	14.6	24	-4	1.7	17	-0.1
BT1213SWRLCP04SWPU	2012	75	Oberhof	10400	43	36	64	2.4	93	F	12	84	1987.7	1615.9	74.4	213.4	13	48	54	16.7	-18.3	11	2.4	1903.7	47.9	-8	12.3	-3.3	11	27.9
BT1213SWRLCP04SWPU	2012	75	Oberhof	10400	43	36	64	2.4	93	F	13	79	1998.9	1626.7	92.1	201.1	11	39.7	49	27.5	-0.6	3	-1.9	1919.9	64.1	-13	23.1	-7.6	3	45.6
BT1213SWRLCP04SWPU	2012	75	Oberhof	10400	43	36	64	2.4	93	F	14	102	2021.8	1604.4	92.4	223	21	62.6	72	5.2	-0.3	19	4	1919.8	64	10	0.8	-1.7	19	45.9
BT1213SWRLCP04SWPU	2012	75	Oberhof	10400	43	36	64	2.4	93	F	15	73	2025	1607.5	146.9	197.6	7	182.5	43	8.3	54.2	0	-2.4	1952	96.2	-19	3.9	-8.1	0	100.4
BT1213SWRLCP04SWPU	2012	75	Oberhof	10400	43	36	64	2.4	93	F	16	167	2027.3	1614.4	19.1	226.8	48	190.8	137	15.2	-73.6	26	0.8	1860.3	4.5	75	10.8	-4.9	26	-27.4
BT1213SWRLCP04SWPU	2012	75	Oberhof	10400	43	36	64	2.4	93	F	17	152	2028.9	1601	45.4	230.5	41	144.7	122	1.8	-47.3	27	3.5	1876.9	21.1	60	-2.6	-2.2	27	-1.1
BT1213SWRLCP04SWPU	2012	75	Oberhof	10400	43	36	64	2.4	93	F	18	106	2046.1	1675	70.9	194.2	22	99.9	76	75.8	-21.8	-12	6.2	1940.1	84.3	14	71.4	0.5	-12	24.4
BT1213SWRLCP04SWPU	2012	75	Oberhof	10400	43	36	64	2.4	93	F	19	126	2049.1	1571.6	140	211.5	33	198.1	96	-27.6	47.3	14	-2.5	1923.1	67.3	34	-32	-8.2	14	93.5
BT1213SWRLCP04SWPU	2012	75	Oberhof	10400	43	36	64	2.4	93	F	20	75	2053.5	1581.8	162.7	234	8	103.1	45	-17.4	70	36	-2	1978.5	122.7	-17	-21.8	-7.7	36	116.2
BT1213SWRLCP04SWPU	2012	75	Oberhof	10400	43	36	64	2.4	93	F	21	76	2061.9	1648.9	96.4	240.6	9	131.6	46	49.7	3.7	35	5.6	1985.9	130.1	-16	45.3	-0.1	35	49.9
BT1213SWRLCP04SWPU	2012	75	Oberhof	10400	43	36	64	2.4	93	F	22	121	2064.5	1656	70.3	217.2	30	278.1	91	56.8	-22.4	14	3.2	1943.5	87.7	29	52.4	-2.5	14	23.8
BT1213SWRLCP04SWPU	2012	75	Oberhof	10400	43	36	64	2.4	93	F	23	149	2066.6	1557.8	144.4	215.4	40	206.3	119	-41.4	51.7	7	8.4	1917.6	61.8	57	-45.8	2.7	7	97.9
BT1213SWRLCP04SWPU	2012	75	Oberhof	10400	43	36	64	2.4	93	F	24	142	2074.8	1614.5	95.4	222.9	37	230.8	112	15.3	2.7	18	4.9	1932.8	77	50	10.9	-0.8	18	48.9
BT1213SWRLCP04SWPU	2012	75	Oberhof	10400	43	36	64	2.4	93	F	25	169	2075.8	1614.1	93.5	199.2	50	105.4	139	14.9	0.8	-1	0.2	1906.8	51	77	10.5	-5.5	-1	47
BT1213SWRLCP04SWPU	2012	75	Oberhof	10400	43	36	64	2.4	93	F	26	97	2078.6	1646.3	146.5	188.8	17	25.9	67	47.1	53.8	-12	0.8	1981.6	125.8	5	42.7	-4.9	-12	100
BT1213SWRLCP04SWPU	2012	75	Oberhof	10400	43	36	64	2.4	93	F	27	122	2080.9	1599.6	145.9	213.4	31	142.6	92	0.4	53.2	6	7.4	1958.9	103.1	30	-4	1.7	6	99.4
BT1213SWRLCP04SWPU	2012	75	Oberhof	10400	43	36	64	2.4	93	F	28	101	2083.8	1616.3	142.5	224	19	221.7	71	17.1	49.8	27	-3	1982.8	127	9	12.7	-8.7	27	96
BT1213SWRLCP04SWPU	2012	75	Oberhof	10400	43	36	64	2.4	93	F	29	153	2089.4	1642.6	71.9	221.9	42	107	123	43.4	-20.8	15	6.9	1936.4	80.6	61	39	1.2	15	25.4
BT1213SWRLCP04SWPU	2012	75	Oberhof	10400	43	36	64	2.4	93	F	30	44	2104.4	1670	176.7	213.7	6	0	14	70.8	84	18	-4.3	2060.4	204.6	-48	66.4	-10	18	130.2
BT1213SWRLCP06SWPU	2012	77	Anterselva	10695	26	11	57	-2.8	51	F	9	99	1941.8	1558.4	84.1	200.3	30	146.7	31	24.3	-2.1	24	-17.2	1842.8	29	31	24.3	-17.2	24	-2.1
BT1213SWRLCP06SWPU	2012	77	Anterselva	10695	26	11	57	-2.8	51	F	2	26	1900.7	1594.8	66.5	213.4	4	62	-42	60.7	-19.7	27	-7.1	1874.7	60.9	-42	60.7	-7.1	27	-19.7
BT1213SWRLCP06SWPU	2012	77	Anterselva	10695	26	11	57	-2.8	51	F	6	70	1933.5	1572	83.9	207.6	20	258.7	2	37.9	-2.3	7	7.1	1863.5	49.7	2	37.9	7.1	7	-2.3
BT1213SWRLCP06SWPU	2012	77	Anterselva	10695	26	11	57	-2.8	51	F	10	22	1943.8	1535	170.3	216.5	3	25.4	-46	0.9	84.1	31	-8	1921.8	108	-46	0.9	-8	31	84.1
BT1213SWRLCP06SWPU	2012	77	Anterselva	10695	26	11	57	-2.8	51	F	1	68	1881.8	1534.1	86.2	193.5	14	152.9	0	0	0	0	0	1813.8	0	0	0	0	0	0
BT1213SWRLCP06SWPU	2012	77	Anterselva	10695	26	11	57	-2.8	51	F	3	17	1907.2	1540.5	131.9	217.8	2	90.6	-51	6.4	45.7	29	-4.7	1890.2	76.4	-51	6.4	-4.7	29	45.7
BT1213SWRLCP06SWPU	2012	77	Anterselva	10695	26	11	57	-2.8	51	F	4	37	1911.4	1597.2	86.5	190.7	6	32.7	-31	63.1	0.3	-1	-1.8	1874.4	60.6	-31	63.1	-1.8	-1	0.3
BT1213SWRLCP06SWPU	2012	77	Anterselva	10695	26	11	57	-2.8	51	F	5	36	1914.5	1588.3	62.7	227.5	5	18.9	-32	54.2	-23.5	34	0	1878.5	64.7	-32	54.2	0	34	-23.5
BT1213SWRLCP06SWPU	2012	77	Anterselva	10695	26	11	57	-2.8	51	F	7	72	1938	1581.3	61.1	223.6	21	51.7	4	47.2	-25.1	26	4.1	1866	52.2	4	47.2	4.1	26	-25.1
BT1213SWRLCP06SWPU	2012	77	Anterselva	10695	26	11	57	-2.8	51	F	8	47	1940.7	1551.5	127.4	214.8	11	82.1	-21	17.4	41.2	21	0.3	1893.7	79.9	-21	17.4	0.3	21	41.2
BT1213SWRLCP06SWPU	2012	77	Anterselva	10695	26	11	57	-2.8	51	F	11	69	1944.2	1554.4	111.1	209.7	15	0	1	20.3	24.9	11	5.2	1875.2	61.4	1	20.3	5.2	11	24.9
BT1213SWRLCP06SWPU	2012	77	Anterselva	10695	26	11	57	-2.8	51	F	12	85	1947.3	1575.7	83.4	203.2	25	146.5	17	41.6	-2.8	9	0.7	1862.3	48.5	17	41.6	0.7	9	-2.8
BT1213SWRLCP06SWPU	2012	77	Anterselva	10695	26	11	57	-2.8	51	F	13	46	1963.9	1585	106.7	226.2	10	101.2	-22	50.9	20.5	32	0.7	1917.9	104.1	-22	50.9	0.7	32	20.5
BT1213SWRLCP06SMPU	2012	77	Anterselva	10695	26	11	57	-2.8	51	F	14	0	1972.4	1561.7	197.4	213.3	1	229.1	-68	27.6	111.2	21	-1.2	1972.4	158.6	-68	27.6	-1.2	21	111.2
BT1213SWRLCP06SWPU	2012	77	Anterselva	10695	26	11	57	-2.8	51	F	15	44	1983	1599.3	136.2	203.5	9	113.5	-24	65.2	50	6	4	1939	125.2	-24	65.2	4	6	50
BT1213SWRLCP06SWPU	2012	77	Anterselva	10695	26	11	57	-2.8	51	F	16	61	1988.3	1607.4	107.8	212.1	12	58.9	-7	73.3	21.6	14	4.6	1927.3	113.5	-7	73.3	4.6	14	21.6
BT1213SWRLCP06SWPU	2012	77	Anterselva	10695	26	11	57	-2.8	51	F	17	41	1995.3	1590.1	151.6	212.6	8	167.5	-27	56	65.4	18	1.1	1954.3	140.5	-27	56	1.1	18	65.4
BT1213SWRLCP06SWPU	2012	77	Anterselva	10695	26	11	57	-2.8	51	F	18	80	1997.8	1608.2	60.1	249.5	22	56.2	12	74.1	-26.1	55	1	1917.8	104	12	74.1	1	55	-26.1
BT1213SWRLCP06SWPU	2012	77	Anterselva	10695	26	11	57	-2.8	51	F	19	119	2013.3	1617.6	62.3	214.4	39	179.6	51	83.5	-23.9	19	1.9	1894.3	80.5	51	83.5	1.9	19	-23.9
BT1213SWRLCP06SWPU	2012	77	Anterselva	10695	26	11	57	-2.8	51	F	20	84	2028.3	1589.8	154.1	200.4	24	167.5	16	55.7	67.9	7	-0.1	1944.3	130.5	16	55.7	-0.1	7	67.9
BT1213SWRLCP06SWPU	2012	77	Anterselva	10695	26	11	57	-2.8	51	F	21	93	2028.5	1633	109.3	193.2	29	203.5	25	98.9	23.1	-1	0.7	1935.5	121.7	25	98.9	0.7	-1	23.1
BT1213SWRLCP06SWPU	2012	77	Anterselva	10695	26	11	57	-2.8	51	F	22	67	2034.7	1599.8	161	206.9	13	106.5	-1	65.7	74.8	12	1.4	1967.7	153.9	-1	65.7	1.4	12	74.8
BT1213SWRLCP06SWPU	2012	77	Anterselva	10695	26	11	57	-2.8	51	F	23	125	2039.6	1617.2	87.4	210	47	275.5	57	83.1	1.2	22	-5.5	1914.6	100.8	57	83.1	-5.5	22	1.2
BT1213SWRLCP06SWPU	2012	77	Anterselva	10695	26	11	57	-2.8	51	F	24	86	2042.5	1596.8	155.2	204.5	27	215.9	18	62.7	69	11	0	1956.5	142.7	18	62.7	0	11	69
BT1213SWRLCP06SWPU	2012	77	Anterselva	10695	26	11	57	-2.8	51	F	25	83	2049.3	1641.8	105.1	219.4	23	116	15	107.7	18.9	31	-5.1	1966.3	152.5	15	107.7	-5.1	31	18.9
BT1213SWRLCP06SWPU	2012	77	Anterselva	10695	26	11	57	-2.8	51	F	26	38	2049.3	1601.7	206.7	202.9	7	29.6	-30	67.6	120.5	10	-0.6	2011.3	197.5	-30	67.6	-0.6	10	120.5
BT1213SWRLCP06SWPU	2012	77	Anterselva	10695	26	11	57	-2.8	51	F	27	122	2059.9	1641	95.7	201.2	44	376.3	54	106.9	9.5	3	4.7	1937.9	124.1	54	106.9	4.7	3	9.5
BT1213SWRLCP06SWPU	2012	77	Anterselva	10695	26	11	57	-2.8	51	F	28	118	2061.4	1658	63.9	221.5	38	213.3	50	123.9	-22.3	23	5	1943.4	129.6	50	123.9	5	23	-22.3
BT1213SWRLCP06SWPU	2012	77	Anterselva	10695	26	11	57	-2.8	51	F	29	139	2073.5	1601	108.2	225.3	54	326	71	66.9	22	33	-1.2	1934.5	120.7	71	66.9	-1.2	33	22
BT1213SWRLCP06SWPU	2012	77	Anterselva	10695	26	11	57	-2.8	51	F	30	86	2085.3	1618.5	138.9	241.9	28	160.7	18	84.4	52.7	48	0.4	1999.3	185.5	18	84.4	0.4	48	52.7
BT1213SWRLCP07SMPU	2012	79	Holmenkollen	10243	40	24	71	5.7	33	F	1	0	1932.2	1609.4	139.5	183.3	1	254.5	0	0	0	0	0	1932.2	0.8	-32	-21.6	-0.7	-32.6	55.7
BT1213SWRLCP07SWPU	2012	79	Holmenkollen	10243	40	24	71	5.7	33	F	2	32	1963.4	1631	83.8	216.6	4	45.1	32	21.6	-55.7	32.6	0.7	1931.4	0	0	0	0	0	0
BT1213SWRLCP07SWPU	2012	79	Holmenkollen	10243	40	24	71	5.7	33	F	3	31	1977.3	1622.3	131.5	192.5	3	134.5	31	12.9	-8	8.4	0.8	1946.3	14.9	-1	-8.7	0.1	-24.2	47.7
BT1213SWRLCP07SWPU	2012	79	Holmenkollen	10243	40	24	71	5.7	33	F	4	81	2024.5	1655.7	90.9	196.9	16	159.1	81	46.3	-48.6	5	8.6	1943.5	12.1	49	24.7	7.9	-27.6	7.1
BT1213SWRLCP07SWPU	2012	79	Holmenkollen	10243	40	24	71	5.7	33	F	5	12	2066.7	1597.2	252.4	205.1	2	0	12	-12.2	112.9	23.4	-1.6	2054.7	123.3	-20	-33.8	-2.3	-9.2	168.6
BT1213SWRLCP07SWPU	2012	79	Holmenkollen	10243	40	24	71	5.7	33	F	6	78	2091.3	1661.3	135.2	216.8	15	420.6	78	51.9	-4.3	27.4	6.1	2013.3	81.9	46	30.3	5.4	-5.2	51.4
BT1213SWRLCP07SWPU	2012	79	Holmenkollen	10243	40	24	71	5.7	33	F	7	65	2131.3	1654.8	186.8	224.7	9	229.4	65	45.4	47.3	35.5	5.9	2066.3	134.9	33	23.8	5.2	2.9	103
BT1213SWRLCP07SWPU	2012	79	Holmenkollen	10243	40	24	71	5.7	33	F	8	121	2133.8	1656.3	139.3	217.2	28	278.3	121	46.9	-0.2	30.6	3.3	2012.8	81.4	89	25.3	2.6	-2	55.5
BT1213SWRLCP07SWPU	2012	79	Holmenkollen	10243	40	24	71	5.7	33	F	9	52	2135.1	1650.5	214.2	218.4	6	31.2	52	41.1	74.7	29.6	5.5	2083.1	151.7	20	19.5	4.8	-3	130.4
BT1213SWRLCP07SWPU	2012	79	Holmenkollen	10243	40	24	71	5.7	33	F	10	54	2144.9	1661.5	187.2	242.2	7	202.9	54	52.1	47.7	54.1	4.8	2090.9	159.5	22	30.5	4.1	21.5	103.4
BT1213SWRLCP07SWPU	2012	79	Holmenkollen	10243	40	24	71	5.7	33	F	11	95	2152.4	1732.1	84.9	240.4	22	285.1	95	122.7	-54.6	60.2	-3.1	2057.4	126	63	101.1	-3.8	27.6	1.1
BT1213SWRLCP07SWPU	2012	79	Holmenkollen	10243	40	24	71	5.7	33	F	12	65	2161.6	1648.6	224.3	223.7	8	212.7	65	39.2	84.8	38.1	2.3	2096.6	165.2	33	17.6	1.6	5.5	140.5
BT1213SWRLCP07SWPU	2012	79	Holmenkollen	10243	40	24	71	5.7	33	F	13	132	2185.1	1703	112.3	237.8	35	304.4	132	93.6	-27.2	49.3	5.2	2053.1	121.7	100	72	4.5	16.7	28.5
BT1213SWRLCP07SWPU	2012	79	Holmenkollen	10243	40	24	71	5.7	33	F	14	138	2202.6	1642.7	185.8	236.1	40	388.5	138	33.3	46.3	51	1.8	2064.6	133.2	106	11.7	1.1	18.4	102
BT1213SWRLCP07SWPU	2012	79	Holmenkollen	10243	40	24	71	5.7	33	F	15	118	2210.5	1710.7	138.7	243.1	27	289.8	118	101.3	-0.8	54.4	5.4	2092.5	161.1	86	79.7	4.7	21.8	54.9
BT1213SWRLCP07SWPU	2012	79	Holmenkollen	10243	40	24	71	5.7	33	F	16	69	2213.6	1616.5	271.5	256.6	13	323.6	69	7.1	132	69	4.3	2144.6	213.2	37	-14.5	3.6	36.4	187.7
BT1213SWRLCP07SWPU	2012	79	Holmenkollen	10243	40	24	71	5.7	33	F	17	92	2217.3	1618.7	261.2	245.4	21	313.2	92	9.3	121.7	55.3	6.8	2125.3	193.9	60	-12.3	6.1	22.7	177.4
BT1213SWRLCP07SWPU	2012	79	Holmenkollen	10243	40	24	71	5.7	33	F	18	112	2222	1691.8	164.6	253.6	26	344.7	112	82.4	25.1	69.3	1	2110	178.6	80	60.8	0.3	36.7	80.8
BT1213SWRLCP07SWPU	2012	79	Holmenkollen	10243	40	24	71	5.7	33	F	19	131	2236.6	1790.4	118.5	196.7	34	414.1	131	181	-21	5.7	7.7	2105.6	174.2	99	159.4	7	-26.9	34.7
BT1213SWRLCP07SWPU	2012	79	Holmenkollen	10243	40	24	71	5.7	33	F	20	156	2242.8	1763.5	90	233.3	48	424.6	156	154.1	-49.5	40.1	9.9	2086.8	155.4	124	132.5	9.2	7.5	6.2
BT1213SWRLCP07SWPU	2012	79	Holmenkollen	10243	40	24	71	5.7	33	F	21	134	2244.2	1714.1	175.4	220.7	37	252.9	134	104.7	35.9	30.5	6.9	2110.2	178.8	102	83.1	6.2	-2.1	91.6
BT1213SWRLCP07SWPU	2012	79	Holmenkollen	10243	40	24	71	5.7	33	F	22	88	2245.4	1724.6	196.1	236.7	19	402.1	88	115.2	56.6	42.3	11.1	2157.4	226	56	93.6	10.4	9.7	112.3
BT1213SWRLCP07SWPU	2012	79	Holmenkollen	10243	40	24	71	5.7	33	F	23	84	2255.6	1672.5	277.1	222	17	92.3	84	63.1	137.6	30.8	7.9	2171.6	240.2	52	41.5	7.2	-1.8	193.3
BT1213SWRLCP07SWPU	2012	79	Holmenkollen	10243	40	24	71	5.7	33	F	24	68	2255.8	1669.6	266.9	251.3	12	341.5	68	60.2	127.4	62.9	5.1	2187.8	256.4	36	38.6	4.4	30.3	183.1
BT1213SWRLCP07SWPU	2012	79	Holmenkollen	10243	40	24	71	5.7	33	F	25	127	2263.2	1683.1	244	209.1	29	201.6	127	73.7	104.5	28.1	-2.3	2136.2	204.8	95	52.1	-3	-4.5	160.2
BT1213SWRLCP07SWPU	2012	79	Holmenkollen	10243	40	24	71	5.7	33	F	26	66	2273.7	1703.4	251.9	252.4	10	199.1	66	94	112.4	62.5	6.6	2207.7	276.3	34	72.4	5.9	29.9	168.1
BT1213SWRLCP07SWPU	2012	79	Holmenkollen	10243	40	24	71	5.7	33	F	27	99	2276.9	1723.4	218.4	236.1	23	220.2	99	114	78.9	41.7	11.1	2177.9	246.5	67	92.4	10.4	9.1	134.6
BT1213SWRLCP07SWPU	2012	79	Holmenkollen	10243	40	24	71	5.7	33	F	28	145	2288.4	1680.9	200.5	262	42	461.9	145	71.5	61	68.6	10.1	2143.4	212	113	49.9	9.4	36	116.7
BT1213SWRLCP07SWPU	2012	79	Holmenkollen	10243	40	24	71	5.7	33	F	29	129	2300	1693.9	217.8	259.3	32	393	129	84.5	78.3	60.5	15.5	2171	239.6	97	62.9	14.8	27.9	134
BT1213SWRLCP07SWPU	2012	79	Holmenkollen	10243	40	24	71	5.7	33	F	30	137	2320.7	1712.2	253.1	218.4	39	312	137	102.8	113.6	23.8	11.3	2183.7	252.3	105	81.2	10.6	-8.8	169.3
BT1213SWRLCP09SWPU	2012	81	Khanty	10290	36	23	52	-5.4	83	F	2	30	1865.8	1550.9	110.2	174.7	4	23.4	30	-5.1	27.7	-28.9	-16.7	1835.8	35.4	-50	26.8	-10.7	-35.7	55
BT1213SWRLCP09SMPU	2012	81	Khanty	10290	36	23	52	-5.4	83	F	1	0	1858.8	1556	82.5	220.3	1	264.8	0	0	0	0	0	1858.8	58.4	-80	31.9	6	-6.8	27.3
BT1213SWRLCP09SWPU	2012	81	Khanty	10290	36	23	52	-5.4	83	F	3	44	1873.6	1551.4	88	190.2	8	64.5	44	-4.6	5.5	-20.5	-9.6	1829.6	29.2	-36	27.3	-3.6	-27.3	32.8
BT1213SWRLCP09SWPU	2012	81	Khanty	10290	36	23	52	-5.4	83	F	4	80	1880.4	1524.1	55.2	221.1	18	177.4	80	-31.9	-27.3	6.8	-6	1800.4	0	0	0	0	0	0
BT1213SWRLCP09SWPU	2012	81	Khanty	10290	36	23	52	-5.4	83	F	5	24	1882.2	1533.9	105.2	219.1	3	34.7	24	-22.1	22.7	6	-7.2	1858.2	57.8	-56	9.8	-1.2	-0.8	50
BT1213SWRLCP09SWPU	2012	81	Khanty	10290	36	23	52	-5.4	83	F	6	56	1890.1	1566.7	58	209.4	12	131	56	10.7	-24.5	-9.7	-1.2	1834.1	33.7	-24	42.6	4.8	-16.5	2.8
BT1213SWRLCP09SWPU	2012	81	Khanty	10290	36	23	52	-5.4	83	F	7	17	1893.5	1554.6	105.6	216.3	2	0	17	-1.4	23.1	-4.5	0.5	1876.5	76.1	-63	30.5	6.5	-11.3	50.4
BT1213SWRLCP09SWPU	2012	81	Khanty	10290	36	23	52	-5.4	83	F	8	35	1900.5	1534.1	108.4	223	6	102.5	35	-21.9	25.9	7.9	-5.2	1865.5	65.1	-45	10	0.8	1.1	53.2
BT1213SWRLCP09SWPU	2012	81	Khanty	10290	36	23	52	-5.4	83	F	9	48	1901.1	1551	80	222.1	9	14.8	48	-5	-2.5	-0.1	1.9	1853.1	52.7	-32	26.9	7.9	-6.9	24.8
BT1213SWRLCP09SWPU	2012	81	Khanty	10290	36	23	52	-5.4	83	F	10	43	1923.3	1566.3	117.6	196.4	7	41.7	43	10.3	35.1	-16.5	-7.4	1880.3	79.9	-37	42.2	-1.4	-23.3	62.4
BT1213SWRLCP09SWPU	2012	81	Khanty	10290	36	23	52	-5.4	83	F	11	57	1935.3	1532.1	134	212.2	13	31.3	57	-23.9	51.5	-3.8	-4.3	1878.3	77.9	-23	8	1.7	-10.6	78.8
BT1213SWRLCP09SWPU	2012	81	Khanty	10290	36	23	52	-5.4	83	F	12	52	1939.5	1573.8	108.8	204.9	10	42.3	52	17.8	26.3	-11.3	-4.1	1887.5	87.1	-28	49.7	1.9	-18.1	53.6
BT1213SWRLCP09SWPU	2012	81	Khanty	10290	36	23	52	-5.4	83	F	13	84	1943.6	1584.6	83.1	191.9	19	21.6	84	28.6	0.6	-26	-2.4	1859.6	59.2	4	60.5	3.6	-32.8	27.9
BT1213SWRLCP09SWPU	2012	81	Khanty	10290	36	23	52	-5.4	83	F	14	65	1961	1600.9	57.9	237.2	14	76.5	65	44.9	-24.6	18.3	-1.4	1896	95.6	-15	76.8	4.6	11.5	2.7
BT1213SWRLCP09SWPU	2012	81	Khanty	10290	36	23	52	-5.4	83	F	15	31	1961.3	1561.9	181.9	186.5	5	7	31	5.9	99.4	-27.8	-6	1930.3	129.9	-49	37.8	0	-34.6	126.7
BT1213SWRLCP09SWPU	2012	81	Khanty	10290	36	23	52	-5.4	83	F	16	87	1961.4	1573.4	81.7	219.3	21	272.7	87	17.4	-0.8	-3.1	2.1	1874.4	74	7	49.3	8.1	-9.9	26.5
BT1213SWRLCP09SWPU	2012	81	Khanty	10290	36	23	52	-5.4	83	F	17	52	1989.8	1589.3	136.4	212.1	11	80.7	52	33.3	53.9	-8.1	-0.1	1937.8	137.4	-28	65.2	5.9	-14.9	81.2
BT1213SWRLCP09SWPU	2012	81	Khanty	10290	36	23	52	-5.4	83	F	18	99	2000.8	1556.6	109.4	235.8	26	288.7	99	0.6	26.9	18.6	-3.1	1901.8	101.4	19	32.5	2.9	11.8	54.2
BT1213SWRLCP09SWPU	2012	81	Khanty	10290	36	23	52	-5.4	83	F	19	120	2003.5	1638.2	60.4	184.9	32	206.9	120	82.2	-22.1	-31.4	-4	1883.5	83.1	40	114.1	2	-38.2	5.2
BT1213SWRLCP09SWPU	2012	81	Khanty	10290	36	23	52	-5.4	83	F	20	103	2013.7	1619.4	85.3	206	27	142	103	63.4	2.8	-9.6	-4.7	1910.7	110.3	23	95.3	1.3	-16.4	30.1
BT1213SWRLCP09SWPU	2012	81	Khanty	10290	36	23	52	-5.4	83	F	21	75	2033.1	1561.9	187.6	208.6	16	177.8	75	5.9	105.1	-12.7	1	1958.1	157.7	-5	37.8	7	-19.5	132.4
BT1213SWRLCP09SWPU	2012	81	Khanty	10290	36	23	52	-5.4	83	F	22	75	2036.2	1588.5	137.8	234.9	17	174.3	75	32.5	55.3	17.5	-2.9	1961.2	160.8	-5	64.4	3.1	10.7	82.6
BT1213SWRLCP09SWPU	2012	81	Khanty	10290	36	23	52	-5.4	83	F	23	73	2036.6	1607	138.6	218	15	102.2	73	51	56.1	6.3	-8.6	1963.6	163.2	-7	82.9	-2.6	-0.5	83.4
BT1213SWRLCP09SWPU	2012	81	Khanty	10290	36	23	52	-5.4	83	F	24	103	2053.9	1591	137.1	222.8	28	154.9	103	35	54.6	9.2	-6.7	1950.9	150.5	23	66.9	-0.7	2.4	81.9
BT1213SWRLCP09SWPU	2012	81	Khanty	10290	36	23	52	-5.4	83	F	25	94	2054.7	1579.9	162.5	218.3	23	266.8	94	23.9	80	4	-6	1960.7	160.3	14	55.8	0	-2.8	107.3
BT1213SWRLCP09SWPU	2012	81	Khanty	10290	36	23	52	-5.4	83	F	26	116	2060	1602.4	142.9	198.7	30	487.7	116	46.4	60.4	-21	-0.6	1944	143.6	36	78.3	5.4	-27.8	87.7
BT1213SWRLCP09SWPU	2012	81	Khanty	10290	36	23	52	-5.4	83	F	27	135	2062.6	1576.3	138	213.3	37	262.5	135	20.3	55.5	-2.1	-4.9	1927.6	127.2	55	52.2	1.1	-8.9	82.8
BT1213SWRLCP09SWPU	2012	81	Khanty	10290	36	23	52	-5.4	83	F	28	135	2063.6	1597.6	114	217	38	203.8	135	41.6	31.5	-1.7	-1.6	1928.6	128.2	55	73.5	4.4	-8.5	58.8
BT1213SWRLCP09SWPU	2012	81	Khanty	10290	36	23	52	-5.4	83	F	29	117	2065.7	1561.9	160.4	226.4	31	201.2	117	5.9	77.9	9.4	-3.3	1948.7	148.3	37	37.8	2.7	2.6	105.2
BT1213SWRLCP09SWPU	2012	81	Khanty	10290	36	23	52	-5.4	83	F	30	149	2073.7	1594	133.8	196.9	42	280.2	149	38	51.3	-20.7	-2.7	1924.7	124.3	69	69.9	3.3	-27.5	78.6
BT1213SWRLCH__SWPU	2012	83	NoveMesto	10485	20	16	52	-4.5	69	F	1	6	1728.4	1437.7	93.2	191.5	2	21.5	0	0	0	0	0	1722.4	37.8	-87	-11.6	-2	-23	74.4
BT1213SWRLCH__SWPU	2012	83	NoveMesto	10485	20	16	52	-4.5	69	F	2	35	1746.9	1454	70.8	187.1	7	113.1	29	16.3	-22.4	-9	4.6	1711.9	27.3	-58	4.7	2.6	-32	52
BT1213SWRLCH__SMPU	2012	83	NoveMesto	10485	20	16	52	-4.5	69	F	3	0	1749.9	1480.4	69.4	200.1	1	257.5	-6	42.7	-23.8	10	-1.4	1749.9	65.3	-93	31.1	-3.4	-13	50.6
BT1213SWRLCH__SWPU	2012	83	NoveMesto	10485	20	16	52	-4.5	69	F	4	25	1751.4	1447.7	88.9	189.8	4	70.9	19	10	-4.3	0	-1.7	1726.4	41.8	-68	-1.6	-3.7	-23	70.1
BT1213SWRLCH__SWPU	2012	83	NoveMesto	10485	20	16	52	-4.5	69	F	5	82	1773.8	1469.2	19.2	203.4	27	77.9	76	31.5	-74	6	5.9	1691.8	7.2	-11	19.9	3.9	-17	0.4
BT1213SWRLCH__SWPU	2012	83	NoveMesto	10485	20	16	52	-4.5	69	F	6	93	1777.6	1449.3	18.8	216.5	33	133	87	11.6	-74.4	23	2	1684.6	0	0	0	0	0	0
BT1213SWRLCH__SWPU	2012	83	NoveMesto	10485	20	16	52	-4.5	69	F	7	36	1796.7	1516.2	41.9	202.6	8	18.5	30	78.5	-51.3	7	4.1	1760.7	76.1	-57	66.9	2.1	-16	23.1
BT1213SWRLCH__SWPU	2012	83	NoveMesto	10485	20	16	52	-4.5	69	F	8	51	1798.5	1484.2	67.8	195.5	10	75.5	45	46.5	-25.4	-1	5	1747.5	62.9	-42	34.9	3	-24	49
BT1213SWRLCH__SWPU	2012	83	NoveMesto	10485	20	16	52	-4.5	69	F	9	23	1799.3	1463.2	117.1	196	3	0	17	25.5	23.9	1	3.5	1776.3	91.7	-70	13.9	1.5	-22	98.3
BT1213SWRLCH__SWPU	2012	83	NoveMesto	10485	20	16	52	-4.5	69	F	10	41	1803.9	1437.9	110.7	214.3	9	68.3	35	0.2	17.5	17	5.8	1762.9	78.3	-52	-11.4	3.8	-6	91.9
BT1213SWRLCH__SWPU	2012	83	NoveMesto	10485	20	16	52	-4.5	69	F	11	81	1806.3	1484.5	40.3	200.5	26	85.6	75	46.8	-52.9	2	7	1725.3	40.7	-12	35.2	5	-21	21.5
BT1213SWRLCH__SWPU	2012	83	NoveMesto	10485	20	16	52	-4.5	69	F	12	54	1810.4	1437.9	112.8	205.7	12	108.4	48	0.2	19.6	6	8.2	1756.4	71.8	-39	-11.4	6.2	-17	94
BT1213SWRLCH__SWPU	2012	83	NoveMesto	10485	20	16	52	-4.5	69	F	13	77	1811.1	1472.1	41.6	220.4	24	244.1	71	34.4	-51.6	24	4.9	1734.1	49.5	-16	22.8	2.9	1	22.8
BT1213SWRLCH__SWPU	2012	83	NoveMesto	10485	20	16	52	-4.5	69	F	14	65	1813.7	1435.3	106.1	207.3	17	148.4	59	-2.4	12.9	10	5.8	1748.7	64.1	-28	-14	3.8	-13	87.3
BT1213SWRLCH__SWPU	2012	83	NoveMesto	10485	20	16	52	-4.5	69	F	15	78	1814	1488.8	17.4	229.8	25	82.7	72	51.1	-75.8	36	2.3	1736	51.4	-15	39.5	0.3	13	-1.4
BT1213SWRLCH__SWPU	2012	83	NoveMesto	10485	20	16	52	-4.5	69	F	16	69	1824.8	1441.8	107.7	206.3	18	85.3	63	4.1	14.5	9	5.8	1755.8	71.2	-24	-7.5	3.8	-14	88.9
BT1213SWRLCH__SWPU	2012	83	NoveMesto	10485	20	16	52	-4.5	69	F	17	55	1833.6	1479.6	85.9	213.1	13	82	49	41.9	-7.3	18	3.6	1778.6	94	-38	30.3	1.6	-5	67.1
BT1213SWRLCH__SWPU	2012	83	NoveMesto	10485	20	16	52	-4.5	69	F	18	51	1836.8	1476.5	112.4	196.9	11	70.1	45	38.8	19.2	0	5.4	1785.8	101.2	-42	27.2	3.4	-23	93.6
BT1213SWRLCH__SWPU	2012	83	NoveMesto	10485	20	16	52	-4.5	69	F	19	69	1839	1459.5	91.5	219	19	96.4	63	21.8	-1.7	23	4.5	1770	85.4	-24	10.2	2.5	0	72.7
BT1213SWRLCH__SWPU	2012	83	NoveMesto	10485	20	16	52	-4.5	69	F	20	57	1841.3	1463.5	108.7	212.1	14	105.2	51	25.8	15.5	24	-3.4	1784.3	99.7	-36	14.2	-5.4	1	89.9
BT1213SWRLCH__SWPU	2012	83	NoveMesto	10485	20	16	52	-4.5	69	F	21	33	1841.5	1448.9	154.7	204.9	6	124.7	27	11.2	61.5	9	4.4	1808.5	123.9	-60	-0.4	2.4	-14	135.9
BT1213SWRLCH__SWPU	2012	83	NoveMesto	10485	20	16	52	-4.5	69	F	22	25	1853.1	1507.7	115.1	205.3	5	23	19	70	21.9	14	-0.2	1828.1	143.5	-68	58.4	-2.2	-9	96.3
BT1213SWRLCH__SWPU	2012	83	NoveMesto	10485	20	16	52	-4.5	69	F	23	70	1853.4	1456.5	109.1	217.8	20	110.6	64	18.8	15.9	25	1.3	1783.4	98.8	-23	7.2	-0.7	2	90.3
BT1213SWRLCH__SWPU	2012	83	NoveMesto	10485	20	16	52	-4.5	69	F	24	91	1861.4	1507.2	43.4	219.8	32	173	85	69.5	-49.8	27	1.3	1770.4	85.8	-2	57.9	-0.7	4	24.6
BT1213SWRLCH__SWPU	2012	83	NoveMesto	10485	20	16	52	-4.5	69	F	25	120	1873.9	1428	109.1	216.8	43	212.4	114	-9.7	15.9	23	2.3	1753.9	69.3	27	-21.3	0.3	0	90.3
BT1213SWRLCH__SWPU	2012	83	NoveMesto	10485	20	16	52	-4.5	69	F	26	88	1874.5	1480.1	104.8	201.6	29	260.2	82	42.4	11.6	8	2.1	1786.5	101.9	-5	30.8	0.1	-15	86
BT1213SWRLCH__SWPU	2012	83	NoveMesto	10485	20	16	52	-4.5	69	F	27	102	1876	1465.1	111.1	197.8	34	49.2	96	27.4	17.9	5	1.3	1774	89.4	9	15.8	-0.7	-18	92.3
BT1213SWRLCH__SWPU	2012	83	NoveMesto	10485	20	16	52	-4.5	69	F	28	64	1876.8	1464.3	135.8	212.7	16	148.6	58	26.6	42.6	15	6.2	1812.8	128.2	-29	15	4.2	-8	117
BT1213SWRLCH__SWPU	2012	83	NoveMesto	10485	20	16	52	-4.5	69	F	29	62	1877	1484.6	120.5	209.9	15	112.9	56	46.9	27.3	11	7.4	1815	130.4	-31	35.3	5.4	-12	101.7
BT1213SWRLCH__SWPU	2012	83	NoveMesto	10485	20	16	52	-4.5	69	F	30	71	1877.9	1505.2	116.1	185.6	21	125	65	67.5	22.9	-10	4.1	1806.9	122.3	-22	55.9	2.1	-33	97.3
BT1112SWRLCP01SWPU	2011	85	Oestersund	10805	31	20	90	-1.8	96	F	8	95	2152.4	1766.9	61.7	228.8	25	272.4	95	2.9	-12.3	91.4	-61.5	2057.4	20.5	95	2.9	-61.5	91.4	-12.3
BT1112SWRLCP01SWPU	2011	85	Oestersund	10805	31	20	90	-1.8	96	F	23	85	2263.9	1832.1	126.8	220	21	163.6	85	68.1	52.8	68	-46.9	2178.9	142	85	68.1	-46.9	68	52.8
BT1112SWRLCP01SWPU	2011	85	Oestersund	10805	31	20	90	-1.8	96	F	4	39	2124	1802.2	68.1	214.7	7	103.8	39	38.2	-5.9	39.3	-23.5	2085	48.1	39	38.2	-23.5	39.3	-5.9
BT1112SWRLCP01SWPU	2011	85	Oestersund	10805	31	20	90	-1.8	96	F	5	49	2129.7	1738.7	122.6	219.4	9	148.3	49	-25.3	48.6	-1.5	22	2080.7	43.8	49	-25.3	22	-1.5	48.6
BT1112SWRLCP01SWPU	2011	85	Oestersund	10805	31	20	90	-1.8	96	F	17	19	2221.9	1752.6	237.1	213.2	4	33.2	19	-11.4	163.1	14.4	-0.1	2202.9	166	19	-11.4	-0.1	14.4	163.1
BT1112SWRLCP01SWPU	2011	85	Oestersund	10805	31	20	90	-1.8	96	F	24	63	2277.1	1770.2	216.2	227.7	15	171.5	63	6.2	142.2	30	-1.2	2214.1	177.2	63	6.2	-1.2	30	142.2
BT1112SWRLCP01SWPU	2011	85	Oestersund	10805	31	20	90	-1.8	96	F	1	0	2036.9	1764	74	198.9	2	84.4	0	0	0	0	0	2036.9	0	0	0	0	0	0
BT1112SWRLCP01SWPU	2011	85	Oestersund	10805	31	20	90	-1.8	96	F	2	15	2070.1	1743.8	93.4	217.9	3	0	15	-20.2	19.4	18.2	0.8	2055.1	18.2	15	-20.2	0.8	18.2	19.4
BT1112SWRLCP01SMPU	2011	85	Oestersund	10805	31	20	90	-1.8	96	F	3	0	2121.3	1757.3	156.4	207.6	1	183.1	0	-6.7	82.4	2.6	6.1	2121.3	84.4	0	-6.7	6.1	2.6	82.4
BT1112SWRLCP01SWPU	2011	85	Oestersund	10805	31	20	90	-1.8	96	F	6	103	2140.2	1765	63.1	209.1	27	367	103	1	-10.9	4.1	6.1	2037.2	0.3	103	1	6.1	4.1	-10.9
BT1112SWRLCP01SWPU	2011	85	Oestersund	10805	31	20	90	-1.8	96	F	7	25	2140.7	1829.9	68.6	217.2	6	181.1	25	65.9	-5.4	22.5	-4.2	2115.7	78.8	25	65.9	-4.2	22.5	-5.4
BT1112SWRLCP01SWPU	2011	85	Oestersund	10805	31	20	90	-1.8	96	F	9	68	2177.4	1782.1	118.6	208.7	19	252.4	68	18.1	44.6	5.3	4.5	2109.4	72.5	68	18.1	4.5	5.3	44.6
BT1112SWRLCP01SWPU	2011	85	Oestersund	10805	31	20	90	-1.8	96	F	10	43	2185.2	1782.8	124.2	235.2	8	87.1	43	18.8	50.2	26.3	10	2142.2	105.3	43	18.8	10	26.3	50.2
BT1112SWRLCP01SWPU	2011	85	Oestersund	10805	31	20	90	-1.8	96	F	11	57	2192.8	1814.8	97.1	223.9	12	196.7	57	50.8	23.1	17.7	7.3	2135.8	98.9	57	50.8	7.3	17.7	23.1
BT1112SWRLCP01SWPU	2011	85	Oestersund	10805	31	20	90	-1.8	96	F	12	77	2200.5	1783	119.2	221.3	20	140.5	77	19	45.2	31.2	-8.8	2123.5	86.6	77	19	-8.8	31.2	45.2
BT1112SWRLCP01SWPU	2011	85	Oestersund	10805	31	20	90	-1.8	96	F	13	64	2203.3	1804.3	126.4	208.6	16	240.2	64	40.3	52.4	-0.9	10.6	2139.3	102.4	64	40.3	10.6	-0.9	52.4
BT1112SWRLCP01SWPU	2011	85	Oestersund	10805	31	20	90	-1.8	96	F	14	61	2208.4	1829	96.7	221.7	14	226.7	61	65	22.7	18.6	4.2	2147.4	110.5	61	65	4.2	18.6	22.7
BT1112SWRLCP01SWPU	2011	85	Oestersund	10805	31	20	90	-1.8	96	F	15	104	2214.8	1776.6	117.3	216.9	29	303.2	104	12.6	43.3	14.9	3.1	2110.8	73.9	104	12.6	3.1	14.9	43.3
BT1112SWRLCP01SWPU	2011	85	Oestersund	10805	31	20	90	-1.8	96	F	16	25	2218	1809	155.1	228.9	5	185	25	45	81.1	35.1	-5.1	2193	156.1	25	45	-5.1	35.1	81.1
BT1112SWRLCP01SWPU	2011	85	Oestersund	10805	31	20	90	-1.8	96	F	18	53	2228.3	1827.1	127.7	220.5	10	92.8	53	63.1	53.7	21.8	-0.2	2175.3	138.4	53	63.1	-0.2	21.8	53.7
BT1112SWRLCP01SWPU	2011	85	Oestersund	10805	31	20	90	-1.8	96	F	19	175	2229.3	1814.1	36.6	203.6	55	487.7	175	50.1	-37.4	-3.5	8.2	2054.3	17.4	175	50.1	8.2	-3.5	-37.4
BT1112SWRLCP01SWPU	2011	85	Oestersund	10805	31	20	90	-1.8	96	F	20	66	2231.6	1835.3	126.6	203.7	17	166.4	66	71.3	52.6	1.4	3.4	2165.6	128.7	66	71.3	3.4	1.4	52.6
BT1112SWRLCP01SWPU	2011	85	Oestersund	10805	31	20	90	-1.8	96	F	21	56	2233.6	1840.6	122.2	214.8	11	191.4	56	76.6	48.2	8.4	7.5	2177.6	140.7	56	76.6	7.5	8.4	48.2
BT1112SWRLCP01SWPU	2011	85	Oestersund	10805	31	20	90	-1.8	96	F	22	60	2263.6	1901.5	76.2	225.9	13	155.9	60	137.5	2.2	9.9	17.1	2203.6	166.7	60	137.5	17.1	9.9	2.2
BT1112SWRLCP01SWPU	2011	85	Oestersund	10805	31	20	90	-1.8	96	F	25	159	2284.8	1822.9	90.4	212.5	48	465.7	159	58.9	16.4	5.6	8	2125.8	88.9	159	58.9	8	5.6	16.4
BT1112SWRLCP01SWPU	2011	85	Oestersund	10805	31	20	90	-1.8	96	F	26	131	2286.7	1880.1	68.1	207.5	39	419.9	131	116.1	-5.9	2.1	6.5	2155.7	118.8	131	116.1	6.5	2.1	-5.9
BT1112SWRLCP01SWPU	2011	85	Oestersund	10805	31	20	90	-1.8	96	F	27	67	2289.3	1856.8	123.1	242.4	18	194.7	67	92.8	49.1	42.5	1	2222.3	185.4	67	92.8	1	42.5	49.1
BT1112SWRLCP01SWPU	2011	85	Oestersund	10805	31	20	90	-1.8	96	F	28	121	2299.7	1848.1	129.5	201.1	37	350.6	121	84.1	55.5	3.8	-1.6	2178.7	141.8	121	84.1	-1.6	3.8	55.5
BT1112SWRLCP01SWPU	2011	85	Oestersund	10805	31	20	90	-1.8	96	F	29	93	2309.3	1823.3	151.4	241.6	24	307.3	93	59.3	77.4	39.8	2.9	2216.3	179.4	93	59.3	2.9	39.8	77.4
BT1112SWRLCP01SWPU	2011	85	Oestersund	10805	31	20	90	-1.8	96	F	30	145	2316.3	1841.4	96.8	233.1	43	303.7	145	77.4	22.8	29.9	4.3	2171.3	134.4	145	77.4	4.3	29.9	22.8
BT1112SWRLCP02SWPU	2011	87	Hochfilzen	10440	17	16	65	-2	87	F	11	15	1873.3	1494.4	117.8	246.1	2	3.1	-10	36.2	50.5	26	-3.8	1858.3	108.9	-10	36.2	-3.8	26	50.5
BT1112SWRLCP02SWPU	2011	87	Hochfilzen	10440	17	16	65	-2	87	F	1	25	1774.4	1458.2	67.3	223.9	5	107.6	0	0	0	0	0	1749.4	0	0	0	0	0	0
BT1112SWRLCP02SWPU	2011	87	Hochfilzen	10440	17	16	65	-2	87	F	2	23	1774.7	1487.3	49	215.4	3	98.9	-2	29.1	-18.3	-6	-2.5	1751.7	2.3	-2	29.1	-2.5	-6	-18.3
BT1112SWRLCP02SMPU	2011	87	Hochfilzen	10440	17	16	65	-2	87	F	3	0	1777.5	1486.6	71.7	219.2	1	287	-25	28.4	4.4	-2	-2.7	1777.5	28.1	-25	28.4	-2.7	-2	4.4
BT1112SWRLCP02SWPU	2011	87	Hochfilzen	10440	17	16	65	-2	87	F	4	34	1820.6	1513	45.3	228.3	8	69.8	9	54.8	-22	5	-0.6	1786.6	37.2	9	54.8	-0.6	5	-22
BT1112SWRLCP02SWPU	2011	87	Hochfilzen	10440	17	16	65	-2	87	F	5	56	1821.6	1514.1	23.7	227.8	13	86.9	31	55.9	-43.6	1	2.9	1765.6	16.2	31	55.9	2.9	1	-43.6
BT1112SWRLCP02SWPU	2011	87	Hochfilzen	10440	17	16	65	-2	87	F	6	31	1844.2	1511.7	96.1	205.4	7	91.4	6	53.5	28.8	-20	1.5	1813.2	63.8	6	53.5	1.5	-20	28.8
BT1112SWRLCP02SWPU	2011	87	Hochfilzen	10440	17	16	65	-2	87	F	7	55	1861.3	1508.3	68.3	229.7	12	143.5	30	50.1	1	3	2.8	1806.3	56.9	30	50.1	2.8	3	1
BT1112SWRLCP02SWPU	2011	87	Hochfilzen	10440	17	16	65	-2	87	F	8	74	1863.9	1522.9	46	221	17	90.3	49	64.7	-21.3	-9	6.1	1789.9	40.5	49	64.7	6.1	-9	-21.3
BT1112SWRLCP02SWPU	2011	87	Hochfilzen	10440	17	16	65	-2	87	F	9	65	1864.7	1482	99.1	218.6	16	228.1	40	23.8	31.8	-8	2.7	1799.7	50.3	40	23.8	2.7	-8	31.8
BT1112SWRLCP02SWPU	2011	87	Hochfilzen	10440	17	16	65	-2	87	F	10	28	1865.8	1481.6	138.4	217.8	6	0	3	23.4	71.1	-9	2.9	1837.8	88.4	3	23.4	2.9	-9	71.1
BT1112SWRLCP02SWPU	2011	87	Hochfilzen	10440	17	16	65	-2	87	F	12	23	1882	1498.5	136.7	223.8	4	0.3	-2	40.3	69.4	-3	2.9	1859	109.6	-2	40.3	2.9	-3	69.4
BT1112SWRLCP02SWPU	2011	87	Hochfilzen	10440	17	16	65	-2	87	F	13	103	1900	1540.1	45.9	211	26	195.7	78	81.9	-21.4	-14	1.1	1797	47.6	78	81.9	1.1	-14	-21.4
BT1112SWRLCP02SWPU	2011	87	Hochfilzen	10440	17	16	65	-2	87	F	14	60	1904.3	1511.4	114.8	218.1	14	47.2	35	53.2	47.5	-8	2.2	1844.3	94.9	35	53.2	2.2	-8	47.5
BT1112SWRLCP02SWPU	2011	87	Hochfilzen	10440	17	16	65	-2	87	F	15	34	1906.3	1511.5	143.3	217.5	10	191.9	9	53.3	76	-3	-3.4	1872.3	122.9	9	53.3	-3.4	-3	76
BT1112SWRLCP02SWPU	2011	87	Hochfilzen	10440	17	16	65	-2	87	F	16	82	1912.2	1539.9	70.8	219.5	19	160.1	57	81.7	3.5	-1	-3.4	1830.2	80.8	57	81.7	-3.4	-1	3.5
BT1112SWRLCP02SWPU	2011	87	Hochfilzen	10440	17	16	65	-2	87	F	17	36	1917.9	1517.3	142.3	222.3	11	131.9	11	59.1	75	-1	-0.6	1881.9	132.5	11	59.1	-0.6	-1	75
BT1112SWRLCP02SWPU	2011	87	Hochfilzen	10440	17	16	65	-2	87	F	18	121	1918.8	1508.6	46.1	243.1	36	275.9	96	50.4	-21.2	18	1.2	1797.8	48.4	96	50.4	1.2	18	-21.2
BT1112SWRLCP02SWPU	2011	87	Hochfilzen	10440	17	16	65	-2	87	F	19	91	1921.7	1548.5	70.6	211.6	23	191.9	66	90.3	3.3	-15	2.7	1830.7	81.3	66	90.3	2.7	-15	3.3
BT1112SWRLCP02SWPU	2011	87	Hochfilzen	10440	17	16	65	-2	87	F	20	112	1929	1497.8	94	225.2	31	257.5	87	39.6	26.7	-5	6.3	1817	67.6	87	39.6	6.3	-5	26.7
BT1112SWRLCP02SWPU	2011	87	Hochfilzen	10440	17	16	65	-2	87	F	21	75	1934.5	1571.3	71	217.2	18	89.5	50	113.1	3.7	-11	4.3	1859.5	110.1	50	113.1	4.3	-11	3.7
BT1112SWRLCP02SWPU	2011	87	Hochfilzen	10440	17	16	65	-2	87	F	22	89	1953.3	1558.3	93.1	212.9	21	222.3	64	100.1	25.8	-17	6	1864.3	114.9	64	100.1	6	-17	25.8
BT1112SWRLCP02SWPU	2011	87	Hochfilzen	10440	17	16	65	-2	87	F	23	113	1963.9	1534.9	74.7	241.3	32	154.6	88	76.7	7.4	17	0.4	1850.9	101.5	88	76.7	0.4	17	7.4
BT1112SWRLCP02SWPU	2011	87	Hochfilzen	10440	17	16	65	-2	87	F	24	90	1966.3	1488.5	147.2	240.6	22	178.9	65	30.3	79.9	14	2.7	1876.3	126.9	65	30.3	2.7	14	79.9
BT1112SWRLCP02SWPU	2011	87	Hochfilzen	10440	17	16	65	-2	87	F	25	34	1966.3	1475	239.2	218.1	9	46.2	9	16.8	171.9	-4	-1.8	1932.3	182.9	9	16.8	-1.8	-4	171.9
BT1112SWRLCP02SWPU	2011	87	Hochfilzen	10440	17	16	65	-2	87	F	26	97	1970.1	1567	71.2	234.9	25	276.3	72	108.8	3.9	3	8	1873.1	123.7	72	108.8	8	3	3.9
BT1112SWRLCP02SWPU	2011	87	Hochfilzen	10440	17	16	65	-2	87	F	27	140	1977.6	1531.3	67.2	239.1	44	352.2	115	73.1	-0.1	12	3.2	1837.6	88.2	115	73.1	3.2	12	-0.1
BT1112SWRLCP02SWPU	2011	87	Hochfilzen	10440	17	16	65	-2	87	F	28	145	1988.1	1572.5	51.4	219.2	49	261.5	120	114.3	-15.9	-9	4.3	1843.1	93.7	120	114.3	4.3	-9	-15.9
BT1112SWRLCP02SWPU	2011	87	Hochfilzen	10440	17	16	65	-2	87	F	29	88	1996.7	1547.2	144.5	217	20	137.8	63	89	77.2	-10	3.1	1908.7	159.3	63	89	3.1	-10	77.2
BT1112SWRLCP02SWPU	2011	87	Hochfilzen	10440	17	16	65	-2	87	F	30	62	2002.5	1510.7	185.8	244	15	129.9	37	52.5	118.5	20	0.1	1940.5	191.1	37	52.5	0.1	20	118.5
BT1112SWRLCP03SWPU	2011	89	Hochfilzen	10440	17	16	65	-1.5	93	F	26	117	2173.8	1691	75.9	289.9	31	323.3	117	37.7	49.8	59	-1.9	2056.8	182.2	16	80.9	-5.8	83	24.1
BT1112SWRLCP03SMPU	2011	89	Hochfilzen	10440	17	16	65	-1.5	93	F	1	0	1912.2	1653.3	26.1	232.8	1	283	0	0	0	0	0	1912.2	37.6	-101	43.2	-3.9	24	-25.7
BT1112SWRLCP03SWPU	2011	89	Hochfilzen	10440	17	16	65	-1.5	93	F	2	30	1941.3	1631.3	50	230	3	44.7	30	-22	23.9	-10	7.2	1911.3	36.7	-71	21.2	3.3	14	-1.8
BT1112SWRLCP03SWPU	2011	89	Hochfilzen	10440	17	16	65	-1.5	93	F	3	14	1956.9	1608.3	96.7	237.9	2	0	14	-45	70.6	-1	6.1	1942.9	68.3	-87	-1.8	2.2	23	44.9
BT1112SWRLCP03SWPU	2011	89	Hochfilzen	10440	17	16	65	-1.5	93	F	4	101	1975.6	1610.1	51.8	212.7	24	211.2	101	-43.2	25.7	-24	3.9	1874.6	0	0	0	0	0	0
BT1112SWRLCP03SWPU	2011	89	Hochfilzen	10440	17	16	65	-1.5	93	F	5	63	1986	1572.2	124	226.8	9	214.4	63	-81.1	97.9	-7	1	1923	48.4	-38	-37.9	-2.9	17	72.2
BT1112SWRLCP03SWPU	2011	89	Hochfilzen	10440	17	16	65	-1.5	93	F	6	75	1993.6	1634.5	49.7	234.4	14	288.7	75	-18.8	23.6	-2	3.6	1918.6	44	-26	24.4	-0.3	22	-2.1
BT1112SWRLCP03SWPU	2011	89	Hochfilzen	10440	17	16	65	-1.5	93	F	7	96	2010.6	1663.5	24.6	226.5	22	375.5	96	10.2	-1.5	-13	6.7	1914.6	40	-5	53.4	2.8	11	-27.2
BT1112SWRLCP03SWPU	2011	89	Hochfilzen	10440	17	16	65	-1.5	93	F	8	60	2014.1	1646.6	76.3	231.2	6	115.9	60	-6.7	50.2	-5	3.4	1954.1	79.5	-41	36.5	-0.5	19	24.5
BT1112SWRLCP03SWPU	2011	89	Hochfilzen	10440	17	16	65	-1.5	93	F	9	69	2021.1	1643.7	99.1	209.3	11	305.3	69	-9.6	73	-25	1.5	1952.1	77.5	-32	33.6	-2.4	-1	47.3
BT1112SWRLCP03SWPU	2011	89	Hochfilzen	10440	17	16	65	-1.5	93	F	10	56	2028.1	1670.9	83.9	217.3	5	138.4	56	17.6	57.8	-19	3.5	1972.1	97.5	-45	60.8	-0.4	5	32.1
BT1112SWRLCP03SWPU	2011	89	Hochfilzen	10440	17	16	65	-1.5	93	F	11	60	2050.1	1693.7	49.4	247	7	101.9	60	40.4	23.3	5	9.2	1990.1	115.5	-41	83.6	5.3	29	-2.4
BT1112SWRLCP03SWPU	2011	89	Hochfilzen	10440	17	16	65	-1.5	93	F	12	45	2050.6	1594.7	181.4	229.5	4	29.1	45	-58.6	155.3	-9	5.7	2005.6	131	-56	-15.4	1.8	15	129.6
BT1112SWRLCP03SWPU	2011	89	Hochfilzen	10440	17	16	65	-1.5	93	F	13	85	2055.3	1629.1	100.7	240.5	18	187.8	85	-24.2	74.6	5	2.7	1970.3	95.7	-16	19	-1.2	29	48.9
BT1112SWRLCP03SWPU	2011	89	Hochfilzen	10440	17	16	65	-1.5	93	F	14	102	2067.8	1664.8	76.9	224.1	28	249.6	102	11.5	50.8	-17	8.3	1965.8	91.2	1	54.7	4.4	7	25.1
BT1112SWRLCP03SWPU	2011	89	Hochfilzen	10440	17	16	65	-1.5	93	F	15	78	2100	1620.1	151.2	250.7	17	281.8	78	-33.2	125.1	11	6.9	2022	147.4	-23	10	3	35	99.4
BT1112SWRLCP03SWPU	2011	89	Hochfilzen	10440	17	16	65	-1.5	93	F	16	121	2107.7	1687.6	53.1	246	33	292.7	121	34.3	27	6	7.2	1986.7	112.1	20	77.5	3.3	30	1.3
BT1112SWRLCP03SWPU	2011	89	Hochfilzen	10440	17	16	65	-1.5	93	F	17	87	2110.2	1712.6	74.2	236.4	19	143.1	87	59.3	48.1	1	2.6	2023.2	148.6	-14	102.5	-1.3	25	22.4
BT1112SWRLCP03SWPU	2011	89	Hochfilzen	10440	17	16	65	-1.5	93	F	18	153	2114.5	1639.9	73	248.6	52	374.4	153	-13.4	46.9	12	3.8	1961.5	86.9	52	29.8	-0.1	36	21.2
BT1112SWRLCP03SWPU	2011	89	Hochfilzen	10440	17	16	65	-1.5	93	F	19	70	2116.4	1726.9	73.9	245.6	12	108.9	70	73.6	47.8	5	7.8	2046.4	171.8	-31	116.8	3.9	29	22.1
BT1112SWRLCP03SWPU	2011	89	Hochfilzen	10440	17	16	65	-1.5	93	F	20	97	2123.4	1635.4	150.1	240.9	23	98.4	97	-17.9	124	9	-0.9	2026.4	151.8	-4	25.3	-4.8	33	98.3
BT1112SWRLCP03SWPU	2011	89	Hochfilzen	10440	17	16	65	-1.5	93	F	21	62	2126.6	1682.7	153.1	228.8	8	137.9	62	29.4	127	-9	5	2064.6	190	-39	72.6	1.1	15	101.3
BT1112SWRLCP03SWPU	2011	89	Hochfilzen	10440	17	16	65	-1.5	93	F	22	89	2128.7	1658.1	129.3	252.3	20	198	89	4.8	103.2	13	6.5	2039.7	165.1	-12	48	2.6	37	77.5
BT1112SWRLCP03SWPU	2011	89	Hochfilzen	10440	17	16	65	-1.5	93	F	23	102	2137.7	1697.2	74.9	263.6	26	232.9	102	43.9	48.8	27	3.8	2035.7	161.1	1	87.1	-0.1	51	23.1
BT1112SWRLCP03SWPU	2011	89	Hochfilzen	10440	17	16	65	-1.5	93	F	24	102	2145.1	1666.4	132.5	244.2	25	63.4	102	13.1	106.4	11	0.4	2043.1	168.5	1	56.3	-3.5	35	80.7
BT1112SWRLCP03SWPU	2011	89	Hochfilzen	10440	17	16	65	-1.5	93	F	25	102	2161.8	1651.9	157.7	250.2	27	225.5	102	-1.4	131.6	14	3.4	2059.8	185.2	1	41.8	-0.5	38	105.9
BT1112SWRLCP03SWPU	2011	89	Hochfilzen	10440	17	16	65	-1.5	93	F	27	166	2180.5	1674.7	104.1	235.7	59	331.9	166	21.4	78	-7	9.9	2014.5	139.9	65	64.6	6	17	52.3
BT1112SWRLCP03SWPU	2011	89	Hochfilzen	10440	17	16	65	-1.5	93	F	28	139	2185.3	1635	153.1	258.2	42	390.5	139	-18.3	127	20	5.4	2046.3	171.7	38	24.9	1.5	44	101.3
BT1112SWRLCP03SWPU	2011	89	Hochfilzen	10440	17	16	65	-1.5	93	F	29	76	2194	1664	181	273	16	307.8	76	10.7	154.9	29	11.2	2118	243.4	-25	53.9	7.3	53	129.2
BT1112SWRLCP03SWPU	2011	89	Hochfilzen	10440	17	16	65	-1.5	93	F	30	151	2196.8	1623.9	166.1	255.8	50	342.5	151	-29.4	140	14	9	2045.8	171.2	50	13.8	5.1	38	114.3
BT1112SWRLCP07SWPU	2011	93	Holmenkollen	10000	40	24	65	-14.7	89	F	21	75	2054.3	1517.4	243.9	218	7	36.5	75	-21.5	143.5	23.8	2.4	1979.3	182.7	4	-23.8	3.8	5.2	197.5
BT1112SWRLCP07SMPU	2011	93	Holmenkollen	10000	40	24	65	-14.7	89	F	1	0	1831.1	1538.9	100.4	191.8	1	383.7	0	0	0	0	0	1831.1	34.5	-71	-2.3	1.4	-18.6	54
BT1112SWRLCP07SWPU	2011	93	Holmenkollen	10000	40	24	65	-14.7	89	F	2	71	1867.6	1541.2	46.4	209	6	127.7	71	2.3	-54	18.6	-1.4	1796.6	0	0	0	0	0	0
BT1112SWRLCP07SWPU	2011	93	Holmenkollen	10000	40	24	65	-14.7	89	F	3	38	1882.5	1515	97	232.5	2	0	38	-23.9	-3.4	43.6	-2.9	1844.5	47.9	-33	-26.2	-1.5	25	50.6
BT1112SWRLCP07SWPU	2011	93	Holmenkollen	10000	40	24	65	-14.7	89	F	4	49	1896.9	1540.5	125.5	181.9	3	51.4	49	1.6	25.1	-8.7	-1.2	1847.9	51.3	-22	-0.7	0.2	-27.3	79.1
BT1112SWRLCP07SWPU	2011	93	Holmenkollen	10000	40	24	65	-14.7	89	F	5	81	1900.1	1487.3	117.2	214.6	9	183.9	81	-51.6	16.8	22.2	0.6	1819.1	22.5	10	-53.9	2	3.6	70.8
BT1112SWRLCP07SWPU	2011	93	Holmenkollen	10000	40	24	65	-14.7	89	F	6	109	1929.5	1555.5	73.3	191.7	19	224.1	109	16.6	-27.1	-0.2	0.1	1820.5	23.9	38	14.3	1.5	-18.8	26.9
BT1112SWRLCP07SWPU	2011	93	Holmenkollen	10000	40	24	65	-14.7	89	F	7	85	1933	1586.5	70.1	191.4	10	69	85	47.6	-30.3	-3.7	3.3	1848	51.4	14	45.3	4.7	-22.3	23.7
BT1112SWRLCP07SWPU	2011	93	Holmenkollen	10000	40	24	65	-14.7	89	F	8	56	1950	1555.6	147.3	191.1	4	65.8	56	16.7	46.9	0.4	-1.1	1894	97.4	-15	14.4	0.3	-18.2	100.9
BT1112SWRLCP07SWPU	2011	93	Holmenkollen	10000	40	24	65	-14.7	89	F	9	91	1951.3	1597.7	75.6	187	11	101.9	91	58.8	-24.8	-6.5	1.7	1860.3	63.7	20	56.5	3.1	-25.1	29.2
BT1112SWRLCP07SWPU	2011	93	Holmenkollen	10000	40	24	65	-14.7	89	F	10	106	1957.5	1530.2	121	200.3	16	213.7	106	-8.7	20.6	3	5.5	1851.5	54.9	35	-11	6.9	-15.6	74.6
BT1112SWRLCP07SWPU	2011	93	Holmenkollen	10000	40	24	65	-14.7	89	F	11	66	1958.8	1564.5	98.9	229.4	5	118.9	66	25.6	-1.5	26.3	11.3	1892.8	96.2	-5	23.3	12.7	7.7	52.5
BT1112SWRLCP07SWPU	2011	93	Holmenkollen	10000	40	24	65	-14.7	89	F	12	97	1977.8	1623.3	45.2	212.3	13	333.4	97	84.4	-55.2	12.3	8.2	1880.8	84.2	26	82.1	9.6	-6.3	-1.2
BT1112SWRLCP07SWPU	2011	93	Holmenkollen	10000	40	24	65	-14.7	89	F	13	114	1982.5	1572.6	95.5	200.4	21	157.7	114	33.7	-4.9	4.6	4	1868.5	71.9	43	31.4	5.4	-14	49.1
BT1112SWRLCP07SWPU	2011	93	Holmenkollen	10000	40	24	65	-14.7	89	F	14	112	1988.8	1574.4	73.3	229.1	20	98.4	112	35.5	-27.1	30.8	6.5	1876.8	80.2	41	33.2	7.9	12.2	26.9
BT1112SWRLCP07SWPU	2011	93	Holmenkollen	10000	40	24	65	-14.7	89	F	15	131	2002.2	1558.7	93.1	219.4	27	258.6	131	19.8	-7.3	24.8	2.8	1871.2	74.6	60	17.5	4.2	6.2	46.7
BT1112SWRLCP07SWPU	2011	93	Holmenkollen	10000	40	24	65	-14.7	89	F	16	128	2004.9	1595	71.9	210	24	227.4	128	56.1	-28.5	7.5	10.7	1876.9	80.3	57	53.8	12.1	-11.1	25.5
BT1112SWRLCP07SWPU	2011	93	Holmenkollen	10000	40	24	65	-14.7	89	F	17	80	2015	1520.8	197.1	217.1	8	223.2	80	-18.1	96.7	17.7	7.6	1935	138.4	9	-20.4	9	-0.9	150.7
BT1112SWRLCP07SWPU	2011	93	Holmenkollen	10000	40	24	65	-14.7	89	F	18	144	2033.5	1567.7	92.2	229.6	32	350.9	144	28.8	-8.2	36	1.8	1889.5	92.9	73	26.5	3.2	17.4	45.8
BT1112SWRLCP07SWPU	2011	93	Holmenkollen	10000	40	24	65	-14.7	89	F	19	101	2044.8	1569.2	146.3	228.3	15	223.2	101	30.3	45.9	32.6	3.9	1943.8	147.2	30	28	5.3	14	99.9
BT1112SWRLCP07SWPU	2011	93	Holmenkollen	10000	40	24	65	-14.7	89	F	20	133	2047.2	1630.1	75.6	208.5	29	239.2	133	91.2	-24.8	6	10.7	1914.2	117.6	62	88.9	12.1	-12.6	29.2
BT1112SWRLCP07SWPU	2011	93	Holmenkollen	10000	40	24	65	-14.7	89	F	22	98	2054.3	1581.3	149.8	225.2	14	146.7	98	42.4	49.4	28.5	4.9	1956.3	159.7	27	40.1	6.3	9.9	103.4
BT1112SWRLCP07SWPU	2011	93	Holmenkollen	10000	40	24	65	-14.7	89	F	23	108	2055.2	1605.5	102.5	239.2	18	338.2	108	66.6	2.1	42.3	5.1	1947.2	150.6	37	64.3	6.5	23.7	56.1
BT1112SWRLCP07SWPU	2011	93	Holmenkollen	10000	40	24	65	-14.7	89	F	24	119	2055.3	1673.2	72.9	190.2	22	151.4	119	134.3	-27.5	-11.9	10.3	1936.3	139.7	48	132	11.7	-30.5	26.5
BT1112SWRLCP07SWPU	2011	93	Holmenkollen	10000	40	24	65	-14.7	89	F	25	126	2058.5	1612.5	100.4	219.6	23	224.2	126	73.6	0	22.3	5.5	1932.5	135.9	55	71.3	6.9	3.7	54
BT1112SWRLCP07SWPU	2011	93	Holmenkollen	10000	40	24	65	-14.7	89	F	26	132	2070.3	1561.3	176.4	200.6	28	171.1	132	22.4	76	5.7	3.1	1938.3	141.7	61	20.1	4.5	-12.9	130
BT1112SWRLCP07SWPU	2011	93	Holmenkollen	10000	40	24	65	-14.7	89	F	27	153	2072.9	1612.1	105.5	202.3	37	338.6	153	73.2	5.1	1.6	8.9	1919.9	123.3	82	70.9	10.3	-17	59.1
BT1112SWRLCP07SWPU	2011	93	Holmenkollen	10000	40	24	65	-14.7	89	F	28	201	2082.7	1597.1	72.9	211.7	51	358.7	201	58.2	-27.5	11.5	8.4	1881.7	85.1	130	55.9	9.8	-7.1	26.5
BT1112SWRLCP07SWPU	2011	93	Holmenkollen	10000	40	24	65	-14.7	89	F	29	130	2089.7	1577	151	231.7	25	173.8	130	38.1	50.6	30.9	9	1959.7	163.1	59	35.8	10.4	12.3	104.6
BT1112SWRLCP07SWPU	2011	93	Holmenkollen	10000	40	24	65	-14.7	89	F	30	154	2101.7	1597.2	124.5	226	38	241.8	154	58.3	24.1	23.2	11	1947.7	151.1	83	56	12.4	4.6	78.1
BT1112SWRLCP08SWPU	2011	95	Kontiolahti	10446	28	21	66	-12.2	53	F	27	115	2302.9	1810.3	147.5	230.1	28	215.2	103	163.8	88.4	-13.5	18.2	2187.9	256.9	103	163.8	18.2	-13.5	88.4
BT1112SWRLCP08SWPU	2011	95	Kontiolahti	10446	28	21	66	-12.2	53	F	30	138	2309.8	1852.9	63.7	255.2	37	384.5	126	206.4	4.6	13.3	16.5	2171.8	240.8	126	206.4	16.5	13.3	4.6
BT1112SWRLCP08SWPU	2011	95	Kontiolahti	10446	28	21	66	-12.2	53	F	1	12	1943	1646.5	59.1	225.4	2	35.9	0	0	0	0	0	1931	0	0	0	0	0	0
BT1112SWRLCP08SMPU	2011	95	Kontiolahti	10446	28	21	66	-12.2	53	F	2	0	1978.9	1623.5	135.9	219.5	1	300.1	-12	-23	76.8	-7.2	1.3	1978.9	47.9	-12	-23	1.3	-7.2	76.8
BT1112SWRLCP08SWPU	2011	95	Kontiolahti	10446	28	21	66	-12.2	53	F	3	17	1980	1604.9	131.1	227	3	0	5	-41.6	72	3.7	-2.1	1963	32	5	-41.6	-2.1	3.7	72
BT1112SWRLCP08SWPU	2011	95	Kontiolahti	10446	28	21	66	-12.2	53	F	4	30	2014.7	1718	34.6	232.1	4	37	18	71.5	-24.5	5.5	1.2	1984.7	53.7	18	71.5	1.2	5.5	-24.5
BT1112SWRLCP08SWPU	2011	95	Kontiolahti	10446	28	21	66	-12.2	53	F	5	60	2046.2	1708.3	62.6	215.3	10	145.7	48	61.8	3.5	-8.3	-1.8	1986.2	55.2	48	61.8	-1.8	-8.3	3.5
BT1112SWRLCP08SWPU	2011	95	Kontiolahti	10446	28	21	66	-12.2	53	F	6	56	2077.4	1686.2	108.8	226.4	8	262.9	44	39.7	49.7	2.3	-1.3	2021.4	90.4	44	39.7	-1.3	2.3	49.7
BT1112SWRLCP08SWPU	2011	95	Kontiolahti	10446	28	21	66	-12.2	53	F	7	57	2088.7	1732.8	90.3	208.6	9	134.4	45	86.3	31.2	-8.1	-8.7	2031.7	100.7	45	86.3	-8.7	-8.1	31.2
BT1112SWRLCP08SWPU	2011	95	Kontiolahti	10446	28	21	66	-12.2	53	F	8	90	2091.5	1713.1	59.2	229.2	16	410.4	78	66.6	0.1	3.9	-0.1	2001.5	70.5	78	66.6	-0.1	3.9	0.1
BT1112SWRLCP08SWPU	2011	95	Kontiolahti	10446	28	21	66	-12.2	53	F	9	66	2123.5	1686.3	138.4	232.8	12	236.6	54	39.8	79.3	11.7	-4.3	2057.5	126.5	54	39.8	-4.3	11.7	79.3
BT1112SWRLCP08SWPU	2011	95	Kontiolahti	10446	28	21	66	-12.2	53	F	10	31	2134.4	1688.9	186.2	228.3	5	71.7	19	42.4	127.1	-4.4	7.3	2103.4	172.4	19	42.4	7.3	-4.4	127.1
BT1112SWRLCP08SWPU	2011	95	Kontiolahti	10446	28	21	66	-12.2	53	F	11	92	2141.2	1769.4	63.9	215.9	18	211.2	80	122.9	4.8	-10.6	1.1	2049.2	118.2	80	122.9	1.1	-10.6	4.8
BT1112SWRLCP08SWPU	2011	95	Kontiolahti	10446	28	21	66	-12.2	53	F	12	72	2144.1	1770.3	58.9	242.9	13	180.5	60	123.8	-0.2	15.9	1.6	2072.1	141.1	60	123.8	1.6	15.9	-0.2
BT1112SWRLCP08SWPU	2011	95	Kontiolahti	10446	28	21	66	-12.2	53	F	13	90	2154.2	1736.2	85.4	242.6	17	148.5	78	89.7	26.3	10.6	6.6	2064.2	133.2	78	89.7	6.6	10.6	26.3
BT1112SWRLCP08SWPU	2011	95	Kontiolahti	10446	28	21	66	-12.2	53	F	14	114	2158.2	1659.9	133.4	250.9	27	318.4	102	13.4	74.3	20.9	4.6	2044.2	113.2	102	13.4	4.6	20.9	74.3
BT1112SWRLCP08SWPU	2011	95	Kontiolahti	10446	28	21	66	-12.2	53	F	15	106	2176.8	1710.5	137.2	223.1	23	438.7	94	64	78.1	0.1	-2.4	2070.8	139.8	94	64	-2.4	0.1	78.1
BT1112SWRLCP08SWPU	2011	95	Kontiolahti	10446	28	21	66	-12.2	53	F	16	65	2179.6	1693.3	156.8	264.5	11	103.2	53	46.8	97.7	42.5	-3.4	2114.6	183.6	53	46.8	-3.4	42.5	97.7
BT1112SWRLCP08SWPU	2011	95	Kontiolahti	10446	28	21	66	-12.2	53	F	17	43	2205.9	1747.8	174.5	240.6	7	288.8	31	101.3	115.4	14.1	1.1	2162.9	231.9	31	101.3	1.1	14.1	115.4
BT1112SWRLCP08SWPU	2011	95	Kontiolahti	10446	28	21	66	-12.2	53	F	18	104	2214.3	1785.3	90.2	234.8	21	384.5	92	138.8	31.1	-4.9	14.3	2110.3	179.3	92	138.8	14.3	-4.9	31.1
BT1112SWRLCP08SWPU	2011	95	Kontiolahti	10446	28	21	66	-12.2	53	F	19	78	2231.7	1768.3	140.7	244.7	14	201.1	66	121.8	81.6	21.8	-2.5	2153.7	222.7	66	121.8	-2.5	21.8	81.6
BT1112SWRLCP08SWPU	2011	95	Kontiolahti	10446	28	21	66	-12.2	53	F	20	33	2231.8	1698.3	245.7	254.8	6	191.4	21	51.8	186.6	32.7	-3.3	2198.8	267.8	21	51.8	-3.3	32.7	186.6
BT1112SWRLCP08SWPU	2011	95	Kontiolahti	10446	28	21	66	-12.2	53	F	21	125	2243	1735.4	143.8	238.8	30	491.4	113	88.9	84.7	10.2	3.2	2118	187	113	88.9	3.2	10.2	84.7
BT1112SWRLCP08SWPU	2011	95	Kontiolahti	10446	28	21	66	-12.2	53	F	22	114	2261.4	1760.6	168	218.8	26	361.2	102	114.1	108.9	-4.5	-2.1	2147.4	216.4	102	114.1	-2.1	-4.5	108.9
BT1112SWRLCP08SWPU	2011	95	Kontiolahti	10446	28	21	66	-12.2	53	F	23	128	2267.9	1748.2	146.7	245	32	428.2	116	101.7	87.6	10	9.6	2139.9	208.9	116	101.7	9.6	10	87.6
BT1112SWRLCP08SWPU	2011	95	Kontiolahti	10446	28	21	66	-12.2	53	F	24	150	2275.7	1737.2	165.9	222.6	41	401.9	138	90.7	106.8	-4.1	1.3	2125.7	194.7	138	90.7	1.3	-4.1	106.8
BT1112SWRLCP08SWPU	2011	95	Kontiolahti	10446	28	21	66	-12.2	53	F	25	110	2296.6	1731.5	205.6	249.5	24	233.8	98	85	146.5	19.2	4.9	2186.6	255.6	98	85	4.9	19.2	146.5
BT1112SWRLCP08SWPU	2011	95	Kontiolahti	10446	28	21	66	-12.2	53	F	26	160	2297.5	1779	126.3	232.2	44	402.1	148	132.5	67.2	1.1	5.7	2137.5	206.5	148	132.5	5.7	1.1	67.2
BT1112SWRLCP08SWPU	2011	95	Kontiolahti	10446	28	21	66	-12.2	53	F	28	112	2304.2	1783	171.6	237.6	25	353.6	100	136.5	112.5	16.9	-4.7	2192.2	261.2	100	136.5	-4.7	16.9	112.5
BT1112SWRLCP08SWPU	2011	95	Kontiolahti	10446	28	21	66	-12.2	53	F	29	131	2306.2	1816.4	116.8	242	34	374.1	119	169.9	57.7	14.4	2.2	2175.2	244.2	119	169.9	2.2	14.4	57.7
BT1112SWRLCP09SWPU	2011	97	Khanty	10290	36	21	52	-6	97	F	13	86	2102.6	1679.8	85.7	251.1	19	249.3	70	31.1	-1.3	-10.3	48.6	2016.6	68.1	70	31.1	48.6	-10.3	-1.3
BT1112SWRLCP09SWPU	2011	97	Khanty	10290	36	21	52	-6	97	F	21	129	2190.1	1782.4	64	214.7	28	412.2	113	133.7	-23	27.8	-25.9	2061.1	112.6	113	133.7	-25.9	27.8	-23
BT1112SWRLCP09SWPU	2011	97	Khanty	10290	36	21	52	-6	97	F	24	144	2205.8	1750.4	95.7	215.7	33	203.8	128	101.7	8.7	22.9	-20	2061.8	113.3	128	101.7	-20	22.9	8.7
BT1112SWRLCP09SWPU	2011	97	Khanty	10290	36	21	52	-6	97	F	1	16	1964.5	1648.7	87	212.8	3	32.1	0	0	0	0	0	1948.5	0	0	0	0	0	0
BT1112SWRLCP09SWPU	2011	97	Khanty	10290	36	21	52	-6	97	F	2	18	1989.3	1651.4	87.6	232.3	4	0	2	2.7	0.6	16.3	3.2	1971.3	22.8	2	2.7	3.2	16.3	0.6
BT1112SWRLCP09SWPU	2011	97	Khanty	10290	36	21	52	-6	97	F	3	3	1996.6	1704.9	96.5	192.2	2	54.2	-13	56.2	9.5	-22.3	1.7	1993.6	45.1	-13	56.2	1.7	-22.3	9.5
BT1112SWRLCP09SMPU	2011	97	Khanty	10290	36	21	52	-6	97	F	4	0	2018.7	1654.7	171	193	1	454	-16	6	84	-20.4	0.6	2018.7	70.2	-16	6	0.6	-20.4	84
BT1112SWRLCP09SWPU	2011	97	Khanty	10290	36	21	52	-6	97	F	5	39	2028	1730.7	65.3	193	7	95	23	82	-21.7	-22.2	2.4	1989	40.5	23	82	2.4	-22.2	-21.7
BT1112SWRLCP09SWPU	2011	97	Khanty	10290	36	21	52	-6	97	F	6	65	2038.6	1742.5	34.1	197	11	115.1	49	93.8	-52.9	-27.9	12.1	1973.6	25.1	49	93.8	12.1	-27.9	-52.9
BT1112SWRLCP09SWPU	2011	97	Khanty	10290	36	21	52	-6	97	F	7	29	2059.5	1733.6	90	206.9	6	127.5	13	84.9	3	-14.5	8.6	2030.5	82	13	84.9	8.6	-14.5	3
BT1112SWRLCP09SWPU	2011	97	Khanty	10290	36	21	52	-6	97	F	8	88	2078.3	1702.2	88.4	199.7	20	138.1	72	53.5	1.4	-14.9	1.8	1990.3	41.8	72	53.5	1.8	-14.9	1.4
BT1112SWRLCP09SWPU	2011	97	Khanty	10290	36	21	52	-6	97	F	9	63	2079.6	1726.2	63.5	226.9	10	134.9	47	77.5	-23.5	15.6	-1.5	2016.6	68.1	47	77.5	-1.5	15.6	-23.5
BT1112SWRLCP09SWPU	2011	97	Khanty	10290	36	21	52	-6	97	F	10	75	2085.5	1708.6	92.8	209.1	14	214.8	59	59.9	5.8	-12.5	8.8	2010.5	62	59	59.9	8.8	-12.5	5.8
BT1112SWRLCP09SWPU	2011	97	Khanty	10290	36	21	52	-6	97	F	11	25	2092	1711.3	142.3	213.4	5	24.8	9	62.6	55.3	-2.6	3.2	2067	118.5	9	62.6	3.2	-2.6	55.3
BT1112SWRLCP09SWPU	2011	97	Khanty	10290	36	21	52	-6	97	F	12	62	2099.4	1710.8	91.1	235.5	9	148.7	46	62.1	4.1	22.7	0	2037.4	88.9	46	62.1	0	22.7	4.1
BT1112SWRLCP09SWPU	2011	97	Khanty	10290	36	21	52	-6	97	F	14	105	2108.4	1706.6	90.5	206.3	23	277.6	89	57.9	3.5	-14.7	8.2	2003.4	54.9	89	57.9	8.2	-14.7	3.5
BT1112SWRLCP09SWPU	2011	97	Khanty	10290	36	21	52	-6	97	F	15	57	2113.2	1734.2	117	205	8	63.5	41	85.5	30	-12.3	4.5	2056.2	107.7	41	85.5	4.5	-12.3	30
BT1112SWRLCP09SWPU	2011	97	Khanty	10290	36	21	52	-6	97	F	16	141	2168.3	1761.9	62.9	202.5	32	212.3	125	113.2	-24.1	-16.4	6.1	2027.3	78.8	125	113.2	6.1	-16.4	-24.1
BT1112SWRLCP09SWPU	2011	97	Khanty	10290	36	21	52	-6	97	F	17	137	2176.8	1749.7	64	226.1	31	364.6	121	101	-23	11.6	1.7	2039.8	91.3	121	101	1.7	11.6	-23
BT1112SWRLCP09SWPU	2011	97	Khanty	10290	36	21	52	-6	97	F	18	69	2178.9	1729.2	177.7	203	12	74.1	53	80.5	90.7	-16	6.2	2109.9	161.4	53	80.5	6.2	-16	90.7
BT1112SWRLCP09SWPU	2011	97	Khanty	10290	36	21	52	-6	97	F	19	69	2179.3	1682.9	200.7	226.7	13	214.4	53	34.2	113.7	10.1	3.8	2110.3	161.8	53	34.2	3.8	10.1	113.7
BT1112SWRLCP09SWPU	2011	97	Khanty	10290	36	21	52	-6	97	F	20	108	2180.8	1749.5	119.3	204	24	143.9	92	100.8	32.3	-8.5	-0.3	2072.8	124.3	92	100.8	-0.3	-8.5	32.3
BT1112SWRLCP09SWPU	2011	97	Khanty	10290	36	21	52	-6	97	F	22	113	2197.9	1750.6	92.3	242	26	236.6	97	101.9	5.3	29.7	-0.5	2084.9	136.4	97	101.9	-0.5	29.7	5.3
BT1112SWRLCP09SWPU	2011	97	Khanty	10290	36	21	52	-6	97	F	23	112	2201.1	1764.5	123.4	201.2	25	216.3	96	115.8	36.4	-8.8	-2.8	2089.1	140.6	96	115.8	-2.8	-8.8	36.4
BT1112SWRLCP09SWPU	2011	97	Khanty	10290	36	21	52	-6	97	F	25	81	2209.9	1707.3	200.9	220.7	16	291.1	65	58.6	113.9	5.7	2.2	2128.9	180.4	65	58.6	2.2	5.7	113.9
BT1112SWRLCP09SWPU	2011	97	Khanty	10290	36	21	52	-6	97	F	26	145	2210.5	1725.5	122.9	217.1	34	241.3	129	76.8	35.9	-1.4	5.7	2065.5	117	129	76.8	5.7	-1.4	35.9
BT1112SWRLCP09SWPU	2011	97	Khanty	10290	36	21	52	-6	97	F	27	146	2212.4	1727.8	123.8	214.8	35	246	130	79.1	36.8	-3.5	5.5	2066.4	117.9	130	79.1	5.5	-3.5	36.8
BT1112SWRLCP09SWPU	2011	97	Khanty	10290	36	21	52	-6	97	F	28	86	2213.8	1741.5	180.7	205.6	18	312.4	70	92.8	93.7	-18	10.8	2127.8	179.3	70	92.8	10.8	-18	93.7
BT1112SWRLCP09SWPU	2011	97	Khanty	10290	36	21	52	-6	97	F	29	152	2224.5	1802.9	67.9	201.7	38	405.8	136	154.2	-19.1	-14.9	3.8	2072.5	124	136	154.2	3.8	-14.9	-19.1
BT1112SWRLCP09SWPU	2011	97	Khanty	10290	36	21	52	-6	97	F	30	165	2225.1	1773.2	69.5	217.4	44	275.2	149	124.5	-17.5	-1.2	5.8	2060.1	111.6	149	124.5	5.8	-1.2	-17.5
BT1112SWRLCH__SMPU	2011	99	Ruhpolding	10450	26	18	64	9.8	98	F	2	0	1804.7	1533.9	90	180.8	1	175.2	-15	39.8	27.1	-16	-10.8	1804.7	40.1	-15	39.8	-10.8	-16	27.1
BT1112SWRLCH__SWPU	2011	99	Ruhpolding	10450	26	18	64	9.8	98	F	1	15	1779.6	1494.1	62.9	207.6	2	25.1	0	0	0	0	0	1764.6	0	0	0	0	0	0
BT1112SWRLCH__SWPU	2011	99	Ruhpolding	10450	26	18	64	9.8	98	F	15	107	1964	1632.7	19.8	204.5	17	118.6	92	138.6	-43.1	-20	16.9	1857	92.4	92	138.6	16.9	-20	-43.1
BT1112SWRLCH__SWPU	2011	99	Ruhpolding	10450	26	18	64	9.8	98	F	3	65	1855	1568.5	43.4	178.1	8	184.9	50	74.4	-19.5	-38	8.5	1790	25.4	50	74.4	8.5	-38	-19.5
BT1112SWRLCH__SWPU	2011	99	Ruhpolding	10450	26	18	64	9.8	98	F	4	52	1865.4	1534.4	92.7	186.3	6	91.1	37	40.3	29.8	-29	7.7	1813.4	48.8	37	40.3	7.7	-29	29.8
BT1112SWRLCH__SWPU	2011	99	Ruhpolding	10450	26	18	64	9.8	98	F	5	45	1867.9	1559.6	64.8	198.5	4	125.7	30	65.5	1.9	-18	8.9	1822.9	58.3	30	65.5	8.9	-18	1.9
BT1112SWRLCH__SWPU	2011	99	Ruhpolding	10450	26	18	64	9.8	98	F	6	47	1870.7	1570.6	66.3	186.8	5	88.3	32	76.5	3.4	-33	12.2	1823.7	59.1	32	76.5	12.2	-33	3.4
BT1112SWRLCH__SWPU	2011	99	Ruhpolding	10450	26	18	64	9.8	98	F	7	106	1898.2	1553.4	42.7	196.1	16	233.1	91	59.3	-20.2	-20	8.5	1792.2	27.6	91	59.3	8.5	-20	-20.2
BT1112SWRLCH__SWPU	2011	99	Ruhpolding	10450	26	18	64	9.8	98	F	8	38	1905.3	1570.1	94.4	202.8	3	0	23	76	31.5	-14	9.2	1867.3	102.7	23	76	9.2	-14	31.5
BT1112SWRLCH__SWPU	2011	99	Ruhpolding	10450	26	18	64	9.8	98	F	9	74	1917.9	1608.2	42.4	193.3	9	75.4	59	114.1	-20.5	-23	8.7	1843.9	79.3	59	114.1	8.7	-23	-20.5
BT1112SWRLCH__SWPU	2011	99	Ruhpolding	10450	26	18	64	9.8	98	F	10	93	1921.9	1615.8	18.1	195	13	164.9	78	121.7	-44.8	-24	11.4	1828.9	64.3	78	121.7	11.4	-24	-44.8
BT1112SWRLCH__SWPU	2011	99	Ruhpolding	10450	26	18	64	9.8	98	F	11	157	1933.1	1555.4	18.4	202.3	34	283.2	142	61.3	-44.5	-10	4.7	1776.1	11.5	142	61.3	4.7	-10	-44.5
BT1112SWRLCH__SWPU	2011	99	Ruhpolding	10450	26	18	64	9.8	98	F	12	85	1935.5	1581.5	63.7	205.3	11	199.2	70	87.4	0.8	-15	12.7	1850.5	85.9	70	87.4	12.7	-15	0.8
BT1112SWRLCH__SWPU	2011	99	Ruhpolding	10450	26	18	64	9.8	98	F	13	93	1944.5	1576.1	65.7	209.7	12	155.9	78	82	2.8	-6	8.1	1851.5	86.9	78	82	8.1	-6	2.8
BT1112SWRLCH__SWPU	2011	99	Ruhpolding	10450	26	18	64	9.8	98	F	14	115	1949.2	1553.3	85.8	195.1	22	251	100	59.2	22.9	-23	10.5	1834.2	69.6	100	59.2	10.5	-23	22.9
BT1112SWRLCH__SWPU	2011	99	Ruhpolding	10450	26	18	64	9.8	98	F	16	64	1964.5	1600.9	92.5	207.1	7	85.8	49	106.8	29.6	-10	9.5	1900.5	135.9	49	106.8	9.5	-10	29.6
BT1112SWRLCH__SWPU	2011	99	Ruhpolding	10450	26	18	64	9.8	98	F	17	110	1968.8	1594.1	64.9	199.8	20	254	95	100	2	-19	11.2	1858.8	94.2	95	100	11.2	-19	2
BT1112SWRLCH__SWPU	2011	99	Ruhpolding	10450	26	18	64	9.8	98	F	18	135	1975.9	1585.7	67.7	187.5	25	276.9	120	91.6	4.8	-30	9.9	1840.9	76.3	120	91.6	9.9	-30	4.8
BT1112SWRLCH__SWPU	2011	99	Ruhpolding	10450	26	18	64	9.8	98	F	19	80	1978.8	1566.4	133.1	199.3	10	138.3	65	72.3	70.2	-18	9.7	1898.8	134.2	65	72.3	9.7	-18	70.2
BT1112SWRLCH__SWPU	2011	99	Ruhpolding	10450	26	18	64	9.8	98	F	20	142	1985.5	1521.6	111.1	210.8	27	276.1	127	27.5	48.2	-4	7.2	1843.5	78.9	127	27.5	7.2	-4	48.2
BT1112SWRLCH__SWPU	2011	99	Ruhpolding	10450	26	18	64	9.8	98	F	21	99	1985.6	1564.3	110.3	212	14	142.3	84	70.2	47.4	-7	11.4	1886.6	122	84	70.2	11.4	-7	47.4
BT1112SWRLCH__SWPU	2011	99	Ruhpolding	10450	26	18	64	9.8	98	F	22	169	1986.6	1535.4	62.3	219.9	37	340.5	154	41.3	-0.6	8	4.3	1817.6	53	154	41.3	4.3	8	-0.6
BT1112SWRLCH__SWPU	2011	99	Ruhpolding	10450	26	18	64	9.8	98	F	23	170	1991.7	1583.6	18.9	219.2	41	359	155	89.5	-44	1	10.6	1821.7	57.1	155	89.5	10.6	1	-44
BT1112SWRLCH__SWPU	2011	99	Ruhpolding	10450	26	18	64	9.8	98	F	24	151	1998.6	1543.7	91.2	212.7	32	259.6	136	49.6	28.3	-7	12.1	1847.6	83	136	49.6	12.1	-7	28.3
BT1112SWRLCH__SWPU	2011	99	Ruhpolding	10450	26	18	64	9.8	98	F	25	101	2012.7	1586.8	92.4	232.5	15	206	86	92.7	29.5	14	10.9	1911.7	147.1	86	92.7	10.9	14	29.5
BT1112SWRLCH__SWPU	2011	99	Ruhpolding	10450	26	18	64	9.8	98	F	26	108	2026.2	1572.3	135.9	210	18	184.4	93	78.2	73	-7	9.4	1918.2	153.6	93	78.2	9.4	-7	73
BT1112SWRLCH__SWPU	2011	99	Ruhpolding	10450	26	18	64	9.8	98	F	27	115	2030.6	1602.6	93	220	21	189.2	100	108.5	30.1	4	8.4	1915.6	151	100	108.5	8.4	4	30.1
BT1112SWRLCH__SWPU	2011	99	Ruhpolding	10450	26	18	64	9.8	98	F	28	110	2033.6	1559.9	134.1	229.6	19	246.6	95	65.8	71.2	18	4	1923.6	159	95	65.8	4	18	71.2
BT1112SWRLCH__SWPU	2011	99	Ruhpolding	10450	26	18	64	9.8	98	F	29	148	2039.2	1619.1	42.8	229.3	31	294.8	133	125	-20.1	11	10.7	1891.2	126.6	133	125	10.7	11	-20.1
BT1112SWRLCH__SWPU	2011	99	Ruhpolding	10450	26	18	64	9.8	98	F	30	144	2046	1617.4	64.8	219.8	28	205.9	129	123.3	1.9	3	9.2	1902	137.4	129	123.3	9.2	3	1.9
BT1516SWRLCP01SMPU	2015	19	Oestersund	12389	29	25	75	1.5	76	M	12	127	1976.8	1613.1	70.9	165.8	19	94.4	127	18.2	-23	-34.7	6.9	1849.8	50.5	-13	66.4	1.8	-21.2	3.5
BT1516SWRLCP01SMPU	2015	19	Oestersund	12389	29	25	75	1.5	76	M	15	143	1989.9	1597.8	67.9	181.2	32	107.5	143	2.9	-26	-26.1	13.7	1846.9	47.6	3	51.1	8.6	-12.6	0.5
BT1516SWRLCP01SMPU	2015	19	Oestersund	12389	29	25	75	1.5	76	M	16	71	1991.4	1558.9	178.2	183.3	6	109	71	-36	84.3	-15.4	5.1	1920.4	121.1	-69	12.2	0	-1.9	110.8
BT1516SWRLCP01SMPU	2015	19	Oestersund	12389	29	25	75	1.5	76	M	20	132	2010.3	1572.9	88.5	216.9	24	127.9	132	-22	-5.4	26.2	-2.9	1878.3	79	-8	26.2	-8	39.7	21.1
BT1516SWRLCP01SMPU	2015	19	Oestersund	12389	29	25	75	1.5	76	M	22	155	2014.7	1624	45.2	190.5	39	132.3	155	29.1	-48.7	-14.5	11.4	1859.7	60.4	15	77.3	6.3	-1	-22.2
BT1516SWRLCP01SMPU	2015	19	Oestersund	12389	29	25	75	1.5	76	M	30	93	2051.2	1658.8	97.7	201.7	10	168.8	93	63.9	3.8	4.3	3.8	1958.2	158.9	-47	112.1	-1.3	17.8	30.3
BT1516SWRLCP01SMPU	2015	19	Oestersund	12389	29	25	75	1.5	76	M	1	0	1882.4	1594.9	93.9	193.6	1	0	0	0	0	0	0	1882.4	83.1	-140	48.2	-5.1	13.5	26.5
BT1516SWRLCP01SMPU	2015	19	Oestersund	12389	29	25	75	1.5	76	M	2	52	1917.5	1628.9	47.9	188.7	2	35.1	52	34	-46	-6.4	1.5	1865.5	66.2	-88	82.2	-3.6	7.1	-19.5
BT1516SWRLCP01SMPU	2015	19	Oestersund	12389	29	25	75	1.5	76	M	3	64	1937.6	1614	72.1	187.5	4	55.2	64	19.1	-21.8	-8.9	2.8	1873.6	74.3	-76	67.3	-2.3	4.6	4.7
BT1516SWRLCP01SMPU	2015	19	Oestersund	12389	29	25	75	1.5	76	M	4	140	1939.3	1546.7	67.4	185.2	29	56.9	140	-48.2	-26.5	-13.5	5.1	1799.3	0	0	0	0	0	0
BT1516SWRLCP01SMPU	2015	19	Oestersund	12389	29	25	75	1.5	76	M	5	71	1941.4	1588.4	93.9	188.1	7	59	71	-6.5	0	-7.6	2.1	1870.4	71.1	-69	41.7	-3	5.9	26.5
BT1516SWRLCP01SMPU	2015	19	Oestersund	12389	29	25	75	1.5	76	M	6	69	1944	1584.5	91.6	198.9	5	61.6	69	-10.4	-2.3	1.3	4	1875	75.7	-71	37.8	-1.1	14.8	24.2
BT1516SWRLCP01SMPU	2015	19	Oestersund	12389	29	25	75	1.5	76	M	7	144	1948.1	1568.5	45.2	190.4	34	65.7	144	-26.4	-48.7	-3.5	0.3	1804.1	4.8	4	21.8	-4.8	10	-22.2
BT1516SWRLCP01SMPU	2015	19	Oestersund	12389	29	25	75	1.5	76	M	8	137	1952.1	1603.9	23.1	188.1	27	69.7	137	9	-70.8	-8.1	2.6	1815.1	15.8	-3	57.2	-2.5	5.4	-44.3
BT1516SWRLCP01SMPU	2015	19	Oestersund	12389	29	25	75	1.5	76	M	9	77	1954.1	1610.1	73.8	193.2	8	71.7	77	15.2	-20.1	-4.3	3.9	1877.1	77.8	-63	63.4	-1.2	9.2	6.4
BT1516SWRLCP01SMPU	2015	19	Oestersund	12389	29	25	75	1.5	76	M	10	82	1957.5	1605.3	89.7	180.5	9	75.1	82	10.4	-4.2	-11	-2.1	1875.5	76.2	-58	58.6	-7.2	2.5	22.3
BT1516SWRLCP01SMPU	2015	19	Oestersund	12389	29	25	75	1.5	76	M	11	55	1966.4	1599.8	135.2	176.4	3	84	55	4.9	41.3	-13.7	-3.5	1911.4	112.1	-85	53.1	-8.6	-0.2	67.8
BT1516SWRLCP01SMPU	2015	19	Oestersund	12389	29	25	75	1.5	76	M	13	126	1980.2	1570.1	92.7	191.4	18	97.8	126	-24.8	-1.2	-8.2	6	1854.2	54.9	-14	23.4	0.9	5.3	25.3
BT1516SWRLCP01SMPU	2015	19	Oestersund	12389	29	25	75	1.5	76	M	14	179	1983.1	1585.1	22.9	196.1	49	100.7	179	-9.8	-71	-0.4	2.9	1804.1	4.8	39	38.4	-2.2	13.1	-44.5
BT1516SWRLCP01SMPU	2015	19	Oestersund	12389	29	25	75	1.5	76	M	17	130	1997.3	1583	87	197.3	21	114.9	130	-11.9	-6.9	-1.9	5.6	1867.3	68	-10	36.3	0.5	11.6	19.6
BT1516SWRLCP01SMPU	2015	19	Oestersund	12389	29	25	75	1.5	76	M	18	172	2003.6	1603.9	44.1	183.6	47	121.2	172	9	-49.8	-14.2	4.2	1831.6	32.3	32	57.2	-0.9	-0.7	-23.3
BT1516SWRLCP01SMPU	2015	19	Oestersund	12389	29	25	75	1.5	76	M	19	156	2003.9	1610.5	45.3	192.1	40	121.5	156	15.6	-48.6	-3.9	2.4	1847.9	48.6	16	63.8	-2.7	9.6	-22.1
BT1516SWRLCP01SMPU	2015	19	Oestersund	12389	29	25	75	1.5	76	M	21	130	2013.7	1610.7	66	207	22	131.3	130	15.8	-27.9	9.1	4.3	1883.7	84.4	-10	64	-0.8	22.6	-1.4
BT1516SWRLCP01SMPU	2015	19	Oestersund	12389	29	25	75	1.5	76	M	23	106	2019.5	1630.9	89.4	193.2	11	137.1	106	36	-4.5	-1.9	1.5	1913.5	114.2	-34	84.2	-3.6	11.6	22
BT1516SWRLCP01SMPU	2015	19	Oestersund	12389	29	25	75	1.5	76	M	24	115	2020.7	1616.2	89.4	200.1	13	138.3	115	21.3	-4.5	6	0.5	1905.7	106.4	-25	69.5	-4.6	19.5	22
BT1516SWRLCP01SMPU	2015	19	Oestersund	12389	29	25	75	1.5	76	M	25	198	2021.2	1597.9	46	179.3	58	138.8	198	3	-47.9	-18.7	4.4	1823.2	23.9	58	51.2	-0.7	-5.2	-21.4
BT1516SWRLCP01SMPU	2015	19	Oestersund	12389	29	25	75	1.5	76	M	26	129	2025.1	1622.4	66.8	206.9	20	142.7	129	27.5	-27.1	7.9	5.4	1896.1	96.8	-11	75.7	0.3	21.4	-0.6
BT1516SWRLCP01SMPU	2015	19	Oestersund	12389	29	25	75	1.5	76	M	27	142	2028.8	1614	70.5	202.3	30	146.4	142	19.1	-23.4	5.1	3.6	1886.8	87.5	2	67.3	-1.5	18.6	3.1
BT1516SWRLCP01SMPU	2015	19	Oestersund	12389	29	25	75	1.5	76	M	28	143	2036.5	1585.8	110.3	197.4	31	154.1	143	-9.1	16.4	-3.1	6.9	1893.5	94.2	3	39.1	1.8	10.4	42.9
BT1516SWRLCP01SMPU	2015	19	Oestersund	12389	29	25	75	1.5	76	M	29	160	2038.8	1626.9	69.6	182.3	42	156.4	160	32	-24.3	-17.8	6.5	1878.8	79.5	20	80.2	1.4	-4.3	2.2
BT1516SWRLCP02SMPU	2015	21	Hochfilzen	12798	31	28	86	1.8	63	M	26	93	2032.6	1662.7	41.1	235.8	36	152.7	83	48.3	-24.4	44	1.8	1939.6	72	8	12.8	4.4	34	20.8
BT1516SWRLCP02SMPU	2015	21	Hochfilzen	12798	31	28	86	1.8	63	M	30	33	2058.4	1630.7	187.2	207.5	7	178.5	23	16.3	121.7	13	4.5	2025.4	157.8	-52	-19.2	7.1	3	166.9
BT1516SWRLCP02SMPU	2015	21	Hochfilzen	12798	31	28	86	1.8	63	M	1	10	1879.9	1614.4	65.5	190	2	0	0	0	0	0	0	1869.9	2.3	-75	-35.5	2.6	-10	45.2
BT1516SWRLCP02SMPU	2015	21	Hochfilzen	12798	31	28	86	1.8	63	M	2	0	1888.8	1643.3	43	202.5	1	8.9	-10	28.9	-22.5	14	-1.5	1888.8	21.2	-85	-6.6	1.1	4	22.7
BT1516SWRLCP02SMPU	2015	21	Hochfilzen	12798	31	28	86	1.8	63	M	3	21	1899	1624	63.2	190.8	4	19.1	11	9.6	-2.3	1	-0.2	1878	10.4	-64	-25.9	2.4	-9	42.9
BT1516SWRLCP02SMPU	2015	21	Hochfilzen	12798	31	28	86	1.8	63	M	4	19	1911.1	1620.6	64.5	207	3	31.2	9	6.2	-1	14	3	1892.1	24.5	-66	-29.3	5.6	4	44.2
BT1516SWRLCP02SMPU	2015	21	Hochfilzen	12798	31	28	86	1.8	63	M	5	41	1919.7	1625.5	44.6	208.6	13	39.8	31	11.1	-20.9	12	6.6	1878.7	11.1	-44	-24.4	9.2	2	24.3
BT1516SWRLCP02SMPU	2015	21	Hochfilzen	12798	31	28	86	1.8	63	M	6	47	1937.4	1628.9	63.9	197.6	16	57.5	37	14.5	-1.6	6	1.6	1890.4	22.8	-38	-21	4.2	-4	43.6
BT1516SWRLCP02SMPU	2015	21	Hochfilzen	12798	31	28	86	1.8	63	M	7	38	1939.4	1620.2	66.6	214.6	10	59.5	28	5.8	1.1	19	5.6	1901.4	33.8	-47	-29.7	8.2	9	46.3
BT1516SWRLCP02SMPU	2015	21	Hochfilzen	12798	31	28	86	1.8	63	M	8	56	1940.5	1641.7	41.4	201.4	19	60.6	46	27.3	-24.1	17	-5.6	1884.5	16.9	-29	-8.2	-3	7	21.1
BT1516SWRLCP02SMPU	2015	21	Hochfilzen	12798	31	28	86	1.8	63	M	9	70	1941.3	1652.9	19.5	198.9	21	61.4	60	38.5	-46	6	2.9	1871.3	3.7	-15	3	5.5	-4	-0.8
BT1516SWRLCP02SMPU	2015	21	Hochfilzen	12798	31	28	86	1.8	63	M	10	71	1945.8	1634.9	39.1	200.8	22	65.9	61	20.5	-26.4	14	-3.2	1874.8	7.2	-14	-15	-0.6	4	18.8
BT1516SWRLCP02SMPU	2015	21	Hochfilzen	12798	31	28	86	1.8	63	M	11	85	1952.6	1649.9	20.3	197.4	29	72.7	75	35.5	-45.2	10	-2.6	1867.6	0	0	0	0	0	0
BT1516SWRLCP02SMPU	2015	21	Hochfilzen	12798	31	28	86	1.8	63	M	12	39	1953.3	1645.7	86	182.6	11	73.4	29	31.3	20.5	-11	3.6	1914.3	46.7	-46	-4.2	6.2	-21	65.7
BT1516SWRLCP02SMPU	2015	21	Hochfilzen	12798	31	28	86	1.8	63	M	13	41	1959.9	1658.1	41.8	219	12	80	31	43.7	-23.7	22	7	1918.9	51.3	-44	8.2	9.6	12	21.5
BT1516SWRLCP02SMPU	2015	21	Hochfilzen	12798	31	28	86	1.8	63	M	14	33	1969.9	1643.1	88.7	205.1	6	90	23	28.7	23.2	15	0.1	1936.9	69.3	-52	-6.8	2.7	5	68.4
BT1516SWRLCP02SMPU	2015	21	Hochfilzen	12798	31	28	86	1.8	63	M	15	61	1970.2	1653.1	63	193.1	20	90.3	51	38.7	-2.5	5	-1.9	1909.2	41.6	-24	3.2	0.7	-5	42.7
BT1516SWRLCP02SMPU	2015	21	Hochfilzen	12798	31	28	86	1.8	63	M	16	28	1970.5	1646	85.5	211	5	90.6	18	31.6	20	21	0	1942.5	74.9	-57	-3.9	2.6	11	65.2
BT1516SWRLCP02SMPU	2015	21	Hochfilzen	12798	31	28	86	1.8	63	M	17	45	1985.7	1644.7	84.9	211.1	15	105.8	35	30.3	19.4	16	5.1	1940.7	73.1	-40	-5.2	7.7	6	64.6
BT1516SWRLCP02SMPU	2015	21	Hochfilzen	12798	31	28	86	1.8	63	M	18	50	1988.3	1640.2	108.2	189.9	18	108.4	40	25.8	42.7	1	-1.1	1938.3	70.7	-35	-9.7	1.5	-9	87.9
BT1516SWRLCP02SMPU	2015	21	Hochfilzen	12798	31	28	86	1.8	63	M	19	35	1990.6	1636.5	105.8	213.3	8	110.7	25	22.1	40.3	20	3.3	1955.6	88	-50	-13.4	5.9	10	85.5
BT1516SWRLCP02SMPU	2015	21	Hochfilzen	12798	31	28	86	1.8	63	M	20	72	1990.8	1645.3	63.3	210.2	24	110.9	62	30.9	-2.2	23	-2.8	1918.8	51.2	-13	-4.6	-0.2	13	43
BT1516SWRLCP02SMPU	2015	21	Hochfilzen	12798	31	28	86	1.8	63	M	21	72	1991.8	1658.8	40.8	220.2	23	111.9	62	44.4	-24.7	35	-4.8	1919.8	52.2	-13	8.9	-2.2	25	20.5
BT1516SWRLCP02SMPU	2015	21	Hochfilzen	12798	31	28	86	1.8	63	M	22	38	1992.5	1666.8	83.5	204.2	9	112.6	28	52.4	18	15	-0.8	1954.5	86.9	-47	16.9	1.8	5	63.2
BT1516SWRLCP02SMPU	2015	21	Hochfilzen	12798	31	28	86	1.8	63	M	23	44	2001.9	1625.4	130.4	202.1	14	122	34	11	64.9	7	5.1	1957.9	90.3	-41	-24.5	7.7	-3	110.1
BT1516SWRLCP02SMPU	2015	21	Hochfilzen	12798	31	28	86	1.8	63	M	24	102	2002.1	1616.6	65.9	217.6	40	122.2	92	2.2	0.4	30	-2.4	1900.1	32.5	17	-33.3	0.2	20	45.6
BT1516SWRLCP02SMPU	2015	21	Hochfilzen	12798	31	28	86	1.8	63	M	25	106	2020.3	1662.5	43.6	208.2	43	140.4	96	48.1	-21.9	18	0.2	1914.3	46.7	21	12.6	2.8	8	23.3
BT1516SWRLCP02SMPU	2015	21	Hochfilzen	12798	31	28	86	1.8	63	M	27	87	2038.4	1665.4	84.3	201.7	30	158.5	77	51	18.8	17	-5.3	1951.4	83.8	2	15.5	-2.7	7	64
BT1516SWRLCP02SMPU	2015	21	Hochfilzen	12798	31	28	86	1.8	63	M	28	77	2041	1642.3	105.6	216.1	27	161.1	67	27.9	40.1	29	-2.9	1964	96.4	-8	-7.6	-0.3	19	85.3
BT1516SWRLCP02SMPU	2015	21	Hochfilzen	12798	31	28	86	1.8	63	M	29	99	2041.5	1629.5	109.9	203.1	38	161.6	89	15.1	44.4	14	-0.9	1942.5	74.9	14	-20.4	1.7	4	89.6
BT1516SWRLCP03SMPU	2015	23	Pokljuka	12375	39	33	92	4.9	64	M	25	25	2000.3	1637.3	155.4	182.6	4	153.8	25	-12.7	128.8	1	11.7	1975.3	140.6	-12	16.8	13.5	-1	111.3
BT1516SWRLCP03SMPU	2015	23	Pokljuka	12375	39	33	92	4.9	64	M	28	77	2009.6	1678.2	91.6	162.8	27	94.6	77	28.2	65	38	-45.1	1932.6	97.9	40	57.7	-43.3	36	47.5
BT1516SWRLCP03SMPU	2015	23	Pokljuka	12375	39	33	92	4.9	64	M	13	33	1950.8	1632.6	109.6	175.6	8	104.3	33	-17.4	83	10	-4.3	1917.8	83.1	-4	12.1	-2.5	8	65.5
BT1516SWRLCP03SMPU	2015	23	Pokljuka	12375	39	33	92	4.9	64	M	21	83	1984.2	1644.1	63.2	193.9	31	105.6	83	-5.9	36.6	32	-8	1901.2	66.5	46	23.6	-6.2	30	19.1
BT1516SWRLCP03SMPU	2015	23	Pokljuka	12375	39	33	92	4.9	64	M	23	72	1991.3	1630.5	108.7	180.1	23	271.3	72	-19.5	82.1	-3	13.2	1919.3	84.6	35	10	15	-5	64.6
BT1516SWRLCP03SMPU	2015	23	Pokljuka	12375	39	33	92	4.9	64	M	1	0	1846.5	1650	26.6	169.9	1	0	0	0	0	0	0	1846.5	11.8	-37	29.5	1.8	-2	-17.5
BT1516SWRLCP03SMPU	2015	23	Pokljuka	12375	39	33	92	4.9	64	M	2	26	1863.1	1633.6	47.9	155.6	5	16.6	26	-16.4	21.3	-11	-3.3	1837.1	2.4	-11	13.1	-1.5	-13	3.8
BT1516SWRLCP03SMPU	2015	23	Pokljuka	12375	39	33	92	4.9	64	M	3	28	1869.9	1617.6	65	159.3	6	23.4	28	-32.4	38.4	-5	-5.6	1841.9	7.2	-9	-2.9	-3.8	-7	20.9
BT1516SWRLCP03SMPU	2015	23	Pokljuka	12375	39	33	92	4.9	64	M	4	37	1871.7	1620.5	44.1	170.1	9	25.2	37	-29.5	17.5	2	-1.8	1834.7	0	0	0	0	0	0
BT1516SWRLCP03SMPU	2015	23	Pokljuka	12375	39	33	92	4.9	64	M	5	32	1895.7	1649.4	45.6	168.7	7	49.2	32	-0.6	19	-2	0.8	1863.7	29	-5	28.9	2.6	-4	1.5
BT1516SWRLCP03SMPU	2015	23	Pokljuka	12375	39	33	92	4.9	64	M	6	25	1902	1647.1	65.4	164.5	3	55.5	25	-2.9	38.8	-5	-0.4	1877	42.3	-12	26.6	1.4	-7	21.3
BT1516SWRLCP03SMPU	2015	23	Pokljuka	12375	39	33	92	4.9	64	M	7	41	1902.1	1627.4	67	166.7	11	55.6	41	-22.6	40.4	-7	3.8	1861.1	26.4	4	6.9	5.6	-9	22.9
BT1516SWRLCP03SMPU	2015	23	Pokljuka	12375	39	33	92	4.9	64	M	8	15	1916.7	1668.2	68.2	165.3	2	70.2	15	18.2	41.6	-5	0.4	1901.7	67	-22	47.7	2.2	-7	24.1
BT1516SWRLCP03SMPU	2015	23	Pokljuka	12375	39	33	92	4.9	64	M	9	55	1928.4	1657.2	42.1	174.1	14	81.9	55	7.2	15.5	-3	7.2	1873.4	38.7	18	36.7	9	-5	-2
BT1516SWRLCP03SMPU	2015	23	Pokljuka	12375	39	33	92	4.9	64	M	10	87	1938	1659.5	21.9	169.6	33	108.1	87	9.5	-4.7	-4	3.7	1851	16.3	50	39	5.5	-6	-22.2
BT1516SWRLCP03SMPU	2015	23	Pokljuka	12375	39	33	92	4.9	64	M	11	77	1941.1	1653.9	42.1	168.1	26	193.2	77	3.9	15.5	-6	4.2	1864.1	29.4	40	33.4	6	-8	-2
BT1516SWRLCP03SMPU	2015	23	Pokljuka	12375	39	33	92	4.9	64	M	12	68	1941.8	1650	44.1	179.7	21	216.8	68	0	17.5	3	6.8	1873.8	39.1	31	29.5	8.6	1	0
BT1516SWRLCP03SMPU	2015	23	Pokljuka	12375	39	33	92	4.9	64	M	14	82	1952.1	1658.4	21	190.7	30	369.9	82	8.4	-5.6	23	-2.2	1870.1	35.4	45	37.9	-0.4	21	-23.1
BT1516SWRLCP03SMPU	2015	23	Pokljuka	12375	39	33	92	4.9	64	M	15	84	1954.6	1651.1	43.7	175.8	32	137.7	84	1.1	17.1	1	4.9	1870.6	35.9	47	30.6	6.7	-1	-0.4
BT1516SWRLCP03SMPU	2015	23	Pokljuka	12375	39	33	92	4.9	64	M	16	40	1955	1700.8	46	168.2	10	108.5	40	50.8	19.4	-17	15.3	1915	80.3	3	80.3	17.1	-19	1.9
BT1516SWRLCP03SMPU	2015	23	Pokljuka	12375	39	33	92	4.9	64	M	17	44	1958.7	1684.1	44.7	185.9	12	112.2	44	34.1	18.1	9	7	1914.7	80	7	63.6	8.8	7	0.6
BT1516SWRLCP03SMPU	2015	23	Pokljuka	12375	39	33	92	4.9	64	M	18	61	1972.4	1657.8	82.1	171.5	16	166	61	7.8	55.5	4	-2.4	1911.4	76.7	24	37.3	-0.6	2	38
BT1516SWRLCP03SMPU	2015	23	Pokljuka	12375	39	33	92	4.9	64	M	19	101	1977.5	1647.6	44.9	184	43	159.2	101	-2.4	18.3	8	6.1	1876.5	41.8	64	27.1	7.9	6	0.8
BT1516SWRLCP03SMPU	2015	23	Pokljuka	12375	39	33	92	4.9	64	M	20	66	1982.8	1675.5	68.1	173.2	18	183	66	25.5	41.5	-2	5.3	1916.8	82.1	29	55	7.1	-4	24
BT1516SWRLCP03SMPU	2015	23	Pokljuka	12375	39	33	92	4.9	64	M	22	79	1989.7	1662	63.9	184.8	28	163.1	79	12	37.3	12	2.9	1910.7	76	42	41.5	4.7	10	19.8
BT1516SWRLCP03SMPU	2015	23	Pokljuka	12375	39	33	92	4.9	64	M	24	46	2000.1	1700.1	66.3	187.7	13	153.6	46	50.1	39.7	9	8.8	1954.1	119.4	9	79.6	10.6	7	22.2
BT1516SWRLCP03SMPU	2015	23	Pokljuka	12375	39	33	92	4.9	64	M	26	66	2000.3	1673	86.6	174.7	19	136.3	66	23	60	0	4.8	1934.3	99.6	29	52.5	6.6	-2	42.5
BT1516SWRLCP03SMPU	2015	23	Pokljuka	12375	39	33	92	4.9	64	M	27	99	2005.7	1682.2	44.4	180.1	42	254.4	99	32.2	17.8	4	6.2	1906.7	72	62	61.7	8	2	0.3
BT1516SWRLCP03SMPU	2015	23	Pokljuka	12375	39	33	92	4.9	64	M	30	107	2019.8	1658.8	66.5	187.5	46	272.3	107	8.8	39.9	14	3.6	1912.8	78.1	70	38.3	5.4	12	22.4
BT1516SWRLCP04SMPU	2015	26	Ruhpolding	12850	26	18	82	4.8	82	M	19	88	2090.2	1782.3	37.7	182.2	31	73.9	60	13.5	2	48	-32.4	2002.2	50.3	-11	54.2	-28.8	24	0.9
BT1516SWRLCP04SMPU	2015	26	Ruhpolding	12850	26	18	82	4.8	82	M	1	28	1999.1	1768.8	35.7	166.6	6	66.9	0	0	0	0	0	1971.1	19.2	-71	40.7	3.6	-24	-1.1
BT1516SWRLCP04SMPU	2015	26	Ruhpolding	12850	26	18	82	4.8	82	M	13	85	2064.9	1750.6	36.6	192.7	29	111	57	-18.2	0.9	37	-10.9	1979.9	28	-14	22.5	-7.3	13	-0.2
BT1516SWRLCP04SMPU	2015	26	Ruhpolding	12850	26	18	82	4.8	82	M	17	86	2073	1766	36.5	184.5	30	65.8	58	-2.8	0.8	30	-12.1	1987	35.1	-13	37.9	-8.5	6	-0.3
BT1516SWRLCP04SMPU	2015	26	Ruhpolding	12850	26	18	82	4.8	82	M	18	61	2081.4	1698.6	123.2	198.6	16	45	33	-70.2	87.5	40	-8	2020.4	68.5	-38	-29.5	-4.4	16	86.4
BT1516SWRLCP04SMPU	2015	26	Ruhpolding	12850	26	18	82	4.8	82	M	2	11	2003.3	1752	62.7	177.6	4	26.2	-17	-16.8	27	21	-10	1992.3	40.4	-88	23.9	-6.4	-3	25.9
BT1516SWRLCP04SMPU	2015	26	Ruhpolding	12850	26	18	82	4.8	82	M	3	45	2004.2	1745.7	14.2	199.3	8	59.1	17	-23.1	-21.5	36	-3.3	1959.2	7.3	-54	17.6	0.3	12	-22.6
BT1516SWRLCP04SMPU	2015	26	Ruhpolding	12850	26	18	82	4.8	82	M	4	3	2007.1	1733.1	83.1	187.9	2	45.1	-25	-35.7	47.4	27	-5.7	2004.1	52.2	-96	5	-2.1	3	46.3
BT1516SWRLCP04SMPU	2015	26	Ruhpolding	12850	26	18	82	4.8	82	M	5	8	2025.3	1773.4	60.1	183.8	3	8	-20	4.6	24.4	20	-2.8	2017.3	65.4	-91	45.3	0.8	-4	23.3
BT1516SWRLCP04SMPU	2015	26	Ruhpolding	12850	26	18	82	4.8	82	M	6	60	2044.1	1761.6	34.2	188.3	15	59.5	32	-7.2	-1.5	25	-3.3	1984.1	32.2	-39	33.5	0.3	1	-2.6
BT1516SWRLCP03SWPU	2015	26	Ruhpolding	12850	26	18	82	4.8	82	M	7	0	2044.2	1756.6	108.8	178.8	1	448.3	-28	-12.2	73.1	18	-5.8	2044.2	92.3	-99	28.5	-2.2	-6	72
BT1516SWRLCP04SMPU	2015	26	Ruhpolding	12850	26	18	82	4.8	82	M	8	59	2049.1	1751.3	60.3	178.5	13	104.2	31	-17.5	24.6	15	-3.1	1990.1	38.2	-40	23.2	0.5	-9	23.5
BT1516SWRLCP04SMPU	2015	26	Ruhpolding	12850	26	18	82	4.8	82	M	9	99	2050.9	1728.1	36.8	187	40	225.5	71	-40.7	1.1	24	-3.6	1951.9	0	0	0	0	0	0
BT1516SWRLCP04SMPU	2015	26	Ruhpolding	12850	26	18	82	4.8	82	M	10	53	2051.8	1772.2	38.5	188.1	10	67.2	25	3.4	2.8	23	-1.5	1998.8	46.9	-46	44.1	2.1	-1	1.7
BT1516SWRLCP04SMPU	2015	26	Ruhpolding	12850	26	18	82	4.8	82	M	11	40	2058.2	1760.6	61.3	196.3	7	0	12	-8.2	25.6	30	-0.3	2018.2	66.3	-59	32.5	3.3	6	24.5
BT1516SWRLCP04SMPU	2015	26	Ruhpolding	12850	26	18	82	4.8	82	M	12	60	2058.6	1719.1	79.4	200.1	14	50	32	-49.7	43.7	37	-3.5	1998.6	46.7	-39	-9	0.1	13	42.6
BT1516SWRLCP04SMPU	2015	26	Ruhpolding	12850	26	18	82	4.8	82	M	14	24	2066	1769.5	78.8	193.7	5	4.2	-4	0.7	43.1	28	-0.9	2042	90.1	-75	41.4	2.7	4	42
BT1516SWRLCP04SMPU	2015	26	Ruhpolding	12850	26	18	82	4.8	82	M	15	45	2066.3	1768.2	61.3	191.8	9	5.1	17	-0.6	25.6	23	2.2	2021.3	69.4	-54	40.1	5.8	-1	24.5
BT1516SWRLCP04SMPU	2015	26	Ruhpolding	12850	26	18	82	4.8	82	M	16	70	2070.3	1781.8	13.8	204.7	23	199.6	42	13	-21.9	42	-3.9	2000.3	48.4	-29	53.7	-0.3	18	-23
BT1516SWRLCP04SMPU	2015	26	Ruhpolding	12850	26	18	82	4.8	82	M	20	83	2093.3	1766.3	59.4	184.6	26	167.4	55	-2.5	23.7	24	-6	2010.3	58.4	-16	38.2	-2.4	0	22.6
BT1516SWRLCP04SMPU	2015	26	Ruhpolding	12850	26	18	82	4.8	82	M	21	56	2103.3	1776.6	58.4	212.3	12	132.8	28	7.8	22.7	50	-4.3	2047.3	95.4	-43	48.5	-0.7	26	21.6
BT1516SWRLCP04SMPU	2015	26	Ruhpolding	12850	26	18	82	4.8	82	M	22	90	2104.4	1785.8	38.5	190.1	33	134.5	62	17	2.8	28	-4.5	2014.4	62.5	-9	57.7	-0.9	4	1.7
BT1516SWRLCP04SMPU	2015	26	Ruhpolding	12850	26	18	82	4.8	82	M	23	63	2105.4	1741.3	106.1	195	19	130.1	35	-27.5	70.4	31	-2.6	2042.4	90.5	-36	13.2	1	7	69.3
BT1516SWRLCP04SMPU	2015	26	Ruhpolding	12850	26	18	82	4.8	82	M	24	84	2110.1	1762.6	82.5	181	28	133.4	56	-6.2	46.8	20	-5.6	2026.1	74.2	-15	34.5	-2	-4	45.7
BT1516SWRLCP04SMPU	2015	26	Ruhpolding	12850	26	18	82	4.8	82	M	25	66	2122.9	1798.3	59.6	199	21	106.3	38	29.5	23.9	33	-0.6	2056.9	105	-33	70.2	3	9	22.8
BT1516SWRLCP04SMPU	2015	26	Ruhpolding	12850	26	18	82	4.8	82	M	26	61	2129.2	1759.8	125	183.4	18	130.3	33	-9	89.3	20	-3.2	2068.2	116.3	-38	31.7	0.4	-4	88.2
BT1516SWRLCP04SMPU	2015	26	Ruhpolding	12850	26	18	82	4.8	82	M	27	61	2129.4	1766.1	104.1	198.2	17	82.3	33	-2.7	68.4	34	-2.4	2068.4	116.5	-38	38	1.2	10	67.3
BT1516SWRLCP04SMPU	2015	26	Ruhpolding	12850	26	18	82	4.8	82	M	28	55	2131.9	1799.7	83.3	193.9	11	52.7	27	30.9	47.6	34	-6.7	2076.9	125	-44	71.6	-3.1	10	46.5
BT1516SWRLCP04SMPU	2015	26	Ruhpolding	12850	26	18	82	4.8	82	M	29	83	2132.5	1813.1	38	198.4	27	94.2	55	44.3	2.3	34	-2.2	2049.5	97.6	-16	85	1.4	10	1.2
BT1516SWRLCP04SMPU	2015	26	Ruhpolding	12850	26	18	82	4.8	82	M	30	90	2133.6	1787.3	62.2	194.1	32	91.1	62	18.5	26.5	31	-3.5	2043.6	91.7	-9	59.2	0.1	7	25.4
BT1516SWRLCP06SMPU	2015	28	Anterselva	12850	26	11	71	0.3	51	M	1	14	1911.9	1650.5	72.1	175.3	5	51.8	0	0	0	0	0	1897.9	38.5	-56	13.9	0.8	-16	39.8
BT1516SWRLCP04SWPU	2015	28	Anterselva	12850	26	11	71	0.3	51	M	2	0	1922.2	1674.7	57.1	190.4	1	365.6	-14	24.2	-15	15	0.1	1922.2	62.8	-70	38.1	0.9	-1	24.8
BT1516SWRLCP06SMPU	2015	28	Anterselva	12850	26	11	71	0.3	51	M	3	21	1926	1634.4	94	176.6	8	94.7	7	-16.1	21.9	6	-4.7	1905	45.6	-49	-2.2	-3.9	-10	61.7
BT1516SWRLCP06SMPU	2015	28	Anterselva	12850	26	11	71	0.3	51	M	4	70	1929.4	1636.6	32.3	190.5	28	67	56	-13.9	-39.8	16	-0.8	1859.4	0	0	0	0	0	0
BT1516SWRLCP06SMPU	2015	28	Anterselva	12850	26	11	71	0.3	51	M	5	24	1946.6	1671.1	54.9	196.6	9	14.1	10	20.6	-17.2	16	5.3	1922.6	63.2	-46	34.5	6.1	0	22.6
BT1516SWRLCP06SMPU	2015	28	Anterselva	12850	26	11	71	0.3	51	M	6	16	1947.7	1688.2	79.3	164.2	6	0	2	37.7	7.2	-13	1.9	1931.7	72.3	-54	51.6	2.7	-29	47
BT1516SWRLCP06SMPU	2015	28	Anterselva	12850	26	11	71	0.3	51	M	7	75	1950.8	1645.3	58.5	172	31	174.3	61	-5.2	-13.6	-2	-1.3	1875.8	16.4	5	8.7	-0.5	-18	26.2
BT1516SWRLCP06SMPU	2015	28	Anterselva	12850	26	11	71	0.3	51	M	8	11	1963.7	1681.4	76.3	195	3	60	-3	30.9	4.2	21	-1.3	1952.7	93.3	-59	44.8	-0.5	5	44
BT1516SWRLCP06SMPU	2015	28	Anterselva	12850	26	11	71	0.3	51	M	9	38	1964.7	1655.6	74.1	197	13	149.4	24	5.1	2	16	5.7	1926.7	67.3	-32	19	6.5	0	41.8
BT1516SWRLCP06SMPU	2015	28	Anterselva	12850	26	11	71	0.3	51	M	10	51	1967.7	1632.9	92.8	191	18	121.7	37	-17.6	20.7	15	0.7	1916.7	57.3	-19	-3.7	1.5	-1	60.5
BT1516SWRLCP06SMPU	2015	28	Anterselva	12850	26	11	71	0.3	51	M	11	6	1971.9	1657.8	120.6	187.5	2	10.3	-8	7.3	48.5	11	1.2	1965.9	106.5	-64	21.2	2	-5	88.3
BT1516SWRLCP06SMPU	2015	28	Anterselva	12850	26	11	71	0.3	51	M	12	70	1978.9	1656	55.1	197.8	27	175.1	56	5.5	-17	18	4.5	1908.9	49.5	0	19.4	5.3	2	22.8
BT1516SWRLCP06SMPU	2015	28	Anterselva	12850	26	11	71	0.3	51	M	13	57	1984.6	1676	52	199.6	21	103.6	43	25.5	-20.1	23	1.3	1927.6	68.2	-13	39.4	2.1	7	19.7
BT1516SWRLCP06SMPU	2015	28	Anterselva	12850	26	11	71	0.3	51	M	14	87	1987.9	1675.5	33.7	191.7	41	159.9	73	25	-38.4	7	9.4	1900.9	41.5	17	38.9	10.2	-9	1.4
BT1516SWRLCP06SMPU	2015	28	Anterselva	12850	26	11	71	0.3	51	M	15	43	1991.1	1667.9	93.2	187	15	114.4	29	17.4	21.1	5	6.7	1948.1	88.7	-27	31.3	7.5	-11	60.9
BT1516SWRLCP06SMPU	2015	28	Anterselva	12850	26	11	71	0.3	51	M	16	76	1992.7	1641.2	73.7	201.8	34	156.4	62	-9.3	1.6	23	3.5	1916.7	57.3	6	4.6	4.3	7	41.4
BT1516SWRLCP06SMPU	2015	28	Anterselva	12850	26	11	71	0.3	51	M	17	18	2006.6	1697.4	96	195.2	7	35.8	4	46.9	23.9	20	-0.1	1988.6	129.2	-52	60.8	0.7	4	63.7
BT1516SWRLCP06SMPU	2015	28	Anterselva	12850	26	11	71	0.3	51	M	18	76	2013.2	1661.6	95.6	180	35	80.8	62	11.1	23.5	0	4.7	1937.2	77.8	6	25	5.5	-16	63.3
BT1516SWRLCP06SMPU	2015	28	Anterselva	12850	26	11	71	0.3	51	M	19	53	2015.5	1680	92.5	190	20	130.4	39	29.5	20.4	12	2.7	1962.5	103.1	-17	43.4	3.5	-4	60.2
BT1516SWRLCP06SMPU	2015	28	Anterselva	12850	26	11	71	0.3	51	M	20	39	2026.3	1656	119.3	212	14	52.8	25	5.5	47.2	34	2.7	1987.3	127.9	-31	19.4	3.5	18	87
BT1516SWRLCP06SMPU	2015	28	Anterselva	12850	26	11	71	0.3	51	M	21	76	2031.7	1644.4	109.1	202.2	36	101.3	62	-6.1	37	23	3.9	1955.7	96.3	6	7.8	4.7	7	76.8
BT1516SWRLCP06SMPU	2015	28	Anterselva	12850	26	11	71	0.3	51	M	22	50	2033.6	1681.2	112.8	189.6	17	200.8	36	30.7	40.7	11	3.3	1983.6	124.2	-20	44.6	4.1	-5	80.5
BT1516SWRLCP06SMPU	2015	28	Anterselva	12850	26	11	71	0.3	51	M	23	34	2037.5	1655.9	138.5	209.1	11	34.7	20	5.4	66.4	29	4.8	2003.5	144.1	-36	19.3	5.6	13	106.2
BT1516SWRLCP06SMPU	2015	28	Anterselva	12850	26	11	71	0.3	51	M	24	68	2038.7	1686.1	83.2	201.4	25	131.1	54	35.6	11.1	19	7.1	1970.7	111.3	-2	49.5	7.9	3	50.9
BT1516SWRLCP06SMPU	2015	28	Anterselva	12850	26	11	71	0.3	51	M	25	81	2039.7	1678.9	92.7	187.1	38	138.8	67	28.4	20.6	9	2.8	1958.7	99.3	11	42.3	3.6	-7	60.4
BT1516SWRLCP06SMPU	2015	28	Anterselva	12850	26	11	71	0.3	51	M	26	61	2039.9	1658.8	134.9	185.2	22	72.7	47	8.3	62.8	5	4.9	1978.9	119.5	-9	22.2	5.7	-11	102.6
BT1516SWRLCP06SMPU	2015	28	Anterselva	12850	26	11	71	0.3	51	M	27	52	2042.3	1674	126.9	189.4	19	55.8	38	23.5	54.8	16	-1.9	1990.3	130.9	-18	37.4	-1.1	0	94.6
BT1516SWRLCP06SMPU	2015	28	Anterselva	12850	26	11	71	0.3	51	M	28	75	2042.9	1680.5	98.9	188.5	32	38.9	61	30	26.8	10	3.2	1967.9	108.5	5	43.9	4	-6	66.6
BT1516SWRLCP06SMPU	2015	28	Anterselva	12850	26	11	71	0.3	51	M	29	64	2043	1691.7	97.8	189.5	24	135	50	41.2	25.7	10	4.2	1979	119.6	-6	55.1	5	-6	65.5
BT1516SWRLCP06SMPU	2015	28	Anterselva	12850	26	11	71	0.3	51	M	30	62	2046.9	1670.9	135.6	178.4	23	128	48	20.4	63.5	3	0.1	1984.9	125.5	-8	34.3	0.9	-13	103.3
BT1516SWRLCP08SMPU	2015	30	Presque	12545	24	19	80	-15.1	47	M	9	85	1998.4	1608.7	91.5	213.2	16	163.2	56	36.2	20.2	8	13.6	1913.4	78	56	36.2	13.6	8	20.2
BT1516SWRLCP08SMPU	2015	30	Presque	12545	24	19	80	-15.1	47	M	12	72	2026.8	1598.3	138.3	218.2	12	99.7	43	25.8	67	13	13.6	1954.8	119.4	43	25.8	13.6	13	67
BT1516SWRLCP08SMPU	2015	30	Presque	12545	24	19	80	-15.1	47	M	19	59	2046	1592.5	138.2	256.3	8	201.7	30	20	66.9	49	15.7	1987	151.6	30	20	15.7	49	66.9
BT1516SWRLCP08SMPU	2015	30	Presque	12545	24	19	80	-15.1	47	M	27	50	2098.5	1608.1	214.8	225.6	5	162.8	21	35.6	143.5	32	2	2048.5	213.1	21	35.6	2	32	143.5
BT1516SWRLCP08SMPU	2015	30	Presque	12545	24	19	80	-15.1	47	M	1	29	1864.4	1572.5	71.3	191.6	3	71.5	0	0	0	0	0	1835.4	0	0	0	0	0	0
BT1516SWRLCP06SWPU	2015	30	Presque	12545	24	19	80	-15.1	47	M	2	0	1889.2	1591	95.3	202.9	1	262.6	-29	18.5	24	8	3.3	1889.2	53.8	-29	18.5	3.3	8	24
BT1516SWRLCP08SMPU	2015	30	Presque	12545	24	19	80	-15.1	47	M	3	28	1935.9	1615	71.7	221.2	2	24.8	-1	42.5	0.4	26	3.6	1907.9	72.5	-1	42.5	3.6	26	0.4
BT1516SWRLCP08SMPU	2015	30	Presque	12545	24	19	80	-15.1	47	M	4	69	1964.1	1619	93	183.1	11	117.6	40	46.5	21.7	-10	1.5	1895.1	59.7	40	46.5	1.5	-10	21.7
BT1516SWRLCP08SMPU	2015	30	Presque	12545	24	19	80	-15.1	47	M	5	67	1982	1614.9	72.1	228	10	181.6	38	42.4	0.8	32	4.4	1915	79.6	38	42.4	4.4	32	0.8
BT1516SWRLCP08SMPU	2015	30	Presque	12545	24	19	80	-15.1	47	M	6	80	1987.1	1595.4	91	220.7	14	185.3	51	22.9	19.7	24	5.1	1907.1	71.7	51	22.9	5.1	24	19.7
BT1516SWRLCP08SMPU	2015	30	Presque	12545	24	19	80	-15.1	47	M	7	93	1989.3	1586.1	90.9	219.3	20	157	64	13.6	19.6	26	1.7	1896.3	60.9	64	13.6	1.7	26	19.6
BT1516SWRLCP08SMPU	2015	30	Presque	12545	24	19	80	-15.1	47	M	8	95	1993.1	1577.6	112.2	208.3	21	124.9	66	5.1	40.9	11	5.7	1898.1	62.7	66	5.1	5.7	11	40.9
BT1516SWRLCP08SMPU	2015	30	Presque	12545	24	19	80	-15.1	47	M	10	111	2012.5	1627	72.6	201.9	28	207.4	82	54.5	1.3	6	4.3	1901.5	66.1	82	54.5	4.3	6	1.3
BT1516SWRLCP08SMPU	2015	30	Presque	12545	24	19	80	-15.1	47	M	11	91	2021.4	1639.5	92.2	198.7	19	180.3	62	67	20.9	3	4.1	1930.4	95	62	67	4.1	3	20.9
BT1516SWRLCP08SMPU	2015	30	Presque	12545	24	19	80	-15.1	47	M	13	46	2027.2	1613	144	224.2	4	0	17	40.5	72.7	26	6.6	1981.2	145.8	17	40.5	6.6	26	72.7
BT1516SWRLCP08SMPU	2015	30	Presque	12545	24	19	80	-15.1	47	M	14	82	2027.6	1590.7	136.6	218.3	15	122.7	53	18.2	65.3	23	3.7	1945.6	110.2	53	18.2	3.7	23	65.3
BT1516SWRLCP08SMPU	2015	30	Presque	12545	24	19	80	-15.1	47	M	15	100	2029.2	1613.5	114.5	201.2	23	302.7	71	41	43.2	3	6.6	1929.2	93.8	71	41	6.6	3	43.2
BT1516SWRLCP08SMPU	2015	30	Presque	12545	24	19	80	-15.1	47	M	16	118	2042.3	1624.8	95.4	204.1	31	355	89	52.3	24.1	8	4.5	1924.3	88.9	89	52.3	4.5	8	24.1
BT1516SWRLCP08SMPU	2015	30	Presque	12545	24	19	80	-15.1	47	M	17	53	2043.8	1584.3	186.6	219.9	6	234.1	24	11.8	115.3	22	6.3	1990.8	155.4	24	11.8	6.3	22	115.3
BT1516SWRLCP08SMPU	2015	30	Presque	12545	24	19	80	-15.1	47	M	18	91	2044.7	1638.2	96.5	219	18	243.9	62	65.7	25.2	25	2.4	1953.7	118.3	62	65.7	2.4	25	25.2
BT1516SWRLCP08SMPU	2015	30	Presque	12545	24	19	80	-15.1	47	M	20	76	2049.7	1616.9	158.9	197.9	13	162.4	47	44.4	87.6	-1	7.3	1973.7	138.3	47	44.4	7.3	-1	87.6
BT1516SWRLCP08SMPU	2015	30	Presque	12545	24	19	80	-15.1	47	M	21	54	2066.1	1591.2	179.2	241.7	7	179.4	25	18.7	107.9	43	7.1	2012.1	176.7	25	18.7	7.1	43	107.9
BT1516SWRLCP08SMPU	2015	30	Presque	12545	24	19	80	-15.1	47	M	22	111	2071.8	1567.9	180	212.9	27	283	82	-4.6	108.7	21	0.3	1960.8	125.4	82	-4.6	0.3	21	108.7
BT1516SWRLCP08SMPU	2015	30	Presque	12545	24	19	80	-15.1	47	M	23	130	2087.1	1636.1	96.8	224.2	39	292.1	101	63.6	25.5	28	4.6	1957.1	121.7	101	63.6	4.6	28	25.5
BT1516SWRLCP08SMPU	2015	30	Presque	12545	24	19	80	-15.1	47	M	24	102	2089.3	1653.5	119.9	213.9	24	164.8	73	81	48.6	28	-5.7	1987.3	151.9	73	81	-5.7	28	48.6
BT1516SWRLCP08SMPU	2015	30	Presque	12545	24	19	80	-15.1	47	M	25	124	2092.6	1636.6	123.2	208.8	35	353.2	95	64.1	51.9	7	10.2	1968.6	133.2	95	64.1	10.2	7	51.9
BT1516SWRLCP08SMPU	2015	30	Presque	12545	24	19	80	-15.1	47	M	26	121	2097.2	1648.5	120.9	206.8	32	177.9	92	76	49.6	10	5.2	1976.2	140.8	92	76	5.2	10	49.6
BT1516SWRLCP08SMPU	2015	30	Presque	12545	24	19	80	-15.1	47	M	28	113	2098.6	1638.6	117.8	229.2	29	148.1	84	66.1	46.5	28	9.6	1985.6	150.2	84	66.1	9.6	28	46.5
BT1516SWRLCP08SMPU	2015	30	Presque	12545	24	19	80	-15.1	47	M	29	126	2099.8	1614.5	137	222.3	36	228.2	97	42	65.7	23	7.7	1973.8	138.4	97	42	7.7	23	65.7
BT1516SWRLCP08SMPU	2015	30	Presque	12545	24	19	80	-15.1	47	M	30	126	2106.4	1650.5	123.9	206	37	235.4	97	78	52.6	2	12.4	1980.4	145	97	78	12.4	2	52.6
BT1516SWRLCP08SWPU	2015	32	Khanty	12540	49	23	80	-1.7	45	M	18	0	2109.7	1736.2	203.8	169.7	1	278.1	-1	12.6	111.8	-18.8	-2.7	2109.7	158.2	-75	-1.1	-0.6	-14.9	174.8
BT1516SWRLCP09SMPU	2015	32	Khanty	12540	49	23	80	-1.7	45	M	10	76	2053.1	1725.1	49.8	202.2	12	18.7	75	1.5	-42.2	15.2	-4.2	1977.1	25.6	1	-12.2	-2.1	19.1	20.8
BT1516SWRLCP09SMPU	2015	32	Khanty	12540	49	23	80	-1.7	45	M	28	85	2163.9	1806.9	78.3	193.7	18	124.2	84	83.3	-13.7	5.6	-3.1	2078.9	127.4	10	69.6	-1	9.5	49.3
BT1516SWRLCP09SMPU	2015	32	Khanty	12540	49	23	80	-1.7	45	M	29	117	2164.8	1744.6	118.8	184.4	32	126	116	21	26.8	-9.4	2.6	2047.8	96.3	42	7.3	4.7	-5.5	89.8
BT1516SWRLCP09SMPU	2015	32	Khanty	12540	49	23	80	-1.7	45	M	30	83	2168.8	1811.4	97.7	176.7	16	36.8	82	87.8	5.7	-8.2	-6.3	2085.8	134.3	8	74.1	-4.2	-4.3	68.7
BT1516SWRLCP09SMPU	2015	32	Khanty	12540	49	23	80	-1.7	45	M	1	1	2007.8	1723.6	92	191.2	2	101.9	0	0	0	0	0	2006.8	55.3	-74	-13.7	2.1	3.9	63
BT1516SWRLCP09SMPU	2015	32	Khanty	12540	49	23	80	-1.7	45	M	2	62	2016.3	1717.5	52.2	184.6	7	31.3	61	-6.1	-39.8	-2.8	-3.8	1954.3	2.8	-13	-19.8	-1.7	1.1	23.2
BT1516SWRLCP09SMPU	2015	32	Khanty	12540	49	23	80	-1.7	45	M	3	38	2023.5	1729.8	77	178.7	5	42.6	37	6.2	-15	-10.3	-2.2	1985.5	34	-37	-7.5	-0.1	-6.4	48
BT1516SWRLCP09SMPU	2015	32	Khanty	12540	49	23	80	-1.7	45	M	4	75	2026.5	1737.3	29	185.2	11	99.3	74	13.7	-63	-3.9	-2.1	1951.5	0	0	0	0	0	0
BT1516SWRLCP09SMPU	2015	32	Khanty	12540	49	23	80	-1.7	45	M	5	63	2035.1	1723	72.7	176.4	8	8.5	62	-0.6	-19.3	-9	-5.8	1972.1	20.6	-12	-14.3	-3.7	-5.1	43.7
BT1516SWRLCP09SMPU	2015	32	Khanty	12540	49	23	80	-1.7	45	M	6	53	2039.1	1726.8	69.7	189.6	6	15.7	52	3.2	-22.3	1.7	-3.3	1986.1	34.6	-22	-10.5	-1.2	5.6	40.7
BT1516SWRLCP09SMPU	2015	32	Khanty	12540	49	23	80	-1.7	45	M	7	81	2044.6	1738.6	28.9	196.1	15	86	80	15	-63.1	5.3	-0.4	1963.6	12.1	6	1.3	1.7	9.2	-0.1
BT1516SWRLCP09SMPU	2015	32	Khanty	12540	49	23	80	-1.7	45	M	8	28	2050.4	1730.6	98.6	193.2	4	43.5	27	7	6.6	6.6	-4.6	2022.4	70.9	-47	-6.7	-2.5	10.5	69.6
BT1516SWRLCP09SMPU	2015	32	Khanty	12540	49	23	80	-1.7	45	M	9	23	2051.3	1722.1	117.6	188.6	3	0	22	-1.5	25.6	0	-2.6	2028.3	76.8	-52	-15.2	-0.5	3.9	88.6
BT1516SWRLCP09SMPU	2015	32	Khanty	12540	49	23	80	-1.7	45	M	11	122	2081	1748.7	51.5	158.8	38	205.4	121	25.1	-40.5	-25.7	-6.7	1959	7.5	47	11.4	-4.6	-21.8	22.5
BT1516SWRLCP09SMPU	2015	32	Khanty	12540	49	23	80	-1.7	45	M	12	120	2088.4	1717.4	73.5	177.5	35	137.5	119	-6.2	-18.5	-9	-4.7	1968.4	16.9	45	-19.9	-2.6	-5.1	44.5
BT1516SWRLCP09SMPU	2015	32	Khanty	12540	49	23	80	-1.7	45	M	13	67	2089.6	1747	72.3	203.3	9	27.3	66	23.4	-19.7	15	-2.9	2022.6	71.1	-8	9.7	-0.8	18.9	43.3
BT1516SWRLCP09SMPU	2015	32	Khanty	12540	49	23	80	-1.7	45	M	14	113	2091	1719.8	77.3	180.9	29	147.9	112	-3.8	-14.7	-7.9	-2.4	1978	26.5	38	-17.5	-0.3	-4	48.3
BT1516SWRLCP09SMPU	2015	32	Khanty	12540	49	23	80	-1.7	45	M	15	81	2093.8	1761.4	72.7	178.7	14	106.6	80	37.8	-19.3	-16	3.5	2012.8	61.3	6	24.1	5.6	-12.1	43.7
BT1516SWRLCP09SMPU	2015	32	Khanty	12540	49	23	80	-1.7	45	M	16	75	2107.1	1736.7	111.9	183.5	10	81.8	74	13.1	19.9	-2.4	-5.3	2032.1	80.6	0	-0.6	-3.2	1.5	82.9
BT1516SWRLCP09SMPU	2015	32	Khanty	12540	49	23	80	-1.7	45	M	17	123	2108.4	1726.8	70.2	188.4	39	73.2	122	3.2	-21.8	2.6	-5.4	1985.4	33.9	48	-10.5	-3.3	6.5	41.2
BT1516SWRLCP09SMPU	2015	32	Khanty	12540	49	23	80	-1.7	45	M	19	78	2114.4	1764.5	78.6	193.3	13	45.3	77	40.9	-13.4	3	-0.9	2036.4	84.9	3	27.2	1.2	6.9	49.6
BT1516SWRLCP09SMPU	2015	32	Khanty	12540	49	23	80	-1.7	45	M	20	136	2128.7	1718.7	95	179	45	225.4	135	-4.9	3	-7.3	-4.9	1992.7	41.2	61	-18.6	-2.8	-3.4	66
BT1516SWRLCP09SMPU	2015	32	Khanty	12540	49	23	80	-1.7	45	M	21	84	2132	1738.5	112	197.5	17	161	83	14.9	20	13.1	-6.8	2048	96.5	9	1.2	-4.7	17	83
BT1516SWRLCP09SMPU	2015	32	Khanty	12540	49	23	80	-1.7	45	M	22	115	2133.8	1786.1	52.9	179.8	31	170.4	114	62.5	-39.1	-5	-6.4	2018.8	67.3	40	48.8	-4.3	-1.1	23.9
BT1516SWRLCP09SMPU	2015	32	Khanty	12540	49	23	80	-1.7	45	M	23	93	2141.1	1788.7	76.5	182.9	19	156.1	92	65.1	-15.5	1	-9.3	2048.1	96.6	18	51.4	-7.2	4.9	47.5
BT1516SWRLCP09SMPU	2015	32	Khanty	12540	49	23	80	-1.7	45	M	24	119	2145.3	1757.2	98.2	170.9	34	259.3	118	33.6	6.2	-17.1	-3.2	2026.3	74.8	44	19.9	-1.1	-13.2	69.2
BT1516SWRLCP09SMPU	2015	32	Khanty	12540	49	23	80	-1.7	45	M	25	111	2148.8	1743.2	97.1	197.5	25	163.2	110	19.6	5.1	13	-6.7	2037.8	86.3	36	5.9	-4.6	16.9	68.1
BT1516SWRLCP09SMPU	2015	32	Khanty	12540	49	23	80	-1.7	45	M	26	111	2155.7	1752.6	96.1	196	27	199.7	110	29	4.1	3.5	1.3	2044.7	93.2	36	15.3	3.4	7.4	67.1
BT1516SWRLCP09SMPU	2015	32	Khanty	12540	49	23	80	-1.7	45	M	27	110	2157.4	1713.9	121.2	212.3	23	260.9	109	-9.7	29.2	23.4	-2.3	2047.4	95.9	35	-23.4	-0.2	27.3	92.2
BT1516SWRLCH__SMPU	2015	34	Holmenkollen	12463	50	45	87	0	74	M	6	60	2019.4	1715	35.6	208.8	12	106.7	60	15.6	-72.2	28.7	10.8	1959.4	48	-47	12.5	4.2	30.8	0.5
BT1516SWRLCP09SWPU	2015	34	Holmenkollen	12463	50	45	87	0	74	M	1	0	1976.5	1699.4	107.8	169.3	1	410.2	0	0	0	0	0	1976.5	65.1	-107	-3.1	-6.6	2.1	72.7
BT1516SWRLCH__SMPU	2015	34	Holmenkollen	12463	50	45	87	0	74	M	2	27	1996.6	1727	82.4	160.2	2	0	27	27.6	-25.4	-12.7	3.6	1969.6	58.2	-80	24.5	-3	-10.6	47.3
BT1516SWRLCH__SMPU	2015	34	Holmenkollen	12463	50	45	87	0	74	M	3	76	2007.7	1699.7	59.9	172.1	17	59.9	76	0.3	-47.9	-10.4	13.2	1931.7	20.3	-31	-2.8	6.6	-8.3	24.8
BT1516SWRLCH__SMPU	2015	34	Holmenkollen	12463	50	45	87	0	74	M	4	36	2014.8	1706.3	106.6	165.9	4	50	36	6.9	-1.2	-7.4	4	1978.8	67.4	-71	3.8	-2.6	-5.3	71.5
BT1516SWRLCH__SMPU	2015	34	Holmenkollen	12463	50	45	87	0	74	M	5	107	2018.4	1702.5	35.1	173.8	39	368.8	107	3.1	-72.7	-2.1	6.6	1911.4	0	0	0	0	0	0
BT1516SWRLCH__SMPU	2015	34	Holmenkollen	12463	50	45	87	0	74	M	7	79	2019.8	1696.6	82.5	161.7	19	310.8	79	-2.8	-25.3	-15.2	7.6	1940.8	29.4	-28	-5.9	1	-13.1	47.4
BT1516SWRLCH__SMPU	2015	34	Holmenkollen	12463	50	45	87	0	74	M	8	28	2026.5	1724.8	107.4	166.3	3	20.1	28	25.4	-0.4	-8.9	5.9	1998.5	87.1	-79	22.3	-0.7	-6.8	72.3
BT1516SWRLCH__SMPU	2015	34	Holmenkollen	12463	50	45	87	0	74	M	9	118	2036.4	1690.3	55.7	172.4	45	232.1	118	-9.1	-52.1	-6.9	10	1918.4	7	11	-12.2	3.4	-4.8	20.6
BT1516SWRLCH__SMPU	2015	34	Holmenkollen	12463	50	45	87	0	74	M	10	73	2036.4	1702.1	81.7	179.6	16	66.2	73	2.7	-26.1	-0.8	11.1	1963.4	52	-34	-0.4	4.5	1.3	46.6
BT1516SWRLCH__SMPU	2015	34	Holmenkollen	12463	50	45	87	0	74	M	11	40	2038.1	1703.1	125	170	6	132.2	40	3.7	17.2	-3.6	4.3	1998.1	86.7	-67	0.6	-2.3	-1.5	89.9
BT1516SWRLCH__SMPU	2015	34	Holmenkollen	12463	50	45	87	0	74	M	12	70	2042.7	1724.9	57.2	190.6	15	87.3	70	25.5	-50.6	9.7	11.6	1972.7	61.3	-37	22.4	5	11.8	22.1
BT1516SWRLCH__SMPU	2015	34	Holmenkollen	12463	50	45	87	0	74	M	13	42	2053.5	1722.1	107.2	182.2	7	61.6	42	22.7	-0.6	7	5.9	2011.5	100.1	-65	19.6	-0.7	9.1	72.1
BT1516SWRLCH__SMPU	2015	34	Holmenkollen	12463	50	45	87	0	74	M	14	46	2058.4	1704.1	127.7	180.6	9	93.6	46	4.7	19.9	1.9	9.4	2012.4	101	-61	1.6	2.8	4	92.6
BT1516SWRLCH__SMPU	2015	34	Holmenkollen	12463	50	45	87	0	74	M	15	119	2059.7	1696.3	80.2	164.2	46	59.9	119	-3.1	-27.6	-18.7	13.6	1940.7	29.3	12	-6.2	7	-16.6	45.1
BT1516SWRLCH__SMPU	2015	34	Holmenkollen	12463	50	45	87	0	74	M	16	94	2063.3	1711.2	101.8	156.3	27	273.1	94	11.8	-6	-24.8	11.8	1969.3	57.9	-13	8.7	5.2	-22.7	66.7
BT1516SWRLCH__SMPU	2015	34	Holmenkollen	12463	50	45	87	0	74	M	17	69	2063.8	1710.9	101.1	182.8	14	119.9	69	11.5	-6.7	3.3	10.2	1994.8	83.4	-38	8.4	3.6	5.4	66
BT1516SWRLCH__SMPU	2015	34	Holmenkollen	12463	50	45	87	0	74	M	18	44	2070.1	1719.9	125.7	180.5	8	77	44	20.5	17.9	4.7	6.5	2026.1	114.7	-63	17.4	-0.1	6.8	90.6
BT1516SWRLCH__SMPU	2015	34	Holmenkollen	12463	50	45	87	0	74	M	19	108	2074.5	1728.7	62.9	174.9	40	41.9	108	29.3	-44.9	-1.1	6.7	1966.5	55.1	1	26.2	0.1	1	27.8
BT1516SWRLCH__SMPU	2015	34	Holmenkollen	12463	50	45	87	0	74	M	20	57	2083.2	1735.6	109.9	180.7	11	120.2	57	36.2	2.1	3.9	7.5	2026.2	114.8	-50	33.1	0.9	6	74.8
BT1516SWRLCH__SMPU	2015	34	Holmenkollen	12463	50	45	87	0	74	M	21	84	2092.6	1728.7	110.4	169.5	23	152.7	84	29.3	2.6	-7.4	7.6	2008.6	97.2	-23	26.2	1	-5.3	75.3
BT1516SWRLCH__SMPU	2015	34	Holmenkollen	12463	50	45	87	0	74	M	22	85	2096	1742.6	82	186.4	24	116.1	85	43.2	-25.8	11	6.1	2011	99.6	-22	40.1	-0.5	13.1	46.9
BT1516SWRLCH__SMPU	2015	34	Holmenkollen	12463	50	45	87	0	74	M	23	68	2096.4	1711.3	129	188.1	13	42.9	68	11.9	21.2	12.2	6.6	2028.4	117	-39	8.8	0	14.3	93.9
BT1516SWRLCH__SMPU	2015	34	Holmenkollen	12463	50	45	87	0	74	M	24	52	2096.7	1710.9	150.8	183	10	81.9	52	11.5	43	2.9	10.8	2044.7	133.3	-55	8.4	4.2	5	115.7
BT1516SWRLCH__SMPU	2015	34	Holmenkollen	12463	50	45	87	0	74	M	25	95	2102.8	1732.2	84.7	190.9	28	86.8	95	32.8	-23.1	14.2	7.4	2007.8	96.4	-12	29.7	0.8	16.3	49.6
BT1516SWRLCH__SMPU	2015	34	Holmenkollen	12463	50	45	87	0	74	M	26	105	2104.2	1657	171	171.2	36	152.9	105	-42.4	63.2	-0.9	2.8	1999.2	87.8	-2	-45.5	-3.8	1.2	135.9
BT1516SWRLCH__SMPU	2015	34	Holmenkollen	12463	50	45	87	0	74	M	27	80	2105.9	1701.1	146.6	178.2	20	43.3	80	1.7	38.8	-0.8	9.7	2025.9	114.5	-27	-1.4	3.1	1.3	111.5
BT1516SWRLCH__SMPU	2015	34	Holmenkollen	12463	50	45	87	0	74	M	28	40	2108.7	1718.7	164.4	185.6	5	38.3	40	19.3	56.6	14.9	1.4	2068.7	157.3	-67	16.2	-5.2	17	129.3
BT1516SWRLCH__SMPU	2015	34	Holmenkollen	12463	50	45	87	0	74	M	29	101	2109.5	1709.5	107.4	191.6	34	196.5	101	10.1	-0.4	12.6	9.7	2008.5	97.1	-6	7	3.1	14.7	72.3
BT1516SWRLCH__SMPU	2015	34	Holmenkollen	12463	50	45	87	0	74	M	30	89	2121.2	1747.9	105.7	178.6	25	119.5	89	48.5	-2.1	-0.7	10	2032.2	120.8	-18	45.4	3.4	1.4	70.6
BT1415SWRLCP01SMPU	2014	36	Oestersund	13085	29	14	78	-12	71	M	12	95	2109.9	1748.1	74.4	192.4	26	360.9	95	25.5	-47.2	18.8	-17.1	2014.9	58.2	-10	36.1	-12.9	10.4	24.6
BT1516SWRLCH__SWPU	2014	36	Oestersund	13085	29	14	78	-12	71	M	1	0	2034.9	1722.6	121.6	190.7	1	370.6	0	0	0	0	0	2034.9	78.2	-105	10.6	4.2	-8.4	71.8
BT1415SWRLCP01SMPU	2014	36	Oestersund	13085	29	14	78	-12	71	M	2	48	2044.9	1750	53.1	193.8	6	67.7	48	27.4	-68.5	4.9	-1.8	1996.9	40.2	-57	38	2.4	-3.5	3.3
BT1415SWRLCP01SMPU	2014	36	Oestersund	13085	29	14	78	-12	71	M	3	49	2061.2	1737	76.9	198.3	7	10	49	14.4	-44.7	9.9	-2.3	2012.2	55.5	-56	25	1.9	1.5	27.1
BT1415SWRLCP01SMPU	2014	36	Oestersund	13085	29	14	78	-12	71	M	4	29	2061.6	1749.9	99.5	183.2	3	115.1	29	27.3	-22.1	-9.5	2	2032.6	75.9	-76	37.9	6.2	-17.9	49.7
BT1415SWRLCP01SMPU	2014	36	Oestersund	13085	29	14	78	-12	71	M	5	105	2061.7	1712	49.8	194.9	30	199.1	105	-10.6	-71.8	8.4	-4.2	1956.7	0	0	0	0	0	0
BT1415SWRLCP01SMPU	2014	36	Oestersund	13085	29	14	78	-12	71	M	6	64	2063	1731	49.3	218.7	11	130.3	64	8.4	-72.3	21.5	6.5	1999	42.3	-41	19	10.7	13.1	-0.5
BT1415SWRLCP01SMPU	2014	36	Oestersund	13085	29	14	78	-12	71	M	7	88	2066.5	1733.5	48.1	196.9	22	232	88	10.9	-73.5	14.1	-7.9	1978.5	21.8	-17	21.5	-3.7	5.7	-1.7
BT1415SWRLCP01SMPU	2014	36	Oestersund	13085	29	14	78	-12	71	M	8	78	2077.9	1755.9	51.8	192.2	16	89.9	78	33.3	-69.8	-0.9	2.4	1999.9	43.2	-27	43.9	6.6	-9.3	2
BT1415SWRLCP01SMPU	2014	36	Oestersund	13085	29	14	78	-12	71	M	9	86	2091.9	1735	72.8	198.1	20	189.4	86	12.4	-48.8	4.1	3.3	2005.9	49.2	-19	23	7.5	-4.3	23
BT1415SWRLCP01SMPU	2014	36	Oestersund	13085	29	14	78	-12	71	M	10	57	2098.1	1744.1	97.6	199.4	8	26.3	57	21.5	-24	9.3	-0.6	2041.1	84.4	-48	32.1	3.6	0.9	47.8
BT1415SWRLCP01SMPU	2014	36	Oestersund	13085	29	14	78	-12	71	M	11	45	2102.6	1755	101.5	201.1	5	112.5	45	32.4	-20.1	18.2	-7.8	2057.6	100.9	-60	43	-3.6	9.8	51.7
BT1415SWRLCP01SMPU	2014	36	Oestersund	13085	29	14	78	-12	71	M	13	114	2121.5	1747.6	50.1	209.8	36	254	114	25	-71.5	20.2	-1.1	2007.5	50.8	9	35.6	3.1	11.8	0.3
BT1415SWRLCP01SMPU	2014	36	Oestersund	13085	29	14	78	-12	71	M	14	72	2124.8	1712.1	145.3	195.4	15	164.6	72	-10.5	23.7	8	-3.3	2052.8	96.1	-33	0.1	0.9	-0.4	95.5
BT1415SWRLCP01SMPU	2014	36	Oestersund	13085	29	14	78	-12	71	M	15	133	2125	1760.6	27.4	204	45	299.3	133	38	-94.2	10.7	2.6	1992	35.3	28	48.6	6.8	2.3	-22.4
BT1415SWRLCP01SMPU	2014	36	Oestersund	13085	29	14	78	-12	71	M	16	60	2125.8	1779.7	101.4	184.7	9	63.2	60	57.1	-20.2	-9.1	3.1	2065.8	109.1	-45	67.7	7.3	-17.5	51.6
BT1415SWRLCP01SMPU	2014	36	Oestersund	13085	29	14	78	-12	71	M	17	88	2130.6	1752.8	98.1	191.7	23	31.6	88	30.2	-23.5	6.8	-5.8	2042.6	85.9	-17	40.8	-1.6	-1.6	48.3
BT1415SWRLCP01SMPU	2014	36	Oestersund	13085	29	14	78	-12	71	M	18	97	2130.7	1726	97.3	210.4	27	75	97	3.4	-24.3	22.3	-2.6	2033.7	77	-8	14	1.6	13.9	47.5
BT1415SWRLCP01SMPU	2014	36	Oestersund	13085	29	14	78	-12	71	M	19	39	2147.4	1749.8	149.1	209.5	4	26.7	39	27.2	27.5	18.1	0.7	2108.4	151.7	-66	37.8	4.9	9.7	99.3
BT1415SWRLCP01SMPU	2014	36	Oestersund	13085	29	14	78	-12	71	M	20	28	2150	1762.2	151.2	208.6	2	0	28	39.6	29.6	28.7	-10.8	2122	165.3	-77	50.2	-6.6	20.3	101.4
BT1415SWRLCP01SMPU	2014	36	Oestersund	13085	29	14	78	-12	71	M	21	108	2156.7	1783.4	53.5	211.8	33	130.5	108	60.8	-68.1	16	5.1	2048.7	92	3	71.4	9.3	7.6	3.7
BT1415SWRLCP01SMPU	2014	36	Oestersund	13085	29	14	78	-12	71	M	22	120	2161.5	1783.4	53.8	204.3	38	195	120	60.8	-67.8	3	10.6	2041.5	84.8	15	71.4	14.8	-5.4	4
BT1415SWRLCP01SMPU	2014	36	Oestersund	13085	29	14	78	-12	71	M	23	68	2163.8	1750.9	147.4	197.5	12	28.1	68	28.3	25.8	7.7	-0.9	2095.8	139.1	-37	38.9	3.3	-0.7	97.6
BT1415SWRLCP01SMPU	2014	36	Oestersund	13085	29	14	78	-12	71	M	24	62	2165.2	1762.8	148	192.4	10	90.9	62	40.2	26.4	-2.4	4.1	2103.2	146.5	-43	50.8	8.3	-10.8	98.2
BT1415SWRLCP01SMPU	2014	36	Oestersund	13085	29	14	78	-12	71	M	25	106	2165.4	1785.7	51.1	222.6	32	149.3	106	63.1	-70.5	29.6	2.3	2059.4	102.7	1	73.7	6.5	21.2	1.3
BT1415SWRLCP01SMPU	2014	36	Oestersund	13085	29	14	78	-12	71	M	26	126	2166.1	1729.9	100.3	209.9	43	152.2	126	7.3	-21.3	12.6	6.6	2040.1	83.4	21	17.9	10.8	4.2	50.5
BT1415SWRLCP01SMPU	2014	36	Oestersund	13085	29	14	78	-12	71	M	27	124	2174.7	1775.2	74.8	200.7	41	151.1	124	52.6	-46.8	4.9	5.1	2050.7	94	19	63.2	9.3	-3.5	25
BT1415SWRLCP01SMPU	2014	36	Oestersund	13085	29	14	78	-12	71	M	28	68	2183.2	1731.2	169.7	214.3	13	128.9	68	8.6	48.1	21.5	2.1	2115.2	158.5	-37	19.2	6.3	13.1	119.9
BT1415SWRLCP01SMPU	2014	36	Oestersund	13085	29	14	78	-12	71	M	29	106	2184.2	1767	100.9	210.3	31	26.8	106	44.4	-20.7	18.5	1.1	2078.2	121.5	1	55	5.3	10.1	51.1
BT1415SWRLCP01SMPU	2014	36	Oestersund	13085	29	14	78	-12	71	M	30	124	2186	1715.3	150.5	196.2	40	374.3	124	-7.3	28.9	7.5	-2	2062	105.3	19	3.3	2.2	-0.9	100.7
BT1415SWRLCP02SMPU	2014	38	Hochfilzen	12750	33	20	91	2.1	73	M	23	58	2128.2	1814.3	44.5	211.4	17	73.5	30	97.4	19.3	8	-0.2	2070.2	124.5	30	97.4	-0.2	8	19.3
BT1415SWRLCP02SMPU	2014	38	Hochfilzen	12750	33	20	91	2.1	73	M	28	67	2134.5	1789	67.5	211	21	155.4	39	72.1	42.3	11	-3.6	2067.5	121.8	39	72.1	-3.6	11	42.3
BT1415SWRLCP02SMPU	2014	38	Hochfilzen	12750	33	20	91	2.1	73	M	1	28	1973.7	1716.9	25.2	203.6	7	45.1	0	0	0	0	0	1945.7	0	0	0	0	0	0
BT1415SWRLCP02SMPU	2014	38	Hochfilzen	12750	33	20	91	2.1	73	M	2	14	1977.8	1733.3	24.8	205.7	2	16.2	-14	16.4	-0.4	4	-1.9	1963.8	18.1	-14	16.4	-1.9	4	-0.4
BT1415SWRLCP02SMPU	2014	38	Hochfilzen	12750	33	20	91	2.1	73	M	3	23	1984.6	1719.6	47.7	194.3	5	56.2	-5	2.7	22.5	-10	0.7	1961.6	15.9	-5	2.7	0.7	-10	22.5
BT1415SWRLCP01SWPU	2014	38	Hochfilzen	12750	33	20	91	2.1	73	M	4	0	1989.9	1722.8	73.6	193.5	1	336.2	-28	5.9	48.4	-8	-2.1	1989.9	44.2	-28	5.9	-2.1	-8	48.4
BT1415SWRLCP02SMPU	2014	38	Hochfilzen	12750	33	20	91	2.1	73	M	5	39	2002.2	1708.8	44.8	209.6	11	56.5	11	-8.1	19.6	7	-1	1963.2	17.5	11	-8.1	-1	7	19.6
BT1415SWRLCP02SMPU	2014	38	Hochfilzen	12750	33	20	91	2.1	73	M	6	27	2018.8	1738	44.6	209.2	6	10.9	-1	21.1	19.4	2	3.6	1991.8	46.1	-1	21.1	3.6	2	19.4
BT1415SWRLCP02SMPU	2014	38	Hochfilzen	12750	33	20	91	2.1	73	M	7	18	2022.5	1737.4	69.5	197.6	3	4.1	-10	20.5	44.3	-5	-1	2004.5	58.8	-10	20.5	-1	-5	44.3
BT1415SWRLCP02SMPU	2014	38	Hochfilzen	12750	33	20	91	2.1	73	M	8	23	2029.9	1712	95	199.9	4	48.8	-5	-4.9	69.8	-2	-1.7	2006.9	61.2	-5	-4.9	-1.7	-2	69.8
BT1415SWRLCP02SMPU	2014	38	Hochfilzen	12750	33	20	91	2.1	73	M	9	34	2030.2	1719.2	66.1	210.9	10	97.7	6	2.3	40.9	5	2.3	1996.2	50.5	6	2.3	2.3	5	40.9
BT1415SWRLCP02SMPU	2014	38	Hochfilzen	12750	33	20	91	2.1	73	M	10	29	2036.3	1729.4	65.2	212.7	8	0	1	12.5	40	11	-1.9	2007.3	61.6	1	12.5	-1.9	11	40
BT1415SWRLCP02SMPU	2014	38	Hochfilzen	12750	33	20	91	2.1	73	M	11	58	2040.9	1727.9	45.8	209.2	19	173.2	30	11	20.6	6	-0.4	1982.9	37.2	30	11	-0.4	6	20.6
BT1415SWRLCP02SMPU	2014	38	Hochfilzen	12750	33	20	91	2.1	73	M	12	53	2043.2	1739.3	47.9	203	15	123.9	25	22.4	22.7	4	-4.6	1990.2	44.5	25	22.4	-4.6	4	22.7
BT1415SWRLCP02SMPU	2014	38	Hochfilzen	12750	33	20	91	2.1	73	M	13	56	2047.2	1731.8	67.6	191.8	16	69.5	28	14.9	42.4	-13	1.2	1991.2	45.5	28	14.9	1.2	-13	42.4
BT1415SWRLCP02SMPU	2014	38	Hochfilzen	12750	33	20	91	2.1	73	M	14	31	2071.4	1743.8	96.6	200	9	62.6	3	26.9	71.4	-8	4.4	2040.4	94.7	3	26.9	4.4	-8	71.4
BT1415SWRLCP02SMPU	2014	38	Hochfilzen	12750	33	20	91	2.1	73	M	15	118	2079.9	1725.2	22.4	214.3	45	319.6	90	8.3	-2.8	13	-2.3	1961.9	16.2	90	8.3	-2.3	13	-2.8
BT1415SWRLCP02SMPU	2014	38	Hochfilzen	12750	33	20	91	2.1	73	M	16	75	2089.3	1727.8	90.4	196.1	25	115.7	47	10.9	65.2	-8	0.5	2014.3	68.6	47	10.9	0.5	-8	65.2
BT1415SWRLCP02SMPU	2014	38	Hochfilzen	12750	33	20	91	2.1	73	M	17	75	2089.4	1714.5	89.2	210.7	24	147.1	47	-2.4	64	9	-1.9	2014.4	68.7	47	-2.4	-1.9	9	64
BT1415SWRLCP02SMPU	2014	38	Hochfilzen	12750	33	20	91	2.1	73	M	18	94	2097.6	1722.7	67.9	213	29	362.5	66	5.8	42.7	15	-5.6	2003.6	57.9	66	5.8	-5.6	15	42.7
BT1415SWRLCP02SMPU	2014	38	Hochfilzen	12750	33	20	91	2.1	73	M	19	48	2097.6	1757.9	90.9	200.8	14	155.6	20	41	65.7	-4	1.2	2049.6	103.9	20	41	1.2	-4	65.7
BT1415SWRLCP02SMPU	2014	38	Hochfilzen	12750	33	20	91	2.1	73	M	20	39	2099.4	1722.2	135.3	202.9	12	28.5	11	5.3	110.1	2	-2.7	2060.4	114.7	11	5.3	-2.7	2	110.1
BT1415SWRLCP02SMPU	2014	38	Hochfilzen	12750	33	20	91	2.1	73	M	21	72	2120.8	1751	92.1	205.7	23	180.6	44	34.1	66.9	5	-2.9	2048.8	103.1	44	34.1	-2.9	5	66.9
BT1415SWRLCP02SMPU	2014	38	Hochfilzen	12750	33	20	91	2.1	73	M	22	127	2123.7	1738.8	47.3	210.6	47	354.1	99	21.9	22.1	7	0	1996.7	51	99	21.9	0	7	22.1
BT1415SWRLCP02SMPU	2014	38	Hochfilzen	12750	33	20	91	2.1	73	M	24	63	2129.1	1769.6	69.2	227.3	20	67.2	35	52.7	44	29	-5.3	2066.1	120.4	35	52.7	-5.3	29	44
BT1415SWRLCP02SMPU	2014	38	Hochfilzen	12750	33	20	91	2.1	73	M	25	40	2129.3	1737.3	136.3	215.7	13	125.7	12	20.4	111.1	10	2.1	2089.3	143.6	12	20.4	2.1	10	111.1
BT1415SWRLCP02SMPU	2014	38	Hochfilzen	12750	33	20	91	2.1	73	M	26	96	2132.4	1738.5	94.3	203.6	30	123.9	68	21.6	69.1	-3	3	2036.4	90.7	68	21.6	3	-3	69.1
BT1415SWRLCP02SMPU	2014	38	Hochfilzen	12750	33	20	91	2.1	73	M	27	100	2133.3	1749.8	94.2	189.3	34	254.3	72	32.9	69	-11	-3.3	2033.3	87.6	72	32.9	-3.3	-11	69
BT1415SWRLCP02SMPU	2014	38	Hochfilzen	12750	33	20	91	2.1	73	M	29	85	2135.1	1756.2	68.1	225.8	27	179.8	57	39.3	42.9	28	-5.8	2050.1	104.4	57	39.3	-5.8	28	42.9
BT1415SWRLCP02SMPU	2014	38	Hochfilzen	12750	33	20	91	2.1	73	M	30	111	2137.2	1717.1	117.5	191.6	39	218.2	83	0.2	92.3	-14	2	2026.2	80.5	83	0.2	2	-14	92.3
BT1415SWRLCP03SMPU	2014	40	Pokljuka	12375	39	33	92	4.1	62	M	1	24	1843.3	1631.1	26.6	161.6	3	72.9	0	0	0	0	0	1819.3	6.9	-82	25	-3.7	2	-16.4
BT1415SWRLCP02SWPU	2014	40	Pokljuka	12375	39	33	92	4.1	62	M	2	0	1861.1	1630.7	70.7	159.7	1	227.6	-24	-0.4	44.1	7	-8.9	1861.1	48.7	-106	24.6	-12.6	9	27.7
BT1415SWRLCP03SMPU	2014	40	Pokljuka	12375	39	33	92	4.1	62	M	13	96	1938.1	1614.5	21.5	206.1	37	239.9	72	-16.6	-5.1	36	8.5	1842.1	29.7	-10	8.4	4.8	38	-21.5
BT1415SWRLCP03SMPU	2014	40	Pokljuka	12375	39	33	92	4.1	62	M	3	30	1902.8	1643.3	49.5	180	4	0	6	12.2	22.9	23	-4.6	1872.8	60.4	-76	37.2	-8.3	25	6.5
BT1415SWRLCP03SMPU	2014	40	Pokljuka	12375	39	33	92	4.1	62	M	4	12	1916.2	1628	94.2	182	2	17.8	-12	-3.1	67.6	21	-0.6	1904.2	91.8	-94	21.9	-4.3	23	51.2
BT1415SWRLCP03SMPU	2014	40	Pokljuka	12375	39	33	92	4.1	62	M	5	56	1917.5	1616.7	67.1	177.7	18	124.9	32	-14.4	40.5	11	5.1	1861.5	49.1	-50	10.6	1.4	13	24.1
BT1415SWRLCP03SMPU	2014	40	Pokljuka	12375	39	33	92	4.1	62	M	6	106	1918.4	1606.1	43	163.3	45	124.9	82	-25	16.4	-2	3.7	1812.4	0	0	0	0	0	0
BT1415SWRLCP03SMPU	2014	40	Pokljuka	12375	39	33	92	4.1	62	M	7	54	1920.8	1604.3	88.5	174	14	127.3	30	-26.8	61.9	14	-1.6	1866.8	54.4	-52	-1.8	-5.3	16	45.5
BT1415SWRLCP03SMPU	2014	40	Pokljuka	12375	39	33	92	4.1	62	M	8	47	1923.5	1593.4	114.3	168.8	10	147.3	23	-37.7	87.7	10	-2.8	1876.5	64.1	-59	-12.7	-6.5	12	71.3
BT1415SWRLCP03SMPU	2014	40	Pokljuka	12375	39	33	92	4.1	62	M	9	81	1923.7	1578.4	89.9	174.4	27	116	57	-52.7	63.3	8	4.8	1842.7	30.3	-25	-27.7	1.1	10	46.9
BT1415SWRLCP03SMPU	2014	40	Pokljuka	12375	39	33	92	4.1	62	M	10	54	1931.2	1636.6	65.2	175.4	15	77.5	30	5.5	38.6	20	-6.2	1877.2	64.8	-52	30.5	-9.9	22	22.2
BT1415SWRLCP03SMPU	2014	40	Pokljuka	12375	39	33	92	4.1	62	M	11	76	1932.1	1615.2	63.6	177.3	24	91	52	-15.9	37	16	-0.3	1856.1	43.7	-30	9.1	-4	18	20.6
BT1415SWRLCP03SMPU	2014	40	Pokljuka	12375	39	33	92	4.1	62	M	12	72	1934.3	1605.7	65.5	191.1	23	97.7	48	-25.4	38.9	26	3.5	1862.3	49.9	-34	-0.4	-0.2	28	22.5
BT1415SWRLCP03SMPU	2014	40	Pokljuka	12375	39	33	92	4.1	62	M	14	71	1941	1585.5	107.5	177	22	177.2	47	-45.6	80.9	17	-1.6	1870	57.6	-35	-20.6	-5.3	19	64.5
BT1415SWRLCP03SMPU	2014	40	Pokljuka	12375	39	33	92	4.1	62	M	15	95	1944.7	1629.8	43.3	176.6	35	142.7	71	-1.3	16.7	11	4	1849.7	37.3	-11	23.7	0.3	13	0.3
BT1415SWRLCP03SMPU	2014	40	Pokljuka	12375	39	33	92	4.1	62	M	16	34	1944.8	1621.9	111.3	177.6	5	59.5	10	-9.2	84.7	15	1	1910.8	98.4	-72	15.8	-2.7	17	68.3
BT1415SWRLCP03SMPU	2014	40	Pokljuka	12375	39	33	92	4.1	62	M	17	38	1947.2	1613.1	114.3	181.8	7	110.5	14	-18	87.7	18	2.2	1909.2	96.8	-68	7	-1.5	20	71.3
BT1415SWRLCP03SMPU	2014	40	Pokljuka	12375	39	33	92	4.1	62	M	18	52	1947.5	1621.9	105.7	167.9	12	204.3	28	-9.2	79.1	9	-2.7	1895.5	83.1	-54	15.8	-6.4	11	62.7
BT1415SWRLCP03SMPU	2014	40	Pokljuka	12375	39	33	92	4.1	62	M	19	36	1953.8	1637.5	90.2	190.1	6	101.5	12	6.4	63.6	26	2.5	1917.8	105.4	-70	31.4	-1.2	28	47.2
BT1415SWRLCP03SMPU	2014	40	Pokljuka	12375	39	33	92	4.1	62	M	20	99	1958.7	1637.3	44.4	178	41	215.7	75	6.2	17.8	11	5.4	1859.7	47.3	-7	31.2	1.7	13	1.4
BT1415SWRLCP03SMPU	2014	40	Pokljuka	12375	39	33	92	4.1	62	M	21	81	1959.3	1609	88.9	180.4	26	116.8	57	-22.1	62.3	17	1.8	1878.3	65.9	-25	2.9	-1.9	19	45.9
BT1415SWRLCP03SMPU	2014	40	Pokljuka	12375	39	33	92	4.1	62	M	22	76	1960.1	1633.1	87	164	25	88.8	52	2	60.4	-4	6.4	1884.1	71.7	-30	27	2.7	-2	44
BT1415SWRLCP03SMPU	2014	40	Pokljuka	12375	39	33	92	4.1	62	M	23	89	1960.2	1632.5	69.6	169.1	33	128.8	65	1.4	43	7	0.5	1871.2	58.8	-17	26.4	-3.2	9	26.6
BT1415SWRLCP03SMPU	2014	40	Pokljuka	12375	39	33	92	4.1	62	M	24	101	1960.7	1610.5	90.3	158.9	43	133.9	77	-20.6	63.7	-4	1.3	1859.7	47.3	-5	4.4	-2.4	-2	47.3
BT1415SWRLCP03SMPU	2014	40	Pokljuka	12375	39	33	92	4.1	62	M	25	82	1961.3	1630.7	65	183.6	28	80.4	58	-0.4	38.4	16	6	1879.3	66.9	-24	24.6	2.3	18	22
BT1415SWRLCP03SMPU	2014	40	Pokljuka	12375	39	33	92	4.1	62	M	26	56	1968.2	1636.6	86.5	189.1	17	127.3	32	5.5	59.9	22	5.5	1912.2	99.8	-50	30.5	1.8	24	43.5
BT1415SWRLCP03SMPU	2014	40	Pokljuka	12375	39	33	92	4.1	62	M	27	101	1968.2	1620.7	69.1	177.4	44	117.4	77	-10.4	42.5	11	4.8	1867.2	54.8	-5	14.6	1.1	13	26.1
BT1415SWRLCP03SMPU	2014	40	Pokljuka	12375	39	33	92	4.1	62	M	28	53	1970.6	1651.3	94	172.3	13	104.2	29	20.2	67.4	7	3.7	1917.6	105.2	-53	45.2	0	9	51
BT1415SWRLCP03SMPU	2014	40	Pokljuka	12375	39	33	92	4.1	62	M	29	54	1970.6	1627.9	109.3	179.4	16	87.9	30	-3.2	82.7	16	1.8	1916.6	104.2	-52	21.8	-1.9	18	66.3
BT1415SWRLCP03SMPU	2014	40	Pokljuka	12375	39	33	92	4.1	62	M	30	86	1971.4	1637.5	67.7	180.2	31	172.5	62	6.4	41.1	16	2.6	1885.4	73	-20	31.4	-1.1	18	24.7
BT1415SWRLCP06SMPU	2014	42	Anterselva	12850	26	11	71	1.5	42	M	2	36	1888	1639	56.4	156.6	8	73.7	36	9.7	-16.7	-31	2.1	1852	12.2	-44	15.7	1.5	-29	24
BT1415SWRLCP03SWPU	2014	42	Anterselva	12850	26	11	71	1.5	42	M	1	0	1887.9	1629.3	73.1	185.5	1	214.2	0	0	0	0	0	1887.9	48.1	-80	6	-0.6	2	40.7
BT1415SWRLCP06SMPU	2014	42	Anterselva	12850	26	11	71	1.5	42	M	3	14	1889	1645.1	57.6	172.3	2	0	14	15.8	-15.5	-11	-2.2	1875	35.2	-66	21.8	-2.8	-9	25.2
BT1415SWRLCP06SMPU	2014	42	Anterselva	12850	26	11	71	1.5	42	M	4	43	1889.8	1647.7	33.6	165.5	9	0.1	43	18.4	-39.5	-19	-1	1846.8	7	-37	24.4	-1.6	-17	1.2
BT1415SWRLCP06SMPU	2014	42	Anterselva	12850	26	11	71	1.5	42	M	5	80	1919.8	1623.3	32.4	184.1	25	187.4	80	-6	-40.7	-2	0.6	1839.8	0	0	0	0	0	0
BT1415SWRLCP06SMPU	2014	42	Anterselva	12850	26	11	71	1.5	42	M	6	68	1933.5	1648.7	33.3	183.5	19	56.6	68	19.4	-39.8	-4	2	1865.5	25.7	-12	25.4	1.4	-2	0.9
BT1415SWRLCP06SMPU	2014	42	Anterselva	12850	26	11	71	1.5	42	M	7	20	1939.3	1645.8	93.1	180.4	3	1.1	20	16.5	20	-3	-2.1	1919.3	79.5	-60	22.5	-2.7	-1	60.7
BT1415SWRLCP06SMPU	2014	42	Anterselva	12850	26	11	71	1.5	42	M	8	67	1944.5	1647.1	54	176.4	18	101.8	67	17.8	-19.1	-12	2.9	1877.5	37.7	-13	23.8	2.3	-10	21.6
BT1415SWRLCP06SMPU	2014	42	Anterselva	12850	26	11	71	1.5	42	M	9	51	1946.9	1640.1	72.8	183	13	84.8	51	10.8	-0.3	-2	-0.5	1895.9	56.1	-29	16.8	-1.1	0	40.4
BT1415SWRLCP06SMPU	2014	42	Anterselva	12850	26	11	71	1.5	42	M	10	48	1947.9	1650.5	51.3	198.1	11	61.4	48	21.2	-21.8	8	4.6	1899.9	60.1	-32	27.2	4	10	18.9
BT1415SWRLCP06SMPU	2014	42	Anterselva	12850	26	11	71	1.5	42	M	11	46	1949.3	1645	73.8	184.5	10	1.9	46	15.7	0.7	-6	5	1903.3	63.5	-34	21.7	4.4	-4	41.4
BT1415SWRLCP06SMPU	2014	42	Anterselva	12850	26	11	71	1.5	42	M	12	84	1950.3	1654.8	31.9	179.6	30	128.3	84	25.5	-41.2	-8	2.1	1866.3	26.5	4	31.5	1.5	-6	-0.5
BT1415SWRLCP06SMPU	2014	42	Anterselva	12850	26	11	71	1.5	42	M	13	34	1961.6	1625.4	112.8	189.4	7	117.9	34	-3.9	39.7	4	-0.1	1927.6	87.8	-46	2.1	-0.7	6	80.4
BT1415SWRLCP06SMPU	2014	42	Anterselva	12850	26	11	71	1.5	42	M	14	61	1964.5	1680.2	51.9	171.4	16	243.7	61	50.9	-21.2	-19	4.9	1903.5	63.7	-19	56.9	4.3	-17	19.5
BT1415SWRLCP06SMPU	2014	42	Anterselva	12850	26	11	71	1.5	42	M	15	49	1972.7	1671	71.7	181	12	60	49	41.7	-1.4	-4	-0.5	1923.7	83.9	-31	47.7	-1.1	-2	39.3
BT1415SWRLCP06SMPU	2014	42	Anterselva	12850	26	11	71	1.5	42	M	16	64	1989.7	1651	93	181.7	17	76.6	64	21.7	19.9	-8	4.2	1925.7	85.9	-16	27.7	3.6	-6	60.6
BT1415SWRLCP06SMPU	2014	42	Anterselva	12850	26	11	71	1.5	42	M	17	83	1994.7	1652.4	76	183.3	28	258.1	83	23.1	2.9	-4	1.8	1911.7	71.9	3	29.1	1.2	-2	43.6
BT1415SWRLCP06SMPU	2014	42	Anterselva	12850	26	11	71	1.5	42	M	18	24	2005.8	1667.8	121.3	192.7	5	164.3	24	38.5	48.2	6	1.2	1981.8	142	-56	44.5	0.6	8	88.9
BT1415SWRLCP06SMPU	2014	42	Anterselva	12850	26	11	71	1.5	42	M	19	102	2006.1	1669	52.7	182.4	37	299.2	102	39.7	-20.4	-6	2.9	1904.1	64.3	22	45.7	2.3	-4	20.3
BT1415SWRLCP06SMPU	2014	42	Anterselva	12850	26	11	71	1.5	42	M	20	72	2009.6	1686	54.6	197	20	45.6	72	56.7	-18.5	4	7.5	1937.6	97.8	-8	62.7	6.9	6	22.2
BT1415SWRLCP06SMPU	2014	42	Anterselva	12850	26	11	71	1.5	42	M	21	84	2016.2	1634.9	94.5	202.8	29	106.8	84	5.6	21.4	15	2.3	1932.2	92.4	4	11.6	1.7	17	62.1
BT1415SWRLCP06SMPU	2014	42	Anterselva	12850	26	11	71	1.5	42	M	22	85	2035.3	1658.7	96	195.6	31	62.4	85	29.4	22.9	6	4.1	1950.3	110.5	5	35.4	3.5	8	63.6
BT1415SWRLCP06SMPU	2014	42	Anterselva	12850	26	11	71	1.5	42	M	23	82	2036.9	1649.8	116	189.1	26	31.9	82	20.5	42.9	3	0.6	1954.9	115.1	2	26.5	0	5	83.6
BT1415SWRLCP06SMPU	2014	42	Anterselva	12850	26	11	71	1.5	42	M	24	78	2037.8	1663.7	98.7	197.4	23	152.6	78	34.4	25.6	10	1.9	1959.8	120	-2	40.4	1.3	12	66.3
BT1415SWRLCP06SMPU	2014	42	Anterselva	12850	26	11	71	1.5	42	M	25	120	2040	1676.1	57.2	186.7	46	168.8	120	46.8	-15.9	-4	5.2	1920	80.2	40	52.8	4.6	-2	24.8
BT1415SWRLCP06SMPU	2014	42	Anterselva	12850	26	11	71	1.5	42	M	26	78	2040.5	1647.9	116.1	198.5	22	187.9	78	18.6	43	10	3	1962.5	122.7	-2	24.6	2.4	12	83.7
BT1415SWRLCP06SMPU	2014	42	Anterselva	12850	26	11	71	1.5	42	M	27	125	2048.7	1664	53	206.7	54	263.4	125	34.7	-20.1	17	4.2	1923.7	83.9	45	40.7	3.6	19	20.6
BT1415SWRLCP06SMPU	2014	42	Anterselva	12850	26	11	71	1.5	42	M	28	21	2052.2	1686.4	146.2	198.6	4	51.4	21	57.1	73.1	10	3.1	2031.2	191.4	-59	63.1	2.5	12	113.8
BT1415SWRLCP06SMPU	2014	42	Anterselva	12850	26	11	71	1.5	42	M	29	120	2056.7	1692.9	56.6	187.2	45	175.7	120	63.6	-16.5	-6	7.7	1936.7	96.9	40	69.6	7.1	-4	24.2
BT1415SWRLCP06SMPU	2014	42	Anterselva	12850	26	11	71	1.5	42	M	30	99	2057.2	1634.7	131.8	191.7	34	216.7	99	5.4	58.7	10	-3.8	1958.2	118.4	19	11.4	-4.4	12	99.4
BT1415SWRLCP07SMPU	2014	44	NoveMesto	13020	46	28	84	-2.6	63	M	29	82	2436.6	2048.2	93.7	212.7	28	223.9	82	37.3	45.6	21	5.8	2354.6	132.1	14	49.8	-1.1	35	48.4
BT1415SWRLCP06SWPU	2014	44	NoveMesto	13020	46	28	84	-2.6	63	M	1	0	2244.9	2010.9	48.1	185.9	1	309.9	0	0	0	0	0	2244.9	22.4	-68	12.5	-6.9	14	2.8
BT1415SWRLCP07SMPU	2014	44	NoveMesto	13020	46	28	84	-2.6	63	M	2	13	2249.3	2011.2	44.6	180.5	2	0	13	0.3	-3.5	-7	1.6	2236.3	13.8	-55	12.8	-5.3	7	-0.7
BT1415SWRLCP07SMPU	2014	44	NoveMesto	13020	46	28	84	-2.6	63	M	3	26	2258.2	2027.3	26.4	178.5	4	149.7	26	16.4	-21.7	-9	1.6	2232.2	9.7	-42	28.9	-5.3	5	-18.9
BT1415SWRLCP07SMPU	2014	44	NoveMesto	13020	46	28	84	-2.6	63	M	4	41	2265.2	2022	21.4	180.8	8	24.1	41	11.1	-26.7	-14	8.9	2224.2	1.7	-27	23.6	2	0	-23.9
BT1415SWRLCP07SMPU	2014	44	NoveMesto	13020	46	28	84	-2.6	63	M	5	38	2269	2031.1	22.8	177.1	7	133.3	38	20.2	-25.3	-21	12.2	2231	8.5	-30	32.7	5.3	-7	-22.5
BT1415SWRLCP07SMPU	2014	44	NoveMesto	13020	46	28	84	-2.6	63	M	6	68	2290.5	1998.4	45.3	178.8	19	46.8	68	-12.5	-2.8	-14	6.9	2222.5	0	0	0	0	0	0
BT1415SWRLCP07SMPU	2014	44	NoveMesto	13020	46	28	84	-2.6	63	M	7	67	2291.7	2022.5	20.1	182.1	18	185.4	67	11.6	-28	-14	10.2	2224.7	2.2	-1	24.1	3.3	0	-25.2
BT1415SWRLCP07SMPU	2014	44	NoveMesto	13020	46	28	84	-2.6	63	M	8	60	2299.6	2016.8	44.5	178.3	13	211.1	60	5.9	-3.6	-16	8.4	2239.6	17.1	-8	18.4	1.5	-2	-0.8
BT1415SWRLCP07SMPU	2014	44	NoveMesto	13020	46	28	84	-2.6	63	M	9	42	2306.8	2013.4	66.6	184.8	9	20.3	42	2.5	18.5	-11	9.9	2264.8	42.3	-26	15	3	3	21.3
BT1415SWRLCP07SMPU	2014	44	NoveMesto	13020	46	28	84	-2.6	63	M	10	63	2307.2	2026.7	21	196.5	15	54.7	63	15.8	-27.1	-2	12.6	2244.2	21.7	-5	28.3	5.7	12	-24.3
BT1415SWRLCP07SMPU	2014	44	NoveMesto	13020	46	28	84	-2.6	63	M	11	27	2322.8	2054.2	44.7	196.9	5	13.3	27	43.3	-3.4	1	10	2295.8	73.3	-41	55.8	3.1	15	-0.6
BT1415SWRLCP07SMPU	2014	44	NoveMesto	13020	46	28	84	-2.6	63	M	12	44	2340.6	2044.5	69.6	182.5	10	61.9	44	33.6	21.5	-12	8.6	2296.6	74.1	-24	46.1	1.7	2	24.3
BT1415SWRLCP07SMPU	2014	44	NoveMesto	13020	46	28	84	-2.6	63	M	13	76	2361.3	2050.3	43.9	191.1	23	193	76	39.4	-4.2	-4	9.2	2285.3	62.8	8	51.9	2.3	10	-1.4
BT1415SWRLCP07SMPU	2014	44	NoveMesto	13020	46	28	84	-2.6	63	M	14	30	2378.2	2076.1	91.6	180.5	6	77.9	30	65.2	43.5	-11	5.6	2348.2	125.7	-38	77.7	-1.3	3	46.3
BT1415SWRLCP07SMPU	2014	44	NoveMesto	13020	46	28	84	-2.6	63	M	15	93	2392.5	2024.7	89.5	185.3	34	288.4	93	13.8	41.4	-4	3.4	2299.5	77	25	26.3	-3.5	10	44.2
BT1415SWRLCP07SMPU	2014	44	NoveMesto	13020	46	28	84	-2.6	63	M	16	26	2394.6	2092.4	93.6	182.6	3	4.4	26	81.5	45.5	-16	12.7	2368.6	146.1	-42	94	5.8	-2	48.3
BT1415SWRLCP07SMPU	2014	44	NoveMesto	13020	46	28	84	-2.6	63	M	17	50	2395.9	2061.5	96.5	187.9	11	95.7	50	50.6	48.4	-7	9	2345.9	123.4	-18	63.1	2.1	7	51.2
BT1415SWRLCP07SMPU	2014	44	NoveMesto	13020	46	28	84	-2.6	63	M	18	100	2399.4	2065.6	45.5	188.3	37	180.7	100	54.7	-2.6	-2	4.4	2299.4	76.9	32	67.2	-2.5	12	0.2
BT1415SWRLCP07SMPU	2014	44	NoveMesto	13020	46	28	84	-2.6	63	M	19	70	2401.5	2045.4	92.1	194	21	159.2	70	34.5	44	1	7.1	2331.5	109	2	47	0.2	15	46.8
BT1415SWRLCP07SMPU	2014	44	NoveMesto	13020	46	28	84	-2.6	63	M	20	65	2402.8	2066.7	90.8	180.3	16	62.3	65	55.8	42.7	-8	2.4	2337.8	115.3	-3	68.3	-4.5	6	45.5
BT1415SWRLCP07SMPU	2014	44	NoveMesto	13020	46	28	84	-2.6	63	M	21	69	2404.1	2032.2	114.3	188.6	20	45.6	69	21.3	66.2	-5	7.7	2335.1	112.6	1	33.8	0.8	9	69
BT1415SWRLCP07SMPU	2014	44	NoveMesto	13020	46	28	84	-2.6	63	M	22	121	2405.9	2040.4	43.6	200.9	48	274.8	121	29.5	-4.5	8	7	2284.9	62.4	53	42	0.1	22	-1.7
BT1415SWRLCP07SMPU	2014	44	NoveMesto	13020	46	28	84	-2.6	63	M	23	109	2413.9	2049.7	70.3	184.9	43	243.7	109	38.8	22.2	-8	7	2304.9	82.4	41	51.3	0.1	6	25
BT1415SWRLCP07SMPU	2014	44	NoveMesto	13020	46	28	84	-2.6	63	M	24	100	2425.6	2040.2	87.7	197.7	36	211.8	100	29.3	39.6	2	9.8	2325.6	103.1	32	41.8	2.9	16	42.4
BT1415SWRLCP07SMPU	2014	44	NoveMesto	13020	46	28	84	-2.6	63	M	25	112	2427.7	2056.8	66.7	192.2	45	255.1	112	45.9	18.6	2	4.3	2315.7	93.2	44	58.4	-2.6	16	21.4
BT1415SWRLCP07SMPU	2014	44	NoveMesto	13020	46	28	84	-2.6	63	M	26	83	2429.4	2045.1	112.4	188.9	29	191.7	83	34.2	64.3	-2	5	2346.4	123.9	15	46.7	-1.9	12	67.1
BT1415SWRLCP07SMPU	2014	44	NoveMesto	13020	46	28	84	-2.6	63	M	27	65	2430.3	2076.9	123	165.4	17	157.9	65	66	74.9	-27	6.5	2365.3	142.8	-3	78.5	-0.4	-13	77.7
BT1415SWRLCP07SMPU	2014	44	NoveMesto	13020	46	28	84	-2.6	63	M	28	103	2432.3	2095.5	46.1	187.7	40	306.2	103	84.6	-2	-7	8.8	2329.3	106.8	35	97.1	1.9	7	0.8
BT1415SWRLCP07SMPU	2014	44	NoveMesto	13020	46	28	84	-2.6	63	M	30	73	2437.9	2079.7	92.4	192.8	22	156.6	73	68.8	44.3	3	3.9	2364.9	142.4	5	81.3	-3	17	47.1
BT1415SWRLCP09SMPU	2014	46	Khanty	12540	49	23	80	3.2	55	M	1	34	1924.9	1672.6	49.9	168.4	5	94.9	0	0	0	0	0	1890.9	0	0	0	0	0	0
BT1415SWRLCP09SMPU	2014	46	Khanty	12540	49	23	80	3.2	55	M	2	18	1948.9	1673	71.3	186.6	3	35.7	-16	0.4	21.4	24.2	-6	1930.9	40	-16	0.4	-6	24.2	21.4
BT1415SWRLCP09SMPU	2014	46	Khanty	12540	49	23	80	3.2	55	M	24	116	2068.2	1714.1	51.8	186.3	53	267.9	82	41.5	1.9	3	14.9	1952.2	61.3	82	41.5	14.9	3	1.9
BT1415SWRLCP09SMPU	2014	46	Khanty	12540	49	23	80	3.2	55	M	3	13	1960.6	1658	115.2	174.4	2	40.3	-21	-14.6	65.3	9	-3	1947.6	56.7	-21	-14.6	-3	9	65.3
BT1415SWRLCP07SWPU	2014	46	Khanty	12540	49	23	80	3.2	55	M	4	0	1965.2	1664.6	116.7	183.9	1	435.9	-34	-8	66.8	15.3	0.2	1965.2	74.3	-34	-8	0.2	15.3	66.8
BT1415SWRLCP09SMPU	2014	46	Khanty	12540	49	23	80	3.2	55	M	5	49	1974.1	1663.2	72.3	189.6	11	163.4	15	-9.4	22.4	15.2	6	1925.1	34.2	15	-9.4	6	15.2	22.4
BT1415SWRLCP09SMPU	2014	46	Khanty	12540	49	23	80	3.2	55	M	6	34	1983	1664.7	94.9	189.4	6	0	0	-7.9	45	23.8	-2.8	1949	58.1	0	-7.9	-2.8	23.8	45
BT1415SWRLCP09SMPU	2014	46	Khanty	12540	49	23	80	3.2	55	M	7	36	1995.7	1712.6	28.2	218.9	7	58.1	2	40	-21.7	56.4	-5.9	1959.7	68.8	2	40	-5.9	56.4	-21.7
BT1415SWRLCP09SMPU	2014	46	Khanty	12540	49	23	80	3.2	55	M	8	19	2019.8	1678.2	113.1	209.5	4	24	-15	5.6	63.2	45.8	-4.7	2000.8	109.9	-15	5.6	-4.7	45.8	63.2
BT1415SWRLCP09SMPU	2014	46	Khanty	12540	49	23	80	3.2	55	M	9	53	2028.4	1647.7	115.4	212.3	15	224.5	19	-24.9	65.5	49.8	-5.9	1975.4	84.5	19	-24.9	-5.9	49.8	65.5
BT1415SWRLCP09SMPU	2014	46	Khanty	12540	49	23	80	3.2	55	M	10	69	2030.9	1648.9	113.3	199.7	18	181.6	35	-23.7	63.4	33.9	-2.6	1961.9	71	35	-23.7	-2.6	33.9	63.4
BT1415SWRLCP09SMPU	2014	46	Khanty	12540	49	23	80	3.2	55	M	11	45	2031.8	1692.2	94.2	200.4	8	70.8	11	19.6	44.3	37.7	-5.7	1986.8	95.9	11	19.6	-5.7	37.7	44.3
BT1415SWRLCP09SMPU	2014	46	Khanty	12540	49	23	80	3.2	55	M	11	113	2031.8	1678	51.1	189.7	50	313.1	79	5.4	1.2	23.1	-1.8	1918.8	27.9	79	5.4	-1.8	23.1	1.2
BT1415SWRLCP09SMPU	2014	46	Khanty	12540	49	23	80	3.2	55	M	13	71	2033.4	1660.9	96.2	205.3	19	106	37	-11.7	46.3	30.5	6.4	1962.4	71.5	37	-11.7	6.4	30.5	46.3
BT1415SWRLCP09SMPU	2014	46	Khanty	12540	49	23	80	3.2	55	M	14	120	2033.7	1657.8	47.5	208.4	57	278.4	86	-14.8	-2.4	46.6	-6.6	1913.7	22.8	86	-14.8	-6.6	46.6	-2.4
BT1415SWRLCP09SMPU	2014	46	Khanty	12540	49	23	80	3.2	55	M	15	76	2034.8	1672.8	94.3	191.7	25	157.3	42	0.2	44.4	24.5	-1.2	1958.8	67.9	42	0.2	-1.2	24.5	44.4
BT1415SWRLCP09SMPU	2014	46	Khanty	12540	49	23	80	3.2	55	M	16	90	2036.4	1659.6	94.9	191.9	36	212.9	56	-13	45	24	-0.5	1946.4	55.5	56	-13	-0.5	24	45
BT1415SWRLCP09SMPU	2014	46	Khanty	12540	49	23	80	3.2	55	M	17	74	2041.6	1688.4	98.3	180.9	21	171.2	40	15.8	48.4	8.7	3.8	1967.6	76.7	40	15.8	3.8	8.7	48.4
BT1415SWRLCP09SMPU	2014	46	Khanty	12540	49	23	80	3.2	55	M	18	75	2048.7	1677.5	95.8	200.4	23	124.7	41	4.9	45.9	39.1	-7.1	1973.7	82.8	41	4.9	-7.1	39.1	45.9
BT1415SWRLCP09SMPU	2014	46	Khanty	12540	49	23	80	3.2	55	M	19	74	2049.6	1643.4	140.4	191.8	22	116.7	40	-29.2	90.5	23.2	0.2	1975.6	84.7	40	-29.2	0.2	23.2	90.5
BT1415SWRLCP09SMPU	2014	46	Khanty	12540	49	23	80	3.2	55	M	20	50	2055	1713.6	95.8	195.6	12	49.2	16	41	45.9	31.7	-4.5	2005	114.1	16	41	-4.5	31.7	45.9
BT1415SWRLCP09SMPU	2014	46	Khanty	12540	49	23	80	3.2	55	M	21	96	2056.8	1661.7	117.9	181.2	40	226.3	62	-10.9	68	7.4	5.4	1960.8	69.9	62	-10.9	5.4	7.4	68
BT1415SWRLCP09SMPU	2014	46	Khanty	12540	49	23	80	3.2	55	M	22	114	2058.7	1724.2	51.9	168.6	51	106.9	80	51.6	2	-4.9	5.1	1944.7	53.8	80	51.6	5.1	-4.9	2
BT1415SWRLCP09SMPU	2014	46	Khanty	12540	49	23	80	3.2	55	M	23	84	2066.3	1734.2	52.2	195.9	30	254.2	50	61.6	2.3	20.3	7.2	1982.3	91.4	50	61.6	7.2	20.3	2.3
BT1415SWRLCP09SMPU	2014	46	Khanty	12540	49	23	80	3.2	55	M	25	77	2069	1673	121.6	197.4	26	109.9	43	0.4	71.7	33.8	-4.8	1992	101.1	43	0.4	-4.8	33.8	71.7
BT1415SWRLCP09SMPU	2014	46	Khanty	12540	49	23	80	3.2	55	M	26	84	2070	1727.7	74.2	184.1	31	141.4	50	55.1	24.3	15.3	0.4	1986	95.1	50	55.1	0.4	15.3	24.3
BT1415SWRLCP09SMPU	2014	46	Khanty	12540	49	23	80	3.2	55	M	27	46	2071.3	1710.8	144.2	170.3	9	106.9	12	38.2	94.3	7	-5.1	2025.3	134.4	12	38.2	-5.1	7	94.3
BT1415SWRLCP09SMPU	2014	46	Khanty	12540	49	23	80	3.2	55	M	28	109	2076	1651.1	119.3	196.6	44	160.4	75	-21.5	69.4	31.6	-3.4	1967	76.1	75	-21.5	-3.4	31.6	69.4
BT1415SWRLCP09SMPU	2014	46	Khanty	12540	49	23	80	3.2	55	M	29	76	2082.2	1732.9	101.4	171.9	24	123.8	42	60.3	51.5	6.3	-2.8	2006.2	115.3	42	60.3	-2.8	6.3	51.5
BT1415SWRLCP09SMPU	2014	46	Khanty	12540	49	23	80	3.2	55	M	30	106	2085.3	1708.6	75.6	195.1	43	210.6	72	36	25.7	28.5	-1.8	1979.3	88.4	72	36	-1.8	28.5	25.7
BT1415SWRLCH__SMPU	2014	48	Kontiolahti	12990	37	22	76	3.1	87	M	12	118	1924.8	1586	49.2	171.6	46	266.2	88	-14.8	19.5	-19.4	3.6	1806.8	4.9	55	16.8	0.5	-15.2	2.8
BT1415SWRLCH__SMPU	2014	48	Kontiolahti	12990	37	22	76	3.1	87	M	22	36	1960.8	1581.7	156.9	186.2	6	0	6	-19.1	127.2	-3.5	2.3	1924.8	122.9	-27	12.5	-0.8	0.7	110.5
BT1415SWRLCH__SMPU	2014	48	Kontiolahti	12990	37	22	76	3.1	87	M	23	74	1964.7	1632.4	69.7	188.6	22	97	44	31.6	40	2.1	-0.9	1890.7	88.8	11	63.2	-4	6.3	23.3
BT1415SWRLCH__SMPU	2014	48	Kontiolahti	12990	37	22	76	3.1	87	M	28	47	1998.1	1577.9	174.1	199.1	10	66.7	17	-22.9	144.4	10.1	1.6	1951.1	149.2	-16	8.7	-1.5	14.3	127.7
BT1415SWRLCH__SMPU	2014	48	Kontiolahti	12990	37	22	76	3.1	87	M	30	79	2012.1	1581.6	151.2	200.3	24	180.7	49	-19.2	121.5	16.1	-3.2	1933.1	131.2	16	12.4	-6.3	20.3	104.8
BT1415SWRLCH__SMPU	2014	48	Kontiolahti	12990	37	22	76	3.1	87	M	1	30	1847.9	1600.8	29.7	187.4	5	68.6	0	0	0	0	0	1817.9	16	-33	31.6	-3.1	4.2	-16.7
BT1415SWRLCH__SMPU	2014	48	Kontiolahti	12990	37	22	76	3.1	87	M	2	63	1864.9	1569.2	46.4	186.3	18	182.6	33	-31.6	16.7	-4.2	3.1	1801.9	0	0	0	0	0	0
BT1415SWRLCH__SMPU	2014	48	Kontiolahti	12990	37	22	76	3.1	87	M	3	25	1866.6	1590.1	52.8	198.7	3	87.7	-5	-10.7	23.1	7.5	3.8	1841.6	39.7	-38	20.9	0.7	11.7	6.4
BT1415SWRLCH__SMPU	2014	48	Kontiolahti	12990	37	22	76	3.1	87	M	4	36	1868.3	1570.9	47.6	213.8	7	112.9	6	-29.9	17.9	21.8	4.6	1832.3	30.4	-27	1.7	1.5	26	1.2
BT1415SWRLCH__SMPU	2014	48	Kontiolahti	12990	37	22	76	3.1	87	M	5	69	1891.8	1573.7	68.7	180.4	19	17	39	-27.1	39	-10.2	3.2	1822.8	20.9	6	4.5	0.1	-6	22.3
BT1415SWRLCH__SMPU	2014	48	Kontiolahti	12990	37	22	76	3.1	87	M	6	40	1893.8	1588.6	70.2	195	8	20.4	10	-12.2	40.5	2.1	5.5	1853.8	51.9	-23	19.4	2.4	6.3	23.8
BT1415SWRLCH__SMPU	2014	48	Kontiolahti	12990	37	22	76	3.1	87	M	7	50	1909.9	1579.7	88.9	191.3	12	101.9	20	-21.1	59.2	2.7	1.2	1859.9	58	-13	10.5	-1.9	6.9	42.5
BT1415SWRLCH__SMPU	2014	48	Kontiolahti	12990	37	22	76	3.1	87	M	8	55	1912.4	1560	87.9	209.5	14	174.7	25	-40.8	58.2	19.3	2.8	1857.4	55.5	-8	-9.2	-0.3	23.5	41.5
BT1415SWRLCH__SMPU	2014	48	Kontiolahti	12990	37	22	76	3.1	87	M	9	44	1914.6	1584.9	70.1	215.6	9	45.9	14	-15.9	40.4	28.9	-0.7	1870.6	68.7	-19	15.7	-3.8	33.1	23.7
BT1415SWRLCH__SMPU	2014	48	Kontiolahti	12990	37	22	76	3.1	87	M	10	30	1916.5	1611.7	95.6	179.2	4	18.7	0	10.9	65.9	-8.4	0.2	1886.5	84.6	-33	42.5	-2.9	-4.2	49.2
BT1415SWRLCH__SMPU	2014	48	Kontiolahti	12990	37	22	76	3.1	87	M	11	85	1920.3	1587.8	48.1	199.4	26	109.8	55	-13	18.4	11.7	0.3	1835.3	33.4	22	18.6	-2.8	15.9	1.7
BT1415SWRLCH__SMPU	2014	48	Kontiolahti	12990	37	22	76	3.1	87	M	13	12	1935.6	1589.9	133.7	200	2	164.3	-18	-10.9	104	8.5	4.1	1923.6	121.7	-51	20.7	1	12.7	87.3
BT1415SWRLCH__SMPU	2014	48	Kontiolahti	12990	37	22	76	3.1	87	M	14	91	1940.3	1563.6	92.1	193.6	30	264.1	61	-37.2	62.4	4.5	1.7	1849.3	47.4	28	-5.6	-1.4	8.7	45.7
BT1415SWRLCH__SMPU	2014	48	Kontiolahti	12990	37	22	76	3.1	87	M	15	107	1943.8	1564	73.4	199.4	39	247.6	77	-36.8	43.7	9	3	1836.8	34.9	44	-5.2	-0.1	13.2	27
BT1415SWRLCH__SMPU	2014	48	Kontiolahti	12990	37	22	76	3.1	87	M	16	74	1944.9	1613.9	47.4	209.6	21	116.8	44	13.1	17.7	18.6	3.6	1870.9	69	11	44.7	0.5	22.8	1
BT1415SWRLCH__SMPU	2014	48	Kontiolahti	12990	37	22	76	3.1	87	M	17	60	1945.6	1578.4	92.1	215.1	16	108.1	30	-22.4	62.4	26.5	1.2	1885.6	83.7	-3	9.2	-1.9	30.7	45.7
BT1415SWRLCH__SMPU	2014	48	Kontiolahti	12990	37	22	76	3.1	87	M	18	50	1949.8	1606.9	91.2	201.7	11	150.2	20	6.1	61.5	9.9	4.4	1899.8	97.9	-13	37.7	1.3	14.1	44.8
BT1415SWRLCH__SMPU	2014	48	Kontiolahti	12990	37	22	76	3.1	87	M	19	101	1952.8	1561.1	93	197.7	36	163.6	71	-39.7	63.3	5.3	5	1851.8	49.9	38	-8.1	1.9	9.5	46.6
BT1415SWRLCH__SMPU	2014	48	Kontiolahti	12990	37	22	76	3.1	87	M	20	60	1956	1586.7	111.8	197.5	15	64.5	30	-14.1	82.1	7.9	2.2	1896	94.1	-3	17.5	-0.9	12.1	65.4
BT1415SWRLCH__SMPU	2014	48	Kontiolahti	12990	37	22	76	3.1	87	M	21	81	1957.7	1596.2	92.7	187.8	25	164.2	51	-4.6	63	-2.4	2.8	1876.7	74.8	18	27	-0.3	1.8	46.3
BT1415SWRLCH__SMPU	2014	48	Kontiolahti	12990	37	22	76	3.1	87	M	24	73	1964.7	1586.7	89.9	215.1	20	43.9	43	-14.1	60.2	24.5	3.2	1891.7	89.8	10	17.5	0.1	28.7	43.5
BT1415SWRLCH__SMPU	2014	48	Kontiolahti	12990	37	22	76	3.1	87	M	25	108	1982.2	1562	113.2	199	42	139.7	78	-38.8	83.5	6.4	5.2	1874.2	72.3	45	-7.2	2.1	10.6	66.8
BT1415SWRLCH__SMPU	2014	48	Kontiolahti	12990	37	22	76	3.1	87	M	26	108	1987.6	1590	92.6	197	41	221.1	78	-10.8	62.9	3.6	6	1879.6	77.7	45	20.8	2.9	7.8	46.2
BT1415SWRLCH__SMPU	2014	48	Kontiolahti	12990	37	22	76	3.1	87	M	27	92	1989.4	1597.9	93.3	206.2	31	92.4	62	-2.9	63.6	18.3	0.5	1897.4	95.5	29	28.7	-2.6	22.5	46.9
BT1415SWRLCH__SMPU	2014	48	Kontiolahti	12990	37	22	76	3.1	87	M	29	98	2011.5	1610.7	96.2	206.6	35	258.8	68	9.9	66.5	13.2	6	1913.5	111.6	35	41.5	2.9	17.4	49.8
BT1314SWRLCP02SMPU	2013	50	Hochfilzen	12750	17	16	65	1	74	M	13	49	2022.9	1745.3	25.1	203.5	10	77	35	42.6	-26.8	6	2.8	1973.9	55.8	-16	45.4	0.2	9	1.2
BT1314SWRLCP02SMPU	2013	50	Hochfilzen	12750	17	16	65	1	74	M	24	31	2066.2	1748.5	72.8	213.9	6	35.2	17	45.8	20.9	10	9.2	2035.2	117.1	-34	48.6	6.6	13	48.9
BT1314SWRLCP02SMPU	2013	50	Hochfilzen	12750	17	16	65	1	74	M	1	14	1963.3	1702.7	51.9	194.7	2	72.8	0	0	0	0	0	1949.3	31.2	-51	2.8	-2.6	3	28
BT1314SWRLCP02SMPU	2013	50	Hochfilzen	12750	17	16	65	1	74	M	2	40	1971	1675.7	48.5	206.8	7	102.9	26	-27	-3.4	3	9.1	1931	12.9	-25	-24.2	6.5	6	24.6
BT1314SWRLCP02SMPU	2013	50	Hochfilzen	12750	17	16	65	1	74	M	3	17	1980.9	1699.4	68.6	195.9	4	21.2	3	-3.3	16.7	-4	5.2	1963.9	45.8	-48	-0.5	2.6	-1	44.7
BT1314SWRLCP02SMPU	2013	50	Hochfilzen	12750	17	16	65	1	74	M	4	65	1983.1	1699.9	23.9	194.3	17	112.3	51	-2.8	-28	-3	2.6	1918.1	0	0	0	0	0	0
BT1314SWRLCP02SMPU	2013	50	Hochfilzen	12750	17	16	65	1	74	M	5	15	1984.5	1690.6	90.8	188.1	3	0	1	-12.1	38.9	-7	0.4	1969.5	51.4	-50	-9.3	-2.2	-4	66.9
BT1314SWRLCP02SMPU	2013	50	Hochfilzen	12750	17	16	65	1	74	M	6	42	1992.2	1698.7	47.7	203.8	8	7.7	28	-4	-4.2	4	5.1	1950.2	32.1	-23	-1.2	2.5	7	23.8
BT1314SWRLCP02SMPU	2013	50	Hochfilzen	12750	17	16	65	1	74	M	7	31	1998.5	1733	27.5	207	5	17.6	17	30.3	-24.4	6	6.3	1967.5	49.4	-34	33.1	3.7	9	3.6
BT1314SWRLCP02SMPU	2013	50	Hochfilzen	12750	17	16	65	1	74	M	8	86	2007.7	1687.4	44.8	189.5	28	165.7	72	-15.3	-7.1	-6	0.8	1921.7	3.6	21	-12.5	-1.8	-3	20.9
BT1314SWRLCP02SMPU	2013	50	Hochfilzen	12750	17	16	65	1	74	M	9	85	2008.2	1664.8	43.5	214.9	26	111.7	71	-37.9	-8.4	22	-1.8	1923.2	5.1	20	-35.1	-4.4	25	19.6
BT1314SWRLCP02SMPU	2013	50	Hochfilzen	12750	17	16	65	1	74	M	10	75	2009	1690.8	43.7	199.5	20	130.8	61	-11.9	-8.2	4	0.8	1934	15.9	10	-9.1	-1.8	7	19.8
BT1314SWRLCP02SMPU	2013	50	Hochfilzen	12750	17	16	65	1	74	M	11	50	2009.8	1693.3	65.9	200.6	11	59.6	36	-9.4	14	9	-3.1	1959.8	41.7	-15	-6.6	-5.7	12	42
BT1314SWRLCP02SMPU	2013	50	Hochfilzen	12750	17	16	65	1	74	M	12	59	2015.1	1688.8	64.2	203.1	15	75.9	45	-13.9	12.3	11	-2.6	1956.1	38	-6	-11.1	-5.2	14	40.3
BT1415SWRLCH__SWPU	2013	50	Hochfilzen	12750	17	16	65	1	74	M	14	0	2036.1	1694	141.7	200.4	1	295.9	-14	-8.7	89.8	7	-1.3	2036.1	118	-65	-5.9	-3.9	10	117.8
BT1314SWRLCP02SMPU	2013	50	Hochfilzen	12750	17	16	65	1	74	M	15	102	2036.9	1697.1	48.1	189.7	33	152.7	88	-5.6	-3.8	-4	-1	1934.9	16.8	37	-2.8	-3.6	-1	24.2
BT1314SWRLCP02SMPU	2013	50	Hochfilzen	12750	17	16	65	1	74	M	16	79	2039	1684.8	83.2	192	22	111.5	65	-17.9	31.3	0	-2.7	1960	41.9	14	-15.1	-5.3	3	59.3
BT1314SWRLCP02SMPU	2013	50	Hochfilzen	12750	17	16	65	1	74	M	17	56	2039.2	1715.4	67.9	199.9	14	128.1	42	12.7	16	4	1.2	1983.2	65.1	-9	15.5	-1.4	7	44
BT1314SWRLCP02SMPU	2013	50	Hochfilzen	12750	17	16	65	1	74	M	18	48	2040.3	1721.8	67.4	203.1	9	28.9	34	19.1	15.5	9	-0.6	1992.3	74.2	-17	21.9	-3.2	12	43.5
BT1314SWRLCP02SMPU	2013	50	Hochfilzen	12750	17	16	65	1	74	M	19	102	2051.4	1715.5	49.2	184.7	34	73.6	88	12.8	-2.7	-9	-1	1949.4	31.3	37	15.6	-3.6	-6	25.3
BT1314SWRLCP02SMPU	2013	50	Hochfilzen	12750	17	16	65	1	74	M	20	50	2055.2	1696.1	107.6	201.5	12	46.5	36	-6.6	55.7	10	-3.2	2005.2	87.1	-15	-3.8	-5.8	13	83.7
BT1314SWRLCP02SMPU	2013	50	Hochfilzen	12750	17	16	65	1	74	M	21	83	2055.6	1705	67.5	200.1	24	131.8	69	2.3	15.6	4	1.4	1972.6	54.5	18	5.1	-1.2	7	43.6
BT1314SWRLCP02SMPU	2013	50	Hochfilzen	12750	17	16	65	1	74	M	22	105	2056.8	1685.7	66.2	199.9	36	172.8	91	-17	14.3	7	-1.8	1951.8	33.7	40	-14.2	-4.4	10	42.3
BT1314SWRLCP02SMPU	2013	50	Hochfilzen	12750	17	16	65	1	74	M	23	72	2063.3	1724.2	90.1	177	18	19.8	58	21.5	38.2	-18	0.3	1991.3	73.2	7	24.3	-2.3	-15	66.2
BT1314SWRLCP02SMPU	2013	50	Hochfilzen	12750	17	16	65	1	74	M	25	90	2071.7	1709.4	86.3	186	29	44.4	76	6.7	34.4	-5	-3.7	1981.7	63.6	25	9.5	-6.3	-2	62.4
BT1314SWRLCP02SMPU	2013	50	Hochfilzen	12750	17	16	65	1	74	M	26	149	2073.1	1675.2	48.2	200.7	60	270.9	135	-27.5	-3.7	3	3	1924.1	6	84	-24.7	0.4	6	24.3
BT1314SWRLCP02SMPU	2013	50	Hochfilzen	12750	17	16	65	1	74	M	27	131	2073.6	1708.5	47.4	186.7	48	239.5	117	5.8	-4.5	-8	0	1942.6	24.5	66	8.6	-2.6	-5	23.5
BT1314SWRLCP02SMPU	2013	50	Hochfilzen	12750	17	16	65	1	74	M	28	79	2074.8	1701.8	109.4	184.6	21	45.7	65	-0.9	57.5	-10	-0.1	1995.8	77.7	14	1.9	-2.7	-7	85.5
BT1314SWRLCP02SMPU	2013	50	Hochfilzen	12750	17	16	65	1	74	M	29	85	2075	1692.2	89.5	208.3	25	92.3	71	-10.5	37.6	20	-6.4	1990	71.9	20	-7.7	-9	23	65.6
BT1314SWRLCP02SMPU	2013	50	Hochfilzen	12750	17	16	65	1	74	M	30	62	2075.6	1707.7	111.1	194.8	16	51.8	48	5	59.2	-1	1.1	2013.6	95.5	-3	7.8	-1.5	2	87.2
BT1314SWRLCP03SMPU	2013	52	Annecy	13025	38	20	78	2.4	59	M	6	76	1959.4	1644.9	36.6	201.9	22	70.5	76	-50.1	-5.7	31	4.5	1883.4	20	-6	-3.5	-0.9	24	0.4
BT1314SWRLCP03SMPU	2013	52	Annecy	13025	38	20	78	2.4	59	M	12	76	1974.2	1683.6	55.5	159.1	21	128.9	76	-11.4	13.2	-14	6.7	1898.2	34.8	-6	35.2	1.3	-21	19.3
BT1314SWRLCP02SWPU	2013	52	Annecy	13025	38	20	78	2.4	59	M	1	0	1903.7	1695	42.3	166.4	1	270.9	0	0	0	0	0	1903.7	40.3	-82	46.6	-5.4	-7	6.1
BT1314SWRLCP03SMPU	2013	52	Annecy	13025	38	20	78	2.4	59	M	2	48	1941.2	1696.5	19.5	177.2	9	84	48	1.5	-22.8	6	4.8	1893.2	29.8	-34	48.1	-0.6	-1	-16.7
BT1314SWRLCP03SMPU	2013	52	Annecy	13025	38	20	78	2.4	59	M	3	49	1942.8	1680.3	39.2	174.3	10	37.5	49	-14.7	-3.1	3	4.9	1893.8	30.4	-33	31.9	-0.5	-4	3
BT1314SWRLCP03SMPU	2013	52	Annecy	13025	38	20	78	2.4	59	M	4	82	1945.4	1648.4	36.2	178.8	27	167.2	82	-46.6	-6.1	7	5.4	1863.4	0	0	0	0	0	0
BT1314SWRLCP03SMPU	2013	52	Annecy	13025	38	20	78	2.4	59	M	5	52	1950.2	1667.8	57	173.4	11	39.1	52	-27.2	14.7	2	5	1898.2	34.8	-30	19.4	-0.4	-5	20.8
BT1314SWRLCP03SMPU	2013	52	Annecy	13025	38	20	78	2.4	59	M	7	68	1961.2	1670.6	55.5	167.1	16	109.2	68	-24.4	13.2	-8	8.7	1893.2	29.8	-14	22.2	3.3	-15	19.3
BT1314SWRLCP03SMPU	2013	52	Annecy	13025	38	20	78	2.4	59	M	8	77	1961.8	1674.9	37.8	172.1	23	55.7	77	-20.1	-4.5	1	4.7	1884.8	21.4	-5	26.5	-0.7	-6	1.6
BT1314SWRLCP03SMPU	2013	52	Annecy	13025	38	20	78	2.4	59	M	9	43	1961.8	1670.3	75	173.5	7	61.6	43	-24.7	32.7	7	0.1	1918.8	55.4	-39	21.9	-5.3	0	38.8
BT1314SWRLCP03SMPU	2013	52	Annecy	13025	38	20	78	2.4	59	M	10	42	1965.3	1690.2	57.9	175.2	6	85.9	42	-4.8	15.6	5	3.8	1923.3	59.9	-40	41.8	-1.6	-2	21.7
BT1314SWRLCP03SMPU	2013	52	Annecy	13025	38	20	78	2.4	59	M	11	33	1969.6	1694.1	56.3	186.2	2	0	33	-0.9	14	12	7.8	1936.6	73.2	-49	45.7	2.4	5	20.1
BT1314SWRLCP03SMPU	2013	52	Annecy	13025	38	20	78	2.4	59	M	13	40	1974.5	1685.8	58.2	190.5	4	83.6	40	-9.2	15.9	18	6.1	1934.5	71.1	-42	37.4	0.7	11	22
BT1314SWRLCP03SMPU	2013	52	Annecy	13025	38	20	78	2.4	59	M	14	101	1974.7	1675.1	16.2	182.4	35	264.8	101	-19.9	-26.1	15	1	1873.7	10.3	19	26.7	-4.4	8	-20
BT1314SWRLCP03SMPU	2013	52	Annecy	13025	38	20	78	2.4	59	M	15	82	1975.3	1655.2	56.1	182	28	41.7	82	-39.8	13.8	11	4.6	1893.3	29.9	0	6.8	-0.8	4	19.9
BT1314SWRLCP03SMPU	2013	52	Annecy	13025	38	20	78	2.4	59	M	16	37	1987.3	1690.3	79	181	3	65.9	37	-4.7	36.7	10	4.6	1950.3	86.9	-45	41.9	-0.8	3	42.8
BT1314SWRLCP03SMPU	2013	52	Annecy	13025	38	20	78	2.4	59	M	17	47	1987.7	1679	77.2	184.5	8	58.1	47	-16	34.9	16	2.1	1940.7	77.3	-35	30.6	-3.3	9	41
BT1314SWRLCP03SMPU	2013	52	Annecy	13025	38	20	78	2.4	59	M	18	41	1989.6	1708.5	58.3	181.8	5	70.8	41	13.5	16	12	3.4	1948.6	85.2	-41	60.1	-2	5	22.1
BT1314SWRLCP03SMPU	2013	52	Annecy	13025	38	20	78	2.4	59	M	19	83	1991.9	1685.2	39.1	184.6	29	71.6	83	-9.8	-3.2	11	7.2	1908.9	45.5	1	36.8	1.8	4	2.9
BT1314SWRLCP03SMPU	2013	52	Annecy	13025	38	20	78	2.4	59	M	20	54	1994.2	1656.7	97.7	185.8	12	46.5	54	-38.3	55.4	16	3.4	1940.2	76.8	-28	8.3	-2	9	61.5
BT1314SWRLCP03SMPU	2013	52	Annecy	13025	38	20	78	2.4	59	M	21	55	1994.5	1681.8	78.8	178.9	14	119.5	55	-13.2	36.5	6	6.5	1939.5	76.1	-27	33.4	1.1	-1	42.6
BT1314SWRLCP03SMPU	2013	52	Annecy	13025	38	20	78	2.4	59	M	22	79	2002.9	1717.4	37.6	168.9	25	203.5	79	22.4	-4.7	-5	7.5	1923.9	60.5	-3	69	2.1	-12	1.4
BT1314SWRLCP03SMPU	2013	52	Annecy	13025	38	20	78	2.4	59	M	23	71	2007	1697	56.2	182.8	19	519.8	71	2	13.9	9	7.4	1936	72.6	-11	48.6	2	2	20
BT1314SWRLCP03SMPU	2013	52	Annecy	13025	38	20	78	2.4	59	M	24	60	2012.9	1667.4	95.1	190.4	15	90.8	60	-27.6	52.8	20	4	1952.9	89.5	-22	19	-1.4	13	58.9
BT1314SWRLCP03SMPU	2013	52	Annecy	13025	38	20	78	2.4	59	M	25	86	2016	1678.5	55.7	195.8	30	88.2	86	-16.5	13.4	24	5.4	1930	66.6	4	30.1	0	17	19.5
BT1314SWRLCP03SMPU	2013	52	Annecy	13025	38	20	78	2.4	59	M	26	113	2017.5	1712.4	18.3	173.8	42	273.9	113	17.4	-24	6	1.4	1904.5	41.1	31	64	-4	-1	-17.9
BT1314SWRLCP03SMPU	2013	52	Annecy	13025	38	20	78	2.4	59	M	27	117	2023	1685.8	38.5	181.7	48	243.8	117	-9.2	-3.8	11	4.3	1906	42.6	35	37.4	-1.1	4	2.3
BT1314SWRLCP03SMPU	2013	52	Annecy	13025	38	20	78	2.4	59	M	28	54	2023.2	1689	98.3	181.9	13	90.5	54	-6	56	8	7.5	1969.2	105.8	-28	40.6	2.1	1	62.1
BT1314SWRLCP03SMPU	2013	52	Annecy	13025	38	20	78	2.4	59	M	29	73	2032.6	1675.7	100.9	183	20	103.3	73	-19.3	58.6	13	3.6	1959.6	96.2	-9	27.3	-1.8	6	64.7
BT1314SWRLCP03SMPU	2013	52	Annecy	13025	38	20	78	2.4	59	M	30	92	2033	1669.8	74.8	196.4	33	560.3	92	-25.2	32.5	30	0	1941	77.6	10	21.4	-5.4	23	38.6
BT1314SWRLCP04SMPU	2013	54	Oberhof	12800	49	36	82	3.6	69	M	17	82	2218.5	1844.4	81.8	210.3	21	127.8	82	5.6	42.6	39	-38.4	2136.5	71.7	-13	6	-29.6	29	66.3
BT1314SWRLCP04SMPU	2013	54	Oberhof	12800	49	36	82	3.6	69	M	19	120	2221.1	1864.2	38.4	198.5	40	485.5	120	25.4	-0.8	21	-32.2	2101.1	36.3	25	25.8	-23.4	11	22.9
BT1314SWRLCP04SMPU	2013	54	Oberhof	12800	49	36	82	3.6	69	M	22	94	2232.2	1869.1	59.7	209.4	26	127.1	94	30.3	20.5	38	-38.3	2138.2	73.4	-1	30.7	-29.5	28	44.2
BT1314SWRLCP03SWPU	2013	54	Oberhof	12800	49	36	82	3.6	69	M	1	0	2087.7	1838.8	39.2	209.7	1	282	0	0	0	0	0	2087.7	22.9	-95	0.4	8.8	-10	23.7
BT1314SWRLCP04SMPU	2013	54	Oberhof	12800	49	36	82	3.6	69	M	2	0	2123.3	1852.5	60.2	210.6	2	0	0	13.7	21	11	-10.1	2123.3	58.5	-95	14.1	-1.3	1	44.7
BT1314SWRLCP04SMPU	2013	54	Oberhof	12800	49	36	82	3.6	69	M	3	22	2147.7	1846	62.4	217.3	3	35.6	22	7.2	23.2	11	-3.4	2125.7	60.9	-73	7.6	5.4	1	46.9
BT1314SWRLCP04SMPU	2013	54	Oberhof	12800	49	36	82	3.6	69	M	4	95	2159.8	1838.4	15.5	210.9	28	177.8	95	-0.4	-23.7	10	-8.8	2064.8	0	0	0	0	0	0
BT1314SWRLCP04SMPU	2013	54	Oberhof	12800	49	36	82	3.6	69	M	5	63	2171	1885.2	15.5	207.3	12	99.2	63	46.4	-23.7	10	-12.4	2108	43.2	-32	46.8	-3.6	0	0
BT1314SWRLCP04SMPU	2013	54	Oberhof	12800	49	36	82	3.6	69	M	6	50	2176.3	1837.4	104.1	184.8	10	101.7	50	-1.4	64.9	-18	-6.9	2126.3	61.5	-45	-1	1.9	-28	88.6
BT1314SWRLCP04SMPU	2013	54	Oberhof	12800	49	36	82	3.6	69	M	7	63	2184.5	1868.7	59.1	193.7	13	83.3	63	29.9	19.9	-17	1	2121.5	56.7	-32	30.3	9.8	-27	43.6
BT1314SWRLCP04SMPU	2013	54	Oberhof	12800	49	36	82	3.6	69	M	8	56	2186.9	1895.8	39.3	195.8	11	88.6	56	57	0.1	-4	-9.9	2130.9	66.1	-39	57.4	-1.1	-14	23.8
BT1314SWRLCP04SMPU	2013	54	Oberhof	12800	49	36	82	3.6	69	M	9	49	2189.4	1875.8	61.7	202.9	9	110.4	49	37	22.5	1	-7.8	2140.4	75.6	-46	37.4	1	-9	46.2
BT1314SWRLCP04SMPU	2013	54	Oberhof	12800	49	36	82	3.6	69	M	10	27	2192.6	1865.5	86.2	213.9	4	60	27	26.7	47	16	-11.8	2165.6	100.8	-68	27.1	-3	6	70.7
BT1314SWRLCP04SMPU	2013	54	Oberhof	12800	49	36	82	3.6	69	M	11	77	2195.3	1853	60.7	204.6	18	235.4	77	14.2	21.5	0	-5.1	2118.3	53.5	-18	14.6	3.7	-10	45.2
BT1314SWRLCP04SMPU	2013	54	Oberhof	12800	49	36	82	3.6	69	M	12	43	2198.1	1862.2	84.9	208	8	131	43	23.4	45.7	3	-4.7	2155.1	90.3	-52	23.8	4.1	-7	69.4
BT1314SWRLCP04SMPU	2013	54	Oberhof	12800	49	36	82	3.6	69	M	13	100	2208.3	1849.8	59.9	198.6	32	225.5	100	11	20.7	-8	-3.1	2108.3	43.5	5	11.4	5.7	-18	44.4
BT1314SWRLCP04SMPU	2013	54	Oberhof	12800	49	36	82	3.6	69	M	14	96	2214.5	1838.4	79.1	201	29	72.1	96	-0.4	39.9	5	-13.7	2118.5	53.7	1	0	-4.9	-5	63.6
BT1314SWRLCP04SMPU	2013	54	Oberhof	12800	49	36	82	3.6	69	M	15	94	2214.8	1834.3	81	205.5	25	136.5	94	-4.5	41.8	1	-5.2	2120.8	56	-1	-4.1	3.6	-9	65.5
BT1314SWRLCP04SMPU	2013	54	Oberhof	12800	49	36	82	3.6	69	M	16	80	2215.5	1864.2	82.9	188.4	20	107.6	80	25.4	43.7	-11	-10.3	2135.5	70.7	-15	25.8	-1.5	-21	67.4
BT1314SWRLCP04SMPU	2013	54	Oberhof	12800	49	36	82	3.6	69	M	18	39	2218.7	1899.8	87.1	192.8	7	254.3	39	61	47.9	-15	-1.9	2179.7	114.9	-56	61.4	6.9	-25	71.6
BT1314SWRLCP04SMPU	2013	54	Oberhof	12800	49	36	82	3.6	69	M	20	86	2224.2	1926.8	16.1	195.3	24	310.8	86	88	-23.1	-9	-5.4	2138.2	73.4	-9	88.4	3.4	-19	0.6
BT1314SWRLCP04SMPU	2013	54	Oberhof	12800	49	36	82	3.6	69	M	21	101	2225.4	1864.9	63.5	196	34	120.6	101	26.1	24.3	-6	-7.7	2124.4	59.6	6	26.5	1.1	-16	48
BT1314SWRLCP04SMPU	2013	54	Oberhof	12800	49	36	82	3.6	69	M	23	64	2249.8	1900.5	103.5	181.8	14	96.8	64	61.7	64.3	-24	-3.9	2185.8	121	-31	62.1	4.9	-34	88
BT1314SWRLCP04SMPU	2013	54	Oberhof	12800	49	36	82	3.6	69	M	24	82	2251.3	1857	125.2	187.1	22	130.8	82	18.2	86	-9	-13.6	2169.3	104.5	-13	18.6	-4.8	-19	109.7
BT1314SWRLCP04SMPU	2013	54	Oberhof	12800	49	36	82	3.6	69	M	25	96	2260.4	1881	60.2	223.2	30	126.8	96	42.2	21	16	-2.5	2164.4	99.6	1	42.6	6.3	6	44.7
BT1314SWRLCP04SMPU	2013	54	Oberhof	12800	49	36	82	3.6	69	M	26	94	2265.5	1927.4	39.6	204.5	27	144.5	94	88.6	0.4	4	-9.2	2171.5	106.7	-1	89	-0.4	-6	24.1
BT1314SWRLCP04SMPU	2013	54	Oberhof	12800	49	36	82	3.6	69	M	27	111	2269.3	1881.3	63.7	213.3	35	137.7	111	42.5	24.5	7	-3.4	2158.3	93.5	16	42.9	5.4	-3	48.2
BT1314SWRLCP04SMPU	2013	54	Oberhof	12800	49	36	82	3.6	69	M	28	129	2274.9	1842.5	105.8	197.6	44	258.9	129	3.7	66.6	-3	-9.1	2145.9	81.1	34	4.1	-0.3	-13	90.3
BT1314SWRLCP04SMPU	2013	54	Oberhof	12800	49	36	82	3.6	69	M	29	139	2276.4	1885	42.6	209.8	48	419.6	139	46.2	3.4	0	0.1	2137.4	72.6	44	46.6	8.9	-10	27.1
BT1314SWRLCP04SMPU	2013	54	Oberhof	12800	49	36	82	3.6	69	M	30	129	2278	1874.2	63.8	211	45	187.2	129	35.4	24.6	4	-2.7	2149	84.2	34	35.8	6.1	-6	48.3
BT1314SWRLCP05SMPU	2013	56	Ruhpolding	13125	28	18	84	3.9	84	M	17	32	2036.4	1671.8	150.5	182.1	8	27.2	32	-77.1	128.3	0	-5	2004.4	113.6	-66	-30.7	2.2	12	130.1
BT1314SWRLCP05SMPU	2013	56	Ruhpolding	13125	28	18	84	3.9	84	M	20	72	2039.3	1728.7	41.1	197.5	25	99	72	-20.2	18.9	25	-14.6	1967.3	76.5	-26	26.2	-7.4	37	20.7
BT1314SWRLCP04SWPU	2013	56	Ruhpolding	13125	28	18	84	3.9	84	M	1	0	1958.2	1748.9	22.2	187.1	1	565	0	0	0	0	0	1958.2	67.4	-98	46.4	7.2	12	1.8
BT1314SWRLCP05SMPU	2013	56	Ruhpolding	13125	28	18	84	3.9	84	M	2	17	1976.2	1757.3	22.1	179.8	4	59.5	17	8.4	-0.1	-4	-3.3	1959.2	68.4	-81	54.8	3.9	8	1.7
BT1314SWRLCP05SMPU	2013	56	Ruhpolding	13125	28	18	84	3.9	84	M	3	36	1979.6	1718	43	182.6	11	41.6	36	-30.9	20.8	1	-5.5	1943.6	52.8	-62	15.5	1.7	13	22.6
BT1314SWRLCP05SMPU	2013	56	Ruhpolding	13125	28	18	84	3.9	84	M	4	58	1983.7	1737	20.1	168.6	16	81.2	58	-11.9	-2.1	-14	-4.5	1925.7	34.9	-40	34.5	2.7	-2	-0.3
BT1314SWRLCP05SMPU	2013	56	Ruhpolding	13125	28	18	84	3.9	84	M	5	23	1985.4	1742.3	43.4	176.7	7	40	23	-6.6	21.2	-3	-7.4	1962.4	71.6	-75	39.8	-0.2	9	23
BT1314SWRLCP05SMPU	2013	56	Ruhpolding	13125	28	18	84	3.9	84	M	6	98	1988.8	1702.5	20.4	167.9	37	149.6	98	-46.4	-1.8	-12	-7.2	1890.8	0	0	0	0	0	0
BT1314SWRLCP05SMPU	2013	56	Ruhpolding	13125	28	18	84	3.9	84	M	7	21	1997.3	1739	65.5	171.8	5	18	21	-9.9	43.3	-12	-3.3	1976.3	85.5	-77	36.5	3.9	0	45.1
BT1314SWRLCP05SMPU	2013	56	Ruhpolding	13125	28	18	84	3.9	84	M	8	75	1997.5	1712.2	19.7	190.6	27	109.5	75	-36.7	-2.5	10	-6.5	1922.5	31.7	-23	9.7	0.7	22	-0.7
BT1314SWRLCP05SMPU	2013	56	Ruhpolding	13125	28	18	84	3.9	84	M	9	22	1998.2	1735.2	62.1	178.9	6	39.1	22	-13.7	39.9	-3	-5.2	1976.2	85.4	-76	32.7	2	9	41.7
BT1314SWRLCP05SMPU	2013	56	Ruhpolding	13125	28	18	84	3.9	84	M	10	47	1998.4	1731.4	41.8	178.2	13	112.8	47	-17.5	19.6	-6	-2.9	1951.4	60.6	-51	28.9	4.3	6	21.4
BT1314SWRLCP05SMPU	2013	56	Ruhpolding	13125	28	18	84	3.9	84	M	11	34	1999.6	1735.7	43.8	186.1	9	78.2	34	-13.2	21.6	11	-12	1965.6	74.8	-64	33.2	-4.8	23	23.4
BT1314SWRLCP05SMPU	2013	56	Ruhpolding	13125	28	18	84	3.9	84	M	12	35	1999.8	1739.1	42.7	183	10	41.4	35	-9.8	20.5	0	-4.1	1964.8	74	-63	36.6	3.1	12	22.3
BT1314SWRLCP05SMPU	2013	56	Ruhpolding	13125	28	18	84	3.9	84	M	13	8	2017.7	1758.9	68	182.8	3	76.4	8	10	45.8	4	-8.3	2009.7	118.9	-90	56.4	-1.1	16	47.6
BT1314SWRLCP05SMPU	2013	56	Ruhpolding	13125	28	18	84	3.9	84	M	14	78	2023.8	1701.9	62	181.9	29	234.1	78	-47	39.8	2	-7.2	1945.8	55	-20	-0.6	0	14	41.6
BT1314SWRLCP05SMPU	2013	56	Ruhpolding	13125	28	18	84	3.9	84	M	15	102	2032.5	1724	41.1	165.4	40	112	102	-24.9	18.9	-12	-9.7	1930.5	39.7	4	21.5	-2.5	0	20.7
BT1314SWRLCP05SMPU	2013	56	Ruhpolding	13125	28	18	84	3.9	84	M	16	7	2034.6	1792.7	67.9	167	2	0	7	43.8	45.7	-15	-5.1	2027.6	136.8	-91	90.2	2.1	-3	47.5
BT1314SWRLCP05SMPU	2013	56	Ruhpolding	13125	28	18	84	3.9	84	M	18	60	2038.4	1710.7	82.4	185.3	18	143.5	60	-38.2	60.2	3	-4.8	1978.4	87.6	-38	8.2	2.4	15	62
BT1314SWRLCP05SMPU	2013	56	Ruhpolding	13125	28	18	84	3.9	84	M	19	61	2038.7	1694.7	100.1	182.9	19	80.2	61	-54.2	77.9	1	-5.2	1977.7	86.9	-37	-7.8	2	13	79.7
BT1314SWRLCP05SMPU	2013	56	Ruhpolding	13125	28	18	84	3.9	84	M	21	55	2039.4	1716.9	83.4	184.1	15	85.3	55	-32	61.2	6	-9	1984.4	93.6	-43	14.4	-1.8	18	63
BT1314SWRLCP05SMPU	2013	56	Ruhpolding	13125	28	18	84	3.9	84	M	22	66	2040.8	1709.6	84.6	180.6	22	98.8	66	-39.3	62.4	4	-10.5	1974.8	84	-32	7.1	-3.3	16	64.2
BT1314SWRLCP05SMPU	2013	56	Ruhpolding	13125	28	18	84	3.9	84	M	23	99	2041	1699.4	63.4	179.2	38	30.6	99	-49.5	41.2	3	-10.9	1942	51.2	1	-3.1	-3.7	15	43
BT1314SWRLCP05SMPU	2013	56	Ruhpolding	13125	28	18	84	3.9	84	M	24	52	2043.5	1756.5	41.9	193.1	14	40.2	52	7.6	19.7	18	-12	1991.5	100.7	-46	54	-4.8	30	21.5
BT1314SWRLCP05SMPU	2013	56	Ruhpolding	13125	28	18	84	3.9	84	M	25	63	2057	1716.5	105.2	172.3	20	80.5	63	-32.4	83	-7	-7.8	1994	103.2	-35	14	-0.6	5	84.8
BT1314SWRLCP05SMPU	2013	56	Ruhpolding	13125	28	18	84	3.9	84	M	26	71	2057.2	1779.9	21.2	185.1	24	130.4	71	31	-1	5	-7	1986.2	95.4	-27	77.4	0.2	17	0.8
BT1314SWRLCP05SMPU	2013	56	Ruhpolding	13125	28	18	84	3.9	84	M	27	75	2067.7	1768.3	42.7	181.7	26	81.1	75	19.4	20.5	6	-11.4	1992.7	101.9	-23	65.8	-4.2	18	22.3
BT1314SWRLCP05SMPU	2013	56	Ruhpolding	13125	28	18	84	3.9	84	M	28	101	2070.2	1738.6	44.1	186.5	39	82.8	101	-10.3	21.9	8	-8.6	1969.2	78.4	3	36.1	-1.4	20	23.7
BT1314SWRLCP05SMPU	2013	56	Ruhpolding	13125	28	18	84	3.9	84	M	29	38	2071	1780	63	190	12	21.4	38	31.1	40.8	10	-7.1	2033	142.2	-60	77.5	0.1	22	42.6
BT1314SWRLCP05SMPU	2013	56	Ruhpolding	13125	28	18	84	3.9	84	M	30	68	2088.6	1751.9	83.3	185.4	23	82.6	68	3	61.1	8	-9.7	2020.6	129.8	-30	49.4	-2.5	20	62.9
BT1314SWRLCP06SMPU	2013	58	Anterselva	12845	26	11	71	2.3	86	M	30	72	1993.1	1672.3	109.6	139.2	21	8	72	52.4	29.3	-17	-24.2	1921.1	103.5	1	73.1	-22.5	-3	55.9
BT1314SWRLCP06SMPU	2013	58	Anterselva	12845	26	11	71	2.3	86	M	3	48	1885.4	1573.9	73.9	189.6	10	18.1	48	-46	-6.4	4	5.2	1837.4	19.8	-23	-25.3	6.9	18	20.2
BT1314SWRLCP06SMPU	2013	58	Anterselva	12845	26	11	71	2.3	86	M	7	41	1898.7	1632	35.4	190.3	9	63.9	41	12.1	-44.9	6	3.9	1857.7	40.1	-30	32.8	5.6	20	-18.3
BT1314SWRLCP06SMPU	2013	58	Anterselva	12845	26	11	71	2.3	86	M	15	80	1918.5	1613.2	31.8	193.5	28	87	80	-6.7	-48.5	9	4.1	1838.5	20.9	9	14	5.8	23	-21.9
BT1314SWRLCP05SWPU	2013	58	Anterselva	12845	26	11	71	2.3	86	M	20	0	1949	1609.8	156.8	182.4	1	278.2	0	-10.1	76.5	5	-3	1949	131.4	-71	10.6	-1.3	19	103.1
BT1314SWRLCP06SMPU	2013	58	Anterselva	12845	26	11	71	2.3	86	M	1	0	1880.6	1619.9	80.3	180.4	2	68.4	0	0	0	0	0	1880.6	63	-71	20.7	1.7	14	26.6
BT1314SWRLCP06SMPU	2013	58	Anterselva	12845	26	11	71	2.3	86	M	2	34	1882.1	1607.7	59.2	181.2	7	10.6	34	-12.2	-21.1	-4	4.8	1848.1	30.5	-37	8.5	6.5	10	5.5
BT1314SWRLCP06SMPU	2013	58	Anterselva	12845	26	11	71	2.3	86	M	4	71	1888.6	1599.2	53.7	164.7	20	30.3	71	-20.7	-26.6	-14	-1.7	1817.6	0	0	0	0	0	0
BT1314SWRLCP06SMPU	2013	58	Anterselva	12845	26	11	71	2.3	86	M	5	4	1889.2	1599.7	99.3	186.2	3	0	4	-20.2	19	7	-1.2	1885.2	67.6	-67	0.5	0.5	21	45.6
BT1314SWRLCP06SMPU	2013	58	Anterselva	12845	26	11	71	2.3	86	M	6	31	1891.2	1601.5	75	183.7	6	23.6	31	-18.4	-5.3	1	2.3	1860.2	42.6	-40	2.3	4	15	21.3
BT1314SWRLCP06SMPU	2013	58	Anterselva	12845	26	11	71	2.3	86	M	8	14	1903.5	1588.6	118.2	182.7	4	8.6	14	-31.3	37.9	-4	6.3	1889.5	71.9	-57	-10.6	8	10	64.5
BT1314SWRLCP06SMPU	2013	58	Anterselva	12845	26	11	71	2.3	86	M	9	25	1904.2	1579.7	117	182.5	5	22.9	25	-40.2	36.7	2	0.1	1879.2	61.6	-46	-19.5	1.8	16	63.3
BT1314SWRLCP06SMPU	2013	58	Anterselva	12845	26	11	71	2.3	86	M	10	58	1905.2	1612.8	56.5	177.9	15	96	58	-7.1	-23.8	-6	3.5	1847.2	29.6	-13	13.6	5.2	8	2.8
BT1314SWRLCP06SMPU	2013	58	Anterselva	12845	26	11	71	2.3	86	M	11	59	1906.9	1600.9	75.7	171.3	16	24.6	59	-19	-4.6	-9	-0.1	1847.9	30.3	-12	1.7	1.6	5	22
BT1314SWRLCP06SMPU	2013	58	Anterselva	12845	26	11	71	2.3	86	M	12	70	1910.9	1587.6	75.1	178.2	19	51.2	70	-32.3	-5.2	-10	7.8	1840.9	23.3	-1	-11.6	9.5	4	21.4
BT1314SWRLCP06SMPU	2013	58	Anterselva	12845	26	11	71	2.3	86	M	13	64	1912.6	1602	54.4	192.2	17	26.3	64	-17.9	-25.9	11	0.8	1848.6	31	-7	2.8	2.5	25	0.7
BT1314SWRLCP06SMPU	2013	58	Anterselva	12845	26	11	71	2.3	86	M	14	85	1914.6	1585.1	54	190.5	32	261.7	85	-34.8	-26.3	5	5.1	1829.6	12	14	-14.1	6.8	19	0.3
BT1314SWRLCP06SMPU	2013	58	Anterselva	12845	26	11	71	2.3	86	M	16	69	1931.8	1614.1	75.6	173.1	18	32	69	-5.8	-4.7	-14	6.7	1862.8	45.2	-2	14.9	8.4	0	21.9
BT1314SWRLCP06SMPU	2013	58	Anterselva	12845	26	11	71	2.3	86	M	17	48	1940.3	1602.9	97.4	192	11	4.8	48	-17	17.1	10	1.6	1892.3	74.7	-23	3.7	3.3	24	43.7
BT1314SWRLCP06SMPU	2013	58	Anterselva	12845	26	11	71	2.3	86	M	18	37	1944.5	1601.4	116.7	189.4	8	1.5	37	-18.5	36.4	2	7	1907.5	89.9	-34	2.2	8.7	16	63
BT1314SWRLCP06SMPU	2013	58	Anterselva	12845	26	11	71	2.3	86	M	19	78	1944.9	1583.6	94.9	188.4	24	117.7	78	-36.3	14.6	7	1	1866.9	49.3	7	-15.6	2.7	21	41.2
BT1314SWRLCP06SMPU	2013	58	Anterselva	12845	26	11	71	2.3	86	M	21	86	1951.6	1610.2	95.9	159.5	33	34	86	-9.7	15.6	-26	5.1	1865.6	48	15	11	6.8	-12	42.2
BT1314SWRLCP06SMPU	2013	58	Anterselva	12845	26	11	71	2.3	86	M	22	100	1955.8	1608.6	74.7	172.5	39	215.2	100	-11.3	-5.6	-7	-0.9	1855.8	38.2	29	9.4	0.8	7	21
BT1314SWRLCP06SMPU	2013	58	Anterselva	12845	26	11	71	2.3	86	M	23	117	1967.3	1591.9	73.8	184.6	49	180.5	117	-28	-6.5	5	-0.8	1850.3	32.7	46	-7.3	0.9	19	20.1
BT1314SWRLCP06SMPU	2013	58	Anterselva	12845	26	11	71	2.3	86	M	24	79	1967.6	1602.4	98.5	187.7	26	215.5	79	-17.5	18.2	6	1.3	1888.6	71	8	3.2	3	20	44.8
BT1314SWRLCP06SMPU	2013	58	Anterselva	12845	26	11	71	2.3	86	M	25	80	1973.3	1617	97.7	178.6	29	37.9	80	-2.9	17.4	-1	-0.8	1893.3	75.7	9	17.8	0.9	13	44
BT1314SWRLCP06SMPU	2013	58	Anterselva	12845	26	11	71	2.3	86	M	26	76	1975.8	1622.5	97	180.3	22	112.5	76	2.6	16.7	-7	6.9	1899.8	82.2	5	23.3	8.6	7	43.3
BT1314SWRLCP06SMPU	2013	58	Anterselva	12845	26	11	71	2.3	86	M	27	110	1976.2	1611	76.5	178.7	43	186.7	110	-8.9	-3.8	-2	0.3	1866.2	48.6	39	11.8	2	12	22.8
BT1314SWRLCP06SMPU	2013	58	Anterselva	12845	26	11	71	2.3	86	M	28	54	1976.6	1604.2	115.1	203.3	13	59.7	54	-15.7	34.8	16	6.9	1922.6	105	-17	5	8.6	30	61.4
BT1314SWRLCP06SMPU	2013	58	Anterselva	12845	26	11	71	2.3	86	M	29	97	1982.9	1618	75.6	192.3	37	123.9	97	-1.9	-4.7	10	1.9	1885.9	68.3	26	18.8	3.6	24	21.9
BT1314SWRLCP07SMPU	2013	60	Pokljuka	12375	39	33	92	5.9	29	M	30	125	2086.1	1652.5	99.8	208.8	32	222.8	123	1.5	51.9	43	3.9	1961.1	108.1	49	18.9	0.9	58	30.3
BT1314SWRLCP07SMPU	2013	60	Pokljuka	12375	39	33	92	5.9	29	M	1	2	1862.8	1651	47.9	161.9	2	8.6	0	0	0	0	0	1860.8	7.8	-74	17.4	-3	15	-21.6
BT1314SWRLCP06SWPU	2013	60	Pokljuka	12375	39	33	92	5.9	29	M	2	0	1871.4	1629.6	67.7	174.1	1	230.2	-2	-21.4	19.8	12	0.2	1871.4	18.4	-76	-4	-2.8	27	-1.8
BT1314SWRLCP07SMPU	2013	60	Pokljuka	12375	39	33	92	5.9	29	M	3	17	1890.2	1651.1	71.4	150.7	6	48.2	15	0.1	23.5	-11	-0.2	1873.2	20.2	-59	17.5	-3.2	4	1.9
BT1314SWRLCP07SMPU	2013	60	Pokljuka	12375	39	33	92	5.9	29	M	4	3	1903.8	1648.5	96.7	155.6	4	136.5	1	-2.5	48.8	-1	-5.3	1900.8	47.8	-73	14.9	-8.3	14	27.2
BT1314SWRLCP07SMPU	2013	60	Pokljuka	12375	39	33	92	5.9	29	M	5	17	1911	1672.8	50.2	171	5	41	15	21.8	2.3	2	7.1	1894	41	-59	39.2	4.1	17	-19.3
BT1314SWRLCP07SMPU	2013	60	Pokljuka	12375	39	33	92	5.9	29	M	6	52	1911.3	1621	66.4	171.9	15	87.2	50	-30	18.5	1	9	1859.3	6.3	-24	-12.6	6	16	-3.1
BT1314SWRLCP07SMPU	2013	60	Pokljuka	12375	39	33	92	5.9	29	M	7	21	1924.8	1611.7	117.2	174.9	7	27.4	19	-39.3	69.3	13	0	1903.8	50.8	-55	-21.9	-3	28	47.7
BT1314SWRLCP07SMPU	2013	60	Pokljuka	12375	39	33	92	5.9	29	M	8	76	1929	1633.6	69.5	149.9	20	80.5	74	-17.4	21.6	-15	3	1853	0	0	0	0	0	0
BT1314SWRLCP07SMPU	2013	60	Pokljuka	12375	39	33	92	5.9	29	M	9	32	1929.4	1608.7	115.2	173.5	9	149.8	30	-42.3	67.3	6	5.6	1897.4	44.4	-44	-24.9	2.6	21	45.7
BT1314SWRLCP07SMPU	2013	60	Pokljuka	12375	39	33	92	5.9	29	M	10	46	1943.3	1622.6	92.7	182	12	124.6	44	-28.4	44.8	14	6.1	1897.3	44.3	-30	-11	3.1	29	23.2
BT1314SWRLCP07SMPU	2013	60	Pokljuka	12375	39	33	92	5.9	29	M	11	69	1943.3	1632.8	68.7	172.8	19	130.2	67	-18.2	20.8	2	8.9	1874.3	21.3	-7	-0.8	5.9	17	-0.8
BT1314SWRLCP07SMPU	2013	60	Pokljuka	12375	39	33	92	5.9	29	M	12	47	1950	1617	118.1	167.9	14	106	45	-34	70.2	7	-1	1903	50	-29	-16.6	-4	22	48.6
BT1314SWRLCP07SMPU	2013	60	Pokljuka	12375	39	33	92	5.9	29	M	13	58	1950.3	1620.8	90.7	180.8	16	48.5	56	-30.2	42.8	16	2.9	1892.3	39.3	-18	-12.8	-0.1	31	21.2
BT1314SWRLCP07SMPU	2013	60	Pokljuka	12375	39	33	92	5.9	29	M	14	47	1968.8	1643.8	95.6	182.4	13	80.5	45	-7.2	47.7	18	2.5	1921.8	68.8	-29	10.2	-0.5	33	26.1
BT1314SWRLCP07SMPU	2013	60	Pokljuka	12375	39	33	92	5.9	29	M	15	44	1987.4	1657.4	95.4	190.6	11	166.5	42	6.4	47.5	19	9.7	1943.4	90.4	-32	23.8	6.7	34	25.9
BT1314SWRLCP07SMPU	2013	60	Pokljuka	12375	39	33	92	5.9	29	M	16	93	1992.6	1625.2	94.7	179.7	25	178.1	91	-25.8	46.8	11	6.8	1899.6	46.6	17	-8.4	3.8	26	25.2
BT1314SWRLCP07SMPU	2013	60	Pokljuka	12375	39	33	92	5.9	29	M	17	69	1993	1629.4	116.6	178	18	130.2	67	-21.6	68.7	13	3.1	1924	71	-7	-4.2	0.1	28	47.1
BT1314SWRLCP07SMPU	2013	60	Pokljuka	12375	39	33	92	5.9	29	M	18	64	1993	1638.4	117.4	173.2	17	87.5	62	-12.6	69.5	7	4.3	1929	76	-12	4.8	1.3	22	47.9
BT1314SWRLCP07SMPU	2013	60	Pokljuka	12375	39	33	92	5.9	29	M	19	3	1999.3	1639.7	161.9	194.7	3	0	1	-11.3	114	28	4.8	1996.3	143.3	-73	6.1	1.8	43	92.4
BT1314SWRLCP07SMPU	2013	60	Pokljuka	12375	39	33	92	5.9	29	M	20	131	2006.6	1621.3	74.3	180	33	223.3	129	-29.7	26.4	6	12.1	1875.6	22.6	55	-12.3	9.1	21	4.8
BT1314SWRLCP07SMPU	2013	60	Pokljuka	12375	39	33	92	5.9	29	M	21	24	2012.6	1636.4	165.6	186.6	8	62	22	-14.6	117.7	26	-1.3	1988.6	135.6	-52	2.8	-4.3	41	96.1
BT1314SWRLCP07SMPU	2013	60	Pokljuka	12375	39	33	92	5.9	29	M	22	39	2029.3	1652.7	162.2	175.4	10	66.6	37	1.7	114.3	5	8.5	1990.3	137.3	-37	19.1	5.5	20	92.7
BT1314SWRLCP07SMPU	2013	60	Pokljuka	12375	39	33	92	5.9	29	M	23	104	2039.1	1632.4	117.2	185.5	29	299.3	102	-18.6	69.3	12	11.6	1935.1	82.1	28	-1.2	8.6	27	47.7
BT1314SWRLCP07SMPU	2013	60	Pokljuka	12375	39	33	92	5.9	29	M	24	88	2040.9	1611.6	158.8	182.5	24	206.5	86	-39.4	110.9	23	-2.4	1952.9	99.9	12	-22	-5.4	38	89.3
BT1314SWRLCP07SMPU	2013	60	Pokljuka	12375	39	33	92	5.9	29	M	25	78	2040.9	1675.1	101.3	186.5	21	66.2	76	24.1	53.4	10	14.6	1962.9	109.9	2	41.5	11.6	25	31.8
BT1314SWRLCP07SMPU	2013	60	Pokljuka	12375	39	33	92	5.9	29	M	26	78	2041.9	1633.8	140.3	189.8	22	178.1	76	-17.2	92.4	21	6.9	1963.9	110.9	2	0.2	3.9	36	70.8
BT1314SWRLCP07SMPU	2013	60	Pokljuka	12375	39	33	92	5.9	29	M	27	105	2068.6	1621.7	145.4	196.5	30	176.3	103	-29.3	97.5	25	9.6	1963.6	110.6	29	-11.9	6.6	40	75.9
BT1314SWRLCP07SMPU	2013	60	Pokljuka	12375	39	33	92	5.9	29	M	28	83	2069.3	1669.6	144.2	172.5	23	179.1	81	18.6	96.3	3	7.6	1986.3	133.3	7	36	4.6	18	74.7
BT1314SWRLCP07SMPU	2013	60	Pokljuka	12375	39	33	92	5.9	29	M	29	109	2085.6	1680.6	129.8	166.2	31	205.8	107	29.6	81.9	-4	8.3	1976.6	123.6	33	47	5.3	11	60.3
BT1314SWRLCP07SWPU	2013	62	Kontiolahti	12628	37	22	76	-4.4	52	M	1	0	2017.1	1677.5	138.2	201.4	1	475.1	0	0	0	0	0	2017.1	78.6	-120	-16	-9.1	13.9	89.8
BT1314SWRLCP08SMPU	2013	62	Kontiolahti	12628	37	22	76	-4.4	52	M	2	40	2033.4	1656.4	89.1	247.9	11	25.4	40	-21.1	-49.1	48.3	-1.8	1993.4	54.9	-80	-37.1	-10.9	62.2	40.7
BT1314SWRLCP08SMPU	2013	62	Kontiolahti	12628	37	22	76	-4.4	52	M	3	59	2037.5	1687.5	91.6	199.4	16	31.8	59	10	-46.6	-8	6	1978.5	40	-61	-6	-3.1	5.9	43.2
BT1314SWRLCP08SMPU	2013	62	Kontiolahti	12628	37	22	76	-4.4	52	M	4	40	2042.5	1690.1	110.7	201.7	10	63	40	12.6	-27.5	-4.1	4.4	2002.5	64	-80	-3.4	-4.7	9.8	62.3
BT1314SWRLCP08SMPU	2013	62	Kontiolahti	12628	37	22	76	-4.4	52	M	5	44	2045.8	1670.5	111.1	220.2	12	16.3	44	-7	-27.1	17.1	1.7	2001.8	63.3	-76	-23	-7.4	31	62.7
BT1314SWRLCP08SMPU	2013	62	Kontiolahti	12628	37	22	76	-4.4	52	M	6	107	2048.6	1659.4	70.4	211.8	41	118.3	107	-18.1	-67.8	5.5	4.9	1941.6	3.1	-13	-34.1	-4.2	19.4	22
BT1314SWRLCP08SMPU	2013	62	Kontiolahti	12628	37	22	76	-4.4	52	M	7	73	2048.8	1677.6	91.1	207.1	22	32.1	73	0.1	-47.1	7.8	-2.1	1975.8	37.3	-47	-15.9	-11.2	21.7	42.7
BT1314SWRLCP08SMPU	2013	62	Kontiolahti	12628	37	22	76	-4.4	52	M	8	51	2048.9	1666.4	114.2	217.3	15	101	51	-11.1	-24	6.2	9.7	1997.9	59.4	-69	-27.1	0.6	20.1	65.8
BT1314SWRLCP08SMPU	2013	62	Kontiolahti	12628	37	22	76	-4.4	52	M	9	72	2049.2	1685.1	66.5	225.6	21	93.1	72	7.6	-71.7	22	2.2	1977.2	38.7	-48	-8.4	-6.9	35.9	18.1
BT1314SWRLCP08SMPU	2013	62	Kontiolahti	12628	37	22	76	-4.4	52	M	10	34	2049.5	1681	133.9	200.6	8	56.4	34	3.5	-4.3	-4	3.2	2015.5	77	-86	-12.5	-5.9	9.9	85.5
BT1314SWRLCP08SMPU	2013	62	Kontiolahti	12628	37	22	76	-4.4	52	M	11	120	2058.5	1693.5	48.4	196.6	45	244.5	120	16	-89.8	-13.9	9.1	1938.5	0	0	0	0	0	0
BT1314SWRLCP08SMPU	2013	62	Kontiolahti	12628	37	22	76	-4.4	52	M	12	83	2060.7	1653	113.5	211.2	25	263.6	83	-24.5	-24.7	11.3	-1.5	1977.7	39.2	-37	-40.5	-10.6	25.2	65.1
BT1314SWRLCP08SMPU	2013	62	Kontiolahti	12628	37	22	76	-4.4	52	M	13	84	2061.8	1677	88.2	212.6	29	63.5	84	-0.5	-50	9.7	1.5	1977.8	39.3	-36	-16.5	-7.6	23.6	39.8
BT1314SWRLCP08SMPU	2013	62	Kontiolahti	12628	37	22	76	-4.4	52	M	14	19	2062.5	1689.4	126.6	227.5	3	0	19	11.9	-11.6	21.8	4.3	2043.5	105	-101	-4.1	-4.8	35.7	78.2
BT1314SWRLCP08SMPU	2013	62	Kontiolahti	12628	37	22	76	-4.4	52	M	15	91	2072.5	1663.4	92	226.1	33	110.1	91	-14.1	-46.2	23.3	1.4	1981.5	43	-29	-30.1	-7.7	37.2	43.6
BT1314SWRLCP08SMPU	2013	62	Kontiolahti	12628	37	22	76	-4.4	52	M	16	33	2073.5	1646.9	147.9	245.7	7	110.1	33	-30.6	9.7	46.2	-1.9	2040.5	102	-87	-46.6	-11	60.1	99.5
BT1314SWRLCP08SMPU	2013	62	Kontiolahti	12628	37	22	76	-4.4	52	M	17	70	2074	1682.3	109.7	212	19	62.9	70	4.8	-28.5	7.5	3.1	2004	65.5	-50	-11.2	-6	21.4	61.3
BT1314SWRLCP08SMPU	2013	62	Kontiolahti	12628	37	22	76	-4.4	52	M	18	65	2080	1710.8	87.3	216.9	18	88.1	65	33.3	-50.9	11.8	3.7	2015	76.5	-55	17.3	-5.4	25.7	38.9
BT1314SWRLCP08SMPU	2013	62	Kontiolahti	12628	37	22	76	-4.4	52	M	19	37	2080.1	1682.4	156.3	204.4	9	32.4	37	4.9	18.1	0.8	2.2	2043.1	104.6	-83	-11.1	-6.9	14.7	107.9
BT1314SWRLCP08SMPU	2013	62	Kontiolahti	12628	37	22	76	-4.4	52	M	20	83	2080.6	1691.1	91	215.5	28	135.4	83	13.6	-47.2	12.6	1.5	1997.6	59.1	-37	-2.4	-7.6	26.5	42.6
BT1314SWRLCP08SMPU	2013	62	Kontiolahti	12628	37	22	76	-4.4	52	M	21	84	2080.9	1699.1	68.3	229.5	30	44.7	84	21.6	-69.9	29.5	-1.4	1996.9	58.4	-36	5.6	-10.5	43.4	19.9
BT1314SWRLCP08SMPU	2013	62	Kontiolahti	12628	37	22	76	-4.4	52	M	22	97	2081.1	1697.2	90.2	196.7	35	55.4	97	19.7	-48	-8.8	4.1	1984.1	45.6	-23	3.7	-5	5.1	41.8
BT1314SWRLCP08SMPU	2013	62	Kontiolahti	12628	37	22	76	-4.4	52	M	23	83	2094.6	1666.3	136.2	209.1	26	43.6	83	-11.2	-2	7.3	0.4	2011.6	73.1	-37	-27.2	-8.7	21.2	87.8
BT1314SWRLCP08SMPU	2013	62	Kontiolahti	12628	37	22	76	-4.4	52	M	24	64	2105.2	1680.9	149	211.3	17	20.4	64	3.4	10.8	4.5	5.4	2041.2	102.7	-56	-12.6	-3.7	18.4	100.6
BT1314SWRLCP08SMPU	2013	62	Kontiolahti	12628	37	22	76	-4.4	52	M	25	71	2110.2	1701.3	132.4	205.5	20	56.9	71	23.8	-5.8	-4.5	8.6	2039.2	100.7	-49	7.8	-0.5	9.4	84
BT1314SWRLCP08SMPU	2013	62	Kontiolahti	12628	37	22	76	-4.4	52	M	26	46	2114.6	1691.2	176	201.4	13	28.7	46	13.7	37.8	-3.8	3.8	2068.6	130.1	-74	-2.3	-5.3	10.1	127.6
BT1314SWRLCP08SMPU	2013	62	Kontiolahti	12628	37	22	76	-4.4	52	M	27	47	2118.1	1679.9	170.1	221.1	14	97.5	47	2.4	31.9	16.8	2.9	2071.1	132.6	-73	-13.6	-6.2	30.7	121.7
BT1314SWRLCP08SMPU	2013	62	Kontiolahti	12628	37	22	76	-4.4	52	M	28	26	2127.2	1668	200.6	232.6	5	206.1	26	-9.5	62.4	28.8	2.4	2101.2	162.7	-94	-25.5	-6.7	42.7	152.2
BT1314SWRLCP08SMPU	2013	62	Kontiolahti	12628	37	22	76	-4.4	52	M	29	87	2127.2	1677.8	117.4	245	32	121.3	87	0.3	-20.8	44	-0.4	2040.2	101.7	-33	-15.7	-9.5	57.9	69
BT1314SWRLCP08SMPU	2013	62	Kontiolahti	12628	37	22	76	-4.4	52	M	30	99	2135.4	1712.8	72.5	251.1	38	151.8	99	35.3	-65.7	46.6	3.1	2036.4	97.9	-21	19.3	-6	60.5	24.1
BT1314SWRLCP09SMPU	2013	64	Holmenkollen	12463	50	45	87	3.1	84	M	1	31	1943.4	1716.8	31.7	163.9	6	119.2	0	0	0	0	0	1912.4	0	0	0	0	0	0
BT1314SWRLCP09SMPU	2013	64	Holmenkollen	12463	50	45	87	3.1	84	M	5	72	2001.6	1741.7	31.9	156	24	159.1	41	24.9	0.2	-6.8	-1.1	1929.6	17.2	41	24.9	-1.1	-6.8	0.2
BT1314SWRLCP09SMPU	2013	64	Holmenkollen	12463	50	45	87	3.1	84	M	14	89	2027	1697	77.7	163.3	34	83.6	58	-19.8	46	-4.4	3.8	1938	25.6	58	-19.8	3.8	-4.4	46
BT1314SWRLCP09SMPU	2013	64	Holmenkollen	12463	50	45	87	3.1	84	M	2	14	1964.1	1720.8	53.9	175.4	3	69.9	-17	4	22.2	10.4	1.1	1950.1	37.7	-17	4	1.1	10.4	22.2
BT1314SWRLCP09SMPU	2013	64	Holmenkollen	12463	50	45	87	3.1	84	M	3	57	1984.5	1693.2	53.4	180.9	17	129.7	26	-23.6	21.7	22.8	-5.8	1927.5	15.1	26	-23.6	-5.8	22.8	21.7
BT1314SWRLCP09SMPU	2013	64	Holmenkollen	12463	50	45	87	3.1	84	M	4	45	2000.4	1654.5	118	182.9	11	97.5	14	-62.3	86.3	22.9	-3.9	1955.4	43	14	-62.3	-3.9	22.9	86.3
BT1314SWRLCP09SMPU	2013	64	Holmenkollen	12463	50	45	87	3.1	84	M	6	64	2006.7	1676.9	74.2	191.6	20	83	33	-39.9	42.5	25.3	2.4	1942.7	30.3	33	-39.9	2.4	25.3	42.5
BT1314SWRLCP08SWPU	2013	64	Holmenkollen	12463	50	45	87	3.1	84	M	7	0	2012.3	1690.5	147.6	174.2	1	349.7	-31	-26.3	115.9	11.9	-1.6	2012.3	99.9	-31	-26.3	-1.6	11.9	115.9
BT1314SWRLCP09SMPU	2013	64	Holmenkollen	12463	50	45	87	3.1	84	M	8	14	2013.3	1695.3	108.4	195.6	2	68.9	-17	-21.5	76.7	33.2	-1.5	1999.3	86.9	-17	-21.5	-1.5	33.2	76.7
BT1314SWRLCP09SMPU	2013	64	Holmenkollen	12463	50	45	87	3.1	84	M	9	35	2013.5	1697.2	100.7	180.6	9	110.3	4	-19.6	69	14.5	2.2	1978.5	66.1	4	-19.6	2.2	14.5	69
BT1314SWRLCP09SMPU	2013	64	Holmenkollen	12463	50	45	87	3.1	84	M	10	53	2014.3	1701.5	75.7	184.1	15	117.5	22	-15.3	44	19.4	0.8	1961.3	48.9	22	-15.3	0.8	19.4	44
BT1314SWRLCP09SMPU	2013	64	Holmenkollen	12463	50	45	87	3.1	84	M	11	62	2024.1	1677.3	100.8	184	18	41.1	31	-39.5	69.1	18.5	1.6	1962.1	49.7	31	-39.5	1.6	18.5	69.1
BT1314SWRLCP09SMPU	2013	64	Holmenkollen	12463	50	45	87	3.1	84	M	12	86	2025.2	1689.3	76.6	173.3	32	118.4	55	-27.5	44.9	15.6	-6.2	1939.2	26.8	55	-27.5	-6.2	15.6	44.9
BT1314SWRLCP09SMPU	2013	64	Holmenkollen	12463	50	45	87	3.1	84	M	13	63	2026.4	1688.4	100.3	174.7	19	80.7	32	-28.4	68.6	15	-4.2	1963.4	51	32	-28.4	-4.2	15	68.6
BT1314SWRLCP09SMPU	2013	64	Holmenkollen	12463	50	45	87	3.1	84	M	15	89	2027	1685.6	76.8	175.6	33	81.8	58	-31.2	45.1	14.4	-2.7	1938	25.6	58	-31.2	-2.7	14.4	45.1
BT1314SWRLCP09SMPU	2013	64	Holmenkollen	12463	50	45	87	3.1	84	M	16	106	2030.4	1648.8	101.9	173.7	39	234.8	75	-68	70.2	6.3	3.5	1924.4	12	75	-68	3.5	6.3	70.2
BT1314SWRLCP09SMPU	2013	64	Holmenkollen	12463	50	45	87	3.1	84	M	17	72	2034.5	1730.2	53.2	179.1	25	58.2	41	13.4	21.5	17.4	-2.2	1962.5	50.1	41	13.4	-2.2	17.4	21.5
BT1314SWRLCP09SMPU	2013	64	Holmenkollen	12463	50	45	87	3.1	84	M	18	98	2034.7	1676.6	74.3	185.8	36	347.5	67	-40.2	42.6	28	-6.1	1936.7	24.3	67	-40.2	-6.1	28	42.6
BT1314SWRLCP09SMPU	2013	64	Holmenkollen	12463	50	45	87	3.1	84	M	19	39	2040.9	1715.1	104.5	182.3	10	70.1	8	-1.7	72.8	15.6	2.8	2001.9	89.5	8	-1.7	2.8	15.6	72.8
BT1314SWRLCP09SMPU	2013	64	Holmenkollen	12463	50	45	87	3.1	84	M	20	34	2053.7	1680.1	144.6	195	8	160	3	-36.7	112.9	31.3	-0.2	2019.7	107.3	3	-36.7	-0.2	31.3	112.9
BT1314SWRLCP09SMPU	2013	64	Holmenkollen	12463	50	45	87	3.1	84	M	21	52	2060.9	1696.5	123.1	189.3	14	118.9	21	-20.3	91.4	21.2	4.2	2008.9	96.5	21	-20.3	4.2	21.2	91.4
BT1314SWRLCP09SMPU	2013	64	Holmenkollen	12463	50	45	87	3.1	84	M	22	65	2061.6	1692.8	122.9	180.9	21	63.3	34	-24	91.2	18	-1	1996.6	84.2	34	-24	-1	18	91.2
BT1314SWRLCP09SMPU	2013	64	Holmenkollen	12463	50	45	87	3.1	84	M	23	82	2061.8	1701.9	99.7	178.2	31	133.8	51	-14.9	68	16.4	-2.1	1979.8	67.4	51	-14.9	-2.1	16.4	68
BT1314SWRLCP09SMPU	2013	64	Holmenkollen	12463	50	45	87	3.1	84	M	24	74	2061.9	1707.1	100.6	180.2	26	91.1	43	-9.7	68.9	16.9	-0.6	1987.9	75.5	43	-9.7	-0.6	16.9	68.9
BT1314SWRLCP09SMPU	2013	64	Holmenkollen	12463	50	45	87	3.1	84	M	25	48	2062.3	1695.7	124.7	193.9	13	156.8	17	-21.1	93	28.6	1.4	2014.3	101.9	17	-21.1	1.4	28.6	93
BT1314SWRLCP09SMPU	2013	64	Holmenkollen	12463	50	45	87	3.1	84	M	26	26	2062.6	1700.1	148.3	188.2	5	20.7	-5	-16.7	116.6	27.7	-3.4	2036.6	124.2	-5	-16.7	-3.4	27.7	116.6
BT1314SWRLCP09SMPU	2013	64	Holmenkollen	12463	50	45	87	3.1	84	M	27	53	2073.1	1744.3	96.2	179.6	16	70.9	22	27.5	64.5	18	-2.3	2020.1	107.7	22	27.5	-2.3	18	64.5
BT1314SWRLCP09SMPU	2013	64	Holmenkollen	12463	50	45	87	3.1	84	M	28	77	2075.9	1743.5	78.7	176.7	28	180.7	46	26.7	47	16.8	-4	1998.9	86.5	46	26.7	-4	16.8	47
BT1314SWRLCP09SMPU	2013	64	Holmenkollen	12463	50	45	87	3.1	84	M	29	79	2077.2	1700.7	119.9	177.6	30	247.7	48	-16.1	88.2	12.8	0.9	1998.2	85.8	48	-16.1	0.9	12.8	88.2
BT1314SWRLCP09SMPU	2013	64	Holmenkollen	12463	50	45	87	3.1	84	M	30	106	2077.4	1737.6	50.8	183	41	183.5	75	20.8	19.1	20.8	-1.7	1971.4	59	75	20.8	-1.7	20.8	19.1
BT1314SWRLOG__SMPU	2013	66	Sochi	12807	31	31	86	3.6	66	M	5	46	2065.3	1791.1	57.2	171	16	39.1	34	7.7	-7.2	8	-5.8	2019.3	5.5	7	8.6	-10	7	-0.1
BT1314SWRLOG__SMPU	2013	66	Sochi	12807	31	31	86	3.6	66	M	17	35	2093.1	1812.3	77.9	167.9	12	111.4	23	28.9	13.5	10	-10.9	2058.1	44.3	-4	29.8	-15.1	9	20.6
BT1314SWRLOG__SMPU	2013	66	Sochi	12807	31	31	86	3.6	66	M	26	10	2145.3	1858.7	109.3	167.3	5	58.5	-2	75.3	44.9	-9	7.5	2135.3	121.5	-29	76.2	3.3	-10	52
BT1314SWRLOG__SMPU	2013	66	Sochi	12807	31	31	86	3.6	66	M	28	98	2151.2	1862.2	33.2	157.8	42	179.5	86	78.8	-31.2	-15	4	2053.2	39.4	59	79.7	-0.2	-16	-24.1
BT1314SWRLOG__SMPU	2013	66	Sochi	12807	31	31	86	3.6	66	M	1	12	2028.6	1783.4	64.4	168.8	6	116.7	0	0	0	0	0	2016.6	2.8	-27	0.9	-4.2	-1	7.1
BT1314SWRLOG__SMPU	2013	66	Sochi	12807	31	31	86	3.6	66	M	2	15	2042.7	1808.3	34.9	184.5	8	40.3	3	24.9	-29.5	7	8.7	2027.7	13.9	-24	25.8	4.5	6	-22.4
BT1314SWRLOG__SMPU	2013	66	Sochi	12807	31	31	86	3.6	66	M	3	39	2052.8	1782.5	57.3	174	14	49.1	27	-0.9	-7.1	1	4.2	2013.8	0	0	0	0	0	0
BT1314SWRLCP09SWPU	2013	66	Sochi	12807	31	31	86	3.6	66	M	4	0	2054.5	1791.1	106.2	157.2	1	392.9	-12	7.7	41.8	-15	3.4	2054.5	40.7	-39	8.6	-0.8	-16	48.9
BT1314SWRLOG__SMPU	2013	66	Sochi	12807	31	31	86	3.6	66	M	6	43	2067.7	1796.1	58.4	170.2	15	24.2	31	12.7	-6	1	0.4	2024.7	10.9	4	13.6	-3.8	0	1.1
BT1314SWRLOG__SMPU	2013	66	Sochi	12807	31	31	86	3.6	66	M	7	29	2068.8	1806.6	59.6	173.6	9	14.1	17	23.2	-4.8	-3	7.8	2039.8	26	-10	24.1	3.6	-4	2.3
BT1314SWRLOG__SMPU	2013	66	Sochi	12807	31	31	86	3.6	66	M	8	14	2068.9	1815.7	82.9	156.3	7	0	2	32.3	18.5	-14	1.5	2054.9	41.1	-25	33.2	-2.7	-15	25.6
BT1314SWRLOG__SMPU	2013	66	Sochi	12807	31	31	86	3.6	66	M	9	47	2076.9	1777.5	54.6	197.8	17	36.7	35	-5.9	-9.8	25	4	2029.9	16.1	8	-5	-0.2	24	-2.7
BT1314SWRLOG__SMPU	2013	66	Sochi	12807	31	31	86	3.6	66	M	10	1	2077.5	1785.8	111.3	179.4	2	25.9	-11	2.4	46.9	4	6.6	2076.5	62.7	-38	3.3	2.4	3	54
BT1314SWRLOG__SMPU	2013	66	Sochi	12807	31	31	86	3.6	66	M	11	36	2077.7	1821.4	58.5	161.8	13	64.5	24	38	-5.9	-17	10	2041.7	27.9	-3	38.9	5.8	-18	1.2
BT1314SWRLOG__SMPU	2013	66	Sochi	12807	31	31	86	3.6	66	M	12	52	2083	1815.4	35.3	180.3	20	108.4	40	32	-29.1	5	6.5	2031	17.2	13	32.9	2.3	4	-22
BT1314SWRLOG__SMPU	2013	66	Sochi	12807	31	31	86	3.6	66	M	13	48	2085.7	1765.7	104.7	167.3	18	48.3	36	-17.7	40.3	-3	1.5	2037.7	23.9	9	-16.8	-2.7	-4	47.4
BT1314SWRLOG__SMPU	2013	66	Sochi	12807	31	31	86	3.6	66	M	14	6	2087.1	1811.3	105.8	164	4	106.4	-6	27.9	41.4	-9	4.2	2081.1	67.3	-33	28.8	0	-10	48.5
BT1314SWRLOG__SMPU	2013	66	Sochi	12807	31	31	86	3.6	66	M	15	70	2087.7	1787.9	58.3	171.5	27	111.2	58	4.5	-6.1	-6	8.7	2017.7	3.9	31	5.4	4.5	-7	1
BT1314SWRLOG__SMPU	2013	66	Sochi	12807	31	31	86	3.6	66	M	16	53	2093.1	1767.4	101.6	171.1	21	54.4	41	-16	37.2	-4	6.3	2040.1	26.3	14	-15.1	2.1	-5	44.3
BT1314SWRLOG__SMPU	2013	66	Sochi	12807	31	31	86	3.6	66	M	18	91	2115	1801.9	57.9	164.2	36	166.2	79	18.5	-6.5	-10	5.4	2024	10.2	52	19.4	1.2	-11	0.6
BT1314SWRLOG__SMPU	2013	66	Sochi	12807	31	31	86	3.6	66	M	19	88	2121.4	1796.3	59.6	177.5	34	310.9	76	12.9	-4.8	5	3.7	2033.4	19.6	49	13.8	-0.5	4	2.3
BT1314SWRLOG__SMPU	2013	66	Sochi	12807	31	31	86	3.6	66	M	20	6	2135	1818	136.3	174.7	3	48.9	-6	34.6	71.9	-2	7.9	2129	115.2	-33	35.5	3.7	-3	79
BT1314SWRLOG__SMPU	2013	66	Sochi	12807	31	31	86	3.6	66	M	21	105	2135.6	1799.8	59.9	170.9	46	342.8	93	16.4	-4.5	-1	3.1	2030.6	16.8	66	17.3	-1.1	-2	2.6
BT1314SWRLOG__SMPU	2013	66	Sochi	12807	31	31	86	3.6	66	M	22	50	2137	1834.6	78.7	173.7	19	57.1	38	51.2	14.3	3	1.9	2087	73.2	11	52.1	-2.3	2	21.4
BT1314SWRLOG__SMPU	2013	66	Sochi	12807	31	31	86	3.6	66	M	23	91	2138.4	1787.3	103.2	156.9	37	86.4	79	3.9	38.8	-12	0.1	2047.4	33.6	52	4.8	-4.1	-13	45.9
BT1314SWRLOG__SMPU	2013	66	Sochi	12807	31	31	86	3.6	66	M	24	67	2139.8	1775.1	125.7	172	26	138.3	55	-8.3	61.3	0	3.2	2072.8	59	28	-7.4	-1	-1	68.4
BT1314SWRLOG__SMPU	2013	66	Sochi	12807	31	31	86	3.6	66	M	25	34	2140	1809.2	120.1	176.7	11	142.6	22	25.8	55.7	5	2.9	2106	92.2	-5	26.7	-1.3	4	62.8
BT1314SWRLOG__SMPU	2013	66	Sochi	12807	31	31	86	3.6	66	M	27	97	2150.5	1807.3	86	160.2	39	154.8	85	23.9	21.6	-14	5.4	2053.5	39.7	58	24.8	1.2	-15	28.7
BT1314SWRLOG__SMPU	2013	66	Sochi	12807	31	31	86	3.6	66	M	29	100	2157	1815.5	62.9	178.6	43	122.6	88	32.1	-1.5	6	3.8	2057	43.2	61	33	-0.4	5	5.6
BT1314SWRLOG__SMPU	2013	66	Sochi	12807	31	31	86	3.6	66	M	30	63	2166.9	1821.8	106.9	175.2	25	152.3	51	38.4	42.5	1	5.4	2103.9	90.1	24	39.3	1.2	0	49.6
BT1213SWRLCP01SMPU	2012	68	Oestersund	13085	29	14	78	-12	71	M	1	40	1983.5	1674.3	50.6	218.6	10	4.1	0	0	0	0	0	1943.5	24.7	-28	-5	0.2	27.5	2
BT1213SWRLCP01SMPU	2012	68	Oestersund	13085	29	14	78	-12	71	M	2	38	1984.2	1700.4	49.4	196.4	8	5	-2	26.1	-1.2	-27.8	5.6	1946.2	27.4	-30	21.1	5.8	-0.3	0.8
BT1213SWRLCP01SMPU	2012	68	Oestersund	13085	29	14	78	-12	71	M	3	68	1986.8	1679.3	48.6	190.9	23	65.5	28	5	-2	-27.5	-0.2	1918.8	0	0	0	0	0	0
BT1213SWRLCP01SMPU	2012	68	Oestersund	13085	29	14	78	-12	71	M	4	40	1987.6	1679	49.9	218.7	9	0.7	0	4.7	-0.7	0	0.1	1947.6	28.8	-28	-0.3	0.3	27.5	1.3
BT1213SWRLCP01SMPU	2012	68	Oestersund	13085	29	14	78	-12	71	M	5	35	1988.5	1681.4	73.2	198.9	7	38.2	-5	7.1	22.6	-26.9	7.2	1953.5	34.7	-33	2.1	7.4	0.6	24.6
BT1213SWRLCP01SMPU	2012	68	Oestersund	13085	29	14	78	-12	71	M	6	18	2002.5	1707.7	73.8	203	2	61.3	-22	33.4	23.2	-16.2	0.6	1984.5	65.7	-50	28.4	0.8	11.3	25.2
BT1213SWRLCP01SMPU	2012	68	Oestersund	13085	29	14	78	-12	71	M	7	60	2005	1675.6	67.5	201.9	21	38.8	20	1.3	16.9	-24.1	7.4	1945	26.2	-8	-3.7	7.6	3.4	18.9
BT1213SWRLCP01SMPU	2012	68	Oestersund	13085	29	14	78	-12	71	M	8	42	2008.8	1687.4	75.3	204.1	11	0	2	13.1	24.7	-22.8	8.3	1966.8	48	-26	8.1	8.5	4.7	26.7
BT1213SWRLCP01SMPU	2012	68	Oestersund	13085	29	14	78	-12	71	M	9	57	2010.5	1678.8	71.6	203.1	19	59.6	17	4.5	21	-13.9	-1.6	1953.5	34.7	-11	-0.5	-1.4	13.6	23
BT1213SWRLCP01SMPU	2012	68	Oestersund	13085	29	14	78	-12	71	M	10	80	2018.4	1715.4	27.8	195.2	28	79.1	40	41.1	-22.8	-25.1	1.7	1938.4	19.6	12	36.1	1.9	2.4	-20.8
BT1213SWRLCP01SMPU	2012	68	Oestersund	13085	29	14	78	-12	71	M	11	35	2021.7	1737.6	29.7	219.4	6	138.4	-5	63.3	-20.9	-7.7	8.5	1986.7	67.9	-33	58.3	8.7	19.8	-18.9
BT1213SWRLCP01SMPU	2012	68	Oestersund	13085	29	14	78	-12	71	M	12	60	2022.3	1682.2	48.4	231.7	20	27	20	7.9	-2.2	7.8	5.3	1962.3	43.5	-8	2.9	5.5	35.3	-0.2
BT1213SWRLCP01SMPU	2012	68	Oestersund	13085	29	14	78	-12	71	M	13	48	2041.9	1685	92.5	216.4	14	129.8	8	10.7	41.9	-1.1	-1.1	1993.9	75.1	-20	5.7	-0.9	26.4	43.9
BT1213SWRLCP01SMPU	2012	68	Oestersund	13085	29	14	78	-12	71	M	14	50	2042.5	1707.8	69.4	215.3	16	179.5	10	33.5	18.8	-7.5	4.2	1992.5	73.7	-18	28.5	4.4	20	20.8
BT1213SWRLCP01SMPU	2012	68	Oestersund	13085	29	14	78	-12	71	M	15	52	2043.1	1700.2	70.1	220.8	18	231.8	12	25.9	19.5	5.5	-3.3	1991.1	72.3	-16	20.9	-3.1	33	21.5
BT1314SWRLOG__SWPU	2012	68	Oestersund	13085	29	14	78	-12	71	M	16	0	2044.8	1744.6	98.8	201.4	1	303.5	-40	70.3	48.2	-26.4	9.2	2044.8	126	-68	65.3	9.4	1.1	50.2
BT1213SWRLCP01SMPU	2012	68	Oestersund	13085	29	14	78	-12	71	M	17	62	2049	1686.5	95.9	204.6	22	21.5	22	12.2	45.3	-19	5	1987	68.2	-6	7.2	5.2	8.5	47.3
BT1213SWRLCP01SMPU	2012	68	Oestersund	13085	29	14	78	-12	71	M	18	109	2050.1	1677.4	48.9	214.8	46	176	69	3.1	-1.7	-6.9	3.1	1941.1	22.3	41	-1.9	3.3	20.6	0.3
BT1213SWRLCP01SMPU	2012	68	Oestersund	13085	29	14	78	-12	71	M	19	84	2052.3	1685.1	93.2	190	34	243.3	44	10.8	42.6	-29	0.4	1968.3	49.5	16	5.8	0.6	-1.5	44.6
BT1213SWRLCP01SMPU	2012	68	Oestersund	13085	29	14	78	-12	71	M	20	42	2054.2	1700.2	93.6	218.4	12	25.3	2	25.9	43	-4.7	4.5	2012.2	93.4	-26	20.9	4.7	22.8	45
BT1213SWRLCP01SMPU	2012	68	Oestersund	13085	29	14	78	-12	71	M	21	80	2055.6	1695.5	70.3	209.8	30	98.8	40	21.2	19.7	-2.7	-6.1	1975.6	56.8	12	16.2	-5.9	24.8	21.7
BT1213SWRLCP01SMPU	2012	68	Oestersund	13085	29	14	78	-12	71	M	22	30	2057.8	1707.1	118.4	202.3	4	126.5	-10	32.8	67.8	-20	3.7	2027.8	109	-38	27.8	3.9	7.5	69.8
BT1213SWRLCP01SMPU	2012	68	Oestersund	13085	29	14	78	-12	71	M	23	79	2062.6	1698.9	71.9	212.8	27	180.7	39	24.6	21.3	-11.3	5.5	1983.6	64.8	11	19.6	5.7	16.2	23.3
BT1213SWRLCP01SMPU	2012	68	Oestersund	13085	29	14	78	-12	71	M	24	93	2063.6	1697.3	72.2	201.1	40	225.7	53	23	21.6	-14	-3.5	1970.6	51.8	25	18	-3.3	13.5	23.6
BT1213SWRLCP01SMPU	2012	68	Oestersund	13085	29	14	78	-12	71	M	25	80	2082.3	1692.2	112.6	197.5	29	34.9	40	17.9	62	-12.4	-8.7	2002.3	83.5	12	12.9	-8.5	15.1	64
BT1213SWRLCP01SMPU	2012	68	Oestersund	13085	29	14	78	-12	71	M	26	70	2085.7	1678.3	115.9	221.5	24	3.3	30	4	65.3	1.3	1.6	2015.7	96.9	2	-1	1.8	28.8	67.3
BT1213SWRLCP01SMPU	2012	68	Oestersund	13085	29	14	78	-12	71	M	27	94	2085.9	1686.1	93.3	212.5	41	80.1	54	11.8	42.7	-2.2	-3.9	1991.9	73.1	26	6.8	-3.7	25.3	44.7
BT1213SWRLCP01SMPU	2012	68	Oestersund	13085	29	14	78	-12	71	M	28	71	2093.1	1715.1	96.7	210.3	25	102.2	31	40.8	46.1	-16	7.7	2022.1	103.3	3	35.8	7.9	11.5	48.1
BT1213SWRLCP01SMPU	2012	68	Oestersund	13085	29	14	78	-12	71	M	29	88	2093.7	1652.7	115.7	237.3	37	178.4	48	-21.6	65.1	17.1	1.6	2005.7	86.9	20	-26.6	1.8	44.6	67.1
BT1213SWRLCP01SMPU	2012	68	Oestersund	13085	29	14	78	-12	71	M	30	25	2110	1734	144.5	206.5	3	19	-15	59.7	93.9	-10.9	-1.2	2085	166.2	-43	54.7	-1	16.6	95.9
BT1213SWRLCP02SMPU	2012	70	Hochfilzen	12750	33	20	91	-5.7	69	M	3	0	2063.4	1760.9	90.1	212.4	2	15.1	-14	-13	19.2	26	-9.6	2063.4	44.7	-37	-3.7	-7.1	11	44.5
BT1213SWRLCP02SMPU	2012	70	Hochfilzen	12750	33	20	91	-5.7	69	M	21	42	2172.5	1859.7	48.4	222.4	15	222.9	28	85.8	-22.5	36	-9.6	2130.5	111.8	5	95.1	-7.1	21	2.8
BT1213SWRLCP02SMPU	2012	70	Hochfilzen	12750	33	20	91	-5.7	69	M	29	61	2206.2	1802	139	204.2	31	92.7	47	28.1	68.1	18	-9.8	2145.2	126.5	24	37.4	-7.3	3	93.4
BT1213SWRLCP02SMPU	2012	70	Hochfilzen	12750	33	20	91	-5.7	69	M	30	40	2206.7	1858.7	95.1	212.9	13	11.3	26	84.8	24.2	19	-2.1	2166.7	148	3	94.1	0.4	4	49.5
BT1213SWRLCP02SMPU	2012	70	Hochfilzen	12750	33	20	91	-5.7	69	M	1	14	2054.8	1773.9	70.9	196	3	8.6	0	0	0	0	0	2040.8	22.1	-23	9.3	2.5	-15	25.3
BT1213SWRLCP02SMPU	2012	70	Hochfilzen	12750	33	20	91	-5.7	69	M	2	37	2055.7	1764.6	45.6	208.5	11	153	23	-9.3	-25.3	15	-2.5	2018.7	0	0	0	0	0	0
BT1213SWRLCP02SMPU	2012	70	Hochfilzen	12750	33	20	91	-5.7	69	M	4	37	2066.1	1779.9	46.1	203.1	12	0.9	23	6	-24.8	12	-4.9	2029.1	10.4	0	15.3	-2.4	-3	0.5
BT1213SWRLCP01SWPU	2012	70	Hochfilzen	12750	33	20	91	-5.7	69	M	5	0	2069.9	1799.4	74.1	196.4	1	409.9	-14	25.5	3.2	5	-4.6	2069.9	51.2	-37	34.8	-2.1	-10	28.5
BT1213SWRLCP02SMPU	2012	70	Hochfilzen	12750	33	20	91	-5.7	69	M	6	45	2090.6	1783.7	70.6	191.3	17	38.3	31	9.8	-0.3	-4	-0.7	2045.6	26.9	8	19.1	1.8	-19	25
BT1213SWRLCP02SMPU	2012	70	Hochfilzen	12750	33	20	91	-5.7	69	M	7	44	2093.1	1766.6	90.8	191.7	16	117.7	30	-7.3	19.9	0	-4.3	2049.1	30.4	7	2	-1.8	-15	45.2
BT1213SWRLCP02SMPU	2012	70	Hochfilzen	12750	33	20	91	-5.7	69	M	8	57	2120.7	1783.4	69.6	210.7	24	93.2	43	9.5	-1.3	17	-2.3	2063.7	45	20	18.8	0.2	2	24
BT1213SWRLCP02SMPU	2012	70	Hochfilzen	12750	33	20	91	-5.7	69	M	9	26	2121.6	1789.4	95.9	210.3	5	95	12	15.5	25	11	3.3	2095.6	76.9	-11	24.8	5.8	-4	50.3
BT1213SWRLCP02SMPU	2012	70	Hochfilzen	12750	33	20	91	-5.7	69	M	10	69	2126.7	1813.7	44.8	199.2	36	197.9	55	39.8	-26.1	3	0.2	2057.7	39	32	49.1	2.7	-12	-0.8
BT1213SWRLCP02SMPU	2012	70	Hochfilzen	12750	33	20	91	-5.7	69	M	11	32	2138.5	1793.5	94.9	218.1	9	156.1	18	19.6	24	18	4.1	2106.5	87.8	-5	28.9	6.6	3	49.3
BT1213SWRLCP02SMPU	2012	70	Hochfilzen	12750	33	20	91	-5.7	69	M	12	27	2143.4	1805.6	95.7	215.1	6	66.8	13	31.7	24.8	19	0.1	2116.4	97.7	-10	41	2.6	4	50.1
BT1213SWRLCP02SMPU	2012	70	Hochfilzen	12750	33	20	91	-5.7	69	M	13	84	2146.7	1792.4	68.8	201.5	45	268	70	18.5	-2.1	9	-3.5	2062.7	44	47	27.8	-1	-6	23.2
BT1213SWRLCP02SMPU	2012	70	Hochfilzen	12750	33	20	91	-5.7	69	M	14	64	2146.8	1754.7	113.8	214.3	34	174	50	-19.2	42.9	14	4.3	2082.8	64.1	27	-9.9	6.8	-1	68.2
BT1213SWRLCP02SMPU	2012	70	Hochfilzen	12750	33	20	91	-5.7	69	M	15	61	2147.5	1783.3	88.7	214.5	30	127.7	47	9.4	17.8	19	-0.5	2086.5	67.8	24	18.7	2	4	43.1
BT1213SWRLCP02SMPU	2012	70	Hochfilzen	12750	33	20	91	-5.7	69	M	16	56	2148	1790	90.5	211.5	23	127.6	42	16.1	19.6	17	-1.5	2092	73.3	19	25.4	1	2	44.9
BT1213SWRLCP02SMPU	2012	70	Hochfilzen	12750	33	20	91	-5.7	69	M	17	25	2149.8	1789.2	113.6	222	4	0	11	15.3	42.7	26	0	2124.8	106.1	-12	24.6	2.5	11	68
BT1213SWRLCP02SMPU	2012	70	Hochfilzen	12750	33	20	91	-5.7	69	M	18	61	2157.5	1817.5	47.2	231.8	32	151.4	47	43.6	-23.7	34	1.8	2096.5	77.8	24	52.9	4.3	19	1.6
BT1213SWRLCP02SMPU	2012	70	Hochfilzen	12750	33	20	91	-5.7	69	M	19	60	2159.9	1776.5	87.8	235.6	28	195	46	2.6	16.9	41	-1.4	2099.9	81.2	23	11.9	1.1	26	42.2
BT1213SWRLCP02SMPU	2012	70	Hochfilzen	12750	33	20	91	-5.7	69	M	20	27	2165.2	1801.9	118.6	217.7	7	88.6	13	28	47.7	19	2.7	2138.2	119.5	-10	37.3	5.2	4	73
BT1213SWRLCP02SMPU	2012	70	Hochfilzen	12750	33	20	91	-5.7	69	M	22	75	2182.2	1764.8	136.6	205.8	42	135.5	61	-9.1	65.7	10	-0.2	2107.2	88.5	38	0.2	2.3	-5	91
BT1213SWRLCP02SMPU	2012	70	Hochfilzen	12750	33	20	91	-5.7	69	M	23	51	2182.4	1809.5	111.7	210.2	22	259.9	37	35.6	40.8	18	-3.8	2131.4	112.7	14	44.9	-1.3	3	66.1
BT1213SWRLCP02SMPU	2012	70	Hochfilzen	12750	33	20	91	-5.7	69	M	24	60	2182.5	1782.8	112.3	227.4	29	105.1	46	8.9	41.4	33	-1.6	2122.5	103.8	23	18.2	0.9	18	66.7
BT1213SWRLCP02SMPU	2012	70	Hochfilzen	12750	33	20	91	-5.7	69	M	25	74	2185.3	1800.2	92.4	218.7	40	207.7	60	26.3	21.5	30	-7.3	2111.3	92.6	37	35.6	-4.8	15	46.8
BT1213SWRLCP02SMPU	2012	70	Hochfilzen	12750	33	20	91	-5.7	69	M	26	107	2188	1798.4	69	213.6	52	224.9	93	24.5	-1.9	21	-3.4	2081	62.3	70	33.8	-0.9	6	23.4
BT1213SWRLCP02SMPU	2012	70	Hochfilzen	12750	33	20	91	-5.7	69	M	27	46	2189	1817.3	94.1	231.6	18	35.8	32	43.4	23.2	38	-2.4	2143	124.3	9	52.7	0.1	23	48.5
BT1213SWRLCP02SMPU	2012	70	Hochfilzen	12750	33	20	91	-5.7	69	M	28	74	2190.3	1827.1	96.6	192.6	41	130.5	60	53.2	25.7	0	-3.4	2116.3	97.6	37	62.5	-0.9	-15	51
BT1213SWRLCP03SMPU	2012	72	Pokljuka	12375	39	33	92	2.6	93	M	3	6	1986.6	1729.8	73.2	177.6	3	0	5	-14.6	23.1	13	-9.1	1980.6	55.1	-97	48.7	-4.7	-19	30.1
BT1213SWRLCP03SMPU	2012	72	Pokljuka	12375	39	33	92	2.6	93	M	21	113	2094.6	1710.3	65.8	205.5	46	209.6	112	-34.1	15.7	39	-7.2	1981.6	56.1	10	29.2	-2.8	7	22.7
BT1213SWRLCP03SMPU	2012	72	Pokljuka	12375	39	33	92	2.6	93	M	1	1	1969.2	1744.4	50.1	173.7	2	130.7	0	0	0	0	0	1968.2	42.7	-102	63.3	4.4	-32	7
BT1213SWRLCP03SMPU	2012	72	Pokljuka	12375	39	33	92	2.6	93	M	2	38	1973	1703.3	45.6	186.1	8	42.3	37	-41.1	-4.5	15	-2.6	1935	9.5	-65	22.2	1.8	-17	2.5
BT1213SWRLCP03SMPU	2012	72	Pokljuka	12375	39	33	92	2.6	93	M	4	49	1996.2	1710	67.9	169.3	14	184.3	48	-34.4	17.8	-2	-2.4	1947.2	21.7	-54	28.9	2	-34	24.8
BT1213SWRLCP03SMPU	2012	72	Pokljuka	12375	39	33	92	2.6	93	M	5	40	2003.1	1711.8	66.6	184.7	10	122	39	-32.6	16.5	9	2	1963.1	37.6	-63	30.7	6.4	-23	23.5
BT1213SWRLCP03SMPU	2012	72	Pokljuka	12375	39	33	92	2.6	93	M	6	38	2011.5	1699.7	94	179.8	7	145	37	-44.7	43.9	11	-4.9	1973.5	48	-65	18.6	-0.5	-21	50.9
BT1213SWRLCP03SMPU	2012	72	Pokljuka	12375	39	33	92	2.6	93	M	7	15	2014.3	1724.2	92.3	182.8	4	17.4	14	-20.2	42.2	9	0.1	1999.3	73.8	-88	43.1	4.5	-23	49.2
BT1213SWRLCP03SMPU	2012	72	Pokljuka	12375	39	33	92	2.6	93	M	8	19	2019	1725.3	93.7	181	5	45.1	18	-19.1	43.6	7	0.3	2000	74.5	-84	44.2	4.7	-25	50.6
BT1213SWRLCP03SMPU	2012	72	Pokljuka	12375	39	33	92	2.6	93	M	9	53	2022.5	1742.7	22.5	204.3	15	27	52	-1.7	-27.6	23	7.6	1969.5	44	-50	61.6	12	-9	-20.6
BT1213SWRLCP03SMPU	2012	72	Pokljuka	12375	39	33	92	2.6	93	M	10	103	2028.5	1681.1	43.1	201.3	38	215.3	102	-63.3	-7	32	-4.4	1925.5	0	0	0	0	0	0
BT1213SWRLCP03SMPU	2012	72	Pokljuka	12375	39	33	92	2.6	93	M	11	64	2046.8	1724.7	64.9	193.2	18	161.7	63	-19.7	14.8	22	-2.5	1982.8	57.3	-39	43.6	1.9	-10	21.8
BT1213SWRLCP03SMPU	2012	72	Pokljuka	12375	39	33	92	2.6	93	M	12	91	2051.7	1727.8	45.1	187.8	29	200.6	90	-16.6	-5	16	-1.9	1960.7	35.2	-12	46.7	2.5	-16	2
BT1213SWRLCP03SMPU	2012	72	Pokljuka	12375	39	33	92	2.6	93	M	13	104	2053.2	1707	69.8	172.4	40	330.2	103	-37.4	19.7	1	-2.3	1949.2	23.7	1	25.9	2.1	-31	26.7
BT1213SWRLCP03SMPU	2012	72	Pokljuka	12375	39	33	92	2.6	93	M	14	40	2053.3	1711.7	114.6	187	11	33.9	39	-32.7	64.5	17	-3.7	2013.3	87.8	-63	30.6	0.7	-15	71.5
BT1213SWRLCP03SMPU	2012	72	Pokljuka	12375	39	33	92	2.6	93	M	15	92	2053.5	1705.5	68.5	187.5	32	154.2	91	-38.9	18.4	8	5.8	1961.5	36	-11	24.4	10.2	-24	25.4
BT1213SWRLCP03SMPU	2012	72	Pokljuka	12375	39	33	92	2.6	93	M	16	60	2053.5	1715.8	90.4	187.3	16	53.3	59	-28.6	40.3	6	7.6	1993.5	68	-43	34.7	12	-26	47.3
BT1213SWRLCP03SMPU	2012	72	Pokljuka	12375	39	33	92	2.6	93	M	17	42	2064.7	1745.4	94.5	182.8	12	84.1	41	1	44.4	10	-0.9	2022.7	97.2	-61	64.3	3.5	-22	51.4
BT1213SWRLCP03SMPU	2012	72	Pokljuka	12375	39	33	92	2.6	93	M	18	74	2067.7	1703.8	114	175.9	21	279.3	73	-40.6	63.9	6	-3.8	1993.7	68.2	-29	22.7	0.6	-26	70.9
BT1213SWRLCP03SMPU	2012	72	Pokljuka	12375	39	33	92	2.6	93	M	19	129	2082.6	1696	64.2	193.4	58	340.1	128	-48.4	14.1	18	1.7	1953.6	28.1	26	14.9	6.1	-14	21.1
BT1213SWRLCP03SMPU	2012	72	Pokljuka	12375	39	33	92	2.6	93	M	20	39	2091.2	1758	118.5	175.7	9	3.8	38	13.6	68.4	4	-2	2052.2	126.7	-64	76.9	2.4	-28	75.4
BT1213SWRLCP02SWPU	2012	72	Pokljuka	12375	39	33	92	2.6	93	M	22	0	2099.9	1753.3	163.6	183	1	260	-1	8.9	113.5	8	1.3	2099.9	174.4	-103	72.2	5.7	-24	120.5
BT1213SWRLCP03SMPU	2012	72	Pokljuka	12375	39	33	92	2.6	93	M	23	28	2114.2	1782	117.4	186.8	6	49.8	27	37.6	67.3	16	-2.9	2086.2	160.7	-75	100.9	1.5	-16	74.3
BT1213SWRLCP03SMPU	2012	72	Pokljuka	12375	39	33	92	2.6	93	M	24	107	2115.7	1750.2	73.8	184.7	42	235.8	106	5.8	23.7	8	3	2008.7	83.2	4	69.1	7.4	-24	30.7
BT1213SWRLCP03SMPU	2012	72	Pokljuka	12375	39	33	92	2.6	93	M	25	92	2123.4	1775.2	71.6	184.6	31	187	91	30.8	21.5	11	-0.1	2031.4	105.9	-11	94.1	4.3	-21	28.5
BT1213SWRLCP03SMPU	2012	72	Pokljuka	12375	39	33	92	2.6	93	M	26	61	2130.9	1753.3	114.3	202.3	17	84.3	60	8.9	64.2	28	0.6	2069.9	144.4	-42	72.2	5	-4	71.2
BT1213SWRLCP03SMPU	2012	72	Pokljuka	12375	39	33	92	2.6	93	M	27	120	2137.4	1750.1	73.2	194.1	53	297	119	5.7	23.1	13	7.4	2017.4	91.9	17	69	11.8	-19	30.1
BT1213SWRLCP03SMPU	2012	72	Pokljuka	12375	39	33	92	2.6	93	M	28	99	2139.2	1749.9	93.1	197.2	36	294.4	98	5.5	43	23	0.5	2040.2	114.7	-4	68.8	4.9	-9	50
BT1213SWRLCP03SMPU	2012	72	Pokljuka	12375	39	33	92	2.6	93	M	29	85	2145.1	1737.2	118.6	204.3	25	236.2	84	-7.2	68.5	18	12.6	2060.1	134.6	-18	56.1	17	-14	75.5
BT1213SWRLCP03SMPU	2012	72	Pokljuka	12375	39	33	92	2.6	93	M	30	47	2153.5	1754.7	145.8	206	13	95.5	46	10.3	95.7	32	0.3	2106.5	181	-56	73.6	4.7	0	102.7
BT1213SWRLCP04SMPU	2012	74	Oberhof	12800	49	36	82	3.3	95	M	15	35	2091.3	1765.7	138.4	152.2	10	66.5	35	28	118.4	1	-34	2056.3	113.4	35	28	-34	1	118.4
BT1213SWRLCP04SMPU	2012	74	Oberhof	12800	49	36	82	3.3	95	M	19	30	2100.8	1747.6	131.4	191.8	8	137.8	30	9.9	111.4	-11	17.6	2070.8	127.9	30	9.9	17.6	-11	111.4
BT1213SWRLCP04SMPU	2012	74	Oberhof	12800	49	36	82	3.3	95	M	4	13	2006.9	1677	127.4	189.5	3	42.1	13	-60.7	107.4	5	-0.7	1993.9	51	13	-60.7	-0.7	5	107.4
BT1213SWRLCP04SMPU	2012	74	Oberhof	12800	49	36	82	3.3	95	M	29	39	2156.7	1718.7	179.9	219.1	12	49.9	39	-19	159.9	32	1.9	2117.7	174.8	39	-19	1.9	32	159.9
BT1213SWRLCP03SWPU	2012	74	Oberhof	12800	49	36	82	3.3	95	M	1	0	1942.9	1737.7	20	185.2	1	349.2	0	0	0	0	0	1942.9	0	0	0	0	0	0
BT1213SWRLCP04SMPU	2012	74	Oberhof	12800	49	36	82	3.3	95	M	2	13	1985	1741.6	41.8	188.6	2	0	13	3.9	21.8	4	-0.6	1972	29.1	13	3.9	-0.6	4	21.8
BT1213SWRLCP04SMPU	2012	74	Oberhof	12800	49	36	82	3.3	95	M	3	37	1992.8	1737.6	18.5	199.7	11	148.4	37	-0.1	-1.5	20	-5.5	1955.8	12.9	37	-0.1	-5.5	20	-1.5
BT1213SWRLCP04SMPU	2012	74	Oberhof	12800	49	36	82	3.3	95	M	5	32	2009.4	1737.8	39.3	200.3	9	157.9	32	0.1	19.3	17	-1.9	1977.4	34.5	32	0.1	-1.9	17	19.3
BT1213SWRLCP04SMPU	2012	74	Oberhof	12800	49	36	82	3.3	95	M	6	15	2019.5	1719.5	86.6	198.4	5	86.9	15	-18.2	66.6	17	-3.8	2004.5	61.6	15	-18.2	-3.8	17	66.6
BT1213SWRLCP04SMPU	2012	74	Oberhof	12800	49	36	82	3.3	95	M	7	14	2029.8	1752.4	65.3	198.1	4	64	14	14.7	45.3	13	-0.1	2015.8	72.9	14	14.7	-0.1	13	45.3
BT1213SWRLCP04SMPU	2012	74	Oberhof	12800	49	36	82	3.3	95	M	8	21	2038	1772.9	64.8	179.3	6	76.6	21	35.2	44.8	-4	-1.9	2017	74.1	21	35.2	-1.9	-4	44.8
BT1213SWRLCP04SMPU	2012	74	Oberhof	12800	49	36	82	3.3	95	M	9	46	2058.8	1700.7	109.5	202.6	14	137.5	46	-37	89.5	21	-3.6	2012.8	69.9	46	-37	-3.6	21	89.5
BT1213SWRLCP04SMPU	2012	74	Oberhof	12800	49	36	82	3.3	95	M	10	52	2059.3	1731.7	62.7	212.9	17	143.6	52	-6	42.7	33	-5.3	2007.3	64.4	52	-6	-5.3	33	42.7
BT1213SWRLCP04SMPU	2012	74	Oberhof	12800	49	36	82	3.3	95	M	11	40	2080.4	1730.8	108.8	200.8	13	213.8	40	-6.9	88.8	17	-1.4	2040.4	97.5	40	-6.9	-1.4	17	88.8
BT1213SWRLCP04SMPU	2012	74	Oberhof	12800	49	36	82	3.3	95	M	12	29	2080.7	1739.2	104.8	207.7	7	95.1	29	1.5	84.8	25	-2.5	2051.7	108.8	29	1.5	-2.5	25	84.8
BT1213SWRLCP04SMPU	2012	74	Oberhof	12800	49	36	82	3.3	95	M	13	83	2082.4	1734.5	64.2	200.7	28	219.3	83	-3.2	44.2	19	-3.5	1999.4	56.5	83	-3.2	-3.5	19	44.2
BT1213SWRLCP04SMPU	2012	74	Oberhof	12800	49	36	82	3.3	95	M	14	51	2086.5	1718.8	106.8	209.9	16	163.8	51	-18.9	86.8	28	-3.3	2035.5	92.6	51	-18.9	-3.3	28	86.8
BT1213SWRLCP04SMPU	2012	74	Oberhof	12800	49	36	82	3.3	95	M	16	74	2093.5	1713.2	105.1	201.2	24	186.5	74	-24.5	85.1	21	-5	2019.5	76.6	74	-24.5	-5	21	85.1
BT1213SWRLCP04SMPU	2012	74	Oberhof	12800	49	36	82	3.3	95	M	17	86	2098.2	1780.4	41.4	190.4	30	193	86	42.7	21.4	12	-6.8	2012.2	69.3	86	42.7	-6.8	12	21.4
BT1213SWRLCP04SMPU	2012	74	Oberhof	12800	49	36	82	3.3	95	M	18	92	2100.8	1738.8	60.4	209.6	33	278.2	92	1.1	40.4	30	-5.6	2008.8	65.9	92	1.1	-5.6	30	40.4
BT1213SWRLCP04SMPU	2012	74	Oberhof	12800	49	36	82	3.3	95	M	20	48	2106.7	1767.8	107.1	183.8	15	115.9	48	30.1	87.1	2	-3.4	2058.7	115.8	48	30.1	-3.4	2	87.1
BT1213SWRLCP04SMPU	2012	74	Oberhof	12800	49	36	82	3.3	95	M	21	54	2123.7	1760.5	107.8	201.4	18	116.4	54	22.8	87.8	26	-9.8	2069.7	126.8	54	22.8	-9.8	26	87.8
BT1213SWRLCP04SMPU	2012	74	Oberhof	12800	49	36	82	3.3	95	M	22	75	2127.4	1746.4	109.2	196.8	25	150.6	75	8.7	89.2	13	-1.4	2052.4	109.5	75	8.7	-1.4	13	89.2
BT1213SWRLCP04SMPU	2012	74	Oberhof	12800	49	36	82	3.3	95	M	23	70	2129	1775.7	87.4	195.9	22	225.5	70	38	67.4	20	-9.3	2059	116.1	70	38	-9.3	20	67.4
BT1213SWRLCP04SMPU	2012	74	Oberhof	12800	49	36	82	3.3	95	M	24	73	2129.4	1757.1	88.6	210.7	23	186.1	73	19.4	68.6	30	-4.5	2056.4	113.5	73	19.4	-4.5	30	68.6
BT1213SWRLCP04SMPU	2012	74	Oberhof	12800	49	36	82	3.3	95	M	25	95	2134.4	1767	64.6	207.8	34	157.9	95	29.3	44.6	27	-4.4	2039.4	96.5	95	29.3	-4.4	27	44.6
BT1213SWRLCP04SMPU	2012	74	Oberhof	12800	49	36	82	3.3	95	M	26	85	2135.9	1747.6	106.3	197	29	139.5	85	9.9	86.3	19	-7.2	2050.9	108	85	9.9	-7.2	19	86.3
BT1213SWRLCP04SMPU	2012	74	Oberhof	12800	49	36	82	3.3	95	M	27	101	2139.4	1778.8	43	216.6	38	328.3	101	41.1	23	33	-1.6	2038.4	95.5	101	41.1	-1.6	33	23
BT1213SWRLCP04SMPU	2012	74	Oberhof	12800	49	36	82	3.3	95	M	28	110	2156.5	1719.5	126.7	200.3	43	225.6	110	-18.2	106.7	15	0.1	2046.5	103.6	110	-18.2	0.1	15	106.7
BT1213SWRLCP04SMPU	2012	74	Oberhof	12800	49	36	82	3.3	95	M	30	76	2158.1	1775.3	108.9	197.9	26	184.5	76	37.6	88.9	18	-5.3	2082.1	139.2	76	37.6	-5.3	18	88.9
BT1213SWRLCP04SWPU	2012	76	Anterselva	12845	26	11	71	-3.4	55	M	1	0	1884.2	1622.5	82.5	179.2	1	203.5	0	0	0	0	0	1884.2	38.5	-92	21.1	0.1	-13	30.3
BT1213SWRLCP06SMPU	2012	76	Anterselva	12845	26	11	71	-3.4	55	M	2	20	1906.8	1640.6	58.1	188.1	3	40	20	18.1	-24.4	4	4.9	1886.8	41.1	-72	39.2	5	-9	5.9
BT1213SWRLCP06SMPU	2012	76	Anterselva	12845	26	11	71	-3.4	55	M	3	42	1910	1621.4	55.5	191.1	8	86.7	42	-1.1	-27	5	6.9	1868	22.3	-50	20	7	-8	3.3
BT1213SWRLCP06SMPU	2012	76	Anterselva	12845	26	11	71	-3.4	55	M	4	38	1922.7	1613.8	75.8	195.1	6	41.4	38	-8.7	-6.7	18	-2.1	1884.7	39	-54	12.4	-2	5	23.6
BT1213SWRLCP06SMPU	2012	76	Anterselva	12845	26	11	71	-3.4	55	M	5	13	1924.2	1605.5	118.3	187.4	2	0	13	-17	35.8	6	2.2	1911.2	65.5	-79	4.1	2.3	-7	66.1
BT1213SWRLCP06SMPU	2012	76	Anterselva	12845	26	11	71	-3.4	55	M	6	37	1925.6	1614.5	96	178.1	5	22.6	37	-8	13.5	-2	0.9	1888.6	42.9	-55	13.1	1	-15	43.8
BT1213SWRLCP06SMPU	2012	76	Anterselva	12845	26	11	71	-3.4	55	M	7	63	1930	1594.4	92.9	179.7	17	153.9	63	-28.1	10.4	-4	4.5	1867	21.3	-29	-7	4.6	-17	40.7
BT1213SWRLCP06SMPU	2012	76	Anterselva	12845	26	11	71	-3.4	55	M	8	81	1932.2	1611.5	34.5	205.2	30	106.7	81	-11	-48	20	6	1851.2	5.5	-11	10.1	6.1	7	-17.7
BT1213SWRLCP06SMPU	2012	76	Anterselva	12845	26	11	71	-3.4	55	M	9	53	1933.6	1611.5	75.4	193.7	11	107.1	53	-11	-7.1	11	3.5	1880.6	34.9	-39	10.1	3.6	-2	23.2
BT1213SWRLCP06SMPU	2012	76	Anterselva	12845	26	11	71	-3.4	55	M	10	70	1935.6	1608.6	73	184	21	259.6	70	-13.9	-9.5	3	1.8	1865.6	19.9	-22	7.2	1.9	-10	20.8
BT1213SWRLCP06SMPU	2012	76	Anterselva	12845	26	11	71	-3.4	55	M	11	92	1937.7	1601.4	52.2	192.1	34	126.6	92	-21.1	-30.3	13	-0.1	1845.7	0	0	0	0	0	0
BT1213SWRLCP06SMPU	2012	76	Anterselva	12845	26	11	71	-3.4	55	M	12	62	1946	1622.2	74.1	187.7	15	112.1	62	-0.3	-8.4	5	3.5	1884	38.3	-30	20.8	3.6	-8	21.9
BT1213SWRLCP06SMPU	2012	76	Anterselva	12845	26	11	71	-3.4	55	M	13	72	1961.4	1609.2	89.2	191	23	121.9	72	-13.3	6.7	16	-4.2	1889.4	43.7	-20	7.8	-4.1	3	37
BT1213SWRLCP06SMPU	2012	76	Anterselva	12845	26	11	71	-3.4	55	M	14	106	1967.6	1603.3	74.3	184	45	229.2	106	-19.2	-8.2	5	-0.2	1861.6	15.9	14	1.9	-0.1	-8	22.1
BT1213SWRLCP06SMPU	2012	76	Anterselva	12845	26	11	71	-3.4	55	M	15	77	1969.1	1626.8	74.5	190.8	26	116.2	77	4.3	-8	13	-1.4	1892.1	46.4	-15	25.4	-1.3	0	22.3
BT1213SWRLCP06SMPU	2012	76	Anterselva	12845	26	11	71	-3.4	55	M	16	40	1970.9	1640	98.8	192.1	7	38.5	40	17.5	16.3	6	6.9	1930.9	85.2	-52	38.6	7	-7	46.6
BT1213SWRLCP06SMPU	2012	76	Anterselva	12845	26	11	71	-3.4	55	M	17	101	1972.1	1624.6	53.4	193.1	41	180	101	2.1	-29.1	14	-0.1	1871.1	25.4	9	23.2	0	1	1.2
BT1213SWRLCP06SMPU	2012	76	Anterselva	12845	26	11	71	-3.4	55	M	18	93	1973.8	1622.4	76.2	182.2	35	53.5	93	-0.1	-6.3	4	-1	1880.8	35.1	1	21	-0.9	-9	24
BT1213SWRLCP06SMPU	2012	76	Anterselva	12845	26	11	71	-3.4	55	M	19	47	1988	1622.9	117.8	200.3	9	25.8	47	0.4	35.3	15	6.1	1941	95.3	-45	21.5	6.2	2	65.6
BT1213SWRLCP06SMPU	2012	76	Anterselva	12845	26	11	71	-3.4	55	M	20	56	1990.7	1653.3	92.7	188.7	12	49.4	56	30.8	10.2	11	-1.5	1934.7	89	-36	51.9	-1.4	-2	40.5
BT1213SWRLCP06SMPU	2012	76	Anterselva	12845	26	11	71	-3.4	55	M	21	81	1990.9	1600.4	116.7	192.8	29	174.7	81	-22.1	34.2	11	2.6	1909.9	64.2	-11	-1	2.7	-2	64.5
BT1213SWRLCP06SMPU	2012	76	Anterselva	12845	26	11	71	-3.4	55	M	22	51	1991.3	1648.4	96.4	195.5	10	103.8	51	25.9	13.9	11	5.3	1940.3	94.6	-41	47	5.4	-2	44.2
BT1213SWRLCP06SMPU	2012	76	Anterselva	12845	26	11	71	-3.4	55	M	23	99	1995.6	1608.8	98	189.8	39	111.6	99	-13.7	15.5	8	2.6	1896.6	50.9	7	7.4	2.7	-5	45.8
BT1213SWRLCP06SMPU	2012	76	Anterselva	12845	26	11	71	-3.4	55	M	24	98	1995.8	1585.3	117.6	194.9	38	256.2	98	-37.2	35.1	17	-1.3	1897.8	52.1	6	-16.1	-1.2	4	65.4
BT1213SWRLCP06SMPU	2012	76	Anterselva	12845	26	11	71	-3.4	55	M	25	59	1996.3	1639.9	115.7	181.7	14	118.9	59	17.4	33.2	-2	4.5	1937.3	91.6	-33	38.5	4.6	-15	63.5
BT1213SWRLCP06SMPU	2012	76	Anterselva	12845	26	11	71	-3.4	55	M	26	75	2000.4	1641.9	76.9	206.6	25	179.4	75	19.4	-5.6	25	2.4	1925.4	79.7	-17	40.5	2.5	12	24.7
BT1213SWRLCP06SMPU	2012	76	Anterselva	12845	26	11	71	-3.4	55	M	27	78	2003.1	1645.7	100.5	178.9	27	84.9	78	23.2	18	3	-3.3	1925.1	79.4	-14	44.3	-3.2	-10	48.3
BT1213SWRLCP06SMPU	2012	76	Anterselva	12845	26	11	71	-3.4	55	M	28	57	2003.1	1645.9	112.7	187.5	13	106.5	57	23.4	30.2	10	-1.7	1946.1	100.4	-35	44.5	-1.6	-3	60.5
BT1213SWRLCP06SMPU	2012	76	Anterselva	12845	26	11	71	-3.4	55	M	29	72	2006.1	1615.9	140.1	178.1	22	51.4	72	-6.6	57.6	-2	0.9	1934.1	88.4	-20	14.5	1	-15	87.9
BT1213SWRLCP06SMPU	2012	76	Anterselva	12845	26	11	71	-3.4	55	M	30	88	2010.8	1634.2	122.9	165.7	33	138.5	88	11.7	40.4	-12	-1.5	1922.8	77.1	-4	32.8	-1.4	-25	70.7
BT1213SWRLCP07SMPU	2012	78	Holmenkollen	12463	50	45	87	4.6	38	M	1	0	2028.2	1774.1	76.5	177.6	2	27.7	0	0	0	0	0	2028.2	0	0	0	0	0	0
BT1213SWRLCP06SWPU	2012	78	Holmenkollen	12463	50	45	87	4.6	38	M	2	0	2055.9	1765.8	101.7	188.4	1	236	0	-8.3	25.2	6.6	4.2	2055.9	27.7	0	-8.3	4.2	6.6	25.2
BT1213SWRLCP07SMPU	2012	78	Holmenkollen	12463	50	45	87	4.6	38	M	3	18	2063.7	1764	103	178.7	5	114.2	18	-10.1	26.5	2.2	-1.1	2045.7	17.5	18	-10.1	-1.1	2.2	26.5
BT1213SWRLCP07SMPU	2012	78	Holmenkollen	12463	50	45	87	4.6	38	M	4	30	2075.6	1779.3	76	190.3	7	99.5	30	5.2	-0.5	11.2	1.5	2045.6	17.4	30	5.2	1.5	11.2	-0.5
BT1213SWRLCP07SMPU	2012	78	Holmenkollen	12463	50	45	87	4.6	38	M	5	56	2091	1783.7	79.4	171.9	14	125.8	56	9.6	2.9	-9.5	3.8	2035	6.8	56	9.6	3.8	-9.5	2.9
BT1213SWRLCP07SMPU	2012	78	Holmenkollen	12463	50	45	87	4.6	38	M	6	52	2099.3	1796.2	82.2	168.9	11	125.7	52	22.1	5.7	-8.8	0.1	2047.3	19.1	52	22.1	0.1	-8.8	5.7
BT1213SWRLCP07SMPU	2012	78	Holmenkollen	12463	50	45	87	4.6	38	M	7	60	2109.6	1781	76.8	191.8	16	243.9	60	6.9	0.3	14.8	-0.6	2049.6	21.4	60	6.9	-0.6	14.8	0.3
BT1213SWRLCP07SMPU	2012	78	Holmenkollen	12463	50	45	87	4.6	38	M	8	8	2115.4	1791.9	128.3	187.2	3	0	8	17.8	51.8	7.3	2.3	2107.4	79.2	8	17.8	2.3	7.3	51.8
BT1213SWRLCP07SMPU	2012	78	Holmenkollen	12463	50	45	87	4.6	38	M	9	29	2127.7	1768.4	148.3	182	6	35.5	29	-5.7	71.8	6.6	-2.2	2098.7	70.5	29	-5.7	-2.2	6.6	71.8
BT1213SWRLCP07SMPU	2012	78	Holmenkollen	12463	50	45	87	4.6	38	M	10	86	2137.6	1802.8	78.3	170.5	23	174.5	86	28.7	1.8	-8.9	1.8	2051.6	23.4	86	28.7	1.8	-8.9	1.8
BT1213SWRLCP07SMPU	2012	78	Holmenkollen	12463	50	45	87	4.6	38	M	11	18	2142.4	1771.5	148.6	204.3	4	87.2	18	-2.6	72.1	23	3.7	2124.4	96.2	18	-2.6	3.7	23	72.1
BT1213SWRLCP07SMPU	2012	78	Holmenkollen	12463	50	45	87	4.6	38	M	12	73	2146.9	1792.8	97.7	183.4	18	246.9	73	18.7	21.2	8.8	-3	2073.9	45.7	73	18.7	-3	8.8	21.2
BT1213SWRLCP07SMPU	2012	78	Holmenkollen	12463	50	45	87	4.6	38	M	13	52	2153.9	1766	161.8	174.1	10	161.7	52	-8.1	85.3	-8.7	5.2	2101.9	73.7	52	-8.1	5.2	-8.7	85.3
BT1213SWRLCP07SMPU	2012	78	Holmenkollen	12463	50	45	87	4.6	38	M	14	54	2154	1767.1	143.1	189.8	13	71.1	54	-7	66.6	6	6.2	2100	71.8	54	-7	6.2	6	66.6
BT1213SWRLCP07SMPU	2012	78	Holmenkollen	12463	50	45	87	4.6	38	M	15	109	2154.9	1763.9	99.3	182.7	32	230.2	109	-10.2	22.8	1.8	3.3	2045.9	17.7	109	-10.2	3.3	1.8	22.8
BT1213SWRLCP07SMPU	2012	78	Holmenkollen	12463	50	45	87	4.6	38	M	16	92	2161.2	1792.5	78.3	198.4	26	319	92	18.4	1.8	18.7	2.1	2069.2	41	92	18.4	2.1	18.7	1.8
BT1213SWRLCP07SMPU	2012	78	Holmenkollen	12463	50	45	87	4.6	38	M	17	120	2179	1807.5	79.3	172.2	41	192.2	120	33.4	2.8	-3.9	-1.5	2059	30.8	120	33.4	-1.5	-3.9	2.8
BT1213SWRLCP07SMPU	2012	78	Holmenkollen	12463	50	45	87	4.6	38	M	18	48	2189.9	1799.5	149.2	193.2	9	231.8	48	25.4	72.7	12.8	2.8	2141.9	113.7	48	25.4	2.8	12.8	72.7
BT1213SWRLCP07SMPU	2012	78	Holmenkollen	12463	50	45	87	4.6	38	M	19	104	2200.3	1811.1	78.3	206.9	29	181	104	37	1.8	28.1	1.2	2096.3	68.1	104	37	1.2	28.1	1.8
BT1213SWRLCP07SMPU	2012	78	Holmenkollen	12463	50	45	87	4.6	38	M	20	83	2202.7	1762.2	148.2	209.3	22	177	83	-11.9	71.7	32.4	-0.7	2119.7	91.5	83	-11.9	-0.7	32.4	71.7
[truncated: 250 more rows]
